# Supplementary material for: Familial Hyperaldosteronism Type 3 with a Rapidly Growing Adrenal Tumor: An In Situ Aldosterone Imaging Study
Source: MDPI journal article supplement (doi:10.3390/cimb44010010), 2021-12-28

(a) Pedigree

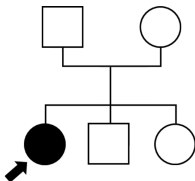

(b) Adenoma

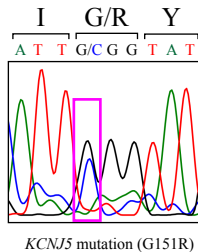

(c) Non-adenoma

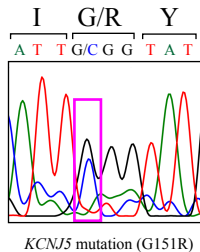

(d) Peripheral blood  
of index case

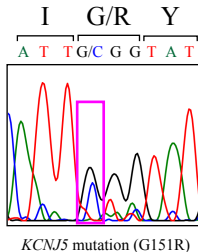

(e) Peripheral blood  
of index case's father

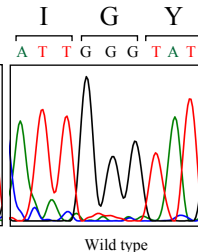

(f) Peripheral blood  
of index case's mother

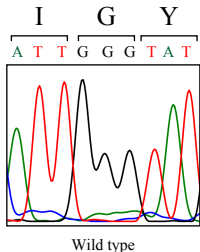

Supplement: s1 [file s1]
