# Supplementary material for: Familial Hyperaldosteronism Type 3 with a Rapidly Growing Adrenal Tumor: An In Situ Aldosterone Imaging Study
Source: Curr Issues Mol Biol. 2021 Dec 28;44(1):128–38. doi: 10.3390/cimb44010010 (PMC8929039; doi:10.3390/cimb44010010)
Supplement: Supplementary file 1 [file cimb-44-00010-s001.zip]

Archive with 12 entries (12 files):
- Figure S6.tif
- Figure_S1_FFPE blocks.pdf
- Figure_S2.pdf
- Figure_S3_Data 1_frozen.pdf
- Figure_S4. FFPE section staining.pdf
- Figure_S5_previous adrenal.pdf
- Figure_S7, KCNJ5.tif
- Figure_S8.tif
- Table_S1_clinical-qPCR data_original_20210117.xlsx
- Table_S2.xlsx
- Table_S3, clinical course.xlsx
- Takizawa_et_al._supplemntal_Figure_legends_20211229.pdf
