# Supplementary material for: Familial Hyperaldosteronism Type 3 with a Rapidly Growing Adrenal Tumor: An In Situ Aldosterone Imaging Study
Source: Curr Issues Mol Biol. 2021 Dec 28;44(1):128–38. doi: 10.3390/cimb44010010 (PMC8929039; doi:10.3390/cimb44010010)
Supplement: Supplementary file 1 [file cimb-44-00010-s001.zip › Table_S1_clinical-qPCR data_original_20210117.xlsx]

## Sheet: Table S1
Table S1. clinical data, qPCR data, and KCNJ5 mutation analysis data of the index case, parents of the index case, and APA cases.
Case identification #				clinical data											DNA/RNA #	sample name		qPCR results					KCNJ5 mutation analyses
cases	Kansai Medical Univ.	SIMC-Uro		age	sex	side	diagnosis	PAC (before ADX)	PAC (after ADX)	PRA (before ADX)	PRA (after ADX)	serum K (before ADX)	serum K (after ADX)					ave dCt		ddCt	CYP11B2 mRNA expression		KCNJ5 (p.G151)	KCNJ5 (p.L168R)	amino acid change in KCNJ5				IHC for CYP11B2
index case	KMUAP1			27	female	right	de novo FH3	1080	83	0.1	2	4.7†	4.6†		86	N1		6.71		-19.21	606438
															87	N2		6.895		-19.025	533452
															88	N3		5.6		-20.32	1.30897e+06
															89	T1		6.83		-19.09	558037
															90	T2		8.35		-17.57	194579
															91	T3		6.195		-19.725	866596
															92	blood
															155	hair
mother of the index case				n.a.	female		non-PA	n.a.	n.a.	n.a.	n.a.	n.a.	n.a.		93	blood from mother
father of the index case				n.a.	male		non-PA	n.a.	n.a.	n.a.	n.a.	n.a.	n.a.		156	blood from father
APA #7				46	male	left	APA	208	121	0.5	0.5	4	3.8		94	KS-APA_7_T		17.205	removed				GGG	CTC					1
															95	KS-APA_7_N		16.745	removed				GGG	CTC
APA #8	*			35	female	left	APA	1130	72	0.1	0.3	3.8	4		96	KS-APA_8_N		12.855		-13.065	8569.53		GGG	CTC					2
															97	KS-APA_8_T		5.78		-20.14	1.15543e+06		GGG	CTC
APA #9				35	male	right	APA	280	91	0.1	0.3	2.9	4.3		98	KS-APA_9_N		8.855		-17.065	137112		GGG						3
															99	KS-APA_9_T1		7.275		-18.645	409925		AGG		p.G151R
															100	KS-APA_9_T2		14.115	removed
APA #10	*			41	female	left	APA	431	78	<0.1	0.7	2.9	4.7		101	KS-APA_10_T		7.42		-18.5	370728		GGG	CGC	p.L168R				4
															102	KS-APA_10_N		16.44		-9.48	714.109		GGG	CTC
APA #11	*			31	male	right	APA	464	79	0.2	0.3	4	3.9		103	KS-APA_11_N		12.24		-13.68	13124.7		GGG	CTC					5
															104	KS-APA_11_T		6.325		-19.595	791923		GGG	CGC	p.L168R
APA #12	*			62	male	left	APA	708	77	0.7	1.8	2.3	4.7		105	KS-APA_12_T		6.265		-19.655	825552		GGG	CTC					6
															106	KS-APA_12_N		7.715		-18.205	302170		GGG	CTC
APA #13	*			60	male	right	APA	321	85	0.2	1.2	3.4	4.3		107	KS-APA_13_T		6.98		-18.94	502931		GGG	CTC					7
															108	KS-APA_13_N		16.455		-9.465	706.722		GGG	CTC
APA #14	*			38	female	left	APA	438	116	0.1	2.1	2.7	4.4		109	KS-APA_14_T		6.86		-19.06	546552		GGG	CATC_ins	p.L168Hfs*93				8
															110	KS-APA_14_N		22.84		-3.08	8.45614		GGG	CTC
APA #15	*			39	female	left	APA	176	75	0.4	0.4	3.2	4		111	KS-APA_15_T		6.34		-19.58	783732		AGG		p.G151R				9
															112	KS-APA_15_N		10.7		-15.22	38166		GGG
APA #16	*			54	female	left	APA	291	92	0.5	1.3	3.3	4.7		113	KS-APA_16_T		6.225		-19.695	848762		GGG	CTC					10
															114	KS-APA_16_N		15.985		-9.935	978.888		GGG	CTC
APA #17	*			53	female	right	APA	275	81	0.1	0.3	3.4	4.1		115	KS-APA_17_T		6.72		-19.2	602249		GGG	CTC					11
															116	KS-APA_17_N		16.025		-9.895	952.12		GGG	CTC
APA #18		12955		57	female	right	APA plus SCS	76.7	n.a.	0.9	n.a.	4.1	4.1		117	KS-APA_18_T		21.63	removed				GGG	CTC					12
															118	KS-APA_18_N		12.745	removed				GGG	CTC
APA #19		12956		62	female	right	APA plus SCS	170	99	0.4	n.a.	4.1	4.3		119	KS-APA_19_T		26.255	removed				GGG	CTC					13
															120	KS-APA_19_N		10.61	removed				GGG	CTC
APA #20	*	12957		60	female	left	APA	154	61	0.6	0.4	3.7	3.7		121	KS-APA_20_T		7.735		-18.185	298010		GGG	CGC	p.L168R				14
															122	KS-APA_20_N		15.57		-10.35	1305.15		GGG	CTC
APA #21	*	12958		65	male	left	APA	306	142	0.4	1.3	2.8	4.6		123	KS-APA_21_T		9.085		-16.835	116907		AGG	CTC	p.G151R				15
															124	KS-APA_21_N		14.345		-11.575	3050.86		GGG	CTC
APA #22	*	12959		36	male	right	APA	238	98	0.2	0.4	3	4.4		125	KS-APA_22_T		6.035		-19.885	968237		AGG	CTC	p.G151R				16
															126	KS-APA_22_N		18.44		-7.48	178.527		GGG	CTC
APA #23	*	12960		59	male	left	APA	760	n.a.	0.3	n.a.	2.9	4.7		127	KS-APA_23_N		25.92	reference	0	1		GGG	CTC					17
															128	KS-APA_23_T		7.655		-18.265	315002		GGG	CTC
APA #24	*	12961		62	male	right	APA	192	n.a.	0.5	n.a.	3.3	4		129	KS-APA_24_T		6.51		-19.41	696614		AGG	CTC	p.G151R				18
															130	KS-APA_24_N		22.52		-3.4	10.5561		GGG	CTC
APA #25	*	12962		66	male	left	APA plus SCS	n.a.	n.a.	n.a.	n.a.	n.a.	n.a.		131	KS-APA_25_N		21.375		-4.545	23.3443		GGG	CTC					19
															132	KS-APA_25_T		8.73		-17.19	149522		AGG	CTC	p.G151R
APA #26		12963		68	female	left	APA	n.a.	n.a.	n.a.	n.a.	n.a.	n.a.		133	KS-APA_26_N		15.71	removed				GGG	CTC					20
															134	KS-APA_26_T		27.44	removed				GGG	CTC
APA: aldosterone-producing adrenocortical adenoma; SCS: subclinical Cushing's syndrome; PAC: plasma aldosterone consentration; PRA: plasma renin activity; ADX: adrenalectomy; IHC: immunohistochemistry;†:under hemodialysis. We calculated the amplification efficiency for primer pair of CYP11B2. Relative target gene expression levels were evaluated by the 2-ΔΔCt method using 18s rRNA as an internal …
