# Supplementary material for: Familial Hyperaldosteronism Type 3 with a Rapidly Growing Adrenal Tumor: An In Situ Aldosterone Imaging Study
Source: Curr Issues Mol Biol. 2021 Dec 28;44(1):128–38. doi: 10.3390/cimb44010010 (PMC8929039; doi:10.3390/cimb44010010)
Supplement: Supplementary file 1 [file cimb-44-00010-s001.zip › Table_S2.xlsx]

## Sheet: Takizawa_et_al_microarray_20170
			#%result_name=Analysis_2
			#%array_type=Clariom_S_Human
			#%annotation=Clariom_S_Human.na36.hg38.transcript.csv
			#%comparison=adrenal_adj_n vs adrenal_t
genes associated with steroidogenesis	genes of upregulated pathway in T1 and T3	Description	ID	Gene Symbol	# in Figure S1	RNA89_T1	RNA90_T2	RNA91_T3	RNA86_N1	RNA87_N2	RNA88_N3		RNA137_YR#13_APA_outer	RNA138_YR#13_APA_inner	RNA139_YR#13_adjacent_adrenal	Liver1	Liver2	Liver3	Liver4	Testes1	Testes2	Testes3	Testes4	Muscle1	Muscle2	Muscle3	Muscle4	Spleen1	Spleen2	Spleen3	Spleen4	adrenal_adj_n Avg (log2)	adrenal_t Avg (log2)	adrenal_adj_n Standard Deviation	adrenal_t Standard Deviation	adrenal_adj_n Expressed	adrenal_t Expressed	Fold Change	P-val	FDR P-val	Overall F-Test	Overall FDR F-Test	Expressed in Both Conditions	Public Gene IDs	Chromosome	Strand	Group	total_probes	Cytoband
		mitochondrial amidoxime reducing component 1	TC0100011665.hg.1	2017-03-01		7.15137	6.97198	7.03454	6.50019	6.35518	6.78653	0.0211448	6.8258	5.21841	7.34151	11.665	11.665	11.4155	11.2956	4.54001	4.7423	4.82162	4.46406	4.28767	5.58059	5.16113	4.12417	6.2795	6.66836	5.31076	6.56532	6.5269	7.04538	0.2195	0.0910529	T	T	-1.43245	0.131715	0.457294	9.41e-16	8.02e-15	T	NM_022746; ENST00000366910; ENST00000407981; ENST00000443880; ENST00000463976; ENST00000472269; ENST00000492847; ENST00000496110; BC010619; OTTHUMT00000090904; OTTHUMT00000090905; OTTHUMT00000090906; OTTHUMT00000090907; OTTHUMT00000090908; OTTHUMT00000090909; OTTHUMT00000090910	chr1	+	Multiple_Complex	10	1q41
		membrane associated ring finger 1	TC0400012310.hg.1	2017-03-01		7.37001	6.96323	6.61596	6.68097	7.32634	6.8974	0.961517	8.78938	8.05742	8.16855	7.81979	6.96215	7.67362	7.52154	5.87729	5.50118	6.31381	5.33047	6.96179	6.78396	6.89464	6.8974	12.2606	12.1992	12.2144	12.1808	6.93741	6.97862	0.328465	0.377416	T	T	-1.02898	0.953256	0.989048	3.74e-17	5.01e-16	T	NM_001166373; NM_017923; ENST00000274056; ENST00000339875; ENST00000503008; ENST00000503104; ENST00000505391; ENST00000505517; ENST00000507270; ENST00000508725; ENST00000510075; ENST00000510696; ENST00000510786; ENST00000511245; ENST00000512214; ENST00000514618; ENST00000515471; OTTHUMT00000364156; OTTHUMT00000364493; OTTHUMT00000364494; OTTHUMT00000364495; OTTHUMT00000364496; OTTHUMT00000364497;…	chr4	-	Multiple_Complex	10	4q32.2
		Memczak2013 ANTISENSE, coding, INTERNAL, intronic best transcript NM_001166373	TC0400009182.hg.1	2017-03-01		3.31262	4.11553	4.16214	4.04799	3.51086	4.30062	0.815902	4.41873	3.52868	3.07881	4.14003	3.25515	3.9829	3.28513	3.21708	3.02778	3.13003	3.07709	5.03496	5.20152	3.87169	3.65761	3.79384	2.9217	4.19073	5.00671	3.99876	4.13788	0.40333	0.477584	F	F	-1.10124	0.836071	0.954649	0.0710198	0.0737072	F	hsa_circ_0001455	chr4	+	NonCoding	6
		mitochondrial amidoxime reducing component 2	TC0100011664.hg.1	2017-03-02		8.01233	7.50687	7.43664	6.60156	7.6059	7.22283	0.213697	7.43883	7.40578	8.63514	11.4235	11.5721	11.6504	11.6134	7.03135	6.90596	6.49502	7.01404	6.37632	6.18807	6.25731	6.48422	7.92483	7.88174	7.64404	7.36675	7.16979	7.47319	0.506856	0.31407	T	T	-1.23405	0.0369773	0.242981	3.35e-16	3.23e-15	T	NM_017898; ENST00000359316; ENST00000366913; ENST00000425560; ENST00000469583; ENST00000472447; ENST00000496078; BC011973; BC016859; OTTHUMT00000090911; OTTHUMT00000090912; OTTHUMT00000090913; OTTHUMT00000090914; OTTHUMT00000090915; OTTHUMT00000098787	chr1	+	Multiple_Complex	10	1q41
		membrane associated ring finger 2	TC1900006895.hg.1	2017-03-02		6.57659	6.24305	6.07172	6.05501	6.49985	5.89241	0.561953	5.43936	4.29565	4.50049	6.92814	7.90401	7.24376	6.92712	6.29173	6.58947	6.35996	6.61147	6.7684	6.87495	6.82116	7.08995	7.26288	7.91609	7.45357	7.71876	6.08342	6.27417	0.314458	0.256741	T	T	-1.14135	0.543981	0.82222	1.48e-09	3.35e-09	T	NM_001005415; NM_001005416; NM_016496; ENST00000215555; ENST00000381035; ENST00000594796; ENST00000595142; ENST00000595213; ENST00000601283; ENST00000601724; ENST00000602117; BC032624; BC111388; OTTHUMT00000460358; OTTHUMT00000460359; OTTHUMT00000460360; OTTHUMT00000460361; OTTHUMT00000461129; OTTHUMT00000461130; OTTHUMT00000461131	chr19	+	Multiple_Complex	10	19p13.2
		membrane associated ring finger 3	TC0500011935.hg.1	2017-03-03		7.63365	7.60799	7.78433	7.22349	7.24471	7.7196	0.177697	6.56936	5.83156	5.62199	6.18608	5.34592	5.18138	5.36201	11.6828	11.3151	11.2688	11.1919	6.72414	7.73479	7.2255	7.67627	7.90511	8.10241	7.96282	8.20191	7.23453	7.62134	0.280504	0.0952705	T	T	-1.3075	0.290403	0.649619	7.89e-16	6.87e-15	T	NM_178450; ENST00000308660; ENST00000502289; ENST00000504239; ENST00000506088; ENST00000515241; BC047569; BC146948; BC146964; OTTHUMT00000250955; OTTHUMT00000371417; OTTHUMT00000371418; OTTHUMT00000371420; OTTHUMT00000371421	chr5	-	Multiple_Complex	10	5q23.2
		membrane associated ring finger 4	TC0200015670.hg.1	2017-03-04		3.04875	3.66095	3.25822	4.33914	2.91419	3.86533	0.447461	3.48137	3.66939	3.51223	3.63373	3.42812	3.12167	4.00097	2.9909	2.48038	2.77707	3.02776	3.18025	2.96876	3.34843	3.30038	3.46988	3.46813	3.32988	2.79042	3.77674	3.29576	0.725677	0.311142	T	F	1.39568	0.200115	0.553031	0.113184	0.116285	F	NM_020814; ENST00000273067; BC098448; OTTHUMT00000337272	chr2	-	Multiple_Complex	10	2q35
		membrane associated ring finger 5	TC1000008467.hg.1	2017-03-05		10.8892	10.6298	11.4473	10.1895	10.7838	10.932	0.345632	7.02889	7.659	7.94918	10.6168	10.0948	10.5794	10.8729	10.3366	10.4537	10.1311	9.93166	11.2895	11.1056	10.9749	10.8573	9.72946	9.60299	9.03685	9.67812	10.8134	10.9401	0.392926	0.417752	T	T	-1.09175	0.174266	0.523995	3.02e-11	9.07e-11	T	NM_017824; ENST00000358935; ENST00000462465; ENST00000467521; ENST00000492319; BC015480; OTTHUMT00000049388; OTTHUMT00000049389; OTTHUMT00000049390; OTTHUMT00000049391; uc001khx.1	chr10	+	Multiple_Complex	10	10q23.32-q23.33
		membrane associated ring finger 6	TC0500006737.hg.1	2017-03-06		11.8368	12.0159	11.8413	12.495	11.9225	12.5127	0.111745	10.6929	11.06	12.0745	11.4453	11.6067	11.3984	11.5699	12.6768	12.5817	12.7088	12.6969	12.8781	12.9504	13.0671	12.9296	12.1183	12.1126	12.1533	12.3256	12.5035	11.8391	0.335765	0.102124	T	T	1.58485	0.0205298	0.179224	9.08e-10	2.13e-09	T	NM_001270660; NM_001270661; NM_005885; ENST00000274140; ENST00000449913; ENST00000502795; ENST00000503788; ENST00000505253; ENST00000506131; ENST00000507863; ENST00000510792; ENST00000510872; ENST00000511802; ENST00000512449; ENST00000514312; ENST00000514961; ENST00000606497; BC136461; BC136462; BC142679; BC142694; OTTHUMT00000366919; OTTHUMT00000366920; OTTHUMT00000366922; OTTHUMT00000366923; OT…	chr5	+	Multiple_Complex	10	5p15.2
		membrane associated ring finger 7	TC0200009789.hg.1	2017-03-07		11.8433	11.9489	12.1043	12.2243	12.1013	12.2363	0.0638381	6.44731	6.33271	7.87126	10.9799	10.7548	10.8292	10.7775	13.0273	12.8221	12.9833	12.8777	12.7007	12.086	12.1161	12.0263	11.9949	12.0399	11.7091	12.1008	12.23	11.9607	0.0747261	0.131307	T	T	1.20528	0.227575	0.585326	3.98e-19	1.13e-17	T	NM_001282805; NM_001282806; NM_001282807; NM_022826; ENST00000259050; ENST00000409175; ENST00000409591; ENST00000420397; ENST00000421037; ENST00000461582; ENST00000473749; ENST00000478396; ENST00000539065; BC065014; OTTHUMT00000255040; OTTHUMT00000333701; OTTHUMT00000333702; OTTHUMT00000333703; OTTHUMT00000333704; OTTHUMT00000333705; OTTHUMT00000333762; OTTHUMT00000333763	chr2	+	Multiple_Complex	10	2q24.2
		membrane associated ring finger 8	TC1000010497.hg.1	2017-03-08		10.7478	10.5828	10.8189	10.4734	10.5055	10.9633	0.709923	6.62721	6.35777	6.25131	10.1214	10.165	9.93956	9.88737	11.9053	11.9706	12.3347	12.5314	7.33568	7.83202	8.04474	7.58545	9.89406	10.1739	10.1135	9.88206	10.4901	10.7336	0.274087	0.121157	T	T	-1.18388	0.741187	0.918848	9.96e-18	1.64e-16	T	NM_001002266; NM_001282866; NM_145021; ENST00000319836; ENST00000395769; ENST00000451376; ENST00000453424; ENST00000453980; ENST00000476962; ENST00000602712; BC025394; BC066988; OTTHUMT00000047788; OTTHUMT00000051217; OTTHUMT00000051218; OTTHUMT00000051219; OTTHUMT00000051220; OTTHUMT00000470683	chr10	-	Multiple_Complex	10	10q11.21
		Transcript Identified by AceView, Entrez Gene ID(s) 220972	TC1000010498.hg.1	2017-03-08		4.89802	5.01293	4.89848	5.32578	6.01998	5.13163	0.110756	7.36032	8.66575	6.85798	4.81672	3.69025	5.30276	4.27507	4.46502	4.7099	4.62394	5.56304	4.58352	3.78816	3.89955	5.38327	5.88512	6.57974	6.71438	6.1162	5.3197	4.89826	0.467043	0.066211	T	F	1.33927	0.175479	0.526021	2.14e-07	3.64e-07	F	MARCH8.pAug10-unspliced	chr10	-	Unassigned	6
		membrane associated ring finger 9	TC1200007899.hg.1	2017-03-09		7.28692	7.87567	7.69387	7.09879	7.03234	7.31506	0.0723699	4.50605	4.931	5.80242	4.58271	5.08887	5.32077	4.88724	4.99875	4.2797	4.67433	5.36352	5.65405	6.05566	6.35375	5.57163	7.15025	7.18306	6.97582	7.39484	7.10351	7.65769	0.147828	0.301465	T	T	-1.46833	0.0818236	0.362835	3.04e-11	9.13e-11	T	NM_138396; ENST00000266643; ENST00000548358; ENST00000552279; BC009489; BC036455; OTTHUMT00000409244; OTTHUMT00000409245; OTTHUMT00000409246	chr12	+	Multiple_Complex	10	12q14.1
		membrane associated ring finger 10	TC1700011390.hg.1	2017-03-10		4.03327	3.86701	3.62606	3.75251	3.16825	3.71195	0.251448	3.3492	3.39871	3.4318	3.38841	3.36657	3.45394	3.3382	13.0338	13.3876	13.304	13.6158	3.85087	3.86228	3.01628	3.75902	3.21206	4.08203	3.20826	3.21254	3.7314	3.84928	0.326245	0.204743	F	F	-1.08514	0.249305	0.607893	1.6e-22	2.09e-20	F	NM_001100875; NM_001288779; NM_001288780; NM_152598; ENST00000311269; ENST00000456609; ENST00000544856; ENST00000578346; ENST00000579620; ENST00000580520; ENST00000582358; ENST00000582568; ENST00000583600; ENST00000583803; BC035021; OTTHUMT00000445248; OTTHUMT00000445249; OTTHUMT00000445250; OTTHUMT00000445251; OTTHUMT00000445252; OTTHUMT00000445253; OTTHUMT00000445254; OTTHUMT00000445255; OTTHUM…	chr17	-	Multiple_Complex	10	17q23.2
		membrane associated ring finger 11	TC0500013292.hg.1	2017-03-11		4.89444	4.68507	4.98736	5.18988	5.1912	5.19655	0.0196405	6.23109	4.87139	5.37498	5.61217	5.49585	5.17406	4.89741	12.2974	12.5475	12.4635	12.4802	5.04334	4.49875	5.19941	4.88235	4.73898	5.10137	4.8796	5.16715	5.19095	4.87592	0.00353211	0.154838	T	T	1.24404	0.109073	0.418196	6.62e-22	6.31e-20	T	NM_001102562; ENST00000332432; ENST00000507111; OTTHUMT00000366096; OTTHUMT00000366097	chr5	-	Coding	10	5p15.1
		septin 1	TC1600011520.hg.1	2017-09-01		4.96985	4.58927	4.82771	4.6554	4.80317	4.78992	0.721742	6.39627	5.8054	5.75666	4.5299	5.7612	4.02824	4.41662	3.68706	3.68268	3.46205	3.79671	4.55296	4.58313	5.07061	4.6459	8.49063	8.52286	8.16375	8.28691	4.79628	4.80675	0.0817591	0.19231	T	T	-1.00728	0.8719	0.966385	4.83e-13	2.09e-12	T	NM_052838; ENST00000321367; ENST00000562152; ENST00000563743; ENST00000563957; ENST00000566517; ENST00000568577; ENST00000572252; ENST00000573615; BC012161; OTTHUMT00000109636; OTTHUMT00000434606; OTTHUMT00000434607; OTTHUMT00000434608; OTTHUMT00000434609; OTTHUMT00000434610; OTTHUMT00000434611; OTTHUMT00000437002	chr16	-	Multiple_Complex	10	16p11.1
		septin 1	TC1600011519.hg.1	2017-09-01		5.20908	4.93914	4.26272	4.19012	4.38337	4.61548	0.255452	5.67578	5.90536	3.53258	4.51107	4.38471	4.93946	4.95041	3.86418	3.75871	3.51819	3.98272	5.1741	4.48928	4.14043	4.30242	3.87457	3.8618	3.69754	4.33313	4.39334	4.88654	0.212976	0.487512	T	T	-1.40757	0.139321	0.469321	1.41e-05	1.97e-05	T	ENST00000567783; ENST00000570039; OTTHUMT00000434668; OTTHUMT00000434669	chr16	-	NonCoding	10	16p11.1
		septin 2	TC0200011400.hg.1	2017-09-02		11.9082	12.0033	12.0253	12.218	12.1671	12.3066	0.00979707	6.81988	8.64894	8.64623	10.5145	10.4238	10.1165	10.3047	12.0685	12.0645	11.9809	11.6481	10.8477	10.4456	11.1665	10.5967	12.1187	11.5245	11.7687	11.9118	12.226	12.0105	0.0706156	0.0622257	T	T	1.16116	0.21302	0.568974	1.99e-15	1.55e-14	T	NM_001008491; NM_001008492; NM_001282972; NM_001282973; NM_004404; NM_006155; ENST00000360051; ENST00000366210; ENST00000391971; ENST00000391973; ENST00000401990; ENST00000402092; ENST00000407017; ENST00000407971; ENST00000411484; ENST00000420786; ENST00000421717; ENST00000425899; ENST00000428282; ENST00000428524; ENST00000429791; ENST00000434955; ENST00000436795; ENST00000437066; ENST00000441533…	chr2	+	Multiple_Complex	10	2q37
		septin 3	TC2200007505.hg.1	2017-09-03		6.74157	4.89874	6.21116	8.50451	5.34005	5.41407	0.710791	5.92763	6.04591	5.89299	5.23862	4.98855	5.18972	5.69147	5.82207	5.29872	5.59454	5.64845	5.45152	5.41131	5.38012	5.50983	5.21772	4.95454	5.22132	5.51672	5.37857	6.10701	1.80601	0.948666	T	T	-1.65685	0.387714	0.726959	0.388913	0.391708	T	NM_019106; NM_145733; ENST00000396417; ENST00000396425; ENST00000396426; ENST00000406029; ENST00000449288; ENST00000460267; BC111779; OTTHUMT00000075382; OTTHUMT00000257773; OTTHUMT00000322051; OTTHUMT00000322052; OTTHUMT00000322053; OTTHUMT00000322054	chr22	+	Multiple_Complex	10	22q13.2
		septin 4	TC1700011261.hg.1	2017-09-04		12.1623	13.8125	11.7579	12.3723	13.2418	13.6237	0.529359	8.47031	8.68361	10.7027	10.4772	10.3455	10.0154	10.4602	9.96493	9.78331	9.8261	10.0313	8.5519	8.3372	8.52721	8.11163	9.9024	9.72804	9.64408	9.83984	13.1655	12.0696	0.641312	1.08844	T	T	2.13751	0.166491	0.512272	1.3e-11	4.17e-11	T	NM_001198713; NM_001256782; NM_001256822; NM_004574; NM_080415; NM_080416; NR_037155; NR_104196; NR_104197; ENST00000317256; ENST00000317268; ENST00000393086; ENST00000412945; ENST00000426861; ENST00000457347; ENST00000577440; ENST00000577729; ENST00000578131; ENST00000578747; ENST00000579371; ENST00000580740; ENST00000580791; ENST00000580796; ENST00000580809; ENST00000580844; ENST00000581607; EN…	chr17	-	Multiple_Complex	10	17q22
		septin 6	TC0X00010643.hg.1	2017-09-06		15.2845	15.3582	15.5192	15.1192	15.3634	15.5437	0.764759	13.3116	13.281	13.8001	10.3391	9.93335	9.79113	9.89278	12.2092	12.1973	12.2457	12.8167	7.5536	8.37645	8.07306	7.95116	13.8863	13.5735	13.4736	13.5234	15.3478	15.3728	0.213037	0.12001	T	T	-1.01749	0.83781	0.955126	1.31e-20	6.69e-19	T	NM_015129; NM_145799; NM_145800; NM_145802; ENST00000343984; ENST00000354228; ENST00000354416; ENST00000360156; ENST00000394610; ENST00000460411; ENST00000467310; ENST00000481072; ENST00000489216; BC009291; BC011922; BC036240; BC069231; OTTHUMT00000058059; OTTHUMT00000058060; OTTHUMT00000058061; OTTHUMT00000058062; OTTHUMT00000058063; OTTHUMT00000058064; OTTHUMT00000058065; OTTHUMT00000058066	chrX	-	Multiple_Complex	10	Xq24
		septin 7	TC0700007178.hg.1	2017-09-07		12.395	12.6202	12.0632	12.8936	12.4089	12.4829	0.346591	9.70888	10.4605	10.5198	11.7856	11.8257	11.8439	11.5384	13.0582	12.95	13.1519	13.0193	12.9385	12.6659	13.0055	12.8264	13.2606	13.0804	13.2003	13.1607	12.4474	12.3699	0.261109	0.280188	T	T	1.05519	0.194169	0.546528	4.75e-13	2.06e-12	T	NM_001011553; NM_001242956; NM_001788; ENST00000350320; ENST00000399034; ENST00000399035; ENST00000425198; ENST00000432293; ENST00000435235; ENST00000473201; ENST00000475109; ENST00000485569; ENST00000492940; ENST00000493626; BC025987; BC067264; BC093640; BC093642; OTTHUMT00000338285; OTTHUMT00000338286; OTTHUMT00000338287; OTTHUMT00000338290; OTTHUMT00000338291; OTTHUMT00000338293; OTTHUMT000003…	chr7	+	Multiple_Complex	10	7p14.2
		septin 8	TC0500012025.hg.1	2017-09-08		9.59533	9.29938	9.17468	10.1924	9.2348	9.1327	0.673098	6.48514	4.74884	6.06956	9.71788	8.90944	8.25927	8.80106	7.71413	8.09592	8.34406	7.53763	8.05277	9.05048	8.96966	8.39933	9.23068	9.37325	9.45962	9.48221	9.18583	9.32425	0.584589	0.216057	T	T	-1.1007	0.621165	0.866093	9.58e-10	2.24e-09	T	NM_001098811; NM_001098812; NM_001098813; NM_001300798; NM_001300799; NM_015146; ENST00000296873; ENST00000371478; ENST00000371493; ENST00000378699; ENST00000378701; ENST00000378706; ENST00000378719; ENST00000378721; ENST00000414594; ENST00000448933; ENST00000453480; ENST00000458488; ENST00000481030; ENST00000481794; ENST00000492490; ENST00000620483; BC140759; BC171779; OTTHUMT00000132826; OTTHUM…	chr5	-	Multiple_Complex	10	5q31
		septin 9	TC1700008995.hg.1	2017-09-09		7.62555	8.38206	7.46623	8.51756	8.41517	8.11504	0.162887	7.57927	7.22495	8.96356	9.25274	9.69712	9.43321	9.54033	8.71477	8.74235	8.78509	8.89651	9.4032	9.17188	9.92874	9.64672	11.0819	10.6175	10.478	10.5453	8.40031	7.55331	0.209199	0.489291	T	T	1.79875	0.0342511	0.232429	4.07e-11	1.2e-10	T	NM_001113491; NM_001113492; NM_001113493; NM_001113494; NM_001113495; NM_001113496; NM_001293695; NM_001293696; NM_001293697; NM_001293698; NM_006640; ENST00000329047; ENST00000423034; ENST00000427177; ENST00000427180; ENST00000427674; ENST00000431235; ENST00000449803; ENST00000541152; ENST00000585638; ENST00000585929; ENST00000585930; ENST00000586128; ENST00000586433; ENST00000586456; ENST000005…	chr17	+	Multiple_Complex	10	17q25
		septin 10	TC0200013836.hg.1	2017-09-10		9.93489	9.80193	9.1906	10.6596	10.3465	10.0463	0.070761	7.17273	7.27651	7.00247	10.2364	10.1577	10.0351	10.0248	12.7229	12.9361	12.6788	12.6225	10.0244	10.0046	10.1695	10.1278	10.1498	10.2914	9.88642	10.2514	10.3499	9.8574	0.306663	0.39694	T	T	1.40691	0.00152908	0.0470717	1.92e-16	2e-15	T	NM_144710; NM_178584; NR_047585; ENST00000356688; ENST00000397712; ENST00000397714; ENST00000411469; ENST00000415095; ENST00000423520; ENST00000425498; ENST00000437928; ENST00000442746; ENST00000461295; ENST00000468616; ENST00000483047; ENST00000486678; ENST00000493445; BC020502; BC050345; OTTHUMT00000337804; OTTHUMT00000337805; OTTHUMT00000337806; OTTHUMT00000337807; OTTHUMT00000337808; OTTHUMT0…	chr2	-	Multiple_Complex	10	2q13
		septin 11	TC0400007913.hg.1	2017-09-11		9.83139	9.6794	9.95217	10.3873	9.2839	9.41107	0.740498	6.18319	7.71427	9.64214	9.91824	9.91416	9.94387	10.0309	7.20162	7.72851	7.58339	7.61402	8.97444	9.272	9.45473	9.0624	10.0814	10.2289	9.51647	10.504	9.35008	9.82352	0.603724	0.136682	T	T	-1.38841	0.623281	0.867064	2.9e-11	8.73e-11	T	NM_001306147; NM_018243; ENST00000264893; ENST00000502401; ENST00000502584; ENST00000504460; ENST00000504637; ENST00000505788; ENST00000506047; ENST00000506731; ENST00000510515; ENST00000510641; ENST00000512333; ENST00000512575; ENST00000512778; ENST00000513373; ENST00000513697; ENST00000515671; BC008083; BC063615; OTTHUMT00000362676; OTTHUMT00000362677; OTTHUMT00000362678; OTTHUMT00000362679; OT…	chr4	+	Multiple_Complex	10	4q21.1
		septin 12	TC1600009244.hg.1	2017-09-12		6.5319	6.89591	6.19351	6.77186	6.89731	6.58874	0.392736	7.89704	7.71342	7.02187	5.876	5.74873	6.06995	5.76032	12.4486	12.4092	12.0902	11.944	6.1674	6.17499	6.08572	5.95592	6.36459	5.58111	6.21239	6.55827	6.75822	6.53869	0.155181	0.351278	T	T	1.16435	0.355139	0.702248	7.78e-19	1.97e-17	T	NM_001154458; NM_144605; ENST00000268231; ENST00000396693; ENST00000587603; ENST00000588241; ENST00000590303; ENST00000590741; ENST00000591624; ENST00000591861; BC035619; OTTHUMT00000251645; OTTHUMT00000434537; OTTHUMT00000434538; OTTHUMT00000434539; OTTHUMT00000434540; OTTHUMT00000434541; OTTHUMT00000434542; OTTHUMT00000434543	chr16	-	Multiple_Complex	10	16p13.3
		septin 14	TC0700011156.hg.1	2017-09-14		4.08139	4.41847	3.33794	4.24368	3.99198	3.29139	0.820605	6.66068	4.58998	4.4826	3.5318	3.51188	3.40297	3.77061	10.1959	10.5234	10.0174	9.50142	4.17136	3.74475	3.98649	3.37774	3.92269	3.5515	3.68402	3.19514	3.94956	4.01461	0.493463	0.552854	F	F	-1.04612	0.729463	0.914645	8.17e-17	9.7e-16	F	NM_207366; ENST00000388975; ENST00000477628; OTTHUMT00000251489; OTTHUMT00000343102; uc003tqz.2	chr7	-	Multiple_Complex	10	7p11.2
		15 kDa selenoprotein; Salzman2013 ANNOTATED, CDS, coding, INTERNAL, OVCODE, OVEXON best transcript NM_004261; Transcript Identified by AceView, Entrez Gene ID(s) 9403, RefSeq ID(s) NM_203341; Transcript Identified by AceView, Entrez Gene ID(s) 9403, RefSeq ID(s) NM_004261; 15 kDa selenoprotein [Source:EntrezGene;Acc:9403]	TC0100014806.hg.1	2017-09-15		12.8372	13.3572	13.0854	13.1236	13.4017	13.3686	0.304375	12.6749	13.1899	13.9225	14.2023	14.4449	14.4718	14.2073	13.8245	13.8785	13.9406	13.9217	12.3986	12.3654	12.4912	12.6213	14.1279	14.0057	13.9472	13.7542	13.3845	13.0916	0.151912	0.260094	T	T	1.22508	0.23579	0.594414	3.88e-10	9.66e-10	T	NM_004261; NM_203341; ENST00000331835; ENST00000370554; ENST00000401030; ENST00000467557; ENST00000469566; ENST00000497861; ENST00000611507; ENST00000616787; BC005294; BC016359; BC021697; hsa_circ_0013087; hsa_circ_0013088; SEP15.dAug10; SEP15.fAug10; uc021oph.2; uc021opi.2; uc057ibz.1; uc057ica.1; uc057icb.1; uc057icc.1; uc057icd.1; uc057ice.1	chr1	-	Multiple_Complex	10	1p31
		deleted in esophageal cancer 1	TC0900008532.hg.1	2017-12-01		2.94033	3.83714	3.72772	3.34169	3.17086	3.87095	0.913914	3.72429	4.10862	3.86769	3.4354	3.12698	3.66729	3.24325	3.19527	2.94552	2.46809	3.31536	3.2526	3.52093	3.26693	3.55392	3.4156	3.04748	3.42021	3.27772	3.36059	3.7802	0.365017	0.489255	F	F	-1.33757	0.872348	0.966429	0.0716208	0.0743129	F	NM_017418; ENST00000374016; ENST00000477580; ENST00000484171; ENST00000614246; OTTHUMT00000053791; OTTHUMT00000053792; OTTHUMT00000053793; uc004bjk.1	chr9	+	Multiple_Complex	10	9q32
		APOBEC1 complementation factor	TC1000010642.hg.1	A1CF		4.09048	3.11744	3.22567	3.4008	3.14478	3.37819	0.622005	2.67575	4.64892	3.91267	14.1818	14.4985	14.2648	14.3583	2.93682	2.96731	3.19694	2.86312	3.50728	3.6918	3.36302	3.55644	3.36807	3.2217	3.2538	3.47867	3.38903	3.17376	0.141738	0.533294	F	F	1.16092	0.415187	0.745182	1.33e-25	1.24e-22	F	NM_001198818; NM_001198819; NM_001198820; NM_014576; NM_138932; NM_138933; ENST00000282641; ENST00000373993; ENST00000373995; ENST00000373997; ENST00000374001; ENST00000395489; ENST00000395495; ENST00000414883; ENST00000473480; ENST00000493415; BC130519; BC144196; OTTHUMT00000048085; OTTHUMT00000048086; OTTHUMT00000048087; OTTHUMT00000048088; OTTHUMT00000048089; OTTHUMT00000048090; OTTHUMT0000004…	chr10	-	Multiple_Complex	10	10q11.23
		Transcript Identified by AceView, Entrez Gene ID(s) 54715	TC1600006789.hg.1	A2BP1		4.16063	3.05449	3.62125	3.23797	3.17404	3.36796	0.338752	4.76429	3.69619	5.60355	3.76203	2.94316	3.53924	3.99968	3.54619	2.80336	3.54488	2.99343	4.02834	2.96441	4.7083	4.50251	3.79636	3.98963	3.11308	3.95264	3.25006	3.61395	0.0988175	0.553126	F	F	-1.28689	0.351587	0.699261	0.00362132	0.00408511	F	A2BP1.qAug10-unspliced	chr16	+	Unassigned	6
		Transcript Identified by AceView, Entrez Gene ID(s) 54715	TC1600006812.hg.1	A2BP1		3.09523	3.72612	3.66252	3.32887	3.32316	3.11919	0.325351	3.71193	3.24442	4.35068	3.93855	3.82571	3.05199	3.44267	3.52346	3.56798	2.98592	3.01495	5.38381	5.04	5.66923	5.52196	2.88143	3.3629	3.28544	3.21941	3.3259	3.69302	0.119445	0.347343	F	F	-1.28978	0.339979	0.691239	1.25e-08	2.49e-08	F	A2BP1.sAug10-unspliced	chr16	+	Unassigned	6
		Transcript Identified by AceView, Entrez Gene ID(s) 54715	TC1600006790.hg.1	A2BP1		4.1977	5.32616	4.23453	4.23608	4.02972	3.88268	0.234893	7.91192	6.47512	3.9596	4.43891	4.55145	3.95967	3.50262	3.23509	3.11658	3.61976	3.49645	4.66022	4.31204	4.43877	4.65026	3.89729	5.21173	4.16544	4.00323	4.04402	4.21687	0.177528	0.641149	F	F	-1.12728	0.111361	0.42256	6.28e-08	1.14e-07	F	A2BP1.tAug10-unspliced	chr16	+	Unassigned	6
		alpha-2-macroglobulin	TC1200009847.hg.1	A2M		12.2015	11.9121	11.1072	12.534	12.2095	12.1684	0.179748	9.68413	11.1197	11.5775	17.7338	17.7884	17.597	17.8802	11.6013	11.2636	11.1247	10.8597	12.7868	13.331	13.4377	13.3468	15.1299	14.8179	14.8103	14.9786	12.1898	11.8632	0.20028	0.566994	T	T	1.25409	0.0294152	0.218057	7.82e-19	1.98e-17	T	NM_000014; ENST00000318602; ENST00000404455; ENST00000462568; ENST00000467091; ENST00000472360; ENST00000495442; ENST00000495709; ENST00000497324; ENST00000539638; ENST00000542567; ENST00000543436; ENST00000545828; ENST00000546069; BC040071; OTTHUMT00000317233; OTTHUMT00000317236; OTTHUMT00000317237; OTTHUMT00000317238; OTTHUMT00000317239; OTTHUMT00000317240; OTTHUMT00000317241; OTTHUMT0000031724…	chr12	-	Multiple_Complex	10	12p13.31
		alpha-2-macroglobulin-like 1	TC1200006736.hg.1	A2ML1		3.66311	4.03219	3.2358	3.07542	3.92564	3.65078	0.797887	5.75021	3.35168	3.96338	3.76838	4.19644	3.63357	3.41218	4.93785	4.77377	4.96575	4.67815	3.89354	3.95737	4.20501	4.01733	3.87188	3.32224	4.21718	3.0928	3.59772	3.648	0.43387	0.39855	F	T	-1.03547	0.736531	0.917226	1.85e-05	2.56e-05	F	NM_001282424; NM_144670; ENST00000299698; ENST00000536789; ENST00000537475; ENST00000537546; ENST00000539547; ENST00000540049; ENST00000541459; ENST00000545692; ENST00000545850; OTTHUMT00000250304; OTTHUMT00000395845; OTTHUMT00000395846; OTTHUMT00000395957; OTTHUMT00000395958; OTTHUMT00000395959; OTTHUMT00000395960; OTTHUMT00000395961; OTTHUMT00000395963	chr12	+	Multiple_Complex	10	12p13.31
		alpha 1,3-galactosyltransferase 2	TC0100013650.hg.1	A3GALT2		4.0164	3.41214	3.58918	3.38494	3.36604	3.13441	0.1273	3.87775	3.63863	3.72951	3.09943	3.42426	3.86107	3.14365	3.16656	3.15731	3.3672	3.09564	3.54531	3.54595	2.991	3.11073	3.22342	3.31552	3.48183	3.22891	3.37511	3.62434	0.139508	0.310642	F	F	-1.18857	0.0898677	0.381537	0.171546	0.174815	F	NM_001080438; ENST00000442999; OTTHUMT00000011861	chr1	-	Coding	10	1p35.1
		alpha 1,4-galactosyltransferase	TC2200008888.hg.1	A4GALT		5.81001	5.74878	5.60984	6.32217	5.81951	6.30038	0.0716805	6.89952	7.4723	7.14214	6.91343	6.12524	6.2955	6.83307	6.04133	6.05507	6.15611	6.28097	6.82721	7.16595	7.37172	7.29157	7.36003	8.04212	7.63327	8.52913	6.31083	5.73656	0.28413	0.102568	T	T	1.48893	0.112427	0.424381	1.57e-07	2.71e-07	T	NM_017436; ENST00000249005; ENST00000381278; ENST00000401850; ENST00000465765; ENST00000483026; BC017068; BC055286; OTTHUMT00000319914; OTTHUMT00000319915; OTTHUMT00000319916; OTTHUMT00000319917; OTTHUMT00000319918	chr22	-	Multiple_Complex	10	22q13.2
		alpha-1,4-N-acetylglucosaminyltransferase	TC0300012566.hg.1	A4GNT		3.95726	3.37666	3.97364	3.63845	3.74257	3.34518	0.446097	4.45572	5.10172	3.32363	3.96064	3.88903	3.91901	4.25496	3.05915	2.63863	2.70088	2.92188	3.97826	2.99014	3.70527	3.71512	3.53143	3.37339	2.7726	3.4151	3.62138	3.96512	0.206061	0.340037	F	F	-1.26904	0.434285	0.758324	1.47e-05	2.05e-05	F	NM_016161; ENST00000236709; BC119639; BC119640; OTTHUMT00000357557; uc003ers.2	chr3	-	Coding	10	3p14.3
		achalasia, adrenocortical insufficiency, alacrimia	TC1200010798.hg.1	AAAS		11.6442	11.4626	12.06	11.5511	11.9104	11.936	0.740058	14.6613	14.5244	14.7417	11.169	10.6419	11.4249	11.0949	10.3311	10.8355	10.9731	10.8975	10.1064	9.86276	9.88609	9.77009	10.9994	10.9645	11.1494	10.6363	11.9227	11.6805	0.215186	0.306266	T	T	1.18275	0.731186	0.915452	2.48e-14	1.43e-13	T	NM_001173466; NM_015665; ENST00000209873; ENST00000394384; ENST00000546393; ENST00000546562; ENST00000546572; ENST00000547238; ENST00000547520; ENST00000547757; ENST00000547761; ENST00000548258; ENST00000548880; ENST00000548931; ENST00000549450; ENST00000549821; ENST00000549983; ENST00000550033; ENST00000550286; ENST00000551724; ENST00000552161; ENST00000552876; BC000659; OTTHUMT00000405632; OTTH…	chr12	-	Multiple_Complex	10	12q13
		acetoacetyl-CoA synthetase	TC1200009303.hg.1	AACS		7.79259	6.8403	8.16841	7.52771	7.15544	7.58424	0.691851	5.25372	5.22008	6.28086	7.60968	7.35646	8.19771	7.59759	9.37903	9.57098	9.12505	9.85081	7.17138	7.40119	7.40064	7.57607	7.30632	6.8879	6.77418	7.00416	7.55482	7.71998	0.23297	0.684589	T	T	-1.12129	0.524235	0.81206	2.06e-10	5.36e-10	T	NM_023928; ENST00000316519; ENST00000316543; ENST00000398953; ENST00000418937; ENST00000441247; ENST00000536118; ENST00000537477; ENST00000537564; ENST00000538851; ENST00000539251; ENST00000543665; ENST00000545511; BC040490; BC041000; BC051862; OTTHUMT00000400202; OTTHUMT00000400204; OTTHUMT00000400206; OTTHUMT00000400207; OTTHUMT00000400208; OTTHUMT00000400209; OTTHUMT00000400210; OTTHUMT0000040…	chr12	+	Multiple_Complex	10	12q24.31
		acetoacetyl-CoA synthetase pseudogene 1	TC0500013029.hg.1	AACSP1		6.69819	6.55581	5.79649	5.67697	6.2074	6.78084	0.777158	6.15272	6.40698	6.25369	6.13538	5.17756	5.99563	6.00571	6.30886	6.61924	5.6189	6.40816	6.18536	5.32561	5.21758	5.24112	5.54978	5.32712	5.72302	5.57019	6.21879	6.6241	0.552075	0.484751	T	T	-1.32437	0.696181	0.902053	0.0557881	0.0582061	T	NR_024035; BC140764	chr5	-	Multiple_Complex	10	5q35.3
		arylacetamide deacetylase	TC0300009192.hg.1	AADAC		6.84079	8.309	5.02035	9.21936	9.22824	9.55331	0.0526517	6.93983	9.10719	11.1642	11.6494	11.278	11.3005	11.2608	3.42632	3.51025	3.80831	4.19124	5.42128	4.93659	4.47036	5.38794	4.91218	4.72243	4.87062	3.8094	9.22398	6.75146	0.190295	1.64747	T	T	5.55012	2.16e-05	0.00496354	6.7e-14	3.51e-13	T	NM_001086; ENST00000232892; ENST00000488869; BC032309; OTTHUMT00000357883; OTTHUMT00000357884	chr3	+	Coding	10	3q25.1
		arylacetamide deacetylase-like 2	TC0300009189.hg.1	AADACL2		3.4796	4.60067	3.63066	3.8408	3.60678	4.20466	0.962584	4.18262	3.59966	4.44574	4.11545	3.3683	3.55615	3.97912	2.98745	3.23467	3.66286	3.33473	3.56687	3.92503	3.48397	3.91617	3.70877	3.67466	3.39006	3.47558	3.87047	3.55821	0.301281	0.60835	F	F	1.24165	0.941643	0.98615	0.0845551	0.0874247	F	NM_207365; ENST00000356517; ENST00000445270; BC065724; OTTHUMT00000342288; OTTHUMT00000342289	chr3	+	Coding	10	3q25.1
		arylacetamide deacetylase-like 3	TC0100006903.hg.1	AADACL3		5.31763	4.48565	4.75798	4.98718	4.89434	4.79414	0.886673	3.75728	6.81637	6.38284	5.81513	4.45956	4.92453	4.10149	3.46522	4.19106	4.10117	3.69337	4.98893	3.96618	3.33502	4.41334	4.66798	4.33637	4.45287	4.31573	4.89239	4.80988	0.0965436	0.424178	T	T	1.05886	0.918166	0.979429	6.3e-05	8.27e-05	T	NM_001103170; NR_111984; ENST00000359318; ENST00000620146; OTTHUMT00000005323; OTTHUMT00000005324	chr1	+	Multiple_Complex	10	1p36.21
		arylacetamide deacetylase-like 4	TC0100006900.hg.1	AADACL4		3.7205	3.47703	3.52111	3.73515	3.9634	3.25163	0.746485	3.7083	5.05706	3.65554	3.25688	3.32793	4.07636	3.54841	3.16556	3.34701	3.2232	3.31272	4.37213	3.87861	3.20585	4.15607	3.43859	3.27582	3.61853	3.52389	3.69076	3.50372	0.363434	0.129729	F	F	1.13843	0.7633	0.925949	0.0049226	0.00549609	F	NM_001013630; ENST00000376221; OTTHUMT00000005328; uc001auf.3	chr1	+	Coding	10	1p36.21
		aminoadipate aminotransferase	TC0400012396.hg.1	AADAT		5.16773	4.67611	5.16783	6.4148	4.27083	4.30135	0.991525	10.3604	9.57935	8.55586	7.72757	7.86454	7.87599	7.24531	6.33255	6.2584	6.03649	6.88063	5.09884	4.88492	4.94722	5.35839	4.75327	4.87858	5.33323	5.05485	4.28671	5.16778	1.22911	0.283866	T	T	-1.84174	0.982744	0.995875	4.37e-11	1.28e-10	T	NM_001286682; NM_001286683; NM_016228; NM_182662; ENST00000337664; ENST00000353187; ENST00000502392; ENST00000505906; ENST00000507375; ENST00000509167; ENST00000510340; ENST00000515480; BC031068; OTTHUMT00000362921; OTTHUMT00000362928; OTTHUMT00000362951; OTTHUMT00000362952; OTTHUMT00000362953; OTTHUMT00000362954; OTTHUMT00000362955; OTTHUMT00000362956	chr4	-	Multiple_Complex	10	4q33
		AhpC/TSA antioxidant enzyme domain containing 1	TC0900010920.hg.1	AAED1		7.28599	7.60226	7.44277	8.21114	7.37408	7.74747	0.266452	6.55011	5.67238	6.92814	8.37329	8.35307	8.22285	8.35713	7.50041	7.84202	7.63078	7.33598	10.6121	10.5285	10.5663	10.6183	8.45262	8.73992	8.81735	8.7632	7.77035	7.4435	0.41934	0.158137	T	T	1.25428	0.0938316	0.390246	5.04e-15	3.46e-14	T	NM_153698; ENST00000375234; ENST00000411939; ENST00000446045; ENST00000464512; BC136501; BC136503; OTTHUMT00000053272; OTTHUMT00000053273; OTTHUMT00000053274; OTTHUMT00000053275	chr9	-	Multiple_Complex	10	9q22.32
		Transcript Identified by AceView, Entrez Gene ID(s) 79719	TC1500009846.hg.1	AAGAB		6.89739	5.84744	5.38371	5.57362	4.85018	6.18057	0.437887	7.82147	8.25767	8.68825	6.02592	5.31135	6.18747	5.38625	5.95045	5.48675	5.50407	5.36854	6.50155	6.32431	5.85176	6.37307	5.69175	6.59702	5.26735	6.15899	5.54367	5.93992	0.666044	0.775529	T	T	-1.31608	0.188543	0.540696	7.12e-06	1.03e-05	T	AAGAB.mAug10-unspliced	chr15	-	Unassigned	6
		alpha- and gamma-adaptin binding protein	TC1500009845.hg.1	AAGAB		9.61458	9.52096	9.77845	9.83578	9.43764	9.22679	0.515874	7.71743	7.74429	7.51706	9.21147	8.59861	8.92055	9.03025	9.49769	9.36877	9.33612	9.47413	9.44436	9.52939	9.38833	9.62719	9.37919	9.1413	8.81792	8.97572	9.47467	9.6294	0.309258	0.130332	T	T	-1.11322	0.47879	0.788248	1.92e-08	3.73e-08	T	NM_001271885; NM_001271886; NM_024666; ENST00000261880; ENST00000538028; ENST00000542650; ENST00000558725; ENST00000560362; ENST00000561229; ENST00000561452; BC047026; BC058886; OTTHUMT00000417472; OTTHUMT00000417473; OTTHUMT00000417474; OTTHUMT00000417475; OTTHUMT00000417476; OTTHUMT00000417477; OTTHUMT00000417478	chr15	-	Multiple_Complex	10	15q23
		AP2 associated kinase 1	TC0200012961.hg.1	AAK1		11.5976	11.6496	12.2662	11.0955	11.2228	11.5724	0.103821	9.68846	10.05	10.6821	8.57326	9.34003	8.41868	8.86102	9.16214	9.23627	9.39892	9.08697	10.1639	9.84142	10.3651	10.0545	10.5808	10.2829	10.4995	10.6425	11.2448	11.6247	0.24692	0.371933	T	T	-1.30122	0.0267524	0.206069	2.55e-11	7.77e-11	T	NM_014911; ENST00000406297; ENST00000409068; ENST00000409085; ENST00000461002; ENST00000470281; ENST00000471775; ENST00000489327; ENST00000492192; ENST00000495239; ENST00000495836; ENST00000606389; ENST00000623317; ENST00000624900; BC104842; BC111965; BC143710; OTTHUMT00000251847; OTTHUMT00000327273; OTTHUMT00000327344; OTTHUMT00000327346; OTTHUMT00000327347; OTTHUMT00000327348; OTTHUMT0000032734…	chr2	-	Multiple_Complex	10	2p14
		adipogenesis associated, Mth938 domain containing	TC1100008541.hg.1	AAMDC		10.4604	11.6012	10.4736	11.2649	11.5119	11.5976	0.191998	14.3429	14.2005	15.4704	7.8513	7.95503	8.16909	9.02288	8.38766	8.69799	8.41729	8.35484	9.92704	9.59221	9.96375	9.9233	8.00688	8.00048	8.33578	8.45403	11.4987	10.4673	0.172743	0.65486	T	T	2.04403	0.0410134	0.25544	2.82e-16	2.79e-15	T	NM_024684; ENST00000304716; ENST00000393427; ENST00000525034; ENST00000525409; ENST00000526164; ENST00000526415; ENST00000527134; ENST00000529666; ENST00000531855; ENST00000532481; ENST00000533193; ENST00000630098; BC002752; BC016854; OTTHUMT00000390974; OTTHUMT00000390975; OTTHUMT00000390976; OTTHUMT00000390977; OTTHUMT00000390978; OTTHUMT00000390979; OTTHUMT00000390980; OTTHUMT00000390981; OTTH…	chr11	+	Multiple_Complex	10	11q14.1
		angio-associated migratory cell protein	TC0200015720.hg.1	AAMP		6.61713	6.30138	6.66566	6.47437	6.26622	6.78435	0.92181	4.19432	4.02583	4.77024	6.90726	6.74957	7.76305	7.08707	6.43869	6.60506	6.60736	6.19285	6.25361	5.69775	7.17962	6.44181	5.78349	5.26455	5.33543	5.87061	6.49821	6.64041	0.260727	0.197802	T	T	-1.10359	0.947257	0.987694	1.31e-07	2.29e-07	T	NM_001087; NM_001302545; ENST00000248450; ENST00000420660; ENST00000422731; ENST00000444053; ENST00000447885; ENST00000461911; ENST00000465442; ENST00000475678; ENST00000489767; ENST00000494720; BC039866; OTTHUMT00000338756; OTTHUMT00000338757; OTTHUMT00000338758; OTTHUMT00000338759; OTTHUMT00000338760; OTTHUMT00000338761; OTTHUMT00000338762; OTTHUMT00000338763; OTTHUMT00000338764; OTTHUMT0000033…	chr2	-	Multiple_Complex	10	2q35
		aralkylamine N-acetyltransferase	TC1700008946.hg.1	AANAT		5.07175	4.35891	4.72845	5.29261	4.41385	4.64077	0.860324	4.47935	4.40805	4.23874	4.61256	4.65962	5.35034	4.80845	4.31609	4.56592	4.61051	4.30525	5.57523	4.85755	4.3709	5.22194	4.48338	4.56089	4.71319	4.33473	4.67598	4.72149	0.456181	0.3565	F	F	-1.03205	0.822159	0.949245	0.282066	0.285245	F	NM_001088; NM_001166579; NR_110548; ENST00000250615; ENST00000392492; ENST00000585649; ENST00000587798; BC069434; BC092430; BC126332; BC126334; OTTHUMT00000450129; OTTHUMT00000450130; OTTHUMT00000450131; OTTHUMT00000450132; uc021udg.1	chr17	+	Multiple_Complex	10	17q25.1
		AAR2 splicing factor homolog	TC2000007243.hg.1	AAR2		11.1702	11.3813	11.4278	10.6148	11.027	11.4349	0.294601	9.19548	10.0786	12.0223	10.827	10.5859	10.9555	11.3182	10.6259	10.8577	10.8101	10.7433	10.7672	10.0291	10.6321	10.8956	11.1305	10.7309	11.1019	11.0122	11.0258	11.3997	0.410072	0.137307	T	T	-1.29587	0.208353	0.563738	1.7e-05	2.36e-05	T	NM_001271874; NM_015511; ENST00000320849; ENST00000373932; ENST00000397286; BC001751; BC019311; OTTHUMT00000079001; OTTHUMT00000276151; OTTHUMT00000276152	chr20	+	Multiple_Complex	10	20pter-q12
		alanine and arginine rich domain containing protein	TC0800008631.hg.1	AARD		7.34722	6.6373	6.03149	6.06193	6.20247	6.59332	0.401863	4.49677	5.92046	6.28109	5.02696	5.36271	5.4226	5.33514	8.78873	7.93712	7.51139	7.12328	5.81581	5.8165	5.65528	6.00321	6.13258	5.43208	5.70803	5.34812	6.22621	6.66422	0.275345	0.658551	T	T	-1.35473	0.255442	0.614595	2.77e-07	4.66e-07	T	NM_001025357; ENST00000378279; ENST00000523536; BC140924; BC142621; OTTHUMT00000381195; OTTHUMT00000381196	chr8	+	Multiple_Complex	10	8q24.11
		alanyl-tRNA synthetase	TC1600010752.hg.1	AARS		12.5776	12.4623	12.6327	11.811	12.0923	12.3273	0.0379198	10.3496	9.90055	11.1849	12.4268	12.2808	12.2831	12.1176	9.99904	10.2457	10.3469	10.5274	11.2462	11.6334	11.6434	11.596	10.6448	10.7234	10.7998	10.6955	12.0804	12.567	0.258469	0.0869738	T	T	-1.40111	0.0123054	0.140237	1.75e-12	6.71e-12	T	NM_001605; ENST00000261772; ENST00000564359; ENST00000565361; ENST00000566969; ENST00000567490; ENST00000569790; ENST00000569825; BC011451; OTTHUMT00000435021; OTTHUMT00000435022; OTTHUMT00000435023; OTTHUMT00000435024; OTTHUMT00000435025; OTTHUMT00000435026; OTTHUMT00000435027	chr16	-	Multiple_Complex	10	16q22
		alanyl-tRNA synthetase 2, mitochondrial	TC0600011915.hg.1	AARS2		3.99143	4.44058	4.26673	4.27958	4.73099	4.02677	0.667676	4.42078	3.80266	3.3936	3.74259	4.30306	4.20125	4.04012	3.7341	3.77887	3.8327	4.07425	3.01218	3.79354	3.90247	3.27882	4.19802	3.6736	4.4446	3.57594	4.32082	4.2438	0.356747	0.226476	T	F	1.05484	0.666922	0.889225	0.0299475	0.031727	F	NM_020745; ENST00000244571; ENST00000491573; BC131728; OTTHUMT00000040741; OTTHUMT00000040742	chr6	-	Multiple_Complex	10	6p21.1
		aminoadipate-semialdehyde dehydrogenase	TC0400010768.hg.1	AASDH		7.96474	7.67096	7.62457	7.68396	7.47036	7.80938	0.533845	5.49033	6.58857	5.75343	7.51381	7.79679	7.25389	7.16051	6.31776	6.4788	6.49679	6.33495	7.20465	5.82643	6.62029	6.71138	7.33273	7.35908	6.99697	7.39546	7.66497	7.64871	0.171411	0.18447	T	T	1.01133	0.693868	0.900907	5.65e-07	9.16e-07	T	NM_001286668; NM_001286669; NM_001286670; NM_001286671; NM_001286672; NM_181806; ENST00000205214; ENST00000451613; ENST00000502617; ENST00000503808; ENST00000510012; ENST00000510762; ENST00000513376; ENST00000514745; ENST00000514796; ENST00000602986; BC141824; BC142709; OTTHUMT00000250780; OTTHUMT00000362430; OTTHUMT00000362431; OTTHUMT00000362432; OTTHUMT00000362433; OTTHUMT00000362434; OTTHUMT0…	chr4	-	Multiple_Complex	10	4q12
		aminoadipate-semialdehyde dehydrogenase-phosphopantetheinyl transferase	TC1100008955.hg.1	AASDHPPT		9.32496	9.19266	9.6953	9.44669	9.58702	9.31663	0.800318	9.62155	10.247	10.0907	9.49304	8.90039	9.34304	9.27891	9.80539	9.77123	10.2805	9.58726	9.20729	9.22897	8.93057	9.2262	8.98468	8.88265	8.73366	8.68401	9.44941	9.34698	0.135227	0.260545	T	T	1.07358	0.819999	0.94877	4.9e-05	6.5e-05	T	NM_015423; ENST00000278618; ENST00000524411; ENST00000525660; ENST00000533423; ENST00000534152; BC015470; BC016728; OTTHUMT00000388732; OTTHUMT00000388733; OTTHUMT00000388734; OTTHUMT00000388735; OTTHUMT00000388736	chr11	+	Multiple_Complex	10	11q22
		aminoadipate-semialdehyde synthase	TC0700012439.hg.1	AASS		10.0061	9.35356	9.68714	8.86532	9.9104	10.0673	0.879832	8.61526	9.03225	8.08572	9.71782	9.32819	9.29466	9.72197	7.59422	7.41019	7.82254	7.73854	7.50745	7.45073	7.38341	7.79375	8.43412	8.22749	7.48467	7.96633	9.98564	9.68322	0.653387	0.326277	T	T	1.2332	0.806542	0.942598	6.87e-09	1.41e-08	T	NM_005763; ENST00000358954; ENST00000393376; ENST00000417368; ENST00000426162; ENST00000431170; ENST00000460376; ENST00000473553; OTTHUMT00000347298; OTTHUMT00000347299; OTTHUMT00000347300; OTTHUMT00000347301; OTTHUMT00000347302; OTTHUMT00000347303; OTTHUMT00000347304	chr7	-	Multiple_Complex	10	7q31.3
		apoptosis antagonizing transcription factor	TC1700007658.hg.1	AATF		10.5478	10.7179	11.0814	9.21546	10.1116	10.3734	0.0833294	9.04988	9.348	10.5157	9.29414	9.38275	9.16308	9.53616	10.3595	10.7309	10.1851	10.1798	10.9228	10.8854	11.0755	10.9625	10.2819	10.2488	9.85898	10.3197	10.1062	10.7511	0.607233	0.272562	T	T	-1.56369	0.00121575	0.0415874	9.57e-07	1.51e-06	T	NM_012138; ENST00000610798; ENST00000613840; ENST00000615319; ENST00000616062; ENST00000616392; ENST00000616434; ENST00000617141; ENST00000619387; ENST00000622432; BC000591; OTTHUMT00000477299; OTTHUMT00000477300; OTTHUMT00000477301; OTTHUMT00000477302; OTTHUMT00000477303; OTTHUMT00000477304; OTTHUMT00000477305; OTTHUMT00000477306; OTTHUMT00000477307; uc002hni.3	chr17	+	Multiple_Complex	10	17q12
		apoptosis-associated tyrosine kinase	TC1700012015.hg.1	AATK		7.65002	7.21081	7.33085	7.65446	7.34185	6.95246	0.754432	7.51611	8.3579	7.08582	6.84872	6.49722	7.25446	7.13187	6.69351	5.925	6.55425	6.74247	8.05589	7.36819	7.34189	7.58618	7.31314	7.55968	7.41624	7.2578	7.32241	7.35285	0.351699	0.227004	T	T	-1.02132	0.748305	0.920911	0.000264272	0.000328415	T	NM_001080395; NM_004920; ENST00000326724; ENST00000374792; ENST00000417379; ENST00000570932; ENST00000572339; ENST00000572798; ENST00000573441; ENST00000573469; ENST00000575363; ENST00000576053; OTTHUMT00000256055; OTTHUMT00000256056; OTTHUMT00000439037; OTTHUMT00000439038; OTTHUMT00000439039; OTTHUMT00000439040; OTTHUMT00000439041; OTTHUMT00000439042; OTTHUMT00000439043; OTTHUMT00000439044	chr17	-	Multiple_Complex	10	17q25.3
		4-aminobutyrate aminotransferase	TC1600006826.hg.1	ABAT		6.10215	6.90567	5.45683	7.24573	6.59169	6.91038	0.173121	6.2158	6.09612	7.26651	9.48623	9.8687	9.93323	9.3621	5.79997	5.60782	6.54804	5.25738	4.40365	4.94041	4.20693	5.1097	4.58236	4.61524	4.59725	4.98456	6.91482	6.14221	0.327055	0.725858	T	T	1.70836	0.0307102	0.221551	1e-12	4.03e-12	T	NM_000663; NM_001127448; NM_020686; ENST00000268251; ENST00000396600; ENST00000425191; ENST00000561870; ENST00000562115; ENST00000563215; ENST00000563992; ENST00000564453; ENST00000564714; ENST00000565016; ENST00000565671; ENST00000566590; ENST00000567812; ENST00000568847; ENST00000569156; ENST00000569695; BC015628; BC031413; OTTHUMT00000109648; OTTHUMT00000433612; OTTHUMT00000433613; OTTHUMT0000…	chr16	+	Multiple_Complex	10	16p13.2
		ATP binding cassette subfamily A member 1	TC0900011072.hg.1	ABCA1		13.5823	13.3146	13.3332	11.8338	12.7479	12.6663	0.0309592	14.325	14.4464	14.672	13.229	13.2959	13.1324	13.2032	9.3996	9.19142	9.05629	9.26944	9.18028	9.51585	9.26656	9.43509	11.4822	11.3337	11.4184	11.344	12.7054	13.3243	0.505828	0.149513	T	T	-1.53563	4.49e-05	0.00721933	9.67e-19	2.35e-17	T	NM_005502; ENST00000374733; ENST00000374736; ENST00000423487; ENST00000494467; BC146856; OTTHUMT00000053491; OTTHUMT00000053492; OTTHUMT00000053493; OTTHUMT00000053494	chr9	-	Multiple_Complex	10	9q31.1
		ATP binding cassette subfamily A member 10	TC1700012459.hg.1	ABCA10		4.5124	4.03631	3.36078	4.66688	3.59408	3.46589	0.910134	5.42545	3.89861	3.81398	4.31632	4.1151	3.89017	3.31794	5.28865	5.3397	5.11908	5.17296	4.87255	4.68537	5.12752	4.32294	3.59104	4.36082	3.97242	4.56236	3.5326	3.98848	0.659509	0.578681	F	F	-1.37162	0.854617	0.961206	0.000517525	0.000624677	F	NM_080282; ENST00000269081; ENST00000518929; ENST00000519732; ENST00000521526; ENST00000521538; ENST00000522406; ENST00000522787; ENST00000523419; ENST00000523512; ENST00000524231; ENST00000524273; ENST00000588514; OTTHUMT00000379881; OTTHUMT00000379993; OTTHUMT00000379994; OTTHUMT00000379995; OTTHUMT00000379997; OTTHUMT00000379998; OTTHUMT00000379999; OTTHUMT00000380000; OTTHUMT00000380001; OTTH…	chr17	-	Multiple_Complex	10	17q24
		ATP binding cassette subfamily A member 12	TC0200015645.hg.1	ABCA12		3.37255	2.76224	3.15978	4.2509	2.69562	2.90933	0.736498	5.18932	4.11029	3.79426	3.12483	3.65182	3.78795	3.01509	4.93615	4.87224	5.19027	4.58211	3.1901	2.55005	2.92393	3.42378	2.86329	2.58992	2.88536	2.9107	2.80683	3.12289	0.843048	0.309781	F	F	-1.24492	0.557831	0.82936	1.52e-06	2.35e-06	F	NM_015657; NM_173076; NR_103740; ENST00000272895; ENST00000389661; ENST00000412081; OTTHUMT00000337109; OTTHUMT00000337110; OTTHUMT00000337111; uc002vew.3	chr2	-	Multiple_Complex	10	2q34
		ATP binding cassette subfamily A member 13	TC0700007479.hg.1	ABCA13		3.52467	3.41018	4.10432	3.46343	3.57671	4.3675	0.747739	3.8635	4.37522	4.86198	3.4229	3.49658	4.39709	4.67505	6.74848	6.93648	6.43804	6.21458	4.03176	3.75073	4.24977	5.12961	3.66965	4.0744	3.78875	4.09016	3.52238	3.46976	0.492531	0.372141	F	F	1.03715	0.727332	0.913713	1.1e-07	1.94e-07	F	NM_152701; ENST00000411975; ENST00000417403; ENST00000435451; ENST00000435803; ENST00000453246; ENST00000484268; ENST00000544596; ENST00000611776; OTTHUMT00000341964; OTTHUMT00000341965; OTTHUMT00000341966; OTTHUMT00000341967; OTTHUMT00000341968; OTTHUMT00000341969; OTTHUMT00000476349; OTTHUMT00000476350; uc003toq.2	chr7	+	Multiple_Complex	10	7p12.3
		Memczak2013 ALT_ACCEPTOR, ALT_DONOR, coding, INTERNAL, intronic best transcript NM_152701	TC0700007480.hg.1	ABCA13		4.04818	4.25109	3.77387	5.15151	4.48332	3.78077	0.345901	3.50891	4.80883	3.91479	5.06576	4.96614	4.77809	3.9204	5.49822	5.25379	4.39071	3.78905	5.85285	5.62234	4.38432	3.92358	3.84613	4.7571	5.46447	4.6577	4.47415	4.03068	0.685442	0.239499	T	F	1.35988	0.377983	0.719592	0.392839	0.39555	F	hsa_circ_0001707	chr7	+	NonCoding	6
		ATP binding cassette subfamily A member 2	TC0900012025.hg.1	ABCA2		7.15919	7.07476	7.08953	7.90133	7.03299	7.3134	0.297069	6.70493	7.27048	7.00946	7.06283	7.33078	7.04869	7.09841	6.6338	6.86522	6.82697	6.20801	7.58028	7.28096	7.08109	6.94328	7.07639	7.10188	7.02935	7.07753	7.36759	7.08295	0.443153	0.0450909	T	T	1.21811	0.16388	0.50808	0.0376874	0.0396974	T	NM_001606; NM_212533; ENST00000265662; ENST00000341511; ENST00000371605; ENST00000398207; ENST00000425423; ENST00000431584; ENST00000437791; ENST00000459850; ENST00000463603; ENST00000464157; ENST00000464520; ENST00000464876; ENST00000466707; ENST00000467624; ENST00000470535; ENST00000476211; ENST00000479446; ENST00000487109; ENST00000488535; ENST00000490486; ENST00000492260; ENST00000494046; ENS…	chr9	-	Multiple_Complex	10	9q34
		ATP binding cassette subfamily A member 3	TC1600009105.hg.1	ABCA3		6.49166	7.23343	6.43624	6.96768	7.39639	6.5997	0.481469	6.82449	5.7979	6.81627	5.33301	5.4432	5.28704	5.54825	6.73387	6.3604	6.40202	6.56558	6.04965	6.04519	6.38912	6.60473	5.97949	6.29152	5.97712	5.97822	6.98341	6.46508	0.398731	0.445123	T	T	1.4323	0.250599	0.609487	6.13e-06	8.92e-06	T	NM_001089; ENST00000301732; ENST00000382381; ENST00000563623; ENST00000566200; ENST00000567910; ENST00000569062; BC140895; BC146866; BC151840; OTTHUMT00000250784; OTTHUMT00000435440; OTTHUMT00000435441; OTTHUMT00000435442; OTTHUMT00000435443; OTTHUMT00000435444	chr16	-	Multiple_Complex	10	16p13.3
		ATP binding cassette subfamily A member 4	TC0100014977.hg.1	ABCA4		5.07857	4.24329	4.29585	4.00535	4.68279	3.93107	0.408431	5.40565	4.61422	3.19529	4.63584	4.53407	4.82334	4.749	4.108	4.05254	4.53359	4.23905	4.5737	4.34043	4.37912	4.18169	4.03255	4.33446	4.52602	3.58714	3.96972	4.27064	0.414231	0.467815	T	T	-1.23193	0.200279	0.553119	0.00244197	0.00279171	T	NM_000350; ENST00000370225; ENST00000460514; ENST00000465352; ENST00000470771; ENST00000472033; ENST00000484388; ENST00000536513; OTTHUMT00000029320; OTTHUMT00000029321; OTTHUMT00000029322; OTTHUMT00000029323; OTTHUMT00000029324; OTTHUMT00000029325	chr1	-	Multiple_Complex	10	1p22
		ATP binding cassette subfamily A member 5	TC1700012460.hg.1	ABCA5		10.6384	9.58101	9.82786	9.93126	9.77481	9.47132	0.450062	12.4772	11.9664	11.009	11.4407	11.2874	11.599	11.2579	9.07196	9.31416	9.27795	9.282	12.4359	12.3971	12.3073	12.3961	7.33382	7.52435	7.3467	7.40649	9.7465	9.84333	0.233854	0.55317	T	T	-1.06943	0.176355	0.527055	4.99e-17	6.42e-16	T	NM_018672; NM_172232; ENST00000392676; ENST00000586601; ENST00000586811; ENST00000586995; ENST00000587607; ENST00000588106; ENST00000588665; ENST00000588877; ENST00000589609; ENST00000589975; ENST00000591234; ENST00000592568; ENST00000593153; ENST00000593253; OTTHUMT00000450654; OTTHUMT00000450655; OTTHUMT00000450656; OTTHUMT00000450657; OTTHUMT00000450658; OTTHUMT00000450659; OTTHUMT00000450660;…	chr17	-	Multiple_Complex	10	17q24.3
		ATP binding cassette subfamily A member 6	TC1700011578.hg.1	ABCA6		6.96376	7.23681	6.84919	9.09764	8.22768	7.42958	0.0671964	7.42475	7.84488	6.24288	10.7222	10.4288	10.2215	10.4145	6.20731	6.474	6.57724	6.76067	9.0188	9.81662	9.58097	9.42158	7.39597	7.59358	7.61023	6.88589	8.24666	6.98659	0.834288	0.199136	T	T	2.39508	0.000450704	0.0249142	5.03e-12	1.76e-11	T	NM_080284; ENST00000284425; ENST00000446604; ENST00000589482; ENST00000589803; ENST00000590311; ENST00000590645; ENST00000592493; OTTHUMT00000450463; OTTHUMT00000450464; OTTHUMT00000450465; OTTHUMT00000450466; OTTHUMT00000450467; OTTHUMT00000450468; OTTHUMT00000450469	chr17	-	Multiple_Complex	10	17q24.3
		ATP binding cassette subfamily A member 7	TC1900006508.hg.1	ABCA7		7.82057	7.55832	7.52949	6.74842	7.50615	6.40818	0.0907949	7.63487	8.51006	7.75387	6.6428	6.1567	6.67893	6.0296	5.26805	5.28834	5.403	5.79	7.7713	7.32224	7.36974	7.11225	9.36108	9.03154	8.90554	8.84046	6.81603	7.54449	0.562058	0.160382	T	T	-1.65688	0.00738886	0.106718	1.43e-11	4.57e-11	T	NM_019112; ENST00000263094; ENST00000433129; ENST00000435683; ENST00000524383; ENST00000524850; ENST00000525073; ENST00000525238; ENST00000525939; ENST00000526885; ENST00000527496; ENST00000529442; ENST00000530092; ENST00000530703; ENST00000531467; ENST00000531478; ENST00000532194; ENST00000533574; ENST00000611490; ENST00000612569; OTTHUMT00000394993; OTTHUMT00000394994; OTTHUMT00000394995; OTTHU…	chr19	+	Multiple_Complex	10	19p13.3
		ATP binding cassette subfamily A member 8	TC1700011574.hg.1	ABCA8		11.9701	12.3303	11.3234	12.7868	12.5187	12.4498	0.0850129	11.0996	12.0418	11.9701	10.6923	10.9293	10.9524	10.7072	11.3774	11.6719	11.4087	11.1623	10.9548	10.7014	10.6897	10.7759	11.8561	11.4279	11.3491	11.3565	12.5083	11.9108	0.178	0.510179	T	T	1.513	0.00340086	0.0716519	2.31e-07	3.92e-07	T	NM_001288985; NM_001288986; NM_007168; ENST00000269080; ENST00000428549; ENST00000430352; ENST00000541225; ENST00000585531; ENST00000585850; ENST00000586292; ENST00000586539; ENST00000587206; ENST00000588458; ENST00000589533; ENST00000589980; ENST00000590359; ENST00000591459; ENST00000615593; BC130280; OTTHUMT00000450172; OTTHUMT00000450174; OTTHUMT00000450175; OTTHUMT00000450176; OTTHUMT00000450…	chr17	-	Multiple_Complex	10	17q24
		ATP binding cassette subfamily A member 9	TC1700011575.hg.1	ABCA9		7.66627	6.84809	6.94332	7.58225	7.4029	7.0843	0.529448	7.39014	7.34676	6.03464	5.82136	6.24276	6.56365	6.33262	7.34679	7.45665	7.15	7.65232	10.3819	9.29251	8.8352	9.38848	5.29322	6.12682	6.63216	5.82791	7.37386	6.89765	0.252199	0.447427	T	T	1.39109	0.54825	0.82418	3.25e-09	7e-09	T	NM_080283; ENST00000340001; ENST00000453985; ENST00000460872; ENST00000461623; ENST00000482072; ENST00000492580; ENST00000495634; ENST00000585714; OTTHUMT00000277072; OTTHUMT00000277073; OTTHUMT00000277074; OTTHUMT00000277075; OTTHUMT00000277076; OTTHUMT00000277077; OTTHUMT00000277078; OTTHUMT00000450462	chr17	-	Multiple_Complex	10	17q24.2
		ATP binding cassette subfamily B member 1	TC0700011706.hg.1	ABCB1		8.91855	8.79406	8.90203	8.57377	9.12473	8.23674	0.43571	8.65588	8.58977	9.51558	6.96495	7.06072	7.09253	6.67633	4.13478	4.60625	5.59134	5.54943	5.33652	5.74524	6.39154	6.27468	5.55167	6.19668	6.0583	5.93365	8.62116	8.90995	0.448269	0.0676119	T	T	-1.22162	0.49706	0.797234	8.6e-12	2.88e-11	T	NM_000927; ENST00000265724; ENST00000416177; ENST00000475929; ENST00000476862; ENST00000482527; ENST00000483831; ENST00000488737; ENST00000491360; ENST00000496821; ENST00000543898; ENST00000622132; BC130424; OTTHUMT00000335444; OTTHUMT00000335739; OTTHUMT00000335740; OTTHUMT00000335741; OTTHUMT00000335742; OTTHUMT00000335743; OTTHUMT00000335744; OTTHUMT00000335745; OTTHUMT00000335746	chr7	-	Multiple_Complex	10	7q21.12
		ATP binding cassette subfamily B member 10	TC0100017666.hg.1	ABCB10		6.75518	7.00409	7.33404	6.88999	7.30953	7.05346	0.810123	4.60753	5.59798	5.23422	7.91295	7.77793	7.91129	7.88718	5.54536	5.51231	5.15224	5.99384	7.80501	7.58102	8.03468	8.22054	7.29251	7.43297	7.27753	7.10589	7.07453	7.02412	0.211466	0.290374	T	T	1.03556	0.803248	0.941107	2.97e-12	1.09e-11	T	NM_012089; ENST00000344517; ENST00000486755; ENST00000498158; BC064930; OTTHUMT00000095240; OTTHUMT00000095241; OTTHUMT00000095242; uc001htp.4	chr1	-	Multiple_Complex	10	1q42.13
		ATP binding cassette subfamily B member 11	TC0200014848.hg.1	ABCB11		3.75213	3.09543	3.63768	2.8576	3.71317	3.14625	0.471957	4.13762	5.15942	3.61985	11.0529	11.2405	11.0736	10.9472	6.74656	6.98941	6.88847	7.70296	3.83393	3.53058	2.80927	3.35097	3.25208	2.87172	3.38304	3.37716	3.19914	3.68933	0.435262	0.350806	F	F	-1.40463	0.360973	0.707756	1.64e-19	5.43e-18	F	NM_003742; ENST00000263817; ENST00000439188; ENST00000478354; OTTHUMT00000333616; OTTHUMT00000333618; OTTHUMT00000333619	chr2	-	Multiple_Complex	10	2q24
		ATP binding cassette subfamily B member 4	TC0700011705.hg.1	ABCB4		13.0704	11.5808	13.2141	10.0537	11.6039	11.6044	0.104994	10.4105	6.78052	7.79049	15.3931	15.4967	15.2021	15.1676	5.92668	5.22589	6.56258	6.34586	7.77958	6.40928	7.04438	7.55035	8.35233	8.81308	8.37207	8.20274	11.6042	13.1393	0.895162	0.904358	T	T	-2.89823	0.00176891	0.0507974	2.91e-16	2.86e-15	T	NM_000443; NM_018849; NM_018850; ENST00000265723; ENST00000358400; ENST00000359206; ENST00000417608; ENST00000440025; ENST00000453593; ENST00000467079; ENST00000467983; ENST00000469770; ENST00000473795; BC042531; OTTHUMT00000158259; OTTHUMT00000253601; OTTHUMT00000334866; OTTHUMT00000336083; OTTHUMT00000339558; OTTHUMT00000339559; OTTHUMT00000339560; OTTHUMT00000339561; OTTHUMT00000345430; uc003u…	chr7	-	Multiple_Complex	10	7q21.1
		ATP binding cassette subfamily B member 5	TC0700006852.hg.1	ABCB5		5.02052	4.7992	5.06342	4.42328	4.93248	4.80992	0.241087	5.41984	5.51156	4.96503	4.24533	4.31901	4.65339	4.31376	4.99003	4.97754	5.54186	5.53835	6.04239	5.77017	5.68441	5.85596	4.03324	4.07707	4.35653	4.57351	4.79802	5.0411	0.265768	0.141795	F	T	-1.18352	0.260171	0.618853	3.54e-07	5.87e-07	F	NM_001163941; NM_001163942; NM_001163993; NM_178559; ENST00000258738; ENST00000404938; ENST00000406935; ENST00000441315; ENST00000443026; ENST00000477094; BC104894; BC104920; OTTHUMT00000211603; OTTHUMT00000326470; OTTHUMT00000326471; OTTHUMT00000326736; OTTHUMT00000326738; OTTHUMT00000326906; uc003suv.4	chr7	+	Multiple_Complex	10	7p21.1
		ATP binding cassette subfamily B member 6 (Langereis blood group)	TC0200016774.hg.1	ABCB6		6.44351	6.17252	6.6497	5.18714	5.89939	6.18366	0.111685	4.17697	5.25424	4.60312	7.63127	7.92796	7.75945	7.73867	7.07145	7.60427	7.29366	6.45271	7.16894	6.76154	7.1376	6.38271	4.93766	5.09125	5.11368	4.98941	5.844	6.42744	0.513349	0.239322	T	T	-1.49842	0.0212056	0.182731	1.45e-10	3.89e-10	T	NM_005689; ENST00000265316; ENST00000295750; ENST00000417678; ENST00000443805; ENST00000448398; ENST00000452545; ENST00000485773; ENST00000487380; ENST00000492543; ENST00000492953; ENST00000494639; ENST00000496984; ENST00000497882; BC000559; OTTHUMT00000256820; OTTHUMT00000336019; OTTHUMT00000336021; OTTHUMT00000336022; OTTHUMT00000336023; OTTHUMT00000336024; OTTHUMT00000336025; OTTHUMT0000033602…	chr2	-	Multiple_Complex	10	2q36
		ATP binding cassette subfamily B member 7	TC0X00010099.hg.1	ABCB7		8.37577	9.04514	8.73216	8.16825	8.83859	8.69026	0.616768	5.12004	6.90608	6.9308	7.76316	7.62247	8.42218	8.44619	6.0265	5.87358	5.72969	5.96976	7.14655	7.78057	7.78153	7.27257	7.57766	7.56011	7.60808	7.22515	8.69197	8.72084	0.352101	0.33492	T	T	-1.02021	0.549561	0.825083	9.29e-11	2.57e-10	T	NM_001271696; NM_001271697; NM_001271698; NM_001271699; NM_004299; ENST00000253577; ENST00000339447; ENST00000373394; ENST00000469368; ENST00000490858; ENST00000526404; ENST00000529949; ENST00000534524; ENST00000534570; ENST00000620875; BC006323; OTTHUMT00000057273; OTTHUMT00000057274; OTTHUMT00000057275; OTTHUMT00000057276; OTTHUMT00000394029; OTTHUMT00000394107; OTTHUMT00000394108; OTTHUMT00000…	chrX	-	Multiple_Complex	10	Xq13.3
		ATP binding cassette subfamily B member 8	TC0700009690.hg.1	ABCB8		5.37139	4.70822	5.552	5.08078	4.22199	5.01446	0.309462	6.44369	5.37977	5.07538	4.96656	5.69293	5.13205	5.24923	4.01879	3.83617	4.01645	3.57562	4.06538	4.60875	3.86542	3.92495	3.95198	4.40909	4.91228	3.7559	5.04627	5.3834	0.47783	0.444293	T	T	-1.26324	0.157001	0.497295	8.81e-06	1.26e-05	T	NM_001282291; NM_001282292; NM_001282293; NM_007188; ENST00000297504; ENST00000358849; ENST00000461373; ENST00000462605; ENST00000466514; ENST00000466956; ENST00000469410; ENST00000470645; ENST00000471796; ENST00000472698; ENST00000477092; ENST00000477719; ENST00000482309; ENST00000482899; ENST00000488370; ENST00000488551; ENST00000488826; ENST00000489192; ENST00000491920; ENST00000493338; ENST00…	chr7	+	Multiple_Complex	10	7q36
		ATP binding cassette subfamily B member 9	TC1200012256.hg.1	ABCB9		4.01195	4.09454	4.39817	4.47047	4.47683	3.64556	0.92664	4.66988	4.53643	3.75272	4.03267	4.11878	3.73035	4.57336	5.84409	5.96305	5.8462	5.51353	3.89286	3.53948	3.35588	3.97298	3.66866	3.84428	3.682	3.76211	4.47352	4.08893	0.478108	0.203379	T	F	1.30549	0.90219	0.973577	3.87e-08	7.24e-08	F	NM_001243013; NM_001243014; NM_019624; NM_019625; NM_203444; ENST00000280560; ENST00000344275; ENST00000346530; ENST00000392439; ENST00000426173; ENST00000442028; ENST00000442833; ENST00000536976; ENST00000537276; ENST00000538895; ENST00000540285; ENST00000540971; ENST00000541424; ENST00000541983; ENST00000542448; ENST00000542678; ENST00000543935; ENST00000545373; ENST00000546077; ENST00000546289…	chr12	-	Multiple_Complex	10	12q24
		Jeck2013 ALT_ACCEPTOR, ALT_DONOR, coding, INTERNAL, intronic best transcript NM_004996	TC1600007023.hg.1	ABCC1		4.54552	4.04696	5.00898	4.48314	4.71577	4.54929	0.872623	5.41903	5.66787	5.03463	3.54076	4.52551	4.13301	5.07577	2.95479	4.1201	4.29729	3.75434	4.38039	4.14781	4.42799	4.45677	4.59901	4.21572	4.23356	4.25459	4.56215	4.53621	0.119867	0.481117	F	F	1.01814	0.882028	0.969742	0.00641514	0.0071096	F	hsa_circ_0008681	chr16	+	NonCoding	6
		ATP binding cassette subfamily C member 1	TC1600007022.hg.1	ABCC1		9.20961	8.88058	9.38733	8.34529	9.02914	8.93229	0.207966	8.80894	7.13286	8.94094	7.88894	7.63022	8.02234	7.4769	10.3758	10.3045	10.3395	10.2895	9.84759	9.63551	9.66306	10.0878	10.3506	10.1276	10.1284	10.0247	8.97874	9.17915	0.370045	0.257112	T	T	-1.14902	0.0655782	0.32581	2.61e-12	9.66e-12	T	ENST00000399408; ENST00000399410; ENST00000572053; ENST00000572882; ENST00000574224; ENST00000574761; ENST00000575422; ENST00000576557; OTTHUMT00000109701; OTTHUMT00000436390; OTTHUMT00000436391; OTTHUMT00000436392; OTTHUMT00000436393; OTTHUMT00000436394; OTTHUMT00000436395	chr16	+	Multiple_Complex	10	16p13.1
		ATP binding cassette subfamily C member 10	TC0600008087.hg.1	ABCC10		6.79432	6.78135	6.89301	7.23816	7.24162	6.77783	0.171378	4.54444	6.19415	6.30057	6.55692	6.04895	6.83425	6.68749	5.74216	6.30619	6.22667	6.61487	8.36514	7.14711	7.30418	7.69184	6.70619	6.79455	6.34063	6.4662	7.23982	6.7881	0.266776	0.0610681	T	T	1.36767	0.345065	0.694339	3.05e-06	4.57e-06	T	NM_001198934; NM_033450; ENST00000244533; ENST00000372512; ENST00000372515; ENST00000372530; ENST00000437104; ENST00000443426; ENST00000463024; ENST00000469856; ENST00000502549; ENST00000505344; OTTHUMT00000040603; OTTHUMT00000040604; OTTHUMT00000040605; OTTHUMT00000040606; OTTHUMT00000040607; OTTHUMT00000040608; OTTHUMT00000358541; OTTHUMT00000358542; OTTHUMT00000358543; OTTHUMT00000358544; uc00…	chr6	+	Multiple_Complex	10	6p21.1
		ATP binding cassette subfamily C member 11	TC1600010216.hg.1	ABCC11		6.66016	6.82478	6.74497	7.40524	6.61742	6.79295	0.467563	6.84883	6.8522	6.95155	7.02945	7.48969	6.83759	7.43494	6.65678	6.16845	5.8886	6.2803	6.17135	5.6377	6.12505	6.21354	6.0723	5.95074	6.24584	6.61404	6.79277	6.74364	0.413596	0.0823226	T	T	1.03464	0.433535	0.75796	0.000318897	0.000393131	T	NM_032583; NM_033151; NM_145186; ENST00000353782; ENST00000356608; ENST00000394747; ENST00000394748; ENST00000565329; ENST00000565487; ENST00000567385; ENST00000569172; ENST00000569991; OTTHUMT00000256843; OTTHUMT00000256844; OTTHUMT00000429983; OTTHUMT00000429984; OTTHUMT00000429985; OTTHUMT00000429986; OTTHUMT00000429987; OTTHUMT00000429988; uc002eff.1; uc002efg.1	chr16	-	Multiple_Complex	10	16q12.1
		ATP binding cassette subfamily C member 12	TC1600010215.hg.1	ABCC12		5.8797	6.37708	6.54748	6.7617	7.14895	6.22051	0.257925	5.99432	6.01674	6.24373	6.43186	5.41115	6.82186	5.92106	7.55297	7.51814	7.22246	7.278	7.66646	5.75447	6.01042	6.71901	5.96143	6.13378	6.24928	5.83628	6.72452	6.35198	0.466342	0.346976	T	T	1.29463	0.253758	0.612354	0.0159461	0.0171883	T	NM_033226; ENST00000311303; ENST00000497206; ENST00000526251; ENST00000527640; ENST00000528693; ENST00000529084; ENST00000529504; ENST00000532355; ENST00000532494; ENST00000533185; ENST00000533639; ENST00000534418; OTTHUMT00000256837; OTTHUMT00000256838; OTTHUMT00000395184; OTTHUMT00000395185; OTTHUMT00000395186; OTTHUMT00000395187; OTTHUMT00000395188; OTTHUMT00000395189; OTTHUMT00000395190; OTTH…	chr16	-	Multiple_Complex	10	16q12.1
		ATP binding cassette subfamily C member 2	TC1000008628.hg.1	ABCC2		3.14612	3.06124	3.77288	3.00457	3.41722	3.39658	0.846604	4.37478	2.89234	3.56396	11.0339	10.9389	10.6592	11.1104	3.03495	3.39889	3.3034	3.15228	2.63406	3.59316	3.33675	3.21392	2.99875	3.11625	3.16292	3.00458	3.40648	3.10541	0.232515	0.388687	F	F	1.23206	0.812866	0.94549	2.88e-21	2e-19	F	NM_000392; ENST00000370434; ENST00000370449; ENST00000496621; BC136419; OTTHUMT00000049825; OTTHUMT00000049826; OTTHUMT00000049827	chr10	+	Multiple_Complex	10	10q24
		ATP binding cassette subfamily C member 3	TC1700008263.hg.1	ABCC3		8.71925	11.3522	6.31574	10.1754	11.0119	10.887	0.268795	13.0845	13.9329	14.5867	14.2275	14.4997	14.1856	14.0374	5.54852	5.45761	5.60567	5.67245	5.50457	4.09996	4.9158	4.66613	8.91047	8.67716	8.18183	8.77552	10.9469	8.77979	0.451218	2.51913	T	T	4.49115	0.00995653	0.124518	5.38e-13	2.3e-12	T	NM_001144070; NM_003786; ENST00000285238; ENST00000427699; ENST00000502426; ENST00000503304; ENST00000503337; ENST00000504586; ENST00000505699; ENST00000506464; ENST00000508929; ENST00000510633; ENST00000510891; ENST00000513511; ENST00000513589; ENST00000513745; ENST00000515070; ENST00000515585; ENST00000515707; ENST00000571855; BC137347; BC137348; OTTHUMT00000368083; OTTHUMT00000368084; OTTHUMT0…	chr17	+	Multiple_Complex	10	17q22
		ATP binding cassette subfamily C member 4	TC1300009505.hg.1	ABCC4		5.4527	5.11691	6.07753	6.28778	6.4077	5.66762	0.190275	7.10556	6.7443	6.42811	6.38347	6.76462	6.43612	6.44942	7.0226	7.11823	7.64224	7.75671	8.28149	9.24075	9.35377	9.30782	7.32527	7.12267	7.43736	7.43092	6.34529	5.51062	0.397219	0.487503	T	T	1.78345	0.0570518	0.303591	5.93e-10	1.44e-09	T	NM_001105515; NM_001301829; NM_001301830; NM_005845; ENST00000376887; ENST00000467685; ENST00000471041; ENST00000474158; ENST00000484109; ENST00000536256; ENST00000629385; BC041560; OTTHUMT00000045478; OTTHUMT00000045479; OTTHUMT00000045480; OTTHUMT00000045481; OTTHUMT00000045482; OTTHUMT00000474650; OTTHUMT00000484007	chr13	-	Multiple_Complex	10	13q32
		ATP binding cassette subfamily C member 5	TC0300013360.hg.1	ABCC5		7.15554	5.7672	6.57128	6.79187	5.74614	5.4138	0.424222	5.65493	5.9482	7.19588	4.8844	4.16237	5.3533	4.29249	6.79199	6.57137	6.77541	6.28099	8.64395	8.72913	8.89785	9.19651	7.36537	6.68589	6.6791	7.31404	5.77904	6.51781	0.719152	0.697064	T	T	-1.66876	0.164634	0.509031	1.83e-09	4.09e-09	T	NM_001023587; NM_005688; ENST00000265586; ENST00000334444; ENST00000382494; ENST00000392579; ENST00000427120; ENST00000437205; ENST00000437341; ENST00000438979; ENST00000443376; ENST00000443497; ENST00000446941; ENST00000476402; ENST00000492216; BC140771; OTTHUMT00000346350; OTTHUMT00000346351; OTTHUMT00000346352; OTTHUMT00000346353; OTTHUMT00000346354; OTTHUMT00000346355; OTTHUMT00000346356; OTT…	chr3	-	Multiple_Complex	10	3q27
		ATP binding cassette subfamily C member 6	TC1600009545.hg.1	ABCC6		5.30301	4.79897	4.87566	4.63759	5.72913	4.75975	0.902234	6.54825	6.64235	5.83359	9.91105	9.81764	9.53516	9.70311	4.55194	4.49373	3.94729	4.29525	4.40252	4.64033	4.90642	5.19145	4.59992	4.10214	5.22198	4.79205	4.70116	4.83888	0.598063	0.27159	T	T	-1.10016	0.863905	0.964224	5.82e-15	3.94e-14	T	NM_001079528; NM_001171; BC131732; OTTHUMT00000252232; OTTHUMT00000436242; OTTHUMT00000436243; OTTHUMT00000436244; OTTHUMT00000436245; OTTHUMT00000436246; OTTHUMT00000436397	chr16	-	Multiple_Complex	10	16p13.1
		ATP binding cassette subfamily C member 8	TC1100010237.hg.1	ABCC8		3.01396	2.78603	3.09225	4.80272	2.91903	2.72916	0.480234	3.31916	4.59701	3.15688	3.37489	2.53755	3.21069	3.11348	3.03113	2.75692	2.9358	3.02744	3.07103	3.2303	3.36963	3.56549	2.88076	2.57599	2.76551	2.97324	2.82797	3.00231	1.1463	0.159087	F	F	-1.12845	0.143447	0.475451	0.0499485	0.0522583	F	NM_000352; NM_001287174; ENST00000302539; ENST00000389817; ENST00000524561; ENST00000525022; ENST00000526002; ENST00000526037; ENST00000526168; ENST00000526921; ENST00000527905; ENST00000528202; ENST00000528374; ENST00000529967; ENST00000530147; ENST00000531137; ENST00000531642; ENST00000531891; ENST00000531911; ENST00000532220; ENST00000532728; ENST00000612903; OTTHUMT00000389091; OTTHUMT0000038…	chr11	-	Multiple_Complex	10	11p15.1
		Transcript Identified by AceView, Entrez Gene ID(s) 10060	TC1200010113.hg.1	ABCC9		4.04721	3.62054	2.60258	3.20877	3.08888	3.05201	0.515877	5.07178	5.55659	3.0088	3.28638	3.52959	4.16296	4.00056	2.46499	2.5104	2.79578	2.76905	3.64838	4.53282	4.45109	4.43683	2.77793	3.16014	3.60397	3.21294	3.09154	3.53556	0.0819621	0.742209	F	F	-1.36039	0.327149	0.682506	2.01e-06	3.06e-06	F	ABCC9.jAug10-unspliced	chr12	-	Unassigned	6
		ATP binding cassette subfamily C member 9	TC1200010111.hg.1	ABCC9		7.62265	7.27253	5.87541	9.21279	8.52696	8.39068	0.0390938	10.623	10.0139	11.1128	11.6622	11.8371	11.702	11.6633	6.14548	6.43823	6.0633	5.64114	11.8228	12.0202	12.0018	11.9343	7.496	7.196	6.18067	7.18146	8.4616	7.33994	0.440605	0.924426	T	T	2.17596	3.58e-05	0.0065691	2.45e-15	1.85e-14	T	NM_005691; NM_020297; ENST00000261200; ENST00000261201; ENST00000326684; ENST00000538350; ENST00000544039; ENST00000621589; OTTHUMT00000402228; OTTHUMT00000402229; OTTHUMT00000402230; OTTHUMT00000402231; OTTHUMT00000402232; uc001rfk.3	chr12	-	Coding	10	12p12.1
		Transcript Identified by AceView, Entrez Gene ID(s) 215	TC0X00008796.hg.1	ABCD1		4.36234	4.32521	4.83403	4.75604	4.92201	5.04674	0.094957	5.82996	6.62912	4.6165	4.95045	4.39572	5.07206	4.81024	3.99883	4.66797	4.31175	4.32066	5.11211	4.59533	4.6092	5.23914	4.41393	4.54067	4.50404	4.60413	4.91183	4.34453	0.145837	0.283657	T	T	1.48175	0.0820098	0.363223	6.53e-06	9.46e-06	T	ABCD1.gAug10-unspliced	chrX	+	Coding	6
		ATP binding cassette subfamily D member 1	TC0X00008795.hg.1	ABCD1		7.96325	7.83165	8.10801	8.37771	8.16898	7.95817	0.238743	8.61126	8.34732	6.41426	6.90317	7.15617	7.22021	6.8394	6.8473	6.99261	7.38772	7.08294	6.7875	7.49477	7.0401	7.80012	6.44281	6.69778	6.0003	6.53721	8.16842	7.96672	0.209771	0.138233	T	T	1.15005	0.402652	0.736851	1.23e-07	2.16e-07	T	NM_000033; ENST00000218104; ENST00000370129; ENST00000443684; BC015541; BC025358; OTTHUMT00000061041; OTTHUMT00000061042; OTTHUMT00000061043; uc004fif.2	chrX	+	Multiple_Complex	10	Xq28
		Transcript Identified by AceView, Entrez Gene ID(s) 225	TC1200010412.hg.1	ABCD2		5.35728	3.78632	5.48459	6.47411	4.8928	5.17845	0.431579	6.85946	6.64584	4.72029	4.41699	4.97973	4.79839	4.27387	2.9859	3.48112	3.80072	3.79909	4.75808	4.942	4.79171	4.75211	3.77021	4.83175	4.5669	4.40233	5.06448	5.41834	0.842701	0.94589	T	T	-1.27798	0.118818	0.435029	2.11e-05	2.91e-05	T	ABCD2.eAug10-unspliced	chr12	-	Unassigned	6
		ATP binding cassette subfamily D member 2	TC1200010413.hg.1	ABCD2		7.18154	7.26243	8.05151	6.4884	7.68094	7.14518	0.424068	7.16317	7.09843	6.9843	4.88532	4.80929	5.28237	5.09222	4.83471	4.50299	4.85865	5.05007	4.46407	5.03516	5.24542	5.53726	5.54868	5.17214	5.37311	5.37229	7.11436	7.22363	0.597293	0.480631	T	T	-1.07868	0.18227	0.533538	5.89e-10	1.43e-09	T	NM_005164; ENST00000308666; BC104901; BC104903; OTTHUMT00000403591	chr12	-	Multiple_Complex	10	12q12
		Transcript Identified by AceView, Entrez Gene ID(s) 5825	TC0100009101.hg.1	ABCD3		4.55781	4.12886	5.43594	5.16709	4.49422	4.39166	0.961766	4.74715	3.82567	5.79404	4.60885	5.08696	5.19742	5.42955	3.67086	4.34207	3.69636	4.48494	5.07879	5.41424	3.6765	4.90104	4.91694	4.4053	4.11037	4.4953	4.44503	4.63932	0.421221	0.666279	F	F	-1.14416	0.95159	0.988737	0.0390085	0.0410486	F	ABCD3.rAug10-unspliced	chr1	+	Unassigned	6
		Transcript Identified by AceView, Entrez Gene ID(s) 5825	TC0100009102.hg.1	ABCD3		4.09569	3.14258	3.14414	2.66643	3.55744	3.36671	0.561412	4.04378	3.09812	3.0315	3.64932	3.23303	3.06816	4.23154	2.85926	2.73346	2.68425	2.91424	4.31419	3.10261	2.61995	3.79498	2.92466	3.45091	3.93081	3.3769	3.37937	3.14339	0.46916	0.549828	F	F	1.17771	0.486392	0.791272	0.29267	0.295828	F	ABCD3.vaAug10-unspliced	chr1	+	Unassigned	6
		ATP binding cassette subfamily D member 3	TC0100009097.hg.1	ABCD3		11.2679	11.3646	11.9011	11.2486	11.1606	11.1642	0.183088	6.61044	7.14424	7.28828	13.6384	13.4161	13.3732	13.5738	10.445	10.819	10.5376	10.7971	10.4023	10.7016	10.8354	10.633	9.52758	9.59071	9.66502	9.58402	11.1625	11.3182	0.049808	0.341135	T	T	-1.11401	0.0879975	0.377412	4.41e-19	1.24e-17	T	NM_001122674; NM_002858; ENST00000315713; ENST00000370214; ENST00000464165; ENST00000468860; ENST00000484213; ENST00000493416; BC068509; OTTHUMT00000029597; OTTHUMT00000029598; OTTHUMT00000029599; OTTHUMT00000029600; OTTHUMT00000029601; OTTHUMT00000029602	chr1	+	Multiple_Complex	10	1p21.3
		ATP binding cassette subfamily D member 4	TC1400009690.hg.1	ABCD4		7.13595	7.57156	6.87689	7.56649	6.88895	7.32076	0.832555	7.45459	5.67088	6.61318	8.04915	7.85242	7.80721	8.17937	6.72955	6.75805	7.03205	6.73648	5.63987	6.95049	6.82491	6.34827	7.75756	7.50215	7.59869	7.38467	7.28162	7.17432	0.343002	0.351054	T	T	1.07721	0.811483	0.944778	7.99e-06	1.15e-05	T	NM_005050; NR_003256; ENST00000356924; ENST00000460308; ENST00000465085; ENST00000466822; ENST00000469672; ENST00000470637; ENST00000474270; ENST00000475240; ENST00000477803; ENST00000481348; ENST00000481935; ENST00000484380; ENST00000489207; ENST00000489678; ENST00000493427; ENST00000493752; ENST00000496015; ENST00000553486; ENST00000553745; ENST00000553998; ENST00000554453; ENST00000555617; ENS…	chr14	-	Multiple_Complex	10	14q24.3
		ATP binding cassette subfamily E member 1	TC0400008902.hg.1	ABCE1		9.92849	10.0285	10.7117	10.3873	10.2388	10.6315	0.509593	7.88338	9.95504	10.4687	10.5307	10.9686	10.7677	11.3378	11.3293	11.1031	10.6994	10.8112	11.5902	11.2913	11.2945	11.2433	10.4462	10.3564	10.4255	10.2952	10.4084	9.98052	0.198276	0.426264	T	T	1.34527	0.393848	0.731488	2.57e-08	4.92e-08	T	NM_001040876; NM_002940; ENST00000296577; ENST00000502586; ENST00000502803; ENST00000504292; ENST00000504683; ENST00000506506; ENST00000507193; ENST00000509593; ENST00000510321; ENST00000515678; BC016283; OTTHUMT00000365104; OTTHUMT00000365105; OTTHUMT00000365106; OTTHUMT00000365107; OTTHUMT00000365108; OTTHUMT00000365109; OTTHUMT00000365110; OTTHUMT00000365111; OTTHUMT00000365112; OTTHUMT0000036…	chr4	+	Multiple_Complex	10	4q31
		ATP binding cassette subfamily F member 1	TC0600007535.hg.1	ABCF1		8.19337	7.82404	8.24376	7.6892	8.02306	8.43301	0.885817	8.18452	8.39556	7.83547	9.0058	8.70131	9.06745	9.11867	8.54281	8.94457	8.92659	8.57973	10.1189	10.0835	10.512	10.0584	7.9606	7.93963	8.43867	8.3254	8.04242	8.21754	0.372553	0.229168	T	T	-1.12905	0.858629	0.962593	1.98e-09	4.4e-09	T	ENST00000326195; ENST00000376545; ENST00000441867; ENST00000468958; ENST00000475993; ENST00000479542; ENST00000542772; BC034488; BC112923; OTTHUMT00000076136; OTTHUMT00000076137; OTTHUMT00000076138; OTTHUMT00000076140; OTTHUMT00000256168; OTTHUMT00000256169; OTTHUMT00000399313	chr6	+	Multiple_Complex	10	6p21.33
		ATP binding cassette subfamily F member 2	TC0700013065.hg.1	ABCF2		7.39334	6.81591	7.37801	6.33486	6.79407	6.84168	0.0968129	4.56559	5.35889	4.17347	5.22907	5.90029	6.27215	6.47203	7.01729	6.87837	6.65064	7.03244	7.64579	7.73223	8.06055	8.4979	6.44003	6.20367	6.43868	6.38301	6.81691	7.38536	0.279883	0.329043	T	T	-1.48294	0.0578341	0.305309	1.55e-09	3.5e-09	T	NM_005692; NM_007189; ENST00000222388; ENST00000287844; ENST00000441774; ENST00000468073; ENST00000473874; ENST00000477252; BC001661; OTTHUMT00000336086; OTTHUMT00000336088; OTTHUMT00000336089; OTTHUMT00000348839; OTTHUMT00000348840; OTTHUMT00000348841	chr7	-	Multiple_Complex	10	7q36
		ATP binding cassette subfamily F member 3	TC0300009694.hg.1	ABCF3		9.18652	9.76304	8.91694	9.55712	9.4101	10.4837	0.2756	6.88578	6.46028	6.90382	8.53941	8.71841	8.36669	8.35053	7.11937	7.09577	7.00262	7.60752	8.0772	8.4197	8.48568	8.34078	7.51304	7.11542	6.37805	6.86578	9.48661	9.23922	0.582086	0.432229	T	T	1.18706	0.0770794	0.351912	5.7e-10	1.38e-09	T	NM_018358; ENST00000292808; ENST00000421340; ENST00000429586; ENST00000463685; ENST00000466416; ENST00000466742; ENST00000468892; ENST00000471226; ENST00000472608; ENST00000473311; ENST00000475728; ENST00000478288; ENST00000480539; ENST00000480562; ENST00000481116; ENST00000485921; ENST00000489719; ENST00000498136; BC009253; BC051754; BC051884; OTTHUMT00000346047; OTTHUMT00000346048; OTTHUMT00000…	chr3	+	Multiple_Complex	10	3q27.1
		ATP binding cassette subfamily G member 1	TC2100007241.hg.1	ABCG1		12.7496	12.3139	12.8829	10.7816	11.6827	11.7652	0.0259894	7.14478	8.54602	8.2866	7.43828	6.69415	7.72558	6.90486	6.14522	5.99315	6.35849	5.99264	10.8537	11.3402	11.0581	11.3841	13.0264	12.8761	12.9094	12.5448	11.7223	12.7406	0.545646	0.297573	T	T	-2.02558	0.00013713	0.0132485	9.37e-19	2.28e-17	T	NM_004915; NM_016818; NM_207174; NM_207627; NM_207628; NM_207629; ENST00000343687; ENST00000347800; ENST00000361802; ENST00000398437; ENST00000398449; ENST00000398457; ENST00000450121; ENST00000462050; ENST00000467818; ENST00000472587; ENST00000496783; BC029158; OTTHUMT00000195313; OTTHUMT00000195314; OTTHUMT00000195315; OTTHUMT00000195316; OTTHUMT00000195317; OTTHUMT00000195318; OTTHUMT000001953…	chr21	+	Multiple_Complex	10	21q22.3
		ATP binding cassette subfamily G member 2 (Junior blood group)	TC0400011279.hg.1	ABCG2		7.71034	6.54255	6.20488	8.34748	8.10022	7.77586	0.0608639	4.66363	6.00393	6.19391	8.25178	7.92671	8.71426	8.49747	6.78402	6.74888	6.1717	7.0898	5.93268	4.09949	3.54234	4.40121	3.62566	4.02909	3.73103	4.78694	8.08108	6.54554	0.286675	0.789954	T	T	2.89896	0.0104581	0.127592	1.25e-09	2.86e-09	T	NM_001257386; NM_004827; ENST00000237612; ENST00000503830; ENST00000505480; ENST00000515655; BC021281; BC092408; OTTHUMT00000253051; OTTHUMT00000363319; OTTHUMT00000363320; OTTHUMT00000363321; uc003hrh.3	chr4	-	Multiple_Complex	10	4q22
		ATP binding cassette subfamily G member 4	TC1100009242.hg.1	ABCG4		3.33655	4.30118	3.59521	3.46158	3.17513	3.64174	0.3746	4.76182	3.80049	4.14521	3.79693	3.58697	3.3423	3.57173	5.31956	5.58221	5.2405	4.84086	4.64612	3.68769	4.24107	4.3114	3.59654	4.02123	3.60767	3.35069	3.43761	3.6406	0.235314	0.499301	T	T	-1.15108	0.235734	0.594414	2.52e-06	3.81e-06	T	NM_001142505; NM_022169; ENST00000524604; ENST00000533694; ENST00000534402; ENST00000615496; ENST00000619701; ENST00000622721; BC041091; OTTHUMT00000388213; OTTHUMT00000388214; OTTHUMT00000388215; OTTHUMT00000388216; OTTHUMT00000388217; OTTHUMT00000388463	chr11	+	Multiple_Complex	10	11q23.3
		ATP binding cassette subfamily G member 5	TC0200012417.hg.1	ABCG5		3.68753	3.5693	3.1088	3.72382	4.05282	3.39879	0.355295	3.9202	3.81569	3.90179	7.26097	7.58216	7.35727	7.46843	3.00332	2.51655	2.97211	2.66587	3.42736	3.02205	3.03971	3.14135	3.8743	2.7278	2.9472	4.10896	3.72489	3.58746	0.327017	0.305769	F	F	1.09994	0.35188	0.69937	2.84e-13	1.29e-12	F	NM_022436; ENST00000260645; ENST00000405322; ENST00000409962; ENST00000486512; OTTHUMT00000250675; OTTHUMT00000326201; OTTHUMT00000326202; OTTHUMT00000327844; uc002rtn.3	chr2	-	Multiple_Complex	10	2p21
		ATP binding cassette subfamily G member 8	TC0200007402.hg.1	ABCG8		3.38327	3.20218	3.37557	3.37206	3.42691	3.40929	0.249943	4.47206	3.3237	3.54219	8.47893	9.2482	8.54889	8.69298	2.87012	2.80809	3.2614	3.69551	3.25604	4.12064	3.70624	4.34089	3.43516	3.33273	4.02806	3.06179	3.40586	3.37926	0.0280031	0.102402	F	F	1.01861	0.772691	0.929327	1.32e-15	1.08e-14	F	NM_022437; ENST00000272286; BC113657; BC143564; OTTHUMT00000250671; uc002rtq.3	chr2	+	Coding	10	2p21
		abhydrolase domain containing 1	TC0200007054.hg.1	ABHD1		2.98214	3.85325	2.90039	3.1322	3.19491	3.65002	0.827463	4.46513	3.54677	3.53036	3.34435	3.91879	3.61961	3.30201	10.2291	10.2917	10.1323	9.48188	3.79357	3.57812	3.7708	3.74075	3.52927	3.33812	3.67623	3.4415	3.16483	2.94293	0.282605	0.528119	F	F	1.16627	0.74823	0.920911	8.71e-19	2.15e-17	F	NM_032604; ENST00000316470; ENST00000416071; ENST00000420647; ENST00000448950; ENST00000489120; ENST00000496739; ENST00000621324; ENST00000622011; BC039576; OTTHUMT00000214188; OTTHUMT00000214189; OTTHUMT00000324830; OTTHUMT00000324831; OTTHUMT00000324832; OTTHUMT00000324833; OTTHUMT00000476694	chr2	+	Multiple_Complex	10	2p23.3
		abhydrolase domain containing 10	TC0300008331.hg.1	ABHD10		7.66547	7.77571	7.63602	7.19403	7.32802	7.59142	0.0609452	4.30569	5.6568	5.27359	6.48316	6.7293	6.06842	6.11318	6.808	6.60696	6.26834	6.07458	5.75813	4.68377	5.02718	4.4644	5.66472	5.27612	5.50457	5.75003	7.3526	7.66274	0.202177	0.0736359	T	T	-1.23983	0.241716	0.599933	8.69e-10	2.05e-09	T	NM_001272069; NM_018394; NR_073570; NR_073571; ENST00000273359; ENST00000491580; ENST00000493784; ENST00000494817; ENST00000497293; BC014516; OTTHUMT00000354326; OTTHUMT00000354327; OTTHUMT00000354328; OTTHUMT00000354329; OTTHUMT00000354330	chr3	+	Multiple_Complex	10	3q13.2
		abhydrolase domain containing 11	TC0700011502.hg.1	ABHD11		5.77201	5.56121	5.77007	5.11741	5.07443	5.36911	0.0112343	6.29958	5.8609	6.1301	5.39934	5.79755	5.71241	5.64205	5.4099	5.26254	4.95587	5.51629	5.32571	5.34036	5.60174	5.18183	5.1752	5.13481	4.83097	5.40167	5.0968	5.771	0.159184	0.121149	T	T	-1.59572	0.0119743	0.138007	0.000520061	0.000627561	T	NM_001145364; NM_001301058; NM_148912; NM_148913; NR_026910; NR_026912; ENST00000222800; ENST00000357419; ENST00000395147; ENST00000412965; ENST00000437775; ENST00000437891; ENST00000458339; ENST00000462381; ENST00000468331; ENST00000468998; ENST00000474130; ENST00000480445; ENST00000486114; ENST00000497897; BC008251; BC067750; OTTHUMT00000252306; OTTHUMT00000348051; OTTHUMT00000348052; OTTHUMT00…	chr7	-	Multiple_Complex	10	7q11.23
		abhydrolase domain containing 12	TC2000008741.hg.1	ABHD12		8.6962	8.14452	8.1367	8.05424	8.10848	7.77921	0.177866	6.67271	5.56592	5.70455	7.52593	7.28078	7.29651	7.10527	7.1534	6.93212	6.92201	6.9903	6.42437	6.24518	6.38287	6.54097	6.7348	6.37646	6.84013	6.49292	8.08025	8.14077	0.176542	0.320794	T	T	-1.04284	0.0760841	0.349488	7.83e-11	2.19e-10	T	NM_001042472; NM_015600; ENST00000339157; ENST00000376542; ENST00000450393; ENST00000461204; ENST00000465694; ENST00000471287; ENST00000481556; ENST00000491682; ENST00000576316; BC014049; OTTHUMT00000078423; OTTHUMT00000078424; OTTHUMT00000078425; OTTHUMT00000078426; OTTHUMT00000078427; OTTHUMT00000078428; OTTHUMT00000078429; OTTHUMT00000078430; OTTHUMT00000439492	chr20	-	Multiple_Complex	10	20p11.21
		abhydrolase domain containing 12B	TC1400007133.hg.1	ABHD12B		3.86838	3.68293	4.40838	3.64392	3.67409	3.34184	0.147977	3.26028	5.70726	4.60654	4.50403	3.30171	3.50992	4.01515	3.74687	3.24527	3.62043	3.10446	4.09822	3.67458	3.4678	3.27984	3.84843	3.92497	4.69829	4.08658	3.65839	3.89593	0.183735	0.376889	F	F	-1.17898	0.154714	0.492987	0.000518711	0.000626046	F	NM_001206673; NM_181814; ENST00000337334; ENST00000353130; ENST00000382029; ENST00000553715; ENST00000554241; ENST00000554566; ENST00000555292; ENST00000556857; ENST00000557345; BC034603; BC107141; BC107142; OTTHUMT00000276867; OTTHUMT00000411029; OTTHUMT00000411030; OTTHUMT00000411031; OTTHUMT00000411032; OTTHUMT00000411034; OTTHUMT00000411035; OTTHUMT00000411036; OTTHUMT00000411037; uc001wyr.3;…	chr14	+	Multiple_Complex	10	14q22.1
		abhydrolase domain containing 13	TC1300007969.hg.1	ABHD13		8.13012	9.27891	7.26623	9.47206	8.73928	8.63626	0.32083	7.4864	8.05862	9.19249	9.13884	9.24628	9.20886	8.91892	8.00407	8.38224	8.63342	8.58397	8.87273	8.92215	8.97071	9.1468	9.60387	9.79138	9.50039	9.71249	8.68987	8.20045	0.455731	1.0097	T	T	1.40389	0.0339523	0.231325	0.000321517	0.000396248	T	NM_032859; ENST00000375898; BC022566; BC070226; OTTHUMT00000045743	chr13	+	Coding	10	13q33.3
		abhydrolase domain containing 14A	TC0300013838.hg.1	ABHD14A		7.44212	7.76755	7.22848	7.77811	7.58567	8.11589	0.190339	6.94076	7.03758	8.13214	6.3542	5.47832	5.9488	5.22466	5.89822	5.76664	6.00671	6.50793	5.18668	6.36116	6.05494	6.51591	5.79809	5.5123	4.9619	5.68314	7.80871	7.46797	0.268409	0.27146	T	T	1.26641	0.288481	0.647699	1.61e-07	2.78e-07	T	NM_015407; ENST00000273596; ENST00000458031; ENST00000474575; ENST00000491470; ENST00000494478; ENST00000497864; BC002571; OTTHUMT00000349689; OTTHUMT00000349690; OTTHUMT00000349693; OTTHUMT00000349694; OTTHUMT00000349696	chr3	+	Multiple_Complex	10	3p21.1
		ABHD14A-ACY1 readthrough	TC0300013840.hg.1	ABHD14A-ACY1		9.40304	9.41912	9.23812	9.23392	9.29398	9.07414	0.155654	9.34886	9.11915	9.4224	12.4837	12.5027	13.2236	12.6996	7.09461	7.44138	7.46495	7.48988	8.17739	8.4144	8.07396	7.95251	8.22978	7.88125	8.22333	7.64826	9.22292	9.41075	0.113627	0.100182	T	T	-1.13905	0.469488	0.780798	2.74e-17	3.88e-16	T	OTTHUMT00000349691; OTTHUMT00000349692; OTTHUMT00000349695; OTTHUMT00000365268	chr3	+	Multiple_Complex	10	3p
		abhydrolase domain containing 14B	TC0300013989.hg.1	ABHD14B		7.70055	8.79964	7.20009	7.64962	8.07051	8.16091	0.90953	6.39603	6.79852	7.94364	8.90874	9.00897	9.25666	8.90354	6.79009	6.12195	7.37639	6.66573	6.70889	6.56677	7.17628	7.40399	8.48418	8.09142	8.38111	8.10415	8.10961	7.79955	0.272867	0.818232	T	T	1.23977	0.854409	0.961206	6.65e-07	1.07e-06	T	NM_001146314; NM_001254753; NM_032750; ENST00000315877; ENST00000361143; ENST00000395008; ENST00000461108; ENST00000473912; ENST00000483233; ENST00000487005; ENST00000525795; BC007234; BC056411; OTTHUMT00000349669; OTTHUMT00000349670; OTTHUMT00000349671; OTTHUMT00000349672; OTTHUMT00000349673; OTTHUMT00000349674; OTTHUMT00000383842; uc003dcn.3	chr3	-	Multiple_Complex	10	3p21.2
		abhydrolase domain containing 15	TC1700010247.hg.1	ABHD15		6.30059	6.17396	6.22534	6.05763	5.98511	5.93787	0.0090772	5.17948	5.16285	5.26847	5.85405	6.81447	6.90799	6.42416	5.278	5.48625	5.02647	5.02632	5.50281	5.09198	5.50762	6.24761	6.67082	6.80343	6.44201	6.8268	5.99093	6.23098	0.0603231	0.0636888	T	T	-1.18103	0.361903	0.708414	7.54e-06	1.08e-05	T	NM_198147; ENST00000307201; BC012476; OTTHUMT00000447796	chr17	-	Coding	10	17q11.2
		abhydrolase domain containing 16A	TC0600014262.hg.1	ABHD16A		9.20566	8.81758	9.08698	8.28207	8.96584	8.69522	0.165414	7.59363	8.21101	8.89938	9.7185	9.30077	9.48629	9.74389	9.60956	9.57809	9.41624	8.85519	8.49962	8.50575	8.62541	8.72601	9.24146	8.9974	9.30419	9.16108	8.66231	9.0633	0.344352	0.198858	T	T	-1.32041	0.0778665	0.35383	5.53e-06	8.08e-06	T	NM_001177515; NR_033488; NR_033489; ENST00000395952; ENST00000440843; ENST00000468037; ENST00000468205; ENST00000471644; ENST00000474007; ENST00000475742; ENST00000477016; ENST00000477462; ENST00000482224; ENST00000490209; ENST00000492084; ENST00000492899; ENST00000495769; ENST00000496579; ENST00000498420; BC031839; OTTHUMT00000076342; OTTHUMT00000076343; OTTHUMT00000076344; OTTHUMT00000076345; O…	chr6	-	Multiple_Complex	10	6p21.3
		abhydrolase domain containing 16B	TC2000008094.hg.1	ABHD16B		5.61868	5.63102	5.42814	5.65286	5.79861	5.76493	0.0857076	7.08119	7.15541	6.62057	5.97613	5.71005	6.25089	5.77352	6.47363	6.02084	6.59435	6.22661	6.28381	7.23403	6.35316	6.3028	6.26384	5.24426	6.59871	6.06295	5.76322	5.6246	0.0763075	0.113738	T	T	1.10085	0.528235	0.81436	0.00133726	0.00155955	T	NM_080622; ENST00000369916; OTTHUMT00000080254	chr20	+	Coding	10	20q13.33
		abhydrolase domain containing 17A	TC1900009192.hg.1	ABHD17A		6.33973	7.04485	7.10398	7.2232	7.20223	7.67361	0.137465	5.81181	6.60597	5.13199	5.85704	6.08243	6.14409	5.84153	6.74641	6.51553	6.84294	6.75336	5.19629	5.44164	6.79312	6.40757	7.96096	8.04159	7.70588	8.81657	7.21314	7.07321	0.266304	0.4252	T	T	1.10185	0.11809	0.433562	8.59e-07	1.37e-06	T	NM_001130111; NM_031213; ENST00000250974; ENST00000292577; ENST00000588598; ENST00000590661; ENST00000591351; ENST00000592757; BC000158; BC009256; BC011667; BC020512; BC033749; BC035961; BC071644; BC071876; BC094816; OTTHUMT00000415556; OTTHUMT00000415557; OTTHUMT00000449218; OTTHUMT00000449219; OTTHUMT00000449220; OTTHUMT00000449221	chr19	-	Multiple_Complex	10	19p13.3
		abhydrolase domain containing 17B	TC0900010390.hg.1	ABHD17B		8.83668	8.42174	9.20917	8.04985	8.50656	8.8153	0.314756	6.01423	4.10826	5.46202	8.7453	8.70266	8.63688	9.32904	9.36818	9.15084	9.41639	9.26056	9.3299	9.34505	9.42956	9.14191	9.08068	8.82382	8.68632	9.0413	8.4718	8.82554	0.385101	0.393906	T	T	-1.27786	0.117467	0.432372	6.89e-14	3.61e-13	T	NM_001025780; NM_016014; ENST00000333421; ENST00000377041; BC038390; BC044576; OTTHUMT00000052624; OTTHUMT00000052625	chr9	-	Multiple_Complex	10	9q21.13
		abhydrolase domain containing 17C	TC1500008043.hg.1	ABHD17C		7.94163	7.53976	8.52162	6.65267	7.23238	7.73193	0.132867	5.5946	5.13396	5.09295	5.98348	5.19142	6.10491	6.26081	5.72345	5.50036	5.25993	5.66126	4.94143	5.3744	6.38934	5.59826	6.8038	7.30952	6.55723	6.96752	7.21159	7.984	0.540126	0.493615	T	T	-1.70811	0.0286201	0.214416	2.26e-07	3.83e-07	T	NM_021214; ENST00000258884; ENST00000558464; ENST00000559506; ENST00000560126; ENST00000560609; BC059401; BC115003	chr15	+	Multiple_Complex	10	15q25.1
		abhydrolase domain containing 18	TC0400008666.hg.1	ABHD18		8.24069	7.9899	8.13859	8.61895	8.17298	8.03059	0.474399	6.32083	7.24923	7.80795	8.81559	9.07043	8.52971	8.82379	6.85242	6.80486	6.97704	6.61482	8.12621	8.22088	8.38185	8.58786	8.49002	8.40227	8.36926	8.57952	8.18759	8.12756	0.306956	0.126114	T	T	1.04249	0.426114	0.754441	1.97e-10	5.15e-10	T	NM_001039717; ENST00000388795; ENST00000398965; ENST00000444616; ENST00000473040; ENST00000513371; ENST00000611882; BC034253; BC128142; BC128143; OTTHUMT00000257098; OTTHUMT00000257099; OTTHUMT00000257101; OTTHUMT00000363987	chr4	+	Multiple_Complex	10	4q28.2
		abhydrolase domain containing 2	TC1500008245.hg.1	ABHD2		14.8527	13.8081	15.0382	13.7312	13.7838	14.0004	0.136646	11.6291	11.9139	11.4079	16.0393	16.1475	16.1719	15.9005	14.1467	14.2843	14.5788	14.549	12.3812	12.2582	12.5471	12.5522	13.0578	13.1087	12.8679	12.9176	13.771	14.9417	0.142655	0.663184	T	T	-2.25115	0.00449951	0.0826955	2.68e-14	1.54e-13	T	NM_007011; NM_152924; ENST00000352732; ENST00000355100; ENST00000562073; ENST00000562254; ENST00000564876; ENST00000565066; ENST00000565825; ENST00000565973; ENST00000568308; ENST00000569411; ENST00000569550; BC019248; BC090052; OTTHUMT00000309074; OTTHUMT00000421124; OTTHUMT00000421125; OTTHUMT00000421126; OTTHUMT00000421127; OTTHUMT00000421128; OTTHUMT00000421130; OTTHUMT00000421131; OTTHUMT000…	chr15	+	Multiple_Complex	10	15q26.1
		Transcript Identified by AceView, Entrez Gene ID(s) 171586	TC1800008235.hg.1	ABHD3		6.28706	4.47985	5.01979	4.70262	4.26536	4.92059	0.328617	7.7995	8.65325	6.99296	4.80643	5.40451	5.68801	5.49647	3.52509	4.31346	4.23227	4.16647	5.2315	5.66622	5.67377	5.44993	5.51076	6.40349	6.25508	7.12641	4.66188	5.12761	0.333675	0.927678	F	T	-1.38102	0.108816	0.41811	4.76e-08	8.8e-08	F	ABHD3.pAug10-unspliced	chr18	-	Unassigned	6
		abhydrolase domain containing 3	TC1800008234.hg.1	ABHD3		5.4267	5.73898	6.01828	6.03713	5.81722	6.16106	0.234655	5.44867	6.12368	6.46309	8.2597	7.54336	8.24738	8.32367	5.79406	5.71621	5.37039	5.59595	6.49313	6.38997	6.23423	6.4	7.26151	7.4396	7.04096	7.11475	6.0171	5.73033	0.174138	0.295943	T	T	1.2199	0.196755	0.549051	4.49e-11	1.31e-10	T	NM_001308256; NM_001308257; NM_138340; ENST00000289119; ENST00000577564; ENST00000577891; ENST00000577928; ENST00000578270; ENST00000579875; ENST00000579982; ENST00000580477; ENST00000580981; ENST00000584464; BC021196; OTTHUMT00000444757; OTTHUMT00000444758; OTTHUMT00000444759; OTTHUMT00000444760; OTTHUMT00000444761; OTTHUMT00000445562; OTTHUMT00000445563; OTTHUMT00000445564; OTTHUMT00000445565; …	chr18	-	Multiple_Complex	10	18q11.2
		abhydrolase domain containing 4	TC1400006652.hg.1	ABHD4		6.13235	6.62614	6.05701	5.57702	6.24927	6.68501	0.796758	9.04413	7.61466	7.9799	6.88081	7.25852	6.72691	6.90088	6.18342	6.59429	6.71098	6.60011	6.42047	6.50802	6.26461	6.25274	6.40402	6.59028	6.30945	5.9796	6.19498	6.09622	0.558186	0.309142	T	T	1.07086	0.678439	0.893138	2.07e-07	3.54e-07	T	NM_022060; ENST00000216327; ENST00000418446; ENST00000428304; ENST00000489928; ENST00000537243; ENST00000539344; ENST00000541962; ENST00000542041; ENST00000544562; ENST00000545034; BC024779; OTTHUMT00000071622; OTTHUMT00000071623; OTTHUMT00000401541; OTTHUMT00000401542; OTTHUMT00000401543; OTTHUMT00000401544; OTTHUMT00000401545; OTTHUMT00000401546; OTTHUMT00000401547; OTTHUMT00000474117	chr14	+	Multiple_Complex	10	14q11.2
		abhydrolase domain containing 5	TC0300007194.hg.1	ABHD5		6.26832	5.69385	6.73273	6.87608	6.00656	5.2071	0.740386	6.65702	6.96115	6.30916	6.1919	7.79393	7.15927	7.33098	7.29337	7.22109	7.00214	6.98312	7.68489	7.96444	7.84381	7.53817	6.8884	6.44913	5.81608	6.49712	6.02508	6.24038	0.834735	0.520411	T	T	-1.16095	0.593646	0.852456	0.00141682	0.00164937	T	NM_016006; ENST00000013894; ENST00000413300; ENST00000454293; ENST00000456453; ENST00000458276; ENST00000463153; ENST00000486764; BC021958; OTTHUMT00000256644; OTTHUMT00000319120; OTTHUMT00000319121; OTTHUMT00000319122; OTTHUMT00000319123; OTTHUMT00000344428; OTTHUMT00000344438	chr3	+	Multiple_Complex	10	3p21
		abhydrolase domain containing 6	TC0300007606.hg.1	ABHD6		10.1665	8.57401	9.81819	8.38025	8.93921	8.7019	0.172425	10.8972	10.0344	9.82413	11.1253	11.2346	10.8653	11.454	5.36514	6.56762	5.68945	5.81436	7.6035	7.25586	6.85859	6.85517	10.0049	9.67257	10.0925	10.1267	8.68125	9.82868	0.280538	0.837191	T	T	-2.21519	0.0172352	0.16568	1.61e-13	7.73e-13	T	NM_020676; ENST00000295962; ENST00000463756; ENST00000470440; ENST00000475982; ENST00000478253; ENST00000480457; ENST00000485900; ENST00000613521; BC001698; OTTHUMT00000353511; OTTHUMT00000353512; OTTHUMT00000353514; OTTHUMT00000353515; OTTHUMT00000353516; OTTHUMT00000353517; OTTHUMT00000353518; uc003djs.4	chr3	+	Multiple_Complex	10	3p14.3
		abhydrolase domain containing 8	TC1900009959.hg.1	ABHD8		6.818	7.20215	6.8702	6.79293	7.15267	7.06135	0.8218	6.5885	6.73555	6.62518	7.96357	8.49395	7.27869	7.37016	8.09857	7.42528	8.04423	7.44444	6.78563	6.64133	6.77638	7.18313	7.25807	7.00039	6.95263	6.79487	7.04823	6.84516	0.186994	0.208361	T	T	1.15114	0.885468	0.970589	0.00100873	0.00118747	T	NM_024527; ENST00000247706; ENST00000593489; ENST00000594194; BC007895; BC020173; BC039087; OTTHUMT00000462937; OTTHUMT00000462939; OTTHUMT00000462940; uc002ngb.4	chr19	-	Multiple_Complex	10	19p13.11
		abl-interactor 1	TC1000010101.hg.1	ABI1		10.3333	10.4089	10.261	10.7167	10.5409	10.3848	0.112209	10.3515	10.3062	10.9497	10.5513	10.2442	10.3902	10.3491	10.0148	9.86643	9.75527	9.94014	10.4246	10.7728	10.6	10.7231	11.9668	11.719	11.8049	11.7126	10.5461	10.3342	0.166052	0.0739563	T	T	1.15817	0.193277	0.545859	7.14e-10	1.71e-09	T	NM_001012750; NM_001012751; NM_001012752; NM_001178116; NM_001178119; NM_001178120; NM_001178121; NM_001178122; NM_001178123; NM_001178124; NM_001178125; NM_005470; ENST00000346832; ENST00000359188; ENST00000376137; ENST00000376138; ENST00000376139; ENST00000376140; ENST00000376142; ENST00000376160; ENST00000376166; ENST00000376170; ENST00000473481; ENST00000490841; ENST00000536334; BC024254; OTT…	chr10	-	Multiple_Complex	10	10p11.2
		abl-interactor 2	TC0200010518.hg.1	ABI2		8.31395	8.91159	8.61306	8.97411	8.5017	9.08922	0.386145	9.12014	9.59318	10.1159	6.57101	6.82019	6.90345	6.5865	9.19366	9.30077	9.44194	9.37414	5.91033	6.74797	6.6353	7.56906	7.67208	7.93678	8.07174	7.95955	9.00158	8.6129	0.311341	0.29882	T	T	1.30919	0.388884	0.72776	9.16e-11	2.53e-10	T	NM_001282925; NM_001282926; NM_001282927; NM_001282932; NM_005759; ENST00000261016; ENST00000261017; ENST00000261018; ENST00000295851; ENST00000376135; ENST00000411547; ENST00000413635; ENST00000416001; ENST00000416396; ENST00000417864; ENST00000422511; ENST00000422719; ENST00000424558; ENST00000425253; ENST00000430418; ENST00000430574; ENST00000431886; ENST00000441061; ENST00000444584; ENST00000…	chr2	+	Multiple_Complex	10	2q33
		ABI family, member 3	TC1700008194.hg.1	ABI3		4.50358	3.8959	4.08215	4.2019	4.11549	4.00164	0.788388	6.79181	5.63074	5.35675	4.41598	4.30036	3.91153	4.89197	3.1567	3.60872	3.8497	3.04517	4.99773	4.18814	3.96985	3.9074	7.70688	8.13924	7.66006	7.85286	4.10869	4.1193	0.100443	0.311333	F	F	-1.00738	0.847909	0.958518	4.3e-13	1.88e-12	F	NM_001135186; NM_016428; ENST00000225941; ENST00000419580; ENST00000571035; ENST00000573347; BC007780; OTTHUMT00000364475; OTTHUMT00000364476; OTTHUMT00000438282; OTTHUMT00000438283; uc002iop.1	chr17	+	Multiple_Complex	10	17q21.3
		ABI family, member 3 (NESH) binding protein	TC0300011849.hg.1	ABI3BP		9.47452	12.227	7.13154	10.9002	12.4403	12.2425	0.220231	5.9954	6.01333	6.69772	7.03641	6.66532	7.54144	7.02303	11.3802	11.5159	11.3428	11.3345	10.8527	10.7988	10.7112	10.8624	9.15023	9.03506	8.99937	9.11046	12.3374	9.5803	0.837915	2.55048	T	T	6.76025	0.00313563	0.0690244	7.78e-08	1.4e-07	T	NM_015429; ENST00000284322; ENST00000459682; ENST00000466947; ENST00000469764; ENST00000470336; ENST00000471714; ENST00000471901; ENST00000475896; ENST00000478235; ENST00000482765; ENST00000483129; ENST00000486770; ENST00000487012; ENST00000487249; ENST00000495063; ENST00000495591; ENST00000497021; ENST00000497395; ENST00000527258; ENST00000527943; ENST00000528305; ENST00000528490; ENST0000053023…	chr3	-	Multiple_Complex	10	3q12
		ABL proto-oncogene 1, non-receptor tyrosine kinase	TC0900008969.hg.1	ABL1		9.13946	9.86955	9.14116	8.96189	9.62418	9.60695	0.967201	8.02497	8.5511	8.81369	8.19215	8.19728	7.79585	8.24613	8.34184	8.14752	8.44551	8.52622	8.76631	8.92115	9.14055	8.91295	9.7707	9.75552	9.43102	9.30575	9.61521	9.14034	0.377497	0.421028	T	T	1.38979	0.949526	0.988309	9.21e-07	1.46e-06	T	NM_005157; NM_007313; ENST00000318560; ENST00000372348; ENST00000393293; BC117451; OTTHUMT00000054684; OTTHUMT00000054685; OTTHUMT00000054686	chr9	+	Multiple_Complex	10	9q34.1
		ABL proto-oncogene 2, non-receptor tyrosine kinase	TC0100016548.hg.1	ABL2		6.46423	7.15363	6.35407	7.90991	7.49071	7.56206	0.0240401	6.81115	7.17763	6.75291	6.70862	6.92896	6.70965	6.71424	7.89687	8.28726	8.04129	8.10352	7.9975	8.15839	7.95677	7.85142	7.94799	7.91125	7.79526	7.69123	7.52833	6.4114	0.224284	0.43334	T	T	2.16886	3.62e-05	0.0065712	4.29e-08	7.97e-08	T	NM_001136000; NM_001136001; NM_001168236; NM_001168237; NM_001168238; NM_001168239; NM_005158; NM_007314; ENST00000344730; ENST00000367623; ENST00000392043; ENST00000502732; ENST00000504324; ENST00000504405; ENST00000507173; ENST00000508127; ENST00000509520; ENST00000511413; ENST00000512653; BC065912; OTTHUMT00000085174; OTTHUMT00000085175; OTTHUMT00000360386; OTTHUMT00000360387; OTTHUMT000003603…	chr1	-	Multiple_Complex	10	1q25.2
		actin binding LIM protein 1	TC1000011904.hg.1	ABLIM1		12.5242	15.2094	12.868	13.953	15.0018	15.152	0.274737	16.02	16.0713	16.7277	12.1803	11.9566	11.8946	12.4495	12.6636	12.643	12.8344	12.7353	12.463	12.2192	12.7979	12.2013	11.0104	11.1046	10.8102	11.2267	15.0738	12.7031	0.653202	1.46119	T	T	5.17198	0.0128577	0.143104	7.64e-10	1.82e-09	T	NM_001003407; NM_001003408; NM_002313; NM_006720; ENST00000277895; ENST00000369252; ENST00000369253; ENST00000369256; ENST00000369266; ENST00000392952; ENST00000392955; ENST00000428430; ENST00000440467; ENST00000466400; ENST00000477638; ENST00000481974; ENST00000485570; ENST00000533213; BC002448; OTTHUMT00000050469; OTTHUMT00000050470; OTTHUMT00000050474; OTTHUMT00000050475; OTTHUMT00000050477; O…	chr10	-	Multiple_Complex	10	10q25
		actin binding LIM protein family, member 2	TC0400009958.hg.1	ABLIM2		7.04708	5.38522	6.65254	6.40658	6.45013	5.87971	0.838402	6.22045	5.42738	5.42429	5.2324	5.31913	5.8677	5.48624	5.67216	5.56206	5.8537	5.55225	12.4364	13.1537	13.0743	12.8981	8.70338	8.70016	8.46313	8.68618	6.42747	6.62009	0.317508	0.868288	T	T	-1.14284	0.698754	0.902859	6.72e-18	1.18e-16	T	NM_001130083; NM_001130084; NM_001130085; NM_001130086; NM_001130087; NM_001130088; NM_001286688; NM_032432; ENST00000318888; ENST00000341937; ENST00000361581; ENST00000361737; ENST00000407564; ENST00000428004; ENST00000447017; ENST00000502800; ENST00000504172; ENST00000505872; ENST00000509819; ENST00000510277; ENST00000512594; ENST00000514025; ENST00000515079; ENST00000545242; BC122567; OTTHUMT0…	chr4	-	Multiple_Complex	10	4p16.1
		actin binding LIM protein family, member 3	TC0500009055.hg.1	ABLIM3		5.05143	6.42873	4.43886	6.71016	6.20639	6.05423	0.176682	5.83583	7.78507	7.93204	11.8484	11.7097	11.9006	11.8928	5.12176	5.15176	5.54551	5.23635	8.73272	8.90534	8.82964	8.65457	8.20744	7.51263	7.70253	7.6564	6.21474	5.17343	0.343312	1.01913	T	T	2.0581	0.00390602	0.076508	8.94e-16	7.68e-15	T	NM_001301015; NM_001301018; NM_001301027; NM_001301028; NM_014945; ENST00000309868; ENST00000326685; ENST00000356541; ENST00000502855; ENST00000504238; ENST00000506113; ENST00000508983; ENST00000514212; ENST00000515171; ENST00000515796; ENST00000517451; ENST00000519549; BC001665; OTTHUMT00000252188; OTTHUMT00000373435; OTTHUMT00000373436; OTTHUMT00000373437; OTTHUMT00000373438; OTTHUMT00000373439…	chr5	+	Multiple_Complex	10	5q32
		ABO blood group (transferase A, alpha 1-3-N-acetylgalactosaminyltransferase; transferase B, alpha 1-3-galactosyltransferase)	TC0900011837.hg.1	ABO		4.87564	6.02573	4.18855	5.43575	5.40669	5.38708	0.517713	5.6034	4.64494	4.50545	4.16584	4.1375	3.85843	4.19217	3.95839	4.16352	3.59528	4.22304	3.58433	4.35549	4.59062	4.21919	3.92824	4.01757	4.0075	4.0853	5.40891	4.97658	0.0244873	0.928263	T	T	1.34942	0.231165	0.590171	0.000185249	0.000232966	T	NM_020469; ENST00000453660; ENST00000538324; ENST00000611156; BC069595; BC111575; OTTHUMT00000054907	chr9	-	Multiple_Complex	10	9q34.2
		ABO blood group (transferase A, alpha 1-3-N-acetylgalactosaminyltransferase; transferase B, alpha 1-3-galactosyltransferase) [Source:HGNC Symbol;Acc:HGNC:79]	TSUnmapped00000137.hg.1	ABO		6.65689	9.16121	4.32407	7.98864	8.13575	8.59237	0.339859	6.31249	5.5963	6.60236	4.18506	4.39361	4.18676	3.71694	4.96864	4.67969	4.97182	5.22584	3.89244	4.51522	3.62649	3.90515	5.26181	5.16134	5.16673	4.29269	8.15183	6.70239	0.31481	2.41908	T	T	2.73102	0.027257	0.208565	1.18e-05	1.67e-05	T	ENST00000626615			Coding	10
		active BCR-related	TC1700012324.hg.1	ABR		10.8509	10.0961	11.3568	9.2522	9.09241	9.46549	0.0172143	11.2222	10.3432	10.0258	5.72977	5.47718	5.94064	5.2715	6.41991	6.4192	6.3812	6.30932	6.05153	5.35582	6.03097	5.39954	8.29198	8.61675	8.80645	8.78228	9.26539	10.7927	0.187178	0.634432	T	T	-2.88252	9.91e-06	0.00303591	1.21e-16	1.35e-15	T	NM_001092; NM_001159746; NM_001256847; NM_001282149; ENST00000291107; ENST00000302538; ENST00000536794; ENST00000543210; ENST00000544583; ENST00000570441; ENST00000570525; ENST00000570688; ENST00000571022; ENST00000571120; ENST00000571306; ENST00000571383; ENST00000571543; ENST00000571797; ENST00000571945; ENST00000572152; ENST00000572441; ENST00000572585; ENST00000572650; ENST00000573325; ENST00…	chr17	-	Multiple_Complex	10	17p13.3
		actin binding Rho activating protein	TC0800011437.hg.1	ABRA		5.27562	4.78879	4.50245	5.57504	5.42127	4.82686	0.261901	4.44716	6.80493	5.03039	4.73982	4.30255	4.29694	4.93652	5.42739	5.13956	4.82342	4.80195	11.8123	12.1607	12.2926	12.3739	4.25967	4.99498	4.47515	4.50594	5.44308	4.83202	0.395125	0.390893	T	T	1.52738	0.119917	0.436521	1.76e-19	5.71e-18	T	NM_139166; ENST00000311955; BC105103; BC105105; OTTHUMT00000380416	chr8	-	Coding	10	8q23.1
		ABRA C-terminal like	TC0600009626.hg.1	ABRACL		7.04585	5.23168	6.53016	5.53784	5.26374	5.59338	0.216972	4.618	5.22537	4.80443	8.73214	8.2777	9.03289	8.66893	7.38593	7.197	7.04415	7.00144	7.0223	6.4533	6.6073	6.71432	8.868	8.80035	8.98339	9.30215	5.56437	6.43004	0.176483	0.934808	T	T	-1.82219	0.0146831	0.153187	5.73e-12	1.98e-11	T	NM_021243; ENST00000367660; ENST00000461027; OTTHUMT00000042445; OTTHUMT00000042446; uc003qil.2	chr6	+	Multiple_Complex	10	6q24.1
		activator of basal transcription 1	TC0600007313.hg.1	ABT1		5.59223	5.23351	5.76537	5.63609	5.63129	5.17061	0.827852	4.37715	4.69258	5.40465	5.6129	5.93838	5.91225	6.19489	5.16749	5.62234	5.38023	5.13036	5.4428	5.79517	5.77414	5.75218	5.9884	5.76296	5.85846	5.99725	5.63359	5.55903	0.26737	0.271272	T	T	1.05304	0.799113	0.93995	9.01e-05	0.000116549	T	NM_013375; ENST00000274849; BC048812; BC066313; OTTHUMT00000043698	chr6	+	Multiple_Complex	10	6p22.2
		ankyrin repeat and BTB (POZ) domain containing 1	TC0300008705.hg.1	ABTB1		5.96092	6.3038	6.08379	6.21869	5.47618	5.85652	0.324397	8.34102	7.28179	8.01614	6.1845	5.57444	5.86416	6.05442	4.90038	5.02764	5.37235	4.31934	6.48803	6.50022	6.79895	7.07633	7.44035	7.36632	7.30495	7.66324	5.85167	6.10392	0.371292	0.173718	T	T	-1.19106	0.290054	0.649585	1.95e-10	5.11e-10	T	NM_032548; NM_172027; NR_033429; ENST00000232744; ENST00000453791; ENST00000464431; ENST00000466612; ENST00000467179; ENST00000468137; ENST00000474129; ENST00000475042; ENST00000475265; ENST00000478298; ENST00000479280; ENST00000483857; ENST00000491633; ENST00000493365; ENST00000497162; BC011858; OTTHUMT00000356595; OTTHUMT00000356598; OTTHUMT00000356599; OTTHUMT00000356600; OTTHUMT00000356601; O…	chr3	+	Multiple_Complex	10	3q21
		ankyrin repeat and BTB (POZ) domain containing 2	TC1100010505.hg.1	ABTB2		5.67527	5.21955	5.72657	5.106	4.68516	5.41603	0.151198	5.40683	5.55902	5.85239	7.07783	6.52244	6.86459	6.67352	5.82284	5.81874	6.89694	6.47974	7.75178	7.89856	8.41084	8.22497	5.70658	5.12123	5.05499	5.58539	5.07888	5.69987	0.366832	0.2791	F	T	-1.53793	0.105369	0.411723	1.35e-09	3.09e-09	F	NM_145804; ENST00000435224; ENST00000530814; BC093968; OTTHUMT00000388703; OTTHUMT00000389838	chr11	-	Multiple_Complex	10	11p13
		Memczak2013 ANTISENSE, coding, INTERNAL, intronic best transcript NM_014371; TEC	TC1900007228.hg.1	AC006128.2; AKAP8L		5.95187	6.11573	6.07677	6.13239	6.08504	5.73849	0.662801	5.99792	7.50971	7.009	6.0934	6.35314	6.34136	6.12537	5.97991	5.98408	5.68194	5.97047	6.96231	6.26179	6.27259	6.22505	5.7527	6.0883	5.96016	5.72888	6.10775	6.07348	0.215057	0.0856037	T	T	1.02404	0.750712	0.922183	5.67e-05	7.47e-05	T	ENST00000624704; hsa_circ_0000902; OTTHUMT00000461589; uc060uth.1	chr19	+	NonCoding	10
		Transcript Identified by AceView, Entrez Gene ID(s) 84954; novel transcript, antisense to STAP2	TC1900006687.hg.1	AC007292.7; MPND		6.62783	7.25766	6.23943	5.94625	6.68678	6.58949	0.469434	10.2068	9.47753	8.34058	6.44365	5.47266	5.54129	6.14113	7.15766	6.32475	6.51556	6.36354	5.36059	6.4538	6.67096	5.96469	6.76991	6.61275	6.91234	7.33946	6.63615	6.68159	0.402411	0.513863	T	T	-1.032	0.385018	0.724916	2.25e-08	4.34e-08	T	ENST00000598582.1; MPND.iAug10; OTTHUMT00000458472; uc060rwc.1	chr19	+	NonCoding	10
		Transcript Identified by AceView, Entrez Gene ID(s) 57798; novel transcript, antisense to ERVW-1 and PEX1	TC0700013401.hg.1	AC007566.10; GATAD1		5.93441	5.82227	5.49252	6.47139	5.54655	5.58388	0.739745	6.26522	6.83476	6.69608	6.08291	6.0292	5.65021	5.88798	6.93924	7.28242	7.06479	6.92938	6.58734	5.99591	6.34947	6.25919	6.68733	6.1167	5.74625	6.6584	5.56598	5.80618	0.523513	0.229702	T	T	-1.18116	0.652876	0.882298	0.000378008	0.000462362	T	ENST00000441539.1; GATAD1.kAug10; OTTHUMT00000342059; uc064fig.1	chr7	+	NonCoding	10
		Memczak2013 ANTISENSE, coding, INTERNAL, intronic best transcript NM_001020819; novel transcript, antisense to MYADM	TC1900011381.hg.1	AC008753.6; MYADM		4.98642	5.46713	4.77388	5.05519	4.23077	4.3747	0.185077	7.04858	6.49784	6.36084	5.07209	5.30342	5.7812	4.97791	4.60295	5.08081	4.91516	4.12002	5.57927	5.12996	5.12641	5.36584	5.37565	5.35123	4.85945	4.61963	4.31004	5.0288	0.44035	0.355165	F	F	-1.64577	0.0794343	0.357997	1.49e-05	2.08e-05	F	ENST00000455835.2; hsa_circ_0000953; OTTHUMT00000134347; uc061cli.1	chr19	-	NonCoding	10
		novel transcript, antisense to C16orf53 and MVP; PAXIP1 associated glutamate-rich protein 1 [Source:HGNC Symbol;Acc:HGNC:28707]	TC1600011515.hg.1	AC009133.12; PAGR1		8.4517	7.72236	8.03771	8.27043	7.96617	7.7199	0.76377	5.75258	6.95492	7.46171	8.27219	7.92238	8.85651	9.15449	8.67575	8.66035	8.6679	8.38403	8.92722	8.85929	8.49457	8.63067	7.71494	7.932	7.84631	7.97322	7.9809	8.06219	0.275773	0.36578	T	T	-1.05797	0.740265	0.918702	4.49e-07	7.37e-07	T	ENST00000563806.1; ENST00000569981.1; OTTHUMT00000477845; OTTHUMT00000477846; uc002duc.2; uc059sut.1	chr16	-	NonCoding	10
		novel transcript, antisense to C16orf53 and MVP; PAXIP1 associated glutamate-rich protein 1 [Source:HGNC Symbol;Acc:HGNC:28707]	TC1600011516.hg.1	AC009133.12; PAGR1		7.04339	6.50772	5.8939	6.05062	6.2492	6.47656	0.563288	8.02012	8.21745	8.07953	5.41173	4.83989	5.45794	5.75418	6.15156	5.37348	6.03385	5.34007	5.67348	4.63963	5.41435	5.77271	5.61455	5.85833	5.80249	5.27619	6.25669	6.48737	0.213132	0.575188	T	T	-1.17339	0.486364	0.791272	2.13e-07	3.64e-07	T	ENST00000564980.1; ENST00000569809.1; OTTHUMT00000435585; OTTHUMT00000435586; uc002duh.4; uc059svc.1	chr16	-	NonCoding	10
		Memczak2013 ANTISENSE, coding, INTERNAL, intronic best transcript NM_175900; novel transcript, antisense to C16orf54	TC1600007423.hg.1	AC009133.17; C16orf54		6.71063	6.69738	7.45484	7.19177	7.33393	6.41885	0.946137	7.00596	7.36065	7.20305	6.99413	5.99806	7.26849	6.88192	6.21971	5.93082	5.51224	6.42432	7.73994	6.99943	6.53775	6.93237	6.87263	6.85054	6.8374	6.88662	7.25995	6.70427	0.492441	0.433545	T	T	1.46986	0.93433	0.984356	0.0337568	0.035657	T	ENST00000565600.1; hsa_circ_0000687; OTTHUMT00000435522; uc059stw.1	chr16	+	NonCoding	10
		novel transcript; Transcript Identified by AceView, Entrez Gene ID(s) 79634	TC0200010012.hg.1	AC010894.3; SCRN3		5.17922	5.05871	6.42067	4.97311	5.70394	5.02547	0.554634	6.04752	5.03434	5.67637	5.17947	4.85944	4.7678	4.09995	5.85261	6.33612	6.09503	5.88425	5.29129	3.87787	4.6537	4.50067	4.15718	4.25539	5.02293	4.00986	5.00036	5.12142	0.407671	0.753951	T	T	-1.08754	0.391141	0.729839	0.000460508	0.000558242	T	ENST00000417038.1; ENST00000444196.1; ENST00000606406.1; OTTHUMT00000334148; OTTHUMT00000334149; OTTHUMT00000470669; SCRN3.mAug10; SCRN3.tAug10; uc061pvb.1; uc061pvc.1; uc061pvd.1	chr2	+	Multiple_Complex	10
		Salzman2013 ANTISENSE, coding, INTERNAL, intronic, OVERLAPTX best transcript NM_152516; novel transcript	TC0200012760.hg.1	AC018462.2; COMMD1		3.97617	3.78273	3.63238	3.67842	4.47892	3.91803	0.425442	5.61352	5.48087	6.17566	4.73487	4.56992	3.73451	5.17797	3.29782	3.03733	3.20972	3.29725	4.14818	4.26089	4.20325	4.68871	4.14326	3.91939	3.99588	3.71413	3.9659	3.79351	0.410855	0.172345	T	T	1.12692	0.403021	0.736851	2.55e-07	4.31e-07	T	ENST00000421323.1; ENST00000425966.2; hsa_circ_0054911; OTTHUMT00000326542; OTTHUMT00000327130; uc002sbr.4; uc061jpo.1	chr2	-	NonCoding	10
		Olfactory receptor 4N4 [Source:UniProtKB/Swiss-Prot;Acc:Q8N0Y3]	TC15_KI270727v1_random00006436.hg.1	AC171558.1		3.43197	3.3517	3.38566	3.29772	3.3928	3.9247	0.491458	3.55478	5.93089	3.50144	3.05436	3.6452	3.48488	3.06672	4.37154	4.05411	4.34523	3.85865	3.98337	3.86293	3.4933	3.02792	3.06054	3.04927	3.5135	2.89391	3.3472	3.38868	0.337901	0.0402929	F	F	-1.02917	0.552144	0.826936	3.58e-06	5.34e-06	F	uc059oca.1	chr15_KI270727v1_random	+	Coding	10
			TSUnmapped00000044.hg.1	AC208162.1		5.2542	5.44673	5.31837	5.01292	5.17067	5.03664	0.0237022	5.21918	5.64556	5.24575	8.10566	8.62441	8.16525	7.99775	4.53813	4.59944	4.53432	4.42201	4.50556	4.65918	4.80726	4.79851	3.92511	4.54137	4.91459	4.82863	5.02526	5.33034	0.0850605	0.0980323	F	T	-1.23548	0.224306	0.582746	3.08e-14	1.74e-13	F	ENST00000625759			Coding	10
			TSUnmapped00000153.hg.1	AC208162.1		3.60798	4.58517	3.85574	4.66153	3.74987	4.19502	0.661787	4.53957	4.66521	4.98709	10.528	10.9631	10.7923	10.1483	3.67191	3.7073	3.73371	3.83516	4.00914	3.77853	3.69705	3.68927	3.7358	4.34523	3.77561	4.43679	4.20072	3.89109	0.455872	0.507995	F	F	1.23939	0.493084	0.794923	3.5e-18	6.85e-17	F	ENST00000627727			Coding	10
		acetyl-CoA acyltransferase 1	TC0300010744.hg.1	ACAA1		12.46	12.4088	12.7191	12.2397	12.2777	12.4807	0.181647	6.4535	8.00226	9.09731	14.673	14.3888	14.8727	14.8138	11.608	11.5344	11.1052	10.96	12.0959	11.4809	11.0961	11.4246	11.8971	12.095	12.2256	11.8205	12.2595	12.4355	0.129605	0.166366	T	T	-1.12974	0.397135	0.732753	3.03e-17	4.22e-16	T	NM_001130410; NM_001607; NR_024024; ENST00000301810; ENST00000333167; ENST00000411549; ENST00000418880; ENST00000421218; ENST00000423611; ENST00000440176; ENST00000447223; ENST00000450296; ENST00000451419; ENST00000452171; ENST00000460424; ENST00000465181; ENST00000469559; ENST00000469600; ENST00000480865; ENST00000484284; ENST00000489559; ENST00000625927; ENST00000627515; BC000635; BC011977; BC0…	chr3	-	Multiple_Complex	10	3p22.2
		acetyl-CoA acyltransferase 2	TC1800009289.hg.1	ACAA2		11.9278	11.8261	11.8218	11.463	11.8734	11.8312	0.370086	9.7296	10.0513	10.5235	15.364	15.2354	15.2194	15.1537	9.99649	10.3459	10.4019	10.2863	11.1631	11.2005	11.0435	11.0845	10.5231	10.4627	10.5164	10.2715	11.8514	11.8241	0.225736	0.0599969	T	T	1.01916	0.40649	0.739131	9.62e-20	3.54e-18	T	NM_006111; ENST00000285093; ENST00000585948; ENST00000586100; ENST00000586485; ENST00000587994; ENST00000589432; ENST00000591171; BC001918; OTTHUMT00000255921; OTTHUMT00000448381; OTTHUMT00000448382; OTTHUMT00000448401; OTTHUMT00000448402; OTTHUMT00000448403; OTTHUMT00000448610	chr18	-	Multiple_Complex	10	18q21.1
		Transcript Identified by AceView, Entrez Gene ID(s) 31	TC1700010493.hg.1	ACACA		3.84387	3.24856	4.08633	3.49127	3.54305	3.39381	0.378164	3.24812	3.11431	3.2502	3.30102	3.94402	4.6317	2.57608	3.64723	3.31652	3.8201	3.19627	3.91984	3.13137	4.02089	4.28107	4.38192	4.75796	3.008	3.54991	3.48221	3.79606	0.0757762	0.431092	F	F	-1.24302	0.565544	0.834747	0.794423	0.794905	F	ACACA.vaAug10-unspliced	chr17	-	Unassigned	6
		acetyl-CoA carboxylase alpha	TC1700010488.hg.1	ACACA		10.0361	10.6975	10.0779	9.4696	10.1157	10.8375	0.787316	11.375	11.4764	11.9856	10.5286	10.1868	10.2805	10.3524	8.07133	8.39662	8.38592	8.66056	8.18197	8.09214	7.91417	7.95976	8.2007	8.27339	8.18294	8.61644	10.1356	10.0579	0.684289	0.370395	T	T	1.05532	0.617894	0.86466	2.36e-12	8.8e-12	T	NM_198834; NM_198837; NM_198838; NM_198839; ENST00000612007; ENST00000612120; ENST00000612895; ENST00000612926; ENST00000613146; ENST00000613776; ENST00000614333; ENST00000614428; ENST00000614438; ENST00000614450; ENST00000614482; ENST00000614789; ENST00000615229; ENST00000616317; ENST00000616352; ENST00000617548; ENST00000617649; ENST00000618053; ENST00000618351; ENST00000618575; ENST00000619245…	chr17	-	Multiple_Complex	10	17q21
		acetyl-CoA carboxylase beta	TC1200008795.hg.1	ACACB		10.9061	10.9036	10.7777	10.4859	10.9184	10.8532	0.479299	11.1766	11.1747	12.3199	14.8693	14.6663	14.4918	14.5133	9.08379	9.111	8.9802	9.16547	12.3024	12.3104	12.5729	12.593	8.83771	8.89438	8.74556	8.97229	10.8844	10.9048	0.233165	0.0734033	T	T	-1.01421	0.511908	0.805082	1.02e-20	5.56e-19	T	NM_001093; ENST00000338432; ENST00000377848; ENST00000377854; ENST00000396233; ENST00000534852; ENST00000536440; ENST00000537279; ENST00000537347; ENST00000538526; ENST00000539864; ENST00000542524; ENST00000543080; ENST00000544651; ENST00000544726; ENST00000546328; OTTHUMT00000403077; OTTHUMT00000403078; OTTHUMT00000403079; OTTHUMT00000403080; OTTHUMT00000403081; OTTHUMT00000403083; OTTHUMT000004…	chr12	+	Multiple_Complex	10	12q24.11
		acyl-CoA dehydrogenase family, member 10	TC1200012706.hg.1	ACAD10		8.23201	8.16906	8.22462	7.07434	7.79253	7.59501	0.0284945	5.91559	6.06242	6.49384	7.67133	7.44389	7.13149	7.01193	6.97405	6.49598	6.50619	7.05415	4.98151	5.51924	5.1201	4.47313	5.97467	6.16894	5.43079	6.18039	7.55839	8.22817	0.371014	0.0344099	T	T	-1.59082	0.0119459	0.137898	3.89e-10	9.68e-10	T	NM_001136538; NM_025247; ENST00000313698; ENST00000413681; ENST00000455480; ENST00000502746; ENST00000503490; ENST00000504803; ENST00000505487; ENST00000507135; ENST00000507683; ENST00000507688; ENST00000508303; ENST00000509936; ENST00000511915; ENST00000512792; ENST00000514615; ENST00000514847; ENST00000515283; ENST00000546647; ENST00000547491; ENST00000549590; ENST00000550198; ENST00000552177; …	chr12	+	Multiple_Complex	10	12q24.12
		acyl-CoA dehydrogenase family, member 11	TC0300014049.hg.1	ACAD11		6.77949	6.83142	6.41836	6.12827	6.62056	6.45705	0.231033	4.38836	5.59264	5.11411	9.91255	9.90953	10.188	10.2721	6.37245	6.43247	6.41874	6.1336	5.73084	5.2593	5.32377	3.92838	5.83358	6.32176	6.5709	5.89027	6.42643	6.8044	0.250726	0.224993	T	T	-1.29951	0.383212	0.72377	3.57e-13	1.58e-12	T	NM_032169; ENST00000264990; ENST00000469042; ENST00000477604; ENST00000481970; ENST00000485198; ENST00000487024; ENST00000489991; ENST00000496418; ENST00000507705; ENST00000510100; BC125204; OTTHUMT00000357279; OTTHUMT00000357280; OTTHUMT00000357684; OTTHUMT00000357685; OTTHUMT00000357686; OTTHUMT00000357687; OTTHUMT00000357705; OTTHUMT00000357706; OTTHUMT00000358318; OTTHUMT00000358319	chr3	-	Multiple_Complex	10	3q22.1
		acyl-CoA dehydrogenase family, member 8	TC1100009616.hg.1	ACAD8		8.2689	8.27389	7.56885	8.36295	8.07654	7.66281	0.99247	7.36941	6.49395	6.95883	8.28668	7.58427	7.52966	8.01204	6.92461	7.35746	6.99761	6.89442	7.6799	7.09894	7.17394	7.16126	7.19303	7.55947	7.63557	7.49255	8.04627	8.27129	0.351994	0.405622	T	T	-1.1688	0.989989	0.997787	0.000256629	0.000319305	T	NM_014384; ENST00000281182; ENST00000374752; ENST00000524426; ENST00000524502; ENST00000524547; ENST00000524739; ENST00000525961; ENST00000526026; ENST00000527082; ENST00000527665; ENST00000527713; ENST00000528325; ENST00000530533; ENST00000531338; ENST00000533387; ENST00000534240; ENST00000534433; BC001964; OTTHUMT00000393607; OTTHUMT00000393608; OTTHUMT00000393609; OTTHUMT00000393610; OTTHUMT00…	chr11	+	Multiple_Complex	10	11q25
		acyl-CoA dehydrogenase family, member 9	TC0300008746.hg.1	ACAD9		9.29991	9.16451	9.16626	9.70055	9.29007	9.08776	0.466791	6.78638	7.13557	6.95223	9.562	9.56842	9.96093	9.66946	9.29207	9.55586	9.10834	9.11164	8.76577	8.94988	9.07626	8.72195	8.90404	8.63086	8.01828	8.23944	9.32824	9.16542	0.312233	0.0776729	T	T	1.11948	0.498698	0.798059	5.67e-10	1.38e-09	T	NM_014049; NR_033426; ENST00000308982; ENST00000505192; ENST00000505602; ENST00000505867; ENST00000508971; ENST00000511227; ENST00000511325; ENST00000511526; ENST00000512801; ENST00000514336; ENST00000514643; ENST00000515429; ENST00000620948; BC007970; BC013354; OTTHUMT00000358405; OTTHUMT00000358406; OTTHUMT00000358407; OTTHUMT00000358409; OTTHUMT00000358411; OTTHUMT00000358412; OTTHUMT000003584…	chr3	+	Multiple_Complex	10	3q21.3
		acyl-CoA dehydrogenase, long chain	TC0200015603.hg.1	ACADL		5.83255	5.82246	6.84017	6.04522	6.07081	6.12546	0.814978	4.95397	5.06078	4.86584	7.59225	7.44806	7.63817	7.44245	5.59265	5.59095	4.83896	4.48015	6.21621	6.31762	6.09708	6.74018	5.06667	5.67662	5.69771	5.54271	6.07582	5.82771	0.0409878	0.584684	T	T	1.18765	0.769745	0.928188	5.68e-08	1.04e-07	T	NM_001608; ENST00000233710; ENST00000482502; ENST00000482523; ENST00000498120; BC039063; BC064549; OTTHUMT00000256561; OTTHUMT00000336740; OTTHUMT00000336741; OTTHUMT00000336742	chr2	-	Multiple_Complex	10	2q34
		acyl-CoA dehydrogenase, C-4 to C-12 straight chain	TC0100018236.hg.1	ACADM		11.4102	11.8861	11.7967	11.4012	11.8679	11.8815	0.933043	9.98008	9.9849	10.6509	11.9207	12.0815	12.125	12.2033	10.4493	10.3263	10.474	10.419	11.6245	11.9829	11.7279	11.8547	10.4805	10.5363	10.4124	10.3401	11.8744	11.8258	0.273488	0.252941	T	T	1.03429	0.91263	0.97702	2.37e-11	7.28e-11	T	NM_000016; NM_001127328; NM_001286042; NM_001286043; NM_001286044; ENST00000370834; ENST00000370841; ENST00000420607; ENST00000473018; ENST00000481374; ENST00000525808; ENST00000525881; ENST00000526129; ENST00000526196; ENST00000526930; ENST00000529059; ENST00000530953; ENST00000532207; ENST00000532509; ENST00000534146; ENST00000534334; ENST00000541113; BC005377; OTTHUMT00000026967; OTTHUMT000000…	chr1	+	Multiple_Complex	10	1p31
		acyl-CoA dehydrogenase, C-2 to C-3 short chain	TC1200009141.hg.1	ACADS		7.13188	7.19927	7.67289	6.40766	7.10275	7.15807	0.206292	5.10853	4.50583	3.80716	9.60484	10.0796	9.39395	9.39167	6.21158	5.74164	6.41905	5.89107	6.87633	6.98268	7.70095	7.27883	5.67811	5.70861	5.54608	5.64704	7.12928	7.16695	0.418196	0.29483	T	T	-1.02645	0.0908727	0.383298	2.28e-14	1.33e-13	T	NM_000017; NM_001302554; ENST00000242592; ENST00000411593; ENST00000539690; BC025963; OTTHUMT00000402861; OTTHUMT00000402862; OTTHUMT00000402863	chr12	+	Multiple_Complex	10	12q24.31
		acyl-CoA dehydrogenase, short/branched chain	TC1000009169.hg.1	ACADSB		11.4835	10.8457	12.0171	9.11778	9.88268	10.5369	0.0393885	6.30756	6.44195	8.07031	10.6914	10.6082	11.0728	11.2709	6.47222	6.30058	6.62194	6.72954	7.55112	7.85099	8.46715	8.26844	6.4663	5.83615	6.28104	6.96929	9.85405	11.4567	0.710284	0.586498	T	T	-3.0371	9.91e-05	0.0108511	4.6e-14	2.49e-13	T	NM_001609; ENST00000358776; ENST00000368869; ENST00000411816; ENST00000541070; BC013756; OTTHUMT00000050843; OTTHUMT00000050844; OTTHUMT00000402204; OTTHUMT00000402205	chr10	+	Multiple_Complex	10	10q26.13
		acyl-CoA dehydrogenase, very long chain	TC1700006729.hg.1	ACADVL		13.1937	12.6503	13.041	11.8759	12.5591	12.2732	0.0470113	13.5525	13.5059	14.781	11.8019	11.8594	11.6787	11.5095	8.15535	8.02963	7.92253	8.00812	11.782	11.5872	11.9478	11.6587	10.4165	9.93854	10.0726	10.5708	12.2462	13.0117	0.343113	0.280209	T	T	-1.69993	0.00180722	0.0510016	6.57e-18	1.16e-16	T	NM_000018; NM_001033859; NM_001270447; NM_001270448; ENST00000322910; ENST00000350303; ENST00000356839; ENST00000542255; ENST00000543245; ENST00000577191; ENST00000577433; ENST00000577857; ENST00000578033; ENST00000578269; ENST00000578319; ENST00000578421; ENST00000578579; ENST00000578711; ENST00000578809; ENST00000578824; ENST00000579286; ENST00000579391; ENST00000579425; ENST00000579546; ENST00…	chr17	+	Multiple_Complex	10	17p13.1
		aggrecan	TC1500008236.hg.1	ACAN		3.41066	3.12764	3.75973	3.13604	3.63212	3.4675	0.933439	4.82416	4.06318	3.56923	3.63133	4.35016	3.67609	3.77268	3.30345	3.94975	2.92562	3.82047	3.6518	3.54264	4.07183	3.78805	3.40342	3.23366	3.65979	3.69308	3.43663	3.42744	0.252673	0.31662	F	F	1.00639	0.936323	0.98465	0.0238253	0.0254003	F	NM_001135; NM_013227; ENST00000352105; ENST00000439576; ENST00000558207; ENST00000558604; ENST00000558704; ENST00000559004; ENST00000560601; ENST00000561243; ENST00000617301; BC150624; OTTHUMT00000416265; OTTHUMT00000416267; OTTHUMT00000416268; OTTHUMT00000416269; OTTHUMT00000416270; OTTHUMT00000416271; OTTHUMT00000418839; uc010upo.1	chr15	+	Multiple_Complex	10	15q26.1
		ArfGAP with coiled-coil, ankyrin repeat and PH domains 1	TC1700006740.hg.1	ACAP1		5.67477	5.69133	5.33214	5.31906	5.60926	5.56042	0.660549	7.60332	7.62267	7.70161	5.69992	5.28937	5.35747	6.04707	5.74149	5.88483	5.10517	6.30015	6.28268	6.26277	6.10656	6.43121	9.22469	8.60508	8.82549	8.45475	5.58377	5.68271	0.155379	0.202767	T	T	-1.07099	0.787906	0.935611	4.97e-12	1.74e-11	T	NM_014716; ENST00000158762; ENST00000570439; ENST00000570457; ENST00000570504; ENST00000571220; ENST00000571471; ENST00000573893; ENST00000574499; ENST00000575415; ENST00000575425; ENST00000576594; ENST00000576628; BC018543; OTTHUMT00000220049; OTTHUMT00000440564; OTTHUMT00000440574; OTTHUMT00000440575; OTTHUMT00000440576; OTTHUMT00000440578; OTTHUMT00000440579; OTTHUMT00000440580; OTTHUMT0000044…	chr17	+	Multiple_Complex	10	17p13.1
		ArfGAP with coiled-coil, ankyrin repeat and PH domains 2	TC0300013635.hg.1	ACAP2		9.40257	8.77554	9.24136	9.39902	8.81256	8.60484	0.543503	7.44508	9.36722	8.48295	9.20244	8.70626	9.17857	8.80637	9.41469	9.41864	9.28801	9.43851	8.72935	8.55525	9.11972	8.82808	10.5866	10.2635	10.1663	10.3387	8.84639	9.21679	0.411867	0.325613	T	T	-1.29271	0.368212	0.713014	6.66e-08	1.21e-07	T	NM_012287; ENST00000326793; ENST00000423531; ENST00000439666; ENST00000439758; ENST00000447662; ENST00000450200; ENST00000466876; ENST00000471593; ENST00000472860; ENST00000475905; ENST00000480906; ENST00000481463; ENST00000484296; ENST00000490224; ENST00000618471; BC060767; OTTHUMT00000342126; OTTHUMT00000342127; OTTHUMT00000342128; OTTHUMT00000342129; OTTHUMT00000342130; OTTHUMT00000342131; OTT…	chr3	-	Multiple_Complex	10	3q29
		Transcript Identified by AceView, Entrez Gene ID(s) 23527; ACAP2 intronic transcript 1 (non-protein coding) [Source:HGNC Symbol;Acc:HGNC:41426]; novel transcript; ACAP2 intronic transcript 1 [Source:HGNC Symbol;Acc:HGNC:41426]	TC0300013636.hg.1	ACAP2; ACAP2-IT1; AC090018.3		5.28917	3.40651	4.72786	5.96826	4.9229	4.46542	0.417611	3.87418	5.65173	6.14598	4.58401	3.57987	5.06414	4.12457	4.78645	5.06952	4.75062	3.94899	3.92568	4.57106	4.08459	4.27911	6.09307	6.02147	6.56397	6.0716	5.01425	4.6158	0.770346	0.966561	T	T	1.31809	0.141086	0.47182	0.000216345	0.000270833	T	ACAP2.oAug10; ENST00000419899.1; OTTHUMT00000342226; uc062rqs.1	chr3	-	NonCoding	10
		ArfGAP with coiled-coil, ankyrin repeat and PH domains 3	TC0100012463.hg.1	ACAP3		7.68877	7.34548	7.20964	7.7971	6.98792	7.76418	0.75181	6.03885	7.51462	7.22246	7.15396	7.69452	6.51539	7.49223	7.09171	6.79395	6.87892	6.70603	8.36286	8.24364	7.55431	7.66282	6.81505	7.17358	7.41105	7.3869	7.77997	7.37179	0.457973	0.246937	T	T	1.32701	0.724846	0.913042	0.00242581	0.00277428	T	NM_030649; ENST00000353662; ENST00000354700; ENST00000354980; ENST00000379037; ENST00000438966; ENST00000467278; ENST00000470659; ENST00000472541; ENST00000476572; ENST00000478065; ENST00000479108; ENST00000492936; ENST00000493992; BC051194; OTTHUMT00000006366; OTTHUMT00000006367; OTTHUMT00000006368; OTTHUMT00000006369; OTTHUMT00000006370; OTTHUMT00000006371; OTTHUMT00000006372; OTTHUMT0000000637…	chr1	-	Multiple_Complex	10
		acetyl-CoA acetyltransferase 1	TC1100008983.hg.1	ACAT1		13.3956	12.7708	13.2455	11.4764	12.7674	12.547	0.118599	7.36125	7.81685	8.1966	15.5791	15.8137	15.5214	15.535	11.5444	11.6587	11.7191	11.3583	12.221	12.254	12.2801	12.2353	9.82818	9.45216	9.39822	9.38908	12.6507	13.2312	0.690548	0.326173	T	T	-1.49537	0.00171019	0.0501096	1.38e-18	3.16e-17	T	NM_000019; ENST00000265838; ENST00000299355; ENST00000524833; ENST00000526119; ENST00000527942; ENST00000528370; ENST00000531813; ENST00000531853; ENST00000532792; ENST00000533597; ENST00000533610; ENST00000534773; OTTHUMT00000389474; OTTHUMT00000389475; OTTHUMT00000389476; OTTHUMT00000389477; OTTHUMT00000389478; OTTHUMT00000389479; OTTHUMT00000389480; OTTHUMT00000389481; OTTHUMT00000389482; OTTH…	chr11	+	Multiple_Complex	10	11q22.3
		acetyl-CoA acetyltransferase 2	TC0600010057.hg.1	ACAT2		7.64991	7.27076	7.15621	8.7304	9.01748	9.11854	0.00107887	6.68786	6.86917	7.13351	12.5144	12.1119	12.1773	12.5638	7.53273	7.12443	7.26824	7.77327	6.48525	5.37653	5.62602	6.12954	6.45566	6.82526	6.29505	6.18595	9.00128	7.27708	0.201362	0.258398	T	T	3.30395	2.54e-06	0.00129813	2.56e-17	3.67e-16	T	NM_001303253; NM_005891; ENST00000367048; ENST00000467951; ENST00000472052; BC000408; OTTHUMT00000042912; OTTHUMT00000042913; OTTHUMT00000042914	chr6	+	Multiple_Complex	10	6q25.3
		acyl-CoA binding domain containing 3	TC0100017519.hg.1	ACBD3		9.60556	9.86526	9.95531	9.83852	10.158	9.68088	0.657539	7.65937	9.66718	9.23678	10.6046	10.8276	10.5316	10.8884	10.5843	10.6114	10.6512	10.5886	10.8776	10.9109	10.921	10.721	10.4731	10.4905	10.2245	10.1687	9.86824	9.85144	0.243092	0.181603	T	T	1.01171	0.626302	0.868321	8.48e-11	2.36e-10	T	NM_022735; ENST00000366812; ENST00000464927; BC045533; BC060792; OTTHUMT00000091528; OTTHUMT00000099044	chr1	-	Multiple_Complex	10	1q42.12
		acyl-CoA binding domain containing 4	TC1700008032.hg.1	ACBD4		6.18939	6.14403	5.42539	5.81349	6.6375	6.17304	0.448608	7.98681	6.86276	6.92995	9.53828	9.32766	9.32998	9.33643	5.03054	4.62654	4.54113	4.75423	4.95141	5.65706	4.88759	5.23004	6.23611	6.53042	6.17588	5.33956	6.19924	6.16579	0.413116	0.428602	T	T	1.02346	0.31286	0.669804	2.47e-13	1.14e-12	T	NM_001135704; NM_001135705; NM_001135706; NM_001135707; NM_024722; ENST00000321854; ENST00000376955; ENST00000398322; ENST00000431281; ENST00000585553; ENST00000586279; ENST00000586346; ENST00000587111; ENST00000587976; ENST00000589752; ENST00000589798; ENST00000590289; ENST00000591136; ENST00000591859; ENST00000592162; ENST00000619916; BC029164; BC041143; OTTHUMT00000449807; OTTHUMT00000449808; …	chr17	+	Multiple_Complex	10	17q21.31
		acyl-CoA binding domain containing 5	TC1000010117.hg.1	ACBD5		9.75613	9.9884	10.3428	9.45994	9.50288	9.9528	0.16792	5.6046	7.15976	7.13879	10.3771	10.4042	10.0448	10.2589	9.61606	9.7447	9.56266	9.77547	9.48056	9.58417	10.0212	9.31512	8.78898	8.79666	8.8807	9.41456	9.48228	10.0166	0.273003	0.295419	T	T	-1.44826	0.0835749	0.367008	8.92e-13	3.62e-12	T	NM_001042473; NM_001271512; NM_001301251; NM_001301252; NM_001301253; NM_001301254; NM_145698; ENST00000375888; ENST00000375897; ENST00000375901; ENST00000375905; ENST00000396271; ENST00000412279; ENST00000426079; ENST00000476758; BC030555; OTTHUMT00000047310; OTTHUMT00000047311; OTTHUMT00000047312; OTTHUMT00000047313; OTTHUMT00000047314; OTTHUMT00000047315; OTTHUMT00000047316	chr10	-	Multiple_Complex	10	10p12.1
		acyl-CoA binding domain containing 6	TC0100018540.hg.1	ACBD6		7.7924	6.86243	7.32525	7.05795	8.09032	7.58683	0.564424	9.84869	10.6727	11.0327	6.34499	6.86128	6.87774	6.572	9.00248	9.0323	8.75853	8.61217	7.33835	6.5763	6.73713	6.2858	7.01282	7.07399	5.63275	6.7416	7.58005	7.32642	0.516237	0.464987	T	T	1.19221	0.463202	0.777557	2.1e-10	5.45e-10	T	NM_032360; BC006505; OTTHUMT00000084998; OTTHUMT00000084999	chr1	-	Multiple_Complex	10	1q25.3
		acyl-CoA binding domain containing 7	TC1000012525.hg.1	ACBD7		4.90636	3.98057	4.79387	5.06342	4.47138	4.81083	0.548247	4.48899	4.70314	5.77508	4.78911	4.98229	5.83551	5.63605	6.72673	6.32191	6.49322	6.29751	4.99061	5.34916	4.26273	4.67923	3.54823	4.10973	5.35416	4.6123	4.78948	4.84782	0.29708	0.505173	T	T	-1.04127	0.554035	0.827888	9.05e-05	0.000117103	T	NM_001039844; ENST00000356189; ENST00000496890; BC029526; OTTHUMT00000046972; OTTHUMT00000313988	chr10	-	Multiple_Complex	10	10p13
		1-aminocyclopropane-1-carboxylate synthase homolog (inactive)	TC1100007387.hg.1	ACCS		4.31602	4.5852	4.52063	4.87301	5.40783	4.52095	0.164009	5.6372	5.92496	6.80247	5.24234	5.20957	4.52796	5.10168	4.25709	4.64367	4.03218	4.3066	4.62047	3.63316	4.04198	4.48526	4.93851	4.5868	3.87935	4.18351	4.91533	4.51457	0.446568	0.14053	F	F	1.3202	0.125335	0.445265	1.25e-05	1.75e-05	F	NM_001127219; NM_032592; ENST00000263776; ENST00000524990; ENST00000526577; ENST00000527346; ENST00000527557; ENST00000527603; ENST00000531190; ENST00000531505; ENST00000531940; ENST00000532122; ENST00000533208; ENST00000533404; ENST00000534035; BC020197; OTTHUMT00000389720; OTTHUMT00000389721; OTTHUMT00000389722; OTTHUMT00000389723; OTTHUMT00000389749; OTTHUMT00000389750; OTTHUMT00000389751; OTT…	chr11	+	Multiple_Complex	10	11p11
		1-aminocyclopropane-1-carboxylate synthase (inactive)-like	TC1100007386.hg.1	ACCSL		2.36634	3.29876	2.88007	3.28472	3.1772	3.10995	0.280351	4.92129	3.86564	3.98328	3.35368	3.09297	3.14642	3.99046	2.82123	3.10726	2.72795	3.00198	3.97323	3.23025	3.31646	3.34412	3.21186	3.44545	3.39256	3.24422	3.18625	2.85588	0.0881548	0.467017	F	F	1.25734	0.177116	0.527829	0.000190515	0.000239391	F	NM_001031854; ENST00000378832; ENST00000527145; OTTHUMT00000389717; OTTHUMT00000389718; uc001mxw.1	chr11	+	Multiple_Complex	10	11p11.2
		adrenocortical dysplasia homolog (mouse)	TC1600010647.hg.1	ACD		7.47337	7.74816	7.3629	7.08799	7.19748	7.51998	0.207782	5.71723	7.95793	7.47734	6.77494	6.10419	7.06491	6.82596	8.15792	7.97609	8.03232	8.42631	6.93464	6.81345	7.26636	7.22327	7.85992	8.22027	7.52173	8.04363	7.21309	7.495	0.224577	0.198384	T	T	-1.21581	0.275072	0.634928	4.89e-07	7.99e-07	T	NM_001082486; NM_001082487; NM_022914; ENST00000219251; ENST00000393919; ENST00000602320; ENST00000602382; ENST00000602423; ENST00000602519; ENST00000602622; ENST00000602656; ENST00000602780; ENST00000602821; ENST00000602850; ENST00000602860; ENST00000602945; ENST00000620338; ENST00000620761; BC016904; OTTHUMT00000268880; OTTHUMT00000268881; OTTHUMT00000467870; OTTHUMT00000467871; OTTHUMT00000467…	chr16	-	Multiple_Complex	10	16q22.1
		angiotensin I converting enzyme	TC1700012291.hg.1	ACE		3.53178	3.53819	2.55639	6.10674	3.57981	4.21096	0.160029	4.68791	4.96823	3.76303	4.86585	5.42677	4.9732	5.80993	10.257	10.3656	10.5322	10.2668	4.70745	4.3328	4.97577	4.2899	4.79116	4.31927	4.15569	4.68825	4.29368	3.53485	1.31515	0.565001	T	F	1.69211	0.0025725	0.0619249	3.54e-13	1.57e-12	F	NM_000789; NM_001178057; NM_152830; ENST00000290863; ENST00000290866; ENST00000413513; ENST00000428043; ENST00000577418; ENST00000578679; ENST00000578839; ENST00000579204; ENST00000579314; ENST00000579409; ENST00000579462; ENST00000579726; ENST00000580318; ENST00000582005; ENST00000582244; ENST00000582627; ENST00000582678; ENST00000582761; ENST00000583336; ENST00000583645; ENST00000584529; ENST00…	chr17	+	Multiple_Complex	10	17q23.3
		angiotensin I converting enzyme 2	TC0X00009128.hg.1	ACE2		3.49865	3.68849	5.01814	4.303	4.44098	4.81885	0.418552	6.64163	5.52436	4.58605	4.02446	4.65858	3.61852	4.67545	9.79529	9.89725	9.9381	9.97377	4.16539	4.23309	3.83956	4.1701	3.80966	3.60849	4.38475	3.97766	4.46504	3.59744	0.26706	0.827935	F	F	1.82463	0.165362	0.510314	2.69e-15	2.01e-14	F	NM_021804; ENST00000252519; ENST00000427411; ENST00000471548; ENST00000473851; ENST00000484756; BC039902; BC048094; OTTHUMT00000055867; OTTHUMT00000055868; OTTHUMT00000055869; OTTHUMT00000055870; uc004cxb.2	chrX	-	Multiple_Complex	10	Xp22
		alkaline ceramidase 1	TC1900009421.hg.1	ACER1		3.63621	3.59056	3.40202	3.57501	3.2865	3.71372	0.907827	5.00526	5.44369	4.60685	3.61653	4.02038	3.72965	3.91736	3.57873	3.22384	3.58243	3.78715	3.89237	4.0339	4.14728	3.94324	4.2279	4.22734	3.86225	4.02465	3.54834	3.60192	0.217943	0.124148	F	F	-1.03783	0.922418	0.980948	4.04e-07	6.66e-07	F	NM_133492; ENST00000301452; BC112122; BC112124; OTTHUMT00000452982	chr19	-	Coding	10	19p13.3
		alkaline ceramidase 2	TC0900006762.hg.1	ACER2		5.56215	6.21955	5.85976	5.19478	6.26329	5.90039	0.809718	4.7834	5.10268	4.37411	5.61696	5.62873	5.92067	5.71066	5.75847	5.47922	5.49731	5.50459	6.6178	6.47167	5.81374	5.374	5.38964	5.97921	6.13977	5.566	5.83457	5.87567	0.543338	0.32919	T	T	-1.0289	0.750714	0.922183	0.00814782	0.00896269	T	NM_001010887; ENST00000340967; BC092487; OTTHUMT00000051864	chr9	+	Multiple_Complex	10	9p22.1
		alkaline ceramidase 3	TC1100008518.hg.1	ACER3		7.13633	7.33902	7.38673	7.2353	7.13989	7.14943	0.244613	5.85157	5.00017	6.66327	7.3786	7.82374	7.71759	8.60432	8.63767	8.61547	9.02146	8.54532	7.40905	6.58075	6.95863	6.14881	9.05731	9.29427	9.14561	9.17919	7.14485	7.35314	0.052548	0.132953	T	T	-1.15532	0.682149	0.895183	1.26e-10	3.41e-10	T	NM_001300953; NM_001300954; NM_001300955; NM_018367; ENST00000278544; ENST00000525194; ENST00000525325; ENST00000525861; ENST00000526597; ENST00000527508; ENST00000530182; ENST00000530334; ENST00000530921; ENST00000531352; ENST00000531461; ENST00000532485; ENST00000533873; ENST00000534206; BC073853; OTTHUMT00000382770; OTTHUMT00000382771; OTTHUMT00000382772; OTTHUMT00000382773; OTTHUMT00000382774…	chr11	+	Multiple_Complex	10	11q13.5
		acetylcholinesterase (Yt blood group)	TC0700013599.hg.1	ACHE		7.21355	6.39806	6.73678	7.70162	6.921	7.05665	0.259048	7.69816	7.00596	7.43646	6.96913	6.13058	6.81222	6.80569	6.56207	6.57604	6.11073	6.34481	9.29055	8.33735	8.21645	8.14834	6.91687	6.7754	7.33709	7.15201	6.99498	6.77001	0.417084	0.409688	T	T	1.16875	0.143756	0.475963	3.8e-06	5.64e-06	T	NM_000665; NM_001282449; NM_001302621; NM_001302622; NM_015831; ENST00000241069; ENST00000302913; ENST00000411582; ENST00000412389; ENST00000419336; ENST00000426415; ENST00000428317; ENST00000430554; ENST00000440755; ENST00000442452; ENST00000454485; BC105060; BC105062; BC143469; OTTHUMT00000347189; OTTHUMT00000347190; OTTHUMT00000347191; OTTHUMT00000347194; OTTHUMT00000347196; OTTHUMT00000347197…	chr7	-	Coding	10	7q22
		acetylcholinesterase (Yt blood group)	TC0700013600.hg.1	ACHE		3.05219	2.80127	2.91021	3.02269	2.67153	2.92931	0.733009	2.80907	3.03988	2.74476	3.48604	3.71625	3.16582	3.52557	3.08174	2.77661	3.20185	3.28173	3.67593	3.86245	3.49602	3.87977	3.60691	3.1659	3.07045	3.26134	2.91328	2.91843	0.181881	0.125822	F	F	-1.00358	0.810647	0.944009	0.000706077	0.000841237	F	ENST00000619863; OTTHUMT00000347193	chr7	-	NonCoding	10	7q22
		Transcript Identified by AceView, Entrez Gene ID(s) 22985	TC1400008698.hg.1	ACIN1		6.51779	5.60817	5.32589	6.11	5.61463	5.70451	0.985464	8.88166	9.19461	8.76284	5.29783	6.60587	5.87856	5.36234	5.82957	5.97958	5.59144	5.60333	5.94522	5.68282	6.1078	5.49395	6.17307	5.64644	6.80588	6.38551	5.66936	5.63063	0.26391	0.622858	T	T	1.02721	0.981846	0.99585	1.97e-08	3.83e-08	T	ACIN1.vhAug10-unspliced	chr14	-	Unassigned	6
		apoptotic chromatin condensation inducer 1	TC1400008694.hg.1	ACIN1		9.87228	9.90756	9.47476	9.83546	9.87926	9.75568	0.642279	7.84661	8.72569	9.12676	8.80798	9.66342	8.874	9.03287	9.49138	9.43933	9.34253	9.40396	9.92142	10.2471	10.174	10.0414	9.58892	9.49713	8.74604	9.29566	9.82811	9.8892	0.0626568	0.240341	T	T	-1.04326	0.749934	0.9218	6.09e-06	8.86e-06	T	NM_001164814; NM_001164815; NM_001164816; NM_001164817; NM_014977; ENST00000262710; ENST00000338631; ENST00000357481; ENST00000397341; ENST00000457657; ENST00000473758; ENST00000553501; ENST00000553721; ENST00000553790; ENST00000554680; ENST00000554708; ENST00000554979; ENST00000555053; ENST00000555352; ENST00000555395; ENST00000555478; ENST00000555566; ENST00000555807; ENST00000556052; ENST00000…	chr14	-	Multiple_Complex	10	14q11.2
		atypical chemokine receptor 1 (Duffy blood group)	TC0100018307.hg.1	ACKR1		4.36579	3.96217	4.10771	4.98786	3.83435	3.46278	0.920723	6.50728	6.32008	6.78005	3.17693	2.98564	3.21099	3.27173	8.6985	8.65892	8.45355	8.32431	8.87303	8.09069	9.1969	8.9886	10.0557	10.3815	10.4526	9.99814	3.87488	4.13121	0.795248	0.204408	F	F	-1.19443	0.866638	0.965191	6.16e-18	1.1e-16	F	NM_001122951; NM_002036; ENST00000368121; ENST00000368122; ENST00000435307; BC017817; OTTHUMT00000090338; OTTHUMT00000090339; OTTHUMT00000090340	chr1	+	Coding	10	1q21-q22
		atypical chemokine receptor 2	TC0300013813.hg.1	ACKR2		5.90624	6.16075	5.7575	5.55283	6.21782	6.2797	0.787137	5.97308	5.99622	5.21768	10.0321	9.4549	9.25633	10.2407	5.92069	5.60277	5.32325	6.26144	5.55342	5.65133	5.72249	5.9797	6.20694	6.28431	6.70953	6.54393	6.2475	5.92894	0.402985	0.203924	T	T	1.24708	0.780868	0.93342	3.5e-13	1.56e-12	T	NM_001296; ENST00000273145; ENST00000422265; ENST00000442925; ENST00000460855; ENST00000463699; ENST00000480215; ENST00000492609; ENST00000493193; ENST00000494619; ENST00000497921; ENST00000498111; ENST00000565749; BC008816; BC011631; BC020558; BC101629; BC112045	chr3	+	Multiple_Complex	10	3p21.3
		atypical chemokine receptor 3	TC0200011219.hg.1	ACKR3		5.78635	4.8882	6.22923	5.14156	4.88071	5.06603	0.206709	5.85306	4.92697	5.6243	11.4069	11.5793	11.6176	11.2494	9.59381	9.61992	9.73498	9.36707	10.7696	10.732	10.8671	10.9952	14.9366	14.8843	14.8755	15.016	5.05112	5.70282	0.134221	0.683274	T	T	-1.57102	0.014911	0.153977	5.78e-23	9.54e-21	T	NM_020311; ENST00000272928; ENST00000447924; BC036661; OTTHUMT00000257079; OTTHUMT00000329276	chr2	+	Multiple_Complex	10	2q37.3
		atypical chemokine receptor 4	TC0300008847.hg.1	ACKR4		4.56632	5.02588	5.12667	4.37017	5.13483	4.84624	0.686156	6.25299	7.65875	7.8418	4.81243	5.16668	3.50726	3.71493	3.50236	3.93334	3.34826	4.13792	5.73359	4.82799	5.62346	6.11382	4.54911	4.87545	4.94548	3.94887	4.80496	5.0668	0.386142	0.298704	T	T	-1.19901	0.75287	0.922804	2.05e-07	3.49e-07	T	NM_016557; NM_178445; ENST00000249887; ENST00000509820; BC069438; OTTHUMT00000357238; OTTHUMT00000358320	chr3	+	Coding	10	3q22
		ATP citrate lyase	TC1700010693.hg.1	ACLY		11.3613	10.515	11.1662	11.19	11.4332	11.1921	0.391378	9.54396	10.1601	9.96808	13.7918	13.8055	13.938	13.9059	11.2139	11.1424	11.4245	11.4715	10.0758	10.2357	10.1582	9.89023	12.0885	12.0125	12.1575	12.0399	11.1911	11.1569	0.139789	0.443181	T	T	1.02396	0.183966	0.535133	2e-15	1.55e-14	T	NM_001096; NM_001303274; NM_001303275; NM_198830; ENST00000352035; ENST00000353196; ENST00000393896; ENST00000537919; ENST00000588547; ENST00000588779; ENST00000590151; ENST00000590735; ENST00000590770; ENST00000592970; BC006195; OTTHUMT00000257465; OTTHUMT00000257466; OTTHUMT00000449109; OTTHUMT00000449110; OTTHUMT00000449111; OTTHUMT00000449112; OTTHUMT00000449113; OTTHUMT00000449114; OTTHUMT00…	chr17	-	Multiple_Complex	10	17q21.2
		aminocarboxymuconate semialdehyde decarboxylase	TC0200009424.hg.1	ACMSD		6.73973	6.68065	6.96608	6.80115	7.26573	7.05207	0.201641	7.94083	7.66217	7.10774	12.0947	12.0773	11.8002	12.0516	6.24395	6.45328	6.35495	6.07016	6.95459	6.51855	6.70615	7.00571	6.75509	6.76617	6.85213	6.54073	7.04244	6.73218	0.232539	0.150663	T	T	1.23993	0.187182	0.538532	8.09e-20	3.05e-18	T	NM_001307983; NM_138326; ENST00000356140; ENST00000392928; ENST00000485893; ENST00000498093; BC016018; BC107420; OTTHUMT00000254627; OTTHUMT00000254628; OTTHUMT00000312868; OTTHUMT00000337380	chr2	+	Multiple_Complex	10	2q21.3
		aconitase 1, soluble	TC0900006937.hg.1	ACO1		10.9346	11.1452	11.0392	10.0549	10.7759	10.779	0.112846	9.83656	10.3448	11.3834	14.216	14.1717	14.2117	14.0846	10.2453	10.1911	10.5611	10.5576	9.48689	9.83051	10.0829	10.1419	9.50303	9.33993	9.43832	9.23662	10.7774	11.0396	0.417185	0.105316	T	T	-1.19928	0.021522	0.183979	1.79e-16	1.89e-15	T	NM_001278352; NM_002197; ENST00000309951; ENST00000379923; ENST00000541043; BC018103; OTTHUMT00000051998; OTTHUMT00000051999	chr9	+	Multiple_Complex	10	9p21.1
		aconitase 2, mitochondrial	TC2200007477.hg.1	ACO2		11.587	11.7277	12.0909	10.9406	11.3539	11.8488	0.23653	11.0267	10.5511	11.5661	12.2206	12.1385	11.8239	11.6318	11.0875	11.0458	10.9229	11.2987	13.1601	13.3432	13.5612	13.4655	11.0868	10.8955	10.7888	10.5801	11.3749	11.7545	0.45472	0.260047	T	T	-1.30097	0.071262	0.339381	2.79e-10	7.11e-10	T	NM_001098; ENST00000216254; ENST00000396512; ENST00000466237; ENST00000471094; ENST00000478010; ENST00000481310; ENST00000482208; BC014092; BC026196; OTTHUMT00000259151; OTTHUMT00000259152; OTTHUMT00000259153; OTTHUMT00000259154; OTTHUMT00000259155; OTTHUMT00000259156; OTTHUMT00000259157; uc003bac.3	chr22	+	Multiple_Complex	10	22q13.2
		acyl-CoA thioesterase 1	TC1400007644.hg.1	ACOT1		7.88181	8.70958	8.27024	7.79911	8.63396	8.98583	0.684929	8.12532	8.05395	8.82514	9.72757	9.94221	9.98494	9.54353	7.05872	6.48959	6.23954	6.833	8.50432	7.31839	7.75089	7.52331	6.39363	6.11239	5.97642	6.7674	8.56379	8.28355	0.609521	0.414146	T	T	1.2144	0.563512	0.833483	8.14e-10	1.93e-09	T	NM_001037161; ENST00000311148; ENST00000557556; BC127747; BC127748; BC132889; BC132891; BC143042; BC144425; OTTHUMT00000414432; OTTHUMT00000414433	chr14	+	Coding	10	14q24.3
		acyl-CoA thioesterase 11	TC0100008398.hg.1	ACOT11		6.82498	6.46329	5.83826	5.89032	4.65009	5.22465	0.0714714	5.04988	5.39962	4.65898	4.05851	4.59332	5.20287	4.70717	4.96827	3.99132	4.46548	4.70296	5.17729	4.81227	4.97267	5.18428	4.60403	4.64062	4.59272	4.13019	5.24829	6.40719	0.620672	0.499182	F	T	-2.23287	0.0016922	0.0497863	9.79e-05	0.00012629	F	NM_015547; NM_147161; ENST00000343744; ENST00000371316; ENST00000479837; ENST00000481208; ENST00000498228; BC093844; BC093846; OTTHUMT00000027351; OTTHUMT00000027352; OTTHUMT00000027353; OTTHUMT00000027354; OTTHUMT00000027356	chr1	+	Multiple_Complex	10	1p32.3
		acyl-CoA thioesterase 12	TC0500011296.hg.1	ACOT12		3.87361	3.63953	3.59101	3.87393	3.39197	3.3114	0.421127	2.98605	4.03491	3.54643	8.17686	7.41821	8.62321	8.40221	3.20094	2.75086	2.83917	3.27486	3.08275	3.68529	3.73793	3.86924	3.35818	3.31754	3.11761	4.09764	3.35333	3.61691	0.304198	0.151113	F	F	-1.20046	0.546888	0.823601	2.09e-14	1.22e-13	F	NM_130767; ENST00000307624; ENST00000506440; ENST00000508234; ENST00000513751; BC075010; BC075011; OTTHUMT00000254074; OTTHUMT00000369693; OTTHUMT00000369694; OTTHUMT00000369695	chr5	-	Multiple_Complex	10	5q14.1
		acyl-CoA thioesterase 13	TC0600007203.hg.1	ACOT13		12.243	11.6965	12.3801	11.2406	11.7854	11.7109	0.121982	10.4513	11.1585	11.6029	13.6292	13.6295	13.5788	13.6853	13.8113	13.9681	14.0479	13.9955	11.7588	11.6485	11.5084	11.6789	10.6049	10.0212	10.1842	10.0999	11.7466	12.2691	0.295385	0.361629	T	T	-1.43644	0.0132972	0.145444	2.84e-15	2.1e-14	T	NM_001160094; NM_018473; ENST00000230048; ENST00000476436; ENST00000537591; BC000894; OTTHUMT00000040010; OTTHUMT00000040011	chr6	+	Multiple_Complex	10	6p22.3
		acyl-CoA thioesterase 2	TC1400007647.hg.1	ACOT2		9.13515	9.81785	9.33396	8.66743	9.84177	9.95968	0.901408	6.68625	8.81784	9.18404	11.3152	11.3812	11.2113	11.1473	7.83809	7.06844	7.1277	7.93189	8.59151	9.15824	8.82292	8.83298	7.39524	6.95729	7.42156	7.29379	9.89832	9.37331	0.71448	0.35113	T	T	1.43894	0.83603	0.954649	3.26e-12	1.18e-11	T	NM_006821; NR_046028; ENST00000238651; ENST00000538782; ENST00000557857; ENST00000613168; ENST00000622407; BC006335; OTTHUMT00000414434; OTTHUMT00000414435; OTTHUMT00000415540; OTTHUMT00000476209	chr14	+	Multiple_Complex	10	14q24.3
		acyl-CoA thioesterase 4	TC1400007649.hg.1	ACOT4		3.8254	4.85862	3.83732	4.52545	4.59615	4.90055	0.238342	4.21493	4.00319	4.59236	9.21711	8.64049	8.95377	8.80565	4.44589	4.41346	4.55751	4.57303	4.59942	4.50272	4.63013	4.44787	4.80071	4.64736	4.84122	5.22953	4.57365	3.8316	0.199315	0.593119	F	F	1.67254	0.0403162	0.253907	8.13e-16	7.06e-15	F	NM_152331; ENST00000326303; BC090945; BC117341; BC117343; OTTHUMT00000404298	chr14	+	Coding	10	14q24.3
		acyl-CoA thioesterase 6	TC1400007650.hg.1	ACOT6		3.56046	3.1087	3.19557	3.39383	2.87514	3.2112	0.566572	4.9391	4.69441	5.31822	3.84872	4.34331	3.86503	4.29435	3.31413	2.88016	2.96912	2.91393	4.29554	3.97654	3.72098	3.65566	3.72778	3.27721	3.20531	3.07448	3.18014	3.17147	0.2631	0.239714	F	F	1.00603	0.570951	0.838062	1.2e-07	2.11e-07	F	NM_001037162; ENST00000381139; ENST00000554229; BC126378; BC126380; OTTHUMT00000414436; OTTHUMT00000414437; uc001xop.3	chr14	+	Coding	10	14q24.3
		acyl-CoA thioesterase 7	TC0100012675.hg.1	ACOT7		8.36261	7.17745	8.72137	9.70092	6.77446	7.25483	0.870501	6.30177	6.19164	6.52443	8.32856	8.08098	8.48664	8.23687	9.67216	9.68641	9.57901	9.34907	7.92118	7.78006	6.75373	7.10653	8.71978	8.47994	8.72971	8.50027	7.02444	8.34219	1.56941	0.807981	T	T	-2.49276	0.719849	0.910176	7.85e-05	0.000102182	T	NM_007274; NM_181864; NM_181865; NM_181866; ENST00000361521; ENST00000377842; ENST00000377845; ENST00000377855; ENST00000377860; ENST00000418124; ENST00000473466; ENST00000481175; ENST00000545482; ENST00000608083; BC017365; OTTHUMT00000003773; OTTHUMT00000003774; OTTHUMT00000003775; OTTHUMT00000003776; OTTHUMT00000003777; OTTHUMT00000003778; OTTHUMT00000003779; OTTHUMT00000003780; OTTHUMT00000473…	chr1	-	Multiple_Complex	10	1p36
		acyl-CoA thioesterase 8	TC2000009245.hg.1	ACOT8		9.4581	9.03676	9.49728	8.50437	8.87103	9.03749	0.0711731	9.19513	10.5832	11.4153	8.10014	8.65971	8.55668	8.19681	8.23381	8.10275	8.04995	8.18198	6.90769	7.77429	7.46039	7.29991	7.99057	8.12039	7.89695	8.16728	8.83806	9.47689	0.272753	0.255324	T	T	-1.55706	0.0222096	0.186951	1.7e-11	5.37e-11	T	NM_005469; ENST00000217455; ENST00000426915; ENST00000457981; ENST00000461272; ENST00000481938; ENST00000483141; ENST00000484783; ENST00000484975; ENST00000486165; ENST00000487205; ENST00000488679; ENST00000493118; BC117155; BC117157; OTTHUMT00000080338; OTTHUMT00000080339; OTTHUMT00000080340; OTTHUMT00000080341; OTTHUMT00000080342; OTTHUMT00000280525; OTTHUMT00000280526; OTTHUMT00000354792; OTTH…	chr20	-	Multiple_Complex	10	20q13.12
		acyl-CoA thioesterase 9	TC0X00009250.hg.1	ACOT9		9.20241	9.21701	9.04093	9.09386	9.30679	9.46594	0.328051	6.65326	6.98461	6.9486	9.08654	8.91923	8.93807	8.97766	6.76887	6.62375	6.97705	7.08865	9.71293	10.4224	10.4821	10.3035	8.92926	9.10501	8.89008	9.07857	9.29355	9.20941	0.186687	0.0977181	T	T	1.06005	0.485902	0.791015	1.23e-14	7.65e-14	T	NM_001033583; NM_001037171; ENST00000336430; ENST00000379295; ENST00000379297; ENST00000379303; ENST00000449612; ENST00000473710; ENST00000492081; ENST00000494361; BC136671; BC144360; OTTHUMT00000056065; OTTHUMT00000056067; OTTHUMT00000056068; OTTHUMT00000056069; OTTHUMT00000056070; OTTHUMT00000355289; OTTHUMT00000355290; OTTHUMT00000355291	chrX	-	Multiple_Complex	10	Xp22.11
		acyl-CoA oxidase 1, palmitoyl	TC1700011779.hg.1	ACOX1		9.30557	9.74762	9.61255	8.77292	9.29241	9.47092	0.201899	6.09456	6.10658	6.7478	12.0973	12.6096	11.9388	11.999	8.26245	8.23607	8.94098	8.67803	9.51214	9.85386	10.4654	9.97957	9.65456	9.30192	9.10847	8.85123	9.26584	9.58559	0.362615	0.226528	T	T	-1.24811	0.172393	0.521845	2.77e-14	1.58e-13	T	NM_001185039; NM_004035; NM_007292; ENST00000293217; ENST00000301608; ENST00000572047; ENST00000573078; ENST00000576743; ENST00000587927; ENST00000588176; ENST00000588968; ENST00000589301; ENST00000589744; ENST00000591857; ENST00000591963; ENST00000592329; BC008767; BC010425; OTTHUMT00000439500; OTTHUMT00000439501; OTTHUMT00000439502; OTTHUMT00000439503; OTTHUMT00000439504; OTTHUMT00000449347; OT…	chr17	-	Multiple_Complex	10	17q25.1
		acyl-CoA oxidase 2, branched chain	TC0300011309.hg.1	ACOX2		6.38325	5.98816	7.30323	7.6393	5.81865	5.50647	0.774053	7.7335	6.42246	6.25877	11.471	11.0377	10.9981	11.2886	5.98695	6.39097	6.83076	6.60914	6.43606	5.88304	6.00863	6.60639	5.33097	6.01865	5.67028	6.01173	5.66893	6.46219	1.1519	0.674767	T	T	-1.73299	0.560123	0.830678	8.25e-12	2.77e-11	T	NM_003500; ENST00000302819; ENST00000459701; ENST00000459888; ENST00000460921; ENST00000466689; ENST00000466810; ENST00000467738; ENST00000474098; ENST00000475143; ENST00000480791; ENST00000481527; ENST00000489472; ENST00000492530; BC047700; OTTHUMT00000353541; OTTHUMT00000353542; OTTHUMT00000353544; OTTHUMT00000353545; OTTHUMT00000353546; OTTHUMT00000353547; OTTHUMT00000353548; OTTHUMT0000035354…	chr3	-	Multiple_Complex	10	3p14.3
		acyl-CoA oxidase 3, pristanoyl	TC0400009978.hg.1	ACOX3		8.32069	7.69749	7.90178	8.0416	8.07699	7.77929	0.973219	7.8431	6.02266	7.42736	9.17467	9.50574	9.43604	9.49861	6.78986	6.4182	6.66679	7.00476	8.50984	8.50359	8.19943	8.04736	8.16708	8.02016	7.90812	8.0336	8.05857	7.94065	0.162627	0.3177	T	T	1.08517	0.9703	0.993795	1.27e-11	4.1e-11	T	NM_001101667; NM_003501; ENST00000356406; ENST00000413009; ENST00000503233; ENST00000508302; ENST00000510365; ENST00000512411; ENST00000514423; ENST00000515797; BC017053; OTTHUMT00000206997; OTTHUMT00000359216; OTTHUMT00000359217; OTTHUMT00000359218; OTTHUMT00000363017; OTTHUMT00000363018; OTTHUMT00000372067; OTTHUMT00000372068	chr4	-	Multiple_Complex	10	4p15.3
		acyl-CoA oxidase-like	TC0200008867.hg.1	ACOXL		4.26009	4.5499	4.72972	4.15279	5.01404	4.48785	0.899722	4.61088	6.5066	4.1731	4.33918	4.30887	4.72429	4.72436	4.76833	4.80622	4.93267	4.90679	4.91959	5.35473	3.84431	4.95505	3.85373	4.798	4.07692	4.10481	4.53127	4.52531	0.434145	0.236952	T	T	1.00414	0.899404	0.972551	0.0023888	0.00273326	T	NM_001142807; ENST00000340561; ENST00000389811; ENST00000417074; ENST00000433706; ENST00000439055; ENST00000441974; ENST00000443586; ENST00000448863; ENST00000461340; ENST00000496981; OTTHUMT00000254024; OTTHUMT00000254025; OTTHUMT00000317477; OTTHUMT00000331946; OTTHUMT00000331947; OTTHUMT00000331948; OTTHUMT00000331949; OTTHUMT00000331953; OTTHUMT00000331954; OTTHUMT00000376017; uc010yxk.1	chr2	+	Multiple_Complex	10	2q13
		acid phosphatase 1, soluble	TC0200006440.hg.1	ACP1		12.851	12.2399	12.763	11.7511	12.3967	12.2953	0.16446	12.2476	12.086	12.8112	11.2625	11.3929	11.4729	11.3799	11.5206	11.3521	11.7293	11.6834	11.2888	11.4207	10.9172	11.3642	10.5241	10.5813	10.6275	10.4335	12.3439	12.8052	0.347196	0.330356	T	T	-1.37672	0.0272132	0.208359	3.36e-09	7.22e-09	T	NM_001040649; NM_004300; NM_007099; NR_024080; ENST00000272065; ENST00000272067; ENST00000405233; ENST00000405364; ENST00000407983; ENST00000413140; ENST00000439645; ENST00000442386; ENST00000453390; ENST00000463831; ENST00000480874; ENST00000484125; ENST00000484464; BC007422; BC106011; OTTHUMT00000195862; OTTHUMT00000195863; OTTHUMT00000195864; OTTHUMT00000322375; OTTHUMT00000322376; OTTHUMT0000…	chr2	+	Multiple_Complex	10	2p25
		acid phosphatase 2, lysosomal	TC1100010730.hg.1	ACP2		9.9186	10.5591	10.0437	9.65725	10.2013	10.6657	0.997957	8.09018	8.43403	10.1835	12.6064	12.8999	12.4403	12.4444	8.97669	8.53536	8.74061	8.68114	7.95321	7.39157	7.93372	7.77329	9.87923	9.32465	8.56322	9.39052	10.1807	10.0129	0.504729	0.339482	T	T	1.12331	0.997318	0.999025	2.06e-13	9.66e-13	T	NM_001302489; NM_001302490; NM_001302491; NM_001302492; NM_001610; ENST00000256997; ENST00000444355; ENST00000524769; ENST00000525230; ENST00000527256; ENST00000529444; ENST00000529663; ENST00000529788; ENST00000530453; ENST00000531004; ENST00000531547; ENST00000533929; ENST00000534448; ENST00000534752; BC003160; BC093010; OTTHUMT00000392022; OTTHUMT00000392023; OTTHUMT00000392024; OTTHUMT0000039…	chr11	-	Multiple_Complex	10	11p11.2|11p12-p11
		acid phosphatase 5, tartrate resistant	TC1900009684.hg.1	ACP5		4.7162	4.50469	5.37973	5.3115	4.07022	4.30338	0.546004	5.47622	5.81265	5.22588	6.84783	7.12571	6.48172	7.33677	4.04295	3.75084	4.56495	4.2513	4.12534	4.59194	4.52208	4.93118	7.68635	7.97192	7.16866	7.78828	4.22748	4.73764	0.659728	0.456564	F	F	-1.42421	0.342692	0.693182	6.9e-11	1.95e-10	F	NM_001111034; NM_001111035; NM_001111036; NM_001611; ENST00000218758; ENST00000412435; ENST00000433365; ENST00000588079; ENST00000588524; ENST00000588625; ENST00000589792; ENST00000590420; ENST00000590832; ENST00000591319; ENST00000592659; ENST00000592828; BC025414; BC111014; OTTHUMT00000458879; OTTHUMT00000458880; OTTHUMT00000458881; OTTHUMT00000458882; OTTHUMT00000458883; OTTHUMT00000458884; OT…	chr19	-	Multiple_Complex	10	19p13.2
		acid phosphatase 6, lysophosphatidic	TC0100015634.hg.1	ACP6		8.22097	8.24443	8.19737	7.1482	8.39056	8.5154	0.666362	7.92369	7.72224	8.06218	6.48394	5.82668	6.05293	5.93226	5.88303	6.16628	6.2518	5.64671	5.61354	6.8177	6.47014	6.30472	7.03968	5.95373	6.81378	6.3097	8.45043	8.22093	0.755897	0.02353	T	T	1.17243	0.547597	0.823926	2.28e-07	3.87e-07	T	NM_016361; ENST00000392988; ENST00000460583; ENST00000487562; ENST00000493129; ENST00000583509; ENST00000609196; ENST00000611629; ENST00000613673; ENST00000614551; ENST00000620634; BC009965; BC034686; OTTHUMT00000039420; OTTHUMT00000039421; OTTHUMT00000100082; OTTHUMT00000100083; OTTHUMT00000473109; OTTHUMT00000477680; OTTHUMT00000477681; OTTHUMT00000477682; OTTHUMT00000477683; OTTHUMT00000477684	chr1	-	Multiple_Complex	10	1q21
		acid phosphatase, prostate	TC0300008839.hg.1	ACPP		5.06448	5.78158	5.25438	5.21127	5.32717	5.67199	0.892737	4.99761	5.34227	5.3345	4.52718	4.79679	4.31972	4.61885	5.47534	5.15806	5.27254	4.77693	4.7561	4.79646	4.47346	4.44682	4.54579	4.82996	5.07985	4.67545	5.34304	5.28658	0.239651	0.371536	T	T	1.03991	0.868598	0.965672	0.00159608	0.00185052	T	NM_001099; NM_001134194; NM_001292037; ENST00000336375; ENST00000351273; ENST00000475741; ENST00000483689; ENST00000489084; ENST00000493235; ENST00000495911; ENST00000507647; ENST00000512463; BC007460; BC008493; BC016344; OTTHUMT00000356699; OTTHUMT00000356700; OTTHUMT00000356701; OTTHUMT00000356752; OTTHUMT00000356753; OTTHUMT00000356784; OTTHUMT00000356785; OTTHUMT00000358311; OTTHUMT00000358312	chr3	+	Multiple_Complex	10	3q22.1
		acid phosphatase, testicular	TC1900008603.hg.1	ACPT		5.1756	5.94476	6.06891	5.94798	5.90697	6.23836	0.369425	6.95382	5.84249	7.28553	5.90182	6.45942	6.46087	6.03594	5.60203	5.52527	5.74917	6.51032	6.1094	6.39838	5.7637	5.78422	5.96248	5.79283	6.52115	5.25866	5.92831	6.0043	0.180657	0.483912	T	T	-1.05409	0.329815	0.684326	0.0258063	0.0274442	T	NM_033068; ENST00000270593; OTTHUMT00000464434; uc002pta.1	chr19	+	Coding	10	19q13.4
		acrosin	TC2200007826.hg.1	ACR		3.77961	3.55225	3.8916	3.72	3.72773	3.44475	0.464217	6.11006	2.94967	4.12687	4.61874	3.90576	3.84689	4.20926	10.0024	9.95612	9.92702	9.59417	3.19129	3.67638	3.38303	3.63181	3.11049	3.76075	3.69888	4.06899	3.72371	3.75847	0.161193	0.172913	F	F	-1.02438	0.639383	0.875255	6.25e-19	1.65e-17	F	NM_001097; ENST00000216139; ENST00000527761; ENST00000529621; ENST00000533930; OTTHUMT00000316605; OTTHUMT00000388560; OTTHUMT00000388561; OTTHUMT00000388562	chr22	+	Multiple_Complex	10	22q13.33
		acrosin binding protein	TC1200009746.hg.1	ACRBP		4.12086	3.99148	3.77052	3.9724	3.85806	3.45623	0.347765	5.49306	4.3292	3.87365	3.67845	3.96235	3.64807	3.64163	12.4176	12.1701	12.5493	12.5736	3.22966	4.13797	3.29346	3.85577	3.96526	4.08963	4.11328	3.91663	3.85918	3.9718	0.2711	0.177154	F	F	-1.08119	0.36907	0.713446	1.19e-22	1.67e-20	F	NM_032489; ENST00000229243; ENST00000414226; ENST00000535884; ENST00000536350; ENST00000538524; ENST00000540513; ENST00000542357; ENST00000544352; ENST00000546114; BC033010; OTTHUMT00000400702; OTTHUMT00000400703; OTTHUMT00000400705; OTTHUMT00000400706; OTTHUMT00000400707; OTTHUMT00000400708; OTTHUMT00000400709; OTTHUMT00000400710; OTTHUMT00000400711	chr12	-	Multiple_Complex	10	12p13.31
		acidic repeat containing	TC0X00007574.hg.1	ACRC		6.02563	5.57462	4.85691	5.57747	5.44159	5.96839	0.662057	4.15652	5.82698	5.14095	4.3351	5.35537	5.53391	5.27838	8.06171	7.92569	8.6278	8.5972	7.29383	7.02411	6.499	6.37529	5.49053	5.6011	5.36093	5.3003	5.59847	5.51452	0.273496	0.58941	T	T	1.05991	0.579427	0.842831	6.58e-10	1.58e-09	T	NM_052957; ENST00000373695; ENST00000373696; ENST00000471950; BC136259; OTTHUMT00000081855; OTTHUMT00000081856; OTTHUMT00000081857	chrX	+	Multiple_Complex	10	Xq13.1
		acrosomal vesicle protein 1	TC1100012712.hg.1	ACRV1		4.39666	3.82253	4.43099	3.65169	4.00128	3.51689	0.113736	6.90387	4.29752	4.56277	3.52507	3.66827	4.24539	4.16091	11.4294	10.8676	11.2309	11.3406	4.01524	3.84827	4.79923	3.87646	3.6728	3.64509	4.09737	3.73808	3.67718	4.41313	0.250006	0.341816	F	F	-1.66549	0.0694276	0.334475	2.16e-19	6.79e-18	F	NM_001612; NM_020069; NM_020107; NM_020108; ENST00000315608; ENST00000527795; ENST00000530048; ENST00000533904; BC014588; OTTHUMT00000386722; OTTHUMT00000386723; OTTHUMT00000386724; OTTHUMT00000386725	chr11	-	Coding	10	11q24.2
		acyl-CoA synthetase bubblegum family member 1	TC1500010136.hg.1	ACSBG1		3.05005	3.17977	2.99347	4.30911	3.2139	3.51586	0.141688	4.12128	4.81812	3.21266	2.67664	2.98111	3.226	2.66688	4.30086	4.04523	4.33025	4.04488	3.06487	3.61864	3.28863	3.05089	2.52789	2.97982	2.58286	2.59239	3.57208	3.06136	0.565672	0.0955129	F	F	1.42476	0.0177139	0.167568	8.19e-07	1.31e-06	F	NM_001199377; NM_015162; ENST00000258873; ENST00000557935; ENST00000558130; ENST00000558301; ENST00000558728; ENST00000558793; ENST00000558828; ENST00000559114; ENST00000559241; ENST00000559707; ENST00000559713; ENST00000560124; ENST00000560183; ENST00000560817; BC009289; OTTHUMT00000289802; OTTHUMT00000419248; OTTHUMT00000419249; OTTHUMT00000419286; OTTHUMT00000419287; OTTHUMT00000419288; OTTHUM…	chr15	-	Multiple_Complex	10	15q23-q24
		acyl-CoA synthetase bubblegum family member 2	TC1900006789.hg.1	ACSBG2		3.68527	2.96134	2.58492	2.88509	3.09641	2.90546	0.745215	4.33701	5.28274	3.52344	2.38519	3.06203	2.80247	2.76422	10.5872	10.7804	10.509	10.8024	3.56482	2.61609	2.80037	2.70866	3.34175	2.75986	3.11325	3.01093	2.89569	3.02882	0.116571	0.559246	F	F	-1.09668	0.663483	0.887569	8.01e-20	3.05e-18	F	NM_001289177; NM_001289178; NM_001289179; NM_001289180; NM_030924; ENST00000585526; ENST00000586696; ENST00000587227; ENST00000587617; ENST00000588304; ENST00000588485; ENST00000588722; ENST00000589401; ENST00000590132; ENST00000591403; ENST00000591738; ENST00000591741; ENST00000592677; BC022027; BC090046; OTTHUMT00000452893; OTTHUMT00000452894; OTTHUMT00000452895; OTTHUMT00000452896; OTTHUMT0000…	chr19	+	Multiple_Complex	10	19p13.3
		acyl-CoA synthetase family member 2	TC1700008254.hg.1	ACSF2		12.1473	13.1314	11.849	12.0944	13.1168	13.1739	0.467499	6.65331	8.45904	9.4003	7.61994	7.50246	8.01985	7.96352	6.47323	6.65731	6.91335	6.38422	5.98491	5.88454	6.26484	5.99795	6.28857	6.17918	6.64449	6.52943	13.1442	12.1647	0.607435	0.671057	T	T	1.97178	0.160823	0.502673	6.69e-18	1.17e-16	T	NM_001288968; NM_001288969; NM_001288970; NM_001288971; NM_001288972; NM_025149; NR_110232; ENST00000300441; ENST00000427954; ENST00000502667; ENST00000503295; ENST00000503387; ENST00000503408; ENST00000504392; ENST00000504945; ENST00000506052; ENST00000506085; ENST00000506582; ENST00000507769; ENST00000507792; ENST00000508245; ENST00000508734; ENST00000509806; ENST00000510262; ENST00000510410; E…	chr17	+	Multiple_Complex	10	17q21.33
		acyl-CoA synthetase family member 3	TC1600008865.hg.1	ACSF3		8.66841	8.05041	8.46649	8.10022	8.01158	8.42513	0.383748	8.27358	8.04573	7.84261	8.66431	8.31834	8.42216	8.10857	7.66256	7.73351	7.47418	7.64417	7.38573	7.96188	7.33046	8.10035	8.57482	8.57933	8.08647	8.62148	8.09455	8.42793	0.217733	0.315124	T	T	-1.25996	0.351488	0.699143	0.00238155	0.00272525	T	NM_001127214; NM_001243279; NM_001284316; NM_174917; NR_045667; NR_104293; ENST00000317447; ENST00000378345; ENST00000393145; ENST00000406948; ENST00000535176; ENST00000537116; ENST00000537155; ENST00000537290; ENST00000537895; ENST00000538340; ENST00000540697; ENST00000541755; ENST00000542688; ENST00000543676; ENST00000544543; ENST00000562204; ENST00000562750; ENST00000614302; BC028399; BC072391…	chr16	+	Multiple_Complex	10	16q24.3
		acyl-CoA synthetase long-chain family member 1	TC0400012621.hg.1	ACSL1		11.1592	9.56945	11.1678	8.49949	8.90284	9.4735	0.0497753	5.53214	6.68452	5.85086	16.402	16.2692	16.1914	16.438	9.74448	9.88812	9.8607	9.75145	13.142	13.2774	13.2564	13.227	10.9201	10.8058	11.0051	11.076	8.94302	11.1633	0.489394	0.920332	T	T	-4.6599	8.88e-06	0.0028023	2.19e-19	6.89e-18	T	NM_001286708; NM_001286710; NM_001286711; NM_001286712; NM_001995; ENST00000281455; ENST00000454703; ENST00000503407; ENST00000504342; ENST00000504900; ENST00000505492; ENST00000506733; ENST00000507295; ENST00000513001; ENST00000513317; ENST00000515030; ENST00000622937; BC050073; OTTHUMT00000361098; OTTHUMT00000361099; OTTHUMT00000361100; OTTHUMT00000361101; OTTHUMT00000361102; OTTHUMT00000361103…	chr4	-	Multiple_Complex	10	4q35.1
		acyl-CoA synthetase long-chain family member 3	TC0200010907.hg.1	ACSL3		9.72698	10.0582	10.2237	9.86699	10.2768	10.4965	0.421565	11.604	9.43686	10.7862	11.5477	11.8229	11.5926	11.917	11.4238	11.0438	10.9198	10.6363	10.1223	9.57054	10.1451	10.2015	9.80618	9.51828	9.37402	9.69236	10.2388	10.0273	0.319501	0.252923	T	T	1.15786	0.359896	0.706464	3.11e-09	6.73e-09	T	NM_004457; NM_203372; ENST00000357430; ENST00000392066; ENST00000407441; ENST00000413316; ENST00000421680; ENST00000463813; ENST00000474422; ENST00000495541; ENST00000535678; ENST00000540115; ENST00000542810; BC041692; OTTHUMT00000256862; OTTHUMT00000331001; OTTHUMT00000331002; OTTHUMT00000331003; OTTHUMT00000331004; OTTHUMT00000331006; OTTHUMT00000331007; OTTHUMT00000331008; OTTHUMT00000396904; …	chr2	+	Multiple_Complex	10	2q34-q35
		acyl-CoA synthetase long-chain family member 4	TC0X00011382.hg.1	ACSL4		8.64019	9.03704	8.97455	9.39342	9.72978	9.78568	0.0123449	7.4505	6.02975	6.74884	11.3705	11.5471	11.7082	11.4858	8.76978	8.88787	8.87192	8.78622	11.3556	11.4966	11.5972	11.6498	9.18641	9.33579	9.52194	9.36984	9.75659	9.00452	0.212183	0.213382	T	T	1.68421	0.000174432	0.0153585	2.52e-18	5.21e-17	T	NM_004458; NM_022977; ENST00000340800; ENST00000348502; ENST00000469796; ENST00000469857; ENST00000502391; ENST00000504383; ENST00000504980; ENST00000505855; ENST00000508092; ENST00000514500; BC034959; OTTHUMT00000057893; OTTHUMT00000057894; OTTHUMT00000358155; OTTHUMT00000359651; OTTHUMT00000359652; OTTHUMT00000359653; OTTHUMT00000359654; OTTHUMT00000359655; OTTHUMT00000359656	chrX	-	Multiple_Complex	10	Xq22.3-q23
		acyl-CoA synthetase long-chain family member 5	TC1000008926.hg.1	ACSL5		5.39825	5.38416	5.38828	5.68539	6.25053	5.64863	0.0728552	6.82965	7.11984	7.85672	13.8334	13.3615	13.5344	13.7268	8.22357	8.57915	8.87634	8.70272	7.16011	6.72793	7.23167	7.51536	9.62669	9.69859	9.95839	9.88654	5.66776	5.38911	0.337396	0.00724463	T	T	1.21306	0.0397272	0.251981	5.12e-21	3.17e-19	T	NM_016234; NM_203379; NM_203380; ENST00000354273; ENST00000354655; ENST00000356116; ENST00000393081; ENST00000433418; ENST00000467340; ENST00000479936; ENST00000495539; ENST00000496328; BC007985; OTTHUMT00000050386; OTTHUMT00000050387; OTTHUMT00000050388; OTTHUMT00000050389; OTTHUMT00000050390; OTTHUMT00000050391	chr10	+	Multiple_Complex	10	10q25.2
		acyl-CoA synthetase long-chain family member 6	TC0500013353.hg.1	ACSL6		8.43566	5.85621	7.3308	5.29769	5.44125	5.43071	0.0721279	4.35333	5.57098	4.48977	5.36341	5.38171	4.32316	4.625	7.37532	7.75851	7.57131	7.6812	4.57846	4.70933	3.22615	5.4803	4.11503	4.6306	4.21951	4.1929	5.43577	7.23968	0.0800155	1.29413	T	T	-3.49165	0.000977047	0.0376912	3.43e-07	5.71e-07	T	NM_001009185; NM_001205247; NM_001205248; NM_001205250; NM_001205251; NM_015256; ENST00000296869; ENST00000357096; ENST00000379240; ENST00000379244; ENST00000379246; ENST00000379255; ENST00000379264; ENST00000414078; ENST00000416557; ENST00000419502; ENST00000430403; ENST00000431707; ENST00000434099; ENST00000441995; ENST00000469164; ENST00000477640; ENST00000484870; ENST00000489047; ENST00000492…	chr5	-	Multiple_Complex	10	5q31.1
		acyl-CoA synthetase medium-chain family member 1	TC1600009664.hg.1	ACSM1		3.94346	4.01168	3.69821	4.34988	3.84209	3.18773	0.807027	3.53517	4.16567	2.83042	3.74267	3.65071	3.30336	2.7034	4.00487	4.66537	4.17199	4.07852	3.79198	2.99094	3.01531	3.21164	4.12136	3.8203	3.95536	3.95688	3.80545	3.94605	0.582614	0.164856	F	F	-1.10236	0.75146	0.922394	0.00495208	0.00552871	F	NM_052956; ENST00000307493; ENST00000519031; ENST00000519745; ENST00000520010; ENST00000523065; ENST00000524149; BC125178; OTTHUMT00000254412; OTTHUMT00000378372; OTTHUMT00000378373; OTTHUMT00000378374; OTTHUMT00000378375; OTTHUMT00000378376; uc002dhm.1	chr16	-	Multiple_Complex	10	16p12.3
		acyl-CoA synthetase medium-chain family member 2A	TC1600007131.hg.1	ACSM2A		7.49073	7.69752	8.00162	8.04784	7.67521	7.58445	0.857781	7.82466	7.22792	7.64021	12.4109	12.2191	12.5552	12.3117	7.23209	7.22143	7.56446	7.07209	8.42556	8.01418	8.1041	8.01063	7.23679	7.50584	7.85394	7.35486	7.6535	7.72045	0.245568	0.256985	T	T	-1.0475	0.847202	0.9582	8.53e-18	1.44e-16	T	NM_001308169; NM_001308172; NM_001308954; ENST00000219054; ENST00000396104; ENST00000417235; ENST00000570698; ENST00000571204; ENST00000571894; ENST00000572843; ENST00000572921; ENST00000573854; ENST00000574251; ENST00000574692; ENST00000575558; ENST00000575690; ENST00000576101; ENST00000576119; ENST00000576361; BC125176; OTTHUMT00000436758; OTTHUMT00000436759; OTTHUMT00000436760; OTTHUMT00000436…	chr16	+	Multiple_Complex	10	16p12.3
		acyl-CoA synthetase medium-chain family member 2B	TC1600009659.hg.1	ACSM2B		6.00456	5.17252	5.63221	5.80149	5.36232	4.90622	0.523731	6.20618	6.20174	5.92837	13.7493	14.4271	13.895	14.3703	4.92053	4.97811	4.73749	5.27593	6.12506	6.5261	5.6703	6.39185	4.96046	5.18682	5.50134	4.85803	5.35779	5.61003	0.447662	0.416783	T	T	-1.19105	0.376391	0.718566	1.54e-20	7.66e-19	T	NM_001105069; NM_182617; ENST00000329697; ENST00000414188; ENST00000562026; ENST00000563943; ENST00000564849; ENST00000564855; ENST00000565232; ENST00000565322; ENST00000566384; ENST00000566998; ENST00000567001; ENST00000567288; ENST00000568098; ENST00000568882; ENST00000569131; ENST00000569163; ENST00000569327; ENST00000569344; ENST00000569364; OTTHUMT00000254417; OTTHUMT00000435898; OTTHUMT0000…	chr16	-	Multiple_Complex	10	16p12.3
		acyl-CoA synthetase medium-chain family member 3	TC1600011361.hg.1	ACSM3		3.11691	3.55968	3.48731	3.81059	4.12672	3.01552	0.503198	5.36661	5.14344	6.59631	3.80749	4.82495	3.4779	3.86178	6.11731	5.63906	5.54462	5.36882	3.82986	3.26527	3.1869	3.1876	3.70716	3.25407	3.13221	3.3949	3.74916	3.52202	0.572544	0.237514	T	F	1.17051	0.399711	0.734929	6.28e-09	1.3e-08	F	ENST00000614721; OTTHUMT00000473797	chr16	+	NonCoding	10	16p13.11
		acyl-CoA synthetase medium-chain family member 3	TC1600011362.hg.1	ACSM3		5.96228	6.99778	6.26532	5.9794	5.83885	6.45988	0.430332	6.03054	6.47927	6.28218	8.87157	9.85673	9.14449	9.31958	7.87399	8.09314	7.19101	8.15012	7.03798	6.33311	5.16798	6.57048	5.86304	6.2387	5.70889	5.88642	5.98248	6.32546	0.325651	0.532383	T	T	-1.26837	0.398908	0.734212	6.88e-09	1.41e-08	T	NM_005622; NM_202000; ENST00000289416; ENST00000440284; ENST00000561499; ENST00000561795; ENST00000562251; ENST00000563914; ENST00000564701; ENST00000567006; ENST00000567387; ENST00000567711; ENST00000569141; BC002790; OTTHUMT00000254414; OTTHUMT00000435923; OTTHUMT00000435924; OTTHUMT00000435925; OTTHUMT00000435926; OTTHUMT00000435927; OTTHUMT00000435928; OTTHUMT00000435929; OTTHUMT00000435930; …	chr16	+	Multiple_Complex	10	16p13.11
		acyl-CoA synthetase medium-chain family member 4	TC1200006676.hg.1	ACSM4		3.94908	4.50512	4.21462	3.91095	4.54444	4.27578	0.936184	5.99076	5.93383	5.63872	3.56203	3.89498	3.87985	3.77492	3.73109	3.8218	3.80002	3.74838	4.06941	4.01485	3.98134	4.0083	3.46925	4.16988	4.12667	3.85498	4.25225	4.22121	0.317959	0.278113	T	T	1.02175	0.917832	0.97924	9.24e-09	1.87e-08	T	NM_001080454; ENST00000399422; ENST00000533292; OTTHUMT00000337866; OTTHUMT00000382325	chr12	+	Multiple_Complex	10	12p13.31
		acyl-CoA synthetase medium-chain family member 5	TC1600007130.hg.1	ACSM5		3.82544	3.48445	4.262	4.02307	4.22634	3.46767	0.886913	5.17503	4.79201	5.47602	9.00687	8.87827	9.12736	9.41745	3.57733	3.48628	3.76785	3.84403	4.49366	4.00082	5.24422	4.13005	3.67178	4.22235	3.92707	4.04551	3.98747	3.84939	0.392719	0.389753	F	F	1.10044	0.861863	0.963576	1.74e-15	1.38e-14	F	NM_017888; ENST00000331849; ENST00000570305; ENST00000573920; ENST00000574748; ENST00000575070; ENST00000575584; ENST00000577024; BC068516; OTTHUMT00000254413; OTTHUMT00000436752; OTTHUMT00000436753; OTTHUMT00000436754; OTTHUMT00000436755; OTTHUMT00000436756; OTTHUMT00000436757; uc002dhd.1	chr16	+	Multiple_Complex	10	16p12.3
		acyl-CoA synthetase medium-chain family member 6	TC1000008516.hg.1	ACSM6		4.10184	4.04711	3.38044	4.23789	3.91487	4.39819	0.278779	6.05112	5.10636	5.61707	5.27772	4.58816	4.59012	4.41337	2.98473	3.08916	2.93059	3.60748	4.16158	3.94636	4.0003	4.0628	3.80026	3.17703	3.45415	3.3305	4.20781	4.07336	0.246183	0.401635	F	F	1.09768	0.176135	0.526735	1.85e-08	3.6e-08	F	NM_207321; ENST00000327739; ENST00000341686; ENST00000394005; ENST00000404473; OTTHUMT00000049506; OTTHUMT00000346852; OTTHUMT00000346853	chr10	+	Coding	10	10q23.33
		acyl-CoA synthetase short-chain family member 1	TC2000008722.hg.1	ACSS1		9.18646	9.16238	8.26158	9.25667	8.77844	8.2157	0.793284	10.0051	9.03676	9.42577	9.37951	9.97047	9.25228	9.39568	10.3693	10.4001	10.3637	10.2927	9.52866	9.75058	9.72323	10.1513	9.88055	10.1709	10.2373	10.1242	8.75662	9.17393	0.521056	0.527166	T	T	-1.33543	0.649836	0.880591	1.21e-05	1.7e-05	T	NM_001252675; NM_001252676; NM_001252677; NM_032501; ENST00000323482; ENST00000376726; ENST00000432802; ENST00000484396; ENST00000537502; BC039261; BC044588; BC055008; OTTHUMT00000078386; OTTHUMT00000078387; OTTHUMT00000078388; uc021wbl.1	chr20	-	Multiple_Complex	10	20p11.21
		acyl-CoA synthetase short-chain family member 2	TC2000007202.hg.1	ACSS2		8.73353	8.65273	8.30831	8.87102	9.76867	8.81639	0.154638	5.45023	6.55364	7.80094	13.2157	12.9832	12.9254	12.8677	7.76547	7.91123	7.40366	7.85651	9.62217	10.0321	10.2034	10.3489	7.69416	7.80059	7.91173	7.37212	8.84482	8.67712	0.534727	0.22582	T	T	1.12327	0.0231054	0.190895	1.88e-17	2.81e-16	T	NM_001076552; NM_001242393; NM_018677; ENST00000253382; ENST00000360596; ENST00000461051; ENST00000464399; ENST00000467019; ENST00000468550; ENST00000470315; ENST00000473172; ENST00000475459; ENST00000476922; ENST00000477932; ENST00000480274; ENST00000480978; ENST00000481284; ENST00000481971; ENST00000484354; ENST00000488172; ENST00000490046; ENST00000490464; ENST00000491533; ENST00000493250; ENS…	chr20	+	Multiple_Complex	10	20q11.22
		Memczak2013 ANTISENSE, CDS, coding, INTERNAL best transcript NM_001076552	TC2000008950.hg.1	ACSS2		3.16599	3.29228	3.03427	2.73604	3.22315	3.14743	0.488166	3.89486	5.38043	5.70982	3.13015	3.4437	4.70351	3.61005	2.20868	2.34404	2.65193	2.10725	2.83748	3.22245	3.07933	3.57508	2.82316	3.08748	2.94098	2.87299	3.18375	3.16454	0.262123	0.129015	F	F	1.0134	0.651865	0.88177	9.6e-08	1.71e-07	F	hsa_circ_0001144	chr20	-	NonCoding	6
		acyl-CoA synthetase short-chain family member 3	TC1200012680.hg.1	ACSS3		10.2594	10.5199	10.0817	9.66313	9.61763	8.98239	0.0270114	6.46399	6.08051	7.74184	13.2953	13.4178	13.3902	13.2487	7.81047	7.83121	8.12635	7.92784	8.44647	8.02442	8.7835	8.87469	7.84718	7.47821	8.24692	7.7551	9.63945	10.279	0.380571	0.220391	T	T	-1.55781	0.00112286	0.0403427	4.78e-18	8.88e-17	T	NM_024560; ENST00000261206; ENST00000546664; ENST00000548058; ENST00000548324; ENST00000548387; ENST00000551745; BC009317; BC015769; OTTHUMT00000407794; OTTHUMT00000407795; OTTHUMT00000407796; OTTHUMT00000407797; OTTHUMT00000407798; OTTHUMT00000407799	chr12	+	Multiple_Complex	10	12q21.31
		acyl-CoA synthetase short-chain family member 3	TC1200012679.hg.1	ACSS3		3.37114	3.90899	2.53092	3.58619	3.66772	3.30868	0.579041	4.01562	4.99037	4.05198	3.55204	4.46851	4.39846	3.59346	3.67736	3.77981	3.74122	4.02739	4.20799	3.33523	3.52237	3.66836	3.5094	3.0816	3.69985	3.63948	3.58401	3.30224	0.188224	0.694542	F	F	1.21568	0.418226	0.748003	0.0256686	0.0273045	F	ENST00000616449; OTTHUMT00000474703	chr12	+	NonCoding	10	12q21.31
		actin, alpha 1, skeletal muscle	TC0100017663.hg.1	ACTA1		7.942	8.66332	7.56037	8.79169	8.62613	8.52574	0.14933	7.11986	7.22943	7.30781	9.11086	9.31115	8.97809	8.94125	10.4573	9.89622	10.1872	10.1816	19.5251	19.4001	19.616	19.5495	9.37152	9.05085	9.05508	9.3325	8.64048	8.00909	0.134299	0.560125	T	T	1.54906	0.0126646	0.142149	6.45e-25	3.22e-22	T	NM_001100; ENST00000366683; ENST00000366684; BC012597; OTTHUMT00000092781	chr1	-	Coding	10	1q42.13
		actin, alpha 2, smooth muscle, aorta	TC1000011370.hg.1	ACTA2		12.0391	12.3432	10.8925	12.8649	11.663	12.2442	0.424449	12.9338	13.4375	12.7149	12.2703	12.3226	12.2862	12.2282	14.5163	14.6286	14.8677	14.4818	12.4533	12.5762	12.4747	12.2965	15.308	15.0699	15.1508	15.0839	12.2547	12.0709	0.601048	0.765064	T	T	1.13588	0.0895162	0.38079	1.74e-11	5.46e-11	T	NM_001141945; NM_001613; ENST00000224784; ENST00000415557; ENST00000458159; ENST00000458208; ENST00000480297; ENST00000482085; ENST00000488967; BC017554; BC093052; OTTHUMT00000049264; OTTHUMT00000049265; OTTHUMT00000049266; OTTHUMT00000049267; OTTHUMT00000049268; OTTHUMT00000049269	chr10	-	Multiple_Complex	10	10q23.3
		actin, beta	TC0700010167.hg.1	ACTB		10.4353	10.7816	10.0398	10.4615	10.8646	10.9724	0.259836	6.93306	7.09269	7.49951	11.8921	12.1596	11.413	11.512	11.1064	10.8081	10.8357	10.5665	10.16	10.6886	10.7687	10.9629	13.31	12.9572	12.8592	13.1297	10.8744	10.4225	0.269285	0.371188	T	T	1.36783	0.166845	0.512678	3.5e-15	2.52e-14	T	NM_001101; ENST00000331789; ENST00000414620; ENST00000417101; ENST00000425660; ENST00000432588; ENST00000443528; ENST00000462494; ENST00000464611; ENST00000473257; ENST00000477812; ENST00000480301; ENST00000484841; ENST00000493945; BC001301; BC002409; BC004251; BC013380; BC014861; BC016045; OTTHUMT00000059589; OTTHUMT00000324020; OTTHUMT00000324021; OTTHUMT00000324022; OTTHUMT00000324023; OTTHUMT…	chr7	-	Multiple_Complex	10	7p22
		actin, beta-like 2	TC0500010822.hg.1	ACTBL2		3.51428	4.04948	3.37349	3.67775	3.53063	3.40058	0.646358	4.8446	5.06722	4.32524	3.16643	3.85743	3.54318	3.56001	3.04842	3.56889	3.2411	3.24296	4.20227	3.84801	4.07344	3.60507	3.48996	3.5548	3.61462	3.30342	3.53509	3.49791	0.138673	0.356656	F	F	1.02611	0.611964	0.861211	1.9e-05	2.63e-05	F	NM_001017992; ENST00000423391; BC137470; BC137473; OTTHUMT00000368579; uc003jrm.3	chr5	-	Multiple_Complex	10	5q11.2
		actin, alpha, cardiac muscle 1	TC1500009002.hg.1	ACTC1		6.18285	6.22638	6.34209	6.78463	7.04595	6.07911	0.257472	6.76255	6.95287	5.40993	7.13897	7.36975	6.27429	6.49007	8.84589	8.98506	8.5736	8.1509	15.5267	15.4516	15.4908	15.6052	6.33308	7.18884	6.91597	6.75756	6.73788	6.23437	0.500138	0.0823015	T	T	1.41766	0.188201	0.540218	2.62e-20	1.2e-18	T	NM_005159; ENST00000290378; ENST00000557860; ENST00000560563; BC009978; OTTHUMT00000251876; OTTHUMT00000417524; OTTHUMT00000417525	chr15	-	Multiple_Complex	10	15q14
		actin gamma 1	TC1700012052.hg.1	ACTG1		16.7697	17.6368	17.1253	17.0293	17.3577	17.7891	0.55548	17.0029	16.695	17.3829	17.2302	17.2259	17.2715	17.2448	17.2866	17.14	17.2082	17.2213	14.642	15.4982	15.5429	15.4751	17.6319	17.6221	17.6026	17.4729	17.3833	17.1625	0.381034	0.435843	T	T	1.1654	0.36947	0.713822	8.61e-09	1.75e-08	T	NM_001199954; NM_001614; NR_037688; ENST00000331925; ENST00000570382; ENST00000571691; ENST00000571721; ENST00000572105; ENST00000573283; ENST00000574671; ENST00000575087; ENST00000575659; ENST00000575842; ENST00000575994; ENST00000576209; ENST00000576214; ENST00000576544; ENST00000576917; ENST00000615544; BC000292; BC001920; BC007442; BC009848; BC010999; BC012050; BC015005; BC015695; BC015779; B…	chr17	-	Multiple_Complex	10	17q25
		actin, gamma 2, smooth muscle, enteric	TC0200008062.hg.1	ACTG2		7.42356	6.65761	6.81807	7.50974	6.92141	6.70831	0.822526	9.35525	8.81785	9.09948	7.44824	7.4474	7.46936	6.76648	9.44621	9.57622	9.74327	9.92649	8.60033	8.74933	7.9928	8.25988	7.84962	7.72487	8.37539	7.60952	6.95797	6.80116	0.415097	0.403948	T	T	1.11482	0.768999	0.92804	1.04e-09	2.41e-09	T	NM_001199893; NM_001615; ENST00000345517; ENST00000409624; ENST00000409731; ENST00000409918; ENST00000429756; ENST00000438902; ENST00000442912; ENST00000468543; ENST00000473016; BC012617; OTTHUMT00000252044; OTTHUMT00000328085; OTTHUMT00000328086; OTTHUMT00000328087; OTTHUMT00000328089; OTTHUMT00000328090; OTTHUMT00000328091; OTTHUMT00000328092; OTTHUMT00000328093	chr2	+	Multiple_Complex	10	2p13.1
		actin-like 10	TC2000007162.hg.1	ACTL10		3.18731	3.45786	3.8351	3.7116	3.46277	3.64348	0.607154	5.04344	3.98911	2.95616	4.30496	3.85923	4.74008	3.5388	4.89471	5.06165	4.79205	4.59676	3.51446	3.92475	3.66271	3.97665	3.65696	3.11047	3.615	4.00208	3.63095	3.48366	0.12859	0.325356	F	F	1.10749	0.672593	0.891207	2.97e-05	4.03e-05	F	NM_001024675; ENST00000330271; BC137111; BC137114; OTTHUMT00000078713; uc002wzt.3	chr20	+	Coding	10	20q11.22
		actin-like 6A	TC0300009609.hg.1	ACTL6A		7.92288	8.30965	8.10943	7.59909	8.56328	7.9925	0.846164	7.46463	7.54817	7.29616	8.20816	8.11754	8.23052	8.43369	9.84341	10.0055	10.0454	9.69724	7.58028	6.76794	7.78085	8.09563	7.74395	7.98344	7.72123	8.03585	8.03458	8.11306	0.484806	0.193425	T	T	-1.05591	0.814014	0.946232	3.15e-08	5.96e-08	T	NM_004301; NM_177989; NM_178042; ENST00000392662; ENST00000429709; ENST00000450518; ENST00000461125; ENST00000467383; ENST00000467615; ENST00000468767; ENST00000479056; ENST00000484312; ENST00000486471; ENST00000487978; ENST00000490364; ENST00000491202; ENST00000494843; BC000949; BC001391; BC036371; OTTHUMT00000349599; OTTHUMT00000349600; OTTHUMT00000349604; OTTHUMT00000349605; OTTHUMT00000349606…	chr3	+	Multiple_Complex	10	3q26.33
		actin-like 6B	TC0700012011.hg.1	ACTL6B		3.62569	4.66463	3.98944	5.33749	3.91416	4.01288	0.583184	7.49766	6.31279	5.28351	3.89632	4.06135	3.93777	4.40876	3.79334	3.6157	3.75663	3.70961	4.32943	5.44592	5.21092	4.72468	3.94552	3.61222	3.85009	3.90498	3.96553	4.05199	0.794796	0.527192	F	F	-1.06176	0.313809	0.670383	1.78e-07	3.06e-07	F	NM_016188; ENST00000160382; ENST00000461605; ENST00000485601; ENST00000487125; ENST00000487225; ENST00000489904; BC020944; OTTHUMT00000356745; OTTHUMT00000356746; OTTHUMT00000356747; OTTHUMT00000356748; OTTHUMT00000356749; OTTHUMT00000356750	chr7	-	Multiple_Complex	10	7q22
		actin-like 7A	TC0900008379.hg.1	ACTL7A		4.99672	5.15769	5.29593	4.86933	4.95005	4.55594	0.0727465	5.85659	7.83557	6.26878	5.40145	5.16616	5.00847	4.84396	12.3611	12.0884	12.2904	12.3652	5.63992	5.32789	5.42363	5.43788	5.03634	4.86802	5.06692	5.05311	4.88131	5.1518	0.208187	0.149749	T	T	-1.20622	0.0506969	0.285768	4.91e-23	8.71e-21	T	NM_006687; ENST00000333999; BC014610; OTTHUMT00000053570	chr9	+	Coding	10	9q31
		actin-like 7B	TC0900011145.hg.1	ACTL7B		5.07074	5.4843	5.30565	5.67529	5.21381	5.04521	0.917738	6.08905	7.7723	6.70106	4.99931	4.56201	5.10443	4.86898	10.6214	10.5462	10.5743	10.3372	5.69814	5.32298	5.30011	4.98771	5.42898	5.05066	5.30888	4.97165	5.24324	5.2917	0.326188	0.207417	T	T	-1.03416	0.908243	0.975489	1.93e-18	4.16e-17	T	NM_006686; ENST00000374667; BC033789; OTTHUMT00000053571	chr9	-	Coding	10	9q31
		actin-like 8	TC0100007127.hg.1	ACTL8		4.59187	4.26921	4.89103	4.98547	4.31836	4.22413	0.81524	5.5858	4.87143	5.23374	4.16556	4.05209	4.23927	4.15835	3.91821	4.22363	4.33086	4.51964	4.41422	4.3052	4.32759	4.54415	3.52299	3.70994	4.04074	4.27513	4.27317	4.58564	0.415041	0.310984	T	T	-1.24184	0.743247	0.919582	0.000262769	0.000326623	T	NM_030812; ENST00000375406; ENST00000617065; BC028909; OTTHUMT00000007143; uc001bat.3	chr1	+	Multiple_Complex	10	1p36.13
		actin-like 9	TC1900009555.hg.1	ACTL9		4.48559	4.66307	3.86725	3.74534	3.8385	4.28066	0.25943	6.4862	5.46228	4.59612	4.41758	4.56459	4.11764	4.44348	6.16199	5.31405	5.65956	4.96472	4.07009	5.54668	4.13704	5.23857	4.55694	4.00007	4.82782	4.14736	3.79631	4.48552	0.285993	0.417767	F	F	-1.6124	0.286104	0.645458	0.000257558	0.000320406	F	NM_178525; ENST00000324436; ENST00000612068; BC024028; BC045752; OTTHUMT00000459953	chr19	-	Coding	10	19p13.2
		actinin, alpha 1; high mobility group nucleosome binding domain 1 pseudogene 3	TC1400009529.hg.1	ACTN1; HMGN1P3		12.2974	11.5782	12.7787	11.8214	11.5204	11.8336	0.246619	7.46978	7.54601	6.581	13.4595	13.5448	13.4855	12.9859	12.272	12.0938	12.1631	12.1125	12.2929	12.2001	12.7437	12.4932	12.3527	12.3604	12.333	12.4231	11.8272	12.2418	0.177386	0.604196	T	T	-1.3329	0.0432185	0.263338	1.33e-16	1.46e-15	T	NM_001102; NM_001130004; NM_001130005; ENST00000193403; ENST00000376839; ENST00000394419; ENST00000438964; ENST00000538545; ENST00000544964; ENST00000553290; ENST00000553370; ENST00000553659; ENST00000553779; ENST00000553882; ENST00000554158; ENST00000554508; ENST00000555075; ENST00000555616; ENST00000556083; ENST00000556203; ENST00000556343; ENST00000556432; ENST00000556433; ENST00000556571; BC0…	chr14	-	Multiple_Complex	10	14q24|14q22-q24; 14q24.1
		actinin, alpha 2	TC0100012099.hg.1	ACTN2		7.62695	7.92264	7.5154	7.28306	8.52777	7.749	0.688801	8.00475	8.58573	7.06237	7.57568	6.76993	7.70004	8.11451	7.81852	7.55691	7.96379	7.54337	18.0134	18.0258	18.1477	18.0723	7.08034	7.03594	7.72247	6.78034	7.81727	7.64748	0.628873	0.210444	T	T	1.12489	0.589057	0.849219	1.9e-21	1.42e-19	T	NM_001103; NM_001278343; NM_001278344; ENST00000366578; ENST00000461367; ENST00000492101; ENST00000492634; ENST00000494762; ENST00000542672; ENST00000546208; BC047901; BC051770; OTTHUMT00000096628; OTTHUMT00000096629; OTTHUMT00000096630; OTTHUMT00000096631; OTTHUMT00000099199	chr1	+	Multiple_Complex	10	1q42-q43
		actinin, alpha 3 (gene/pseudogene)	TC1100008090.hg.1	ACTN3		2.66309	3.75139	3.50194	2.98524	3.53653	3.63394	0.846456	4.11861	3.05068	3.35812	2.84806	3.21435	3.27399	3.56191	4.40996	3.9388	4.98023	3.74961	10.9483	11.4931	11.5322	11.4288	3.40018	3.32597	3.05345	3.29124	3.58325	3.49214	0.349814	0.57013	F	F	1.06519	0.789866	0.936174	6.32e-19	1.66e-17	F	NM_001104; NM_001258371; NR_047663; ENST00000502692; ENST00000511191; ENST00000513398; BC099647; BC099649; OTTHUMT00000362453; OTTHUMT00000362465; OTTHUMT00000362467	chr11	+	Multiple_Complex	10	11q13.1
		actinin, alpha 4	TC1900008020.hg.1	ACTN4		13.9876	14.675	13.9166	13.4716	14.5464	14.7161	0.915745	14.6024	14.2781	15.3024	14.3121	14.5376	14.3772	14.3529	11.404	11.5154	11.6589	11.4416	11.2953	12.0335	12.308	12.0888	15.3716	15.3847	15.2331	15.3385	14.6278	13.9535	0.674863	0.418875	T	T	1.59577	0.851969	0.960596	6.55e-13	2.74e-12	T	NM_004924; ENST00000252699; ENST00000390009; ENST00000424234; ENST00000440400; ENST00000477174; ENST00000489451; ENST00000495553; ENST00000497637; ENST00000586538; ENST00000588618; ENST00000589528; BC005033; OTTHUMT00000268091; OTTHUMT00000268092; OTTHUMT00000268093; OTTHUMT00000268094; OTTHUMT00000268095; OTTHUMT00000268096; OTTHUMT00000459232; OTTHUMT00000459235; OTTHUMT00000459236; OTTHUMT0000…	chr19	+	Multiple_Complex	10	19q13
		actin-related protein 10 homolog (S. cerevisiae)	TC1400007298.hg.1	ACTR10		11.4357	11.3733	11.4854	11.107	11.0816	11.2627	0.0125775	11.5658	13.0772	12.5143	9.44391	9.7451	9.77277	9.39443	9.96191	10.2963	9.85162	9.98575	10.1065	9.299	10.3373	10.0382	10.078	10.157	10.0345	10.1569	11.0948	11.4325	0.0980701	0.0561762	T	T	-1.26373	0.190225	0.542473	1.18e-11	3.84e-11	T	NM_018477; ENST00000254286; ENST00000545307; ENST00000553907; ENST00000554402; ENST00000554642; ENST00000554790; ENST00000555229; ENST00000555337; ENST00000555965; ENST00000556243; ENST00000556312; ENST00000556449; ENST00000556694; ENST00000556748; ENST00000557583; ENST00000557711; BC011997; OTTHUMT00000411404; OTTHUMT00000411405; OTTHUMT00000411406; OTTHUMT00000411407; OTTHUMT00000411408; OTTHUM…	chr14	+	Multiple_Complex	10	14q23.1
		ARP1 actin-related protein 1 homolog A, centractin alpha (yeast)	TC1000011683.hg.1	ACTR1A		10.7354	10.3149	10.9826	10.4144	10.39	10.4849	0.276704	9.38725	10.218	9.6037	10.6854	10.2315	10.6959	10.5121	11.1957	10.9176	11.0228	11.325	11.7973	11.8558	12.2949	11.7686	10.9036	10.6023	10.4257	10.4382	10.4182	10.698	0.0492828	0.337567	T	T	-1.21404	0.235309	0.593894	1.41e-08	2.79e-08	T	NM_005736; ENST00000369905; ENST00000470322; ENST00000480947; ENST00000481044; ENST00000487599; ENST00000494549; BC000693; BC026016; OTTHUMT00000050053; OTTHUMT00000050054; OTTHUMT00000050055; OTTHUMT00000050056; OTTHUMT00000050057; OTTHUMT00000050058	chr10	-	Multiple_Complex	10	10q24.32
		ARP1 actin-related protein 1 homolog B, centractin beta (yeast)	TC0200013573.hg.1	ACTR1B		10.6414	10.2156	10.3526	10.6244	10.3713	10.1774	0.949601	9.17407	8.71734	8.55936	9.62517	9.72327	9.78881	9.59616	8.85532	8.36579	8.62693	8.26204	10.1655	9.98368	9.8683	10.2589	10.2552	10.0857	10.1655	10.1618	10.386	10.3791	0.224187	0.217378	T	T	1.00481	0.947709	0.987873	2.62e-10	6.7e-10	T	NM_005735; ENST00000289228; ENST00000451664; ENST00000460427; BC004374; BC006372; BC010090; OTTHUMT00000252973; OTTHUMT00000329288; OTTHUMT00000329289	chr2	-	Multiple_Complex	10	2q11.2
		ARP2 actin-related protein 2 homolog (yeast)	TC0200007835.hg.1	ACTR2		13.2629	13.2554	12.9942	13.1957	13.2799	13.3509	0.350562	12.2249	11.762	12.9288	13.5144	13.4057	13.449	13.6304	12.5715	12.4235	12.6126	12.6093	12.8794	13.0421	13.0454	12.9404	14.8818	14.837	14.6257	14.7252	13.2765	13.259	0.0776941	0.153011	T	T	1.01217	0.491677	0.794174	5.63e-13	2.39e-12	T	NM_001005386; NM_005722; ENST00000260641; ENST00000377982; ENST00000471552; ENST00000476840; ENST00000542850; BC014546; BC036253; OTTHUMT00000251730; OTTHUMT00000327567; OTTHUMT00000327568; OTTHUMT00000327569	chr2	+	Multiple_Complex	10	2p14
		ARP3 actin-related protein 3 homolog (yeast)	TC0200008996.hg.1	ACTR3		12.2559	13.6734	12.6514	12.8468	13.1971	13.5814	0.502142	6.0555	7.49605	9.4618	12.7584	12.9444	12.6046	12.8508	13.0139	13.2273	12.8124	12.4672	12.4406	12.4697	12.9304	12.4133	13.5983	13.5769	13.4941	14.0248	13.206	12.7265	0.367432	0.731455	T	T	1.39433	0.228722	0.586797	4.76e-15	3.3e-14	T	NM_001277140; NM_005721; NR_102318; ENST00000263238; ENST00000415792; ENST00000443297; ENST00000446821; ENST00000478928; ENST00000484165; ENST00000489779; ENST00000535589; BC044590; OTTHUMT00000331366; OTTHUMT00000331367; OTTHUMT00000331425; OTTHUMT00000331499; OTTHUMT00000331500; OTTHUMT00000331501; OTTHUMT00000331502; OTTHUMT00000467675	chr2	+	Multiple_Complex	10	2q14.1
		ARP3 actin-related protein 3 homolog B (yeast)	TC0700009748.hg.1	ACTR3B		7.9042	8.01038	7.34305	7.98182	7.93476	7.76643	0.549326	8.19805	7.10119	6.86301	8.53734	8.35083	8.12552	8.56763	7.95811	7.7122	7.54738	7.59374	7.27359	7.76997	7.5664	6.98801	5.98011	6.6871	6.65833	5.82653	7.93623	7.95512	0.113242	0.358583	T	T	-1.01318	0.571796	0.838787	2.55e-07	4.31e-07	T	NM_001040135; NM_020445; NR_073000; NR_073001; ENST00000256001; ENST00000377776; ENST00000397282; ENST00000479402; ENST00000488782; BC008682; BC015207; OTTHUMT00000322754; OTTHUMT00000322803; OTTHUMT00000322804; OTTHUMT00000322806; OTTHUMT00000322807	chr7	+	Multiple_Complex	10	7q36.1
		ARP3 actin-related protein 3 homolog C (yeast)	TC0700013022.hg.1	ACTR3C		6.77958	8.23641	5.92018	6.89289	7.65294	7.40749	0.658841	5.3701	3.2582	5.96555	8.96107	9.02672	9.14952	9.11388	6.86544	6.38143	6.62133	6.64018	6.15233	6.18819	6.01308	5.32784	5.66161	5.16781	5.87023	5.56079	7.36006	6.90866	0.387886	1.17089	T	T	1.36736	0.36561	0.711156	6.69e-10	1.61e-09	T	NM_001164458; NM_001164459; ENST00000252071; ENST00000477367; ENST00000477871; ENST00000478393; ENST00000539352; ENST00000613959; OTTHUMT00000350675; OTTHUMT00000350676; OTTHUMT00000350677; OTTHUMT00000350678	chr7	-	Multiple_Complex	10	7q36.1
		ARP5 actin-related protein 5 homolog (yeast)	TC2000007329.hg.1	ACTR5		5.72114	5.77969	5.52098	5.2784	5.7162	5.8558	0.779455	5.40473	6.02595	3.96648	5.27058	6.30076	5.73605	5.53259	7.07729	6.94749	6.96475	7.06933	5.85212	6.22446	6.2157	6.33435	6.12544	5.40716	5.76141	5.74466	5.70201	5.71984	0.301261	0.135661	T	T	-1.01244	0.806421	0.942598	1.93e-07	3.31e-07	T	NM_024855; ENST00000243903; BC038402; OTTHUMT00000079205	chr20	+	Multiple_Complex	10	20q11.23
		ARP6 actin-related protein 6 homolog (yeast)	TC1200008591.hg.1	ACTR6		9.78083	9.50076	9.69221	9.97424	9.50605	9.64076	0.776804	5.52393	8.15934	8.68213	9.73382	9.37459	9.47756	9.6506	10.2789	10.4483	10.27	10.6436	9.3306	9.24949	9.58369	9.28937	10.1415	10.1742	10.1111	10.1842	9.66721	9.67479	0.241025	0.143147	T	T	-1.00527	0.776837	0.93114	8.64e-14	4.42e-13	T	NM_022496; NR_048568; NR_048569; ENST00000188312; ENST00000546902; ENST00000547458; ENST00000548180; ENST00000549977; ENST00000550813; ENST00000551440; ENST00000551517; ENST00000551617; ENST00000551652; ENST00000552064; ENST00000552376; ENST00000553038; BC015107; OTTHUMT00000408157; OTTHUMT00000408158; OTTHUMT00000408159; OTTHUMT00000408160; OTTHUMT00000408161; OTTHUMT00000408162; OTTHUMT00000408…	chr12	+	Multiple_Complex	10	12q23.1
		ARP8 actin-related protein 8 homolog (yeast)	TC0300011222.hg.1	ACTR8		7.39129	7.201	7.43371	7.10709	6.70572	7.0913	0.0666379	6.10908	5.68324	6.63168	6.58696	7.26883	6.5538	6.48971	7.48593	6.99132	6.96752	6.92158	6.79593	6.93902	7.09996	6.77391	6.95082	6.85951	6.57024	6.93409	7.09887	7.40751	0.22731	0.123938	T	T	-1.23854	0.0894625	0.380667	0.000527741	0.000636398	T	NM_022899; ENST00000335754; ENST00000482349; ENST00000486794; ENST00000488802; ENST00000495993; ENST00000498740; BC032744; OTTHUMT00000350562; OTTHUMT00000351654; OTTHUMT00000351655; OTTHUMT00000351656; OTTHUMT00000351657; OTTHUMT00000351658	chr3	-	Multiple_Complex	10
		actin-related protein T1	TC0X00010770.hg.1	ACTRT1		3.19627	2.96255	3.60617	3.65909	4.03712	3.22697	0.267919	3.3235	3.1683	3.53634	3.07973	3.0481	4.64319	3.63313	3.57008	3.26515	3.27775	3.28011	4.04153	3.38597	3.29748	3.1321	4.20104	2.99016	3.92222	2.82581	3.645	3.23338	0.405376	0.325804	F	F	1.33017	0.314738	0.671447	0.967641	0.967641	F	NM_138289; ENST00000371124; BC014597; OTTHUMT00000058192	chrX	-	Coding	10	Xq25
		actin-related protein T2	TC0100006602.hg.1	ACTRT2		4.98647	5.22337	5.09486	4.47136	4.22272	4.85539	0.0407481	4.98803	4.71726	4.40979	4.46336	4.13328	4.39952	3.23981	9.38817	9.40051	9.92535	9.64225	4.46319	3.85156	3.98257	4.59244	3.79097	4.1449	4.20112	3.87074	4.50242	5.10004	0.31874	0.118592	T	T	-1.51322	0.0423936	0.260514	6.3e-16	5.62e-15	T	NM_080431; ENST00000378404; BC029499; OTTHUMT00000001331	chr1	+	Coding	10	1p36.32
		actin-related protein T3	TC0300013080.hg.1	ACTRT3		4.20576	3.39706	4.23695	3.7247	3.61718	3.92543	0.545653	4.87786	5.00768	4.47336	5.105	4.37391	4.01894	5.24733	9.13387	9.42822	9.00047	9.12539	3.90886	4.74372	4.12753	4.56121	3.54513	3.97686	3.58787	3.78954	3.74333	4.22072	0.156456	0.476162	F	F	-1.39223	0.514449	0.806518	5.44e-15	3.71e-14	F	NM_032487; ENST00000330368; BC007289; OTTHUMT00000467797	chr3	-	Coding	10	3q26.2
		activin A receptor type I	TC0200014697.hg.1	ACVR1		8.73678	8.94325	8.53422	9.17859	8.60016	7.87828	0.66208	11.1475	10.108	9.35709	8.80194	8.87066	8.72695	8.7949	6.16566	6.0852	6.27376	5.89547	9.27386	9.58622	9.41074	8.70647	7.76204	6.97352	7.46123	7.40911	8.56387	8.73783	0.651472	0.204518	T	T	-1.12816	0.490694	0.793557	3.03e-12	1.11e-11	T	NM_001105; NM_001111067; ENST00000263640; ENST00000409283; ENST00000410057; ENST00000412025; ENST00000413751; ENST00000424669; ENST00000434821; ENST00000440523; ENST00000487456; ENST00000539637; BC033867; OTTHUMT00000254927; OTTHUMT00000332949; OTTHUMT00000332969; OTTHUMT00000332970; OTTHUMT00000332971; OTTHUMT00000332972; OTTHUMT00000332973; OTTHUMT00000333004; OTTHUMT00000402326	chr2	-	Multiple_Complex	10	2q23-q24
		activin A receptor type IB	TC1200007647.hg.1	ACVR1B		7.0444	7.3094	7.05592	8.54702	6.37839	7.26564	0.70288	6.79883	6.00139	6.10669	10.4872	10.2461	10.3759	10.4715	8.74994	8.57358	8.65048	8.60485	8.07096	8.77498	8.64684	8.27627	8.62393	8.46387	8.54521	8.58323	7.35935	7.05039	1.09027	0.149783	T	T	1.23881	0.421864	0.751503	2.84e-10	7.24e-10	T	NM_004302; NM_020327; NM_020328; ENST00000257963; ENST00000415850; ENST00000426655; ENST00000536420; ENST00000541224; ENST00000542485; ENST00000563121; BC000254; BC040531; OTTHUMT00000397000; OTTHUMT00000397001; OTTHUMT00000397002; OTTHUMT00000397003; OTTHUMT00000397004; OTTHUMT00000397005; OTTHUMT00000421345	chr12	+	Multiple_Complex	10	12q13
		activin A receptor type IC	TC0200014694.hg.1	ACVR1C		3.7782	3.57895	4.28061	9.30555	4.11294	4.27559	0.30493	6.53411	4.5751	5.28016	4.97071	5.68469	5.12706	5.48766	4.86878	4.92771	5.48405	5.83161	5.42585	5.32015	4.98355	4.67577	4.01054	5.20358	3.89425	4.05393	4.19758	3.81685	2.95212	0.361581	T	F	1.302	0.0175486	0.166852	0.195223	0.198499	F	NM_001111031; NM_001111032; NM_001111033; NM_145259; ENST00000243349; ENST00000335450; ENST00000348328; ENST00000409680; BC022530; OTTHUMT00000254924; OTTHUMT00000332946; OTTHUMT00000332947; OTTHUMT00000332948	chr2	-	Multiple_Complex	10	2q24.1
		activin A receptor type IIA	TC0200009596.hg.1	ACVR2A		8.53332	8.0834	8.02324	8.6648	8.38138	7.95595	0.66821	8.46273	10.0982	10.3926	8.625	8.21707	8.35027	8.58945	8.41973	8.22516	8.37495	8.73926	9.19118	8.53988	8.79498	8.7141	8.0991	7.87043	7.99997	7.95721	8.34828	8.05455	0.356788	0.278756	T	T	1.22581	0.574037	0.839693	2.93e-07	4.91e-07	T	NM_001278579; NM_001278580; NM_001616; ENST00000241416; ENST00000404590; ENST00000462659; ENST00000465329; ENST00000487959; ENST00000495775; ENST00000535787; BC067417; BC067418; BC069707; OTTHUMT00000319051; OTTHUMT00000319052; OTTHUMT00000319053; OTTHUMT00000319054; OTTHUMT00000332383; OTTHUMT00000332384	chr2	+	Multiple_Complex	10	2q22.3
		activin A receptor type IIB	TC0300007077.hg.1	ACVR2B		8.06645	7.61358	6.67079	7.12751	7.44033	7.53471	0.856466	5.4213	6.05515	6.75724	4.89048	5.53959	5.64906	5.26066	6.78891	6.60024	6.60846	6.91689	5.87079	5.10856	5.85147	5.29066	5.27774	5.47877	5.74149	5.56966	7.43524	7.52648	0.213141	0.712017	T	T	-1.06528	0.772044	0.929017	4.1e-08	7.65e-08	T	NM_001106; ENST00000352511; ENST00000461232; ENST00000465020; BC096243; BC096244; BC096245; BC099642; OTTHUMT00000254059; OTTHUMT00000323855; OTTHUMT00000323856	chr3	+	Multiple_Complex	10	3p22
		Memczak2013 ANTISENSE, CDS, coding, INTERNAL, intronic best transcript NM_001077401	TC1200010719.hg.1	ACVRL1		7.54123	7.08395	8.24929	8.72009	7.92246	7.41643	0.481089	7.80752	8.20088	8.85865	7.05897	6.9246	6.33362	7.26897	6.31387	6.48276	6.62583	7.03276	7.704	8.26062	8.0248	8.72255	8.22168	9.16852	8.24679	8.18858	7.98855	7.59867	0.657243	0.58715	T	T	1.31028	0.273038	0.632069	3.26e-05	4.41e-05	T	hsa_circ_0000401	chr12	-	NonCoding	6
		activin A receptor type IL	TC1200007646.hg.1	ACVRL1		7.01093	7.2377	7.42973	8.71684	7.56786	7.22462	0.26146	8.11425	8.58472	9.65329	7.02123	7.26896	7.00318	7.32883	6.30301	6.50726	6.68797	6.82179	7.93775	8.431	8.30516	8.13106	9.18099	9.47878	9.21646	9.20122	7.58293	7.22874	0.781525	0.20964	T	T	1.27827	0.0301007	0.219891	1.24e-09	2.85e-09	T	NM_000020; NM_001077401; ENST00000388922; ENST00000419526; ENST00000547400; ENST00000547632; ENST00000550084; ENST00000550683; ENST00000551576; ENST00000552678; BC042637; OTTHUMT00000404519; OTTHUMT00000404520; OTTHUMT00000404522; OTTHUMT00000404523; OTTHUMT00000404524; OTTHUMT00000404525; OTTHUMT00000404526; OTTHUMT00000404971	chr12	+	Multiple_Complex	10	12q13.13
		aminoacylase 1	TC0300013839.hg.1	ACY1		7.91878	8.00451	8.39257	6.98054	7.26163	7.69654	0.0356294	8.27458	8.88595	8.34274	12.7151	12.6195	12.5754	12.3259	5.90475	4.74013	5.30567	4.99089	6.42472	7.6503	6.55068	6.87047	6.29302	6.53925	5.62736	5.78574	7.29688	7.97057	0.360743	0.25246	T	T	-1.59515	0.0186845	0.170906	2.58e-16	2.57e-15	T	NM_000666; NM_001198895; NM_001198896; NM_001198897; NM_001198898; ENST00000404366; ENST00000464587; ENST00000465121; ENST00000468068; ENST00000469863; ENST00000476351; ENST00000476854; ENST00000490244; ENST00000491318; ENST00000494103; ENST00000496679; BC000545; BC003023; BC014112; OTTHUMT00000349657; OTTHUMT00000349658; OTTHUMT00000349660; OTTHUMT00000349661; OTTHUMT00000349662; OTTHUMT00000349…	chr3	+	Multiple_Complex	10	3p21.1
		aminoacylase 3	TC1100011348.hg.1	ACY3		4.17883	4.26922	3.70472	3.87163	4.09395	3.5535	0.419609	4.87171	5.0326	5.0483	8.79836	8.77424	8.56855	8.84865	3.30013	3.24935	3.0262	3.47083	4.27525	4.27161	3.4892	3.69152	3.99412	4.24541	4.16519	3.925	3.84875	4.22218	0.271637	0.303208	T	T	-1.29543	0.345884	0.694724	2.95e-17	4.12e-16	T	NM_080658; ENST00000255082; ENST00000529256; BC008689; OTTHUMT00000394002; OTTHUMT00000394003; uc001omq.3	chr11	-	Coding	10	11q13.2
		acylphosphatase 1, erythrocyte (common) type	TC1400009710.hg.1	ACYP1		8.28345	7.35074	7.51645	6.97739	7.04406	7.46604	0.163735	8.12111	8.70577	9.52992	5.61052	4.90412	4.59383	4.66304	7.61177	7.45171	7.18407	7.37469	8.11776	7.99252	8.32972	8.11502	5.87369	6.16797	6.27608	6.37084	7.01208	7.44592	0.264981	0.497611	T	T	-1.35082	0.039745	0.251981	2.64e-12	9.75e-12	T	NM_001107; NM_001302616; NM_001302617; NR_126393; NR_126394; NR_126395; ENST00000238618; ENST00000357971; ENST00000553302; ENST00000555135; ENST00000555463; ENST00000555694; BC035568; OTTHUMT00000415013; OTTHUMT00000415014; OTTHUMT00000415015; OTTHUMT00000415016; OTTHUMT00000415017; OTTHUMT00000415018	chr14	-	Multiple_Complex	10	14q24.3
		acylphosphatase 2, muscle type	TC0200016447.hg.1	ACYP2		11.0224	10.2141	11.3433	10.4653	9.65174	10.1725	0.137285	10.7951	11.1376	12.4083	8.63625	8.71471	8.63131	8.80075	7.91094	7.87114	8.04188	7.77299	11.4232	11.6793	12.1736	11.7633	7.89471	7.96609	7.51092	7.83626	10.125	10.9601	0.412083	0.581888	T	T	-1.78399	0.00551078	0.0910595	6.33e-15	4.25e-14	T	NM_138448; ENST00000303536; ENST00000394666; ENST00000406041; ENST00000494922; ENST00000606865; BC012290; OTTHUMT00000251415; OTTHUMT00000324067; OTTHUMT00000324068; OTTHUMT00000326175; OTTHUMT00000470831	chr2	+	Multiple_Complex	10	2p16.2
		acylphosphatase 2, muscle type	TC0200016446.hg.1	ACYP2		8.35131	7.6021	7.90637	7.95274	7.52441	8.1157	0.766579	7.57137	7.06313	7.35209	7.316	7.49208	7.40766	7.05222	8.34714	8.45403	8.0622	8.06804	7.45956	7.40907	7.52297	7.12588	7.79495	7.68807	7.24432	7.68891	7.92241	7.93961	0.305409	0.3768	T	T	-1.01199	0.683164	0.895466	0.000827283	0.000980091	T	ENST00000422521; ENST00000458030; ENST00000606082; OTTHUMT00000470823; OTTHUMT00000470824; OTTHUMT00000470826	chr2	+	Multiple_Complex	10	2p16.2
		adenosine deaminase	TC2000009198.hg.1	ADA		3.87733	3.78667	3.51418	4.26037	4.07858	4.31939	0.0196641	5.34163	5.48592	3.6166	3.65334	3.52102	3.66144	4.48013	3.38416	3.39451	3.40504	3.45822	3.50574	4.54056	3.98291	5.12659	7.11371	7.49119	7.54226	6.90318	4.25358	3.77481	0.125512	0.18901	F	F	1.39356	0.114471	0.427939	2.77e-11	8.38e-11	F	NM_000022; ENST00000372874; ENST00000464097; ENST00000492931; ENST00000535573; ENST00000536076; ENST00000536532; ENST00000537820; ENST00000539235; ENST00000545776; BC007678; BC040226; OTTHUMT00000080509; OTTHUMT00000127830; OTTHUMT00000127831; OTTHUMT00000402952; OTTHUMT00000402953; OTTHUMT00000402954; OTTHUMT00000402955; OTTHUMT00000402956; OTTHUMT00000402957	chr20	-	Multiple_Complex	10	20q13.12
		adenosine deaminase domain containing 1	TC0400008613.hg.1	ADAD1		4.00002	3.07697	3.56389	3.46359	3.37754	3.43038	0.669535	7.20685	4.92409	5.16873	3.90379	3.49663	3.40022	3.50935	14.4687	14.0998	13.4596	13.5054	3.99847	3.86401	3.10177	3.0484	3.3758	3.65386	3.86662	3.66674	3.42595	3.55056	0.0433965	0.461758	F	F	-1.09021	0.670966	0.890855	1.01e-21	8.61e-20	F	NM_001159285; NM_001159295; NM_139243; ENST00000296513; ENST00000388724; ENST00000388725; ENST00000439307; ENST00000446706; ENST00000464160; ENST00000492454; BC040229; OTTHUMT00000316452; OTTHUMT00000316453; OTTHUMT00000316454; OTTHUMT00000316455; OTTHUMT00000316456; OTTHUMT00000316457; OTTHUMT00000316458	chr4	+	Multiple_Complex	10	4q27
		adenosine deaminase domain containing 2	TC1600008640.hg.1	ADAD2		5.75711	5.50788	5.71766	5.9805	5.89384	5.106	0.998	5.43052	5.65282	5.68208	5.728	5.70371	5.96673	5.85316	9.63268	9.81205	9.8019	9.38824	5.81863	5.45689	5.53509	6.07554	5.71448	5.96468	5.59613	5.75824	5.9354	5.73658	0.481828	0.133965	T	T	1.14776	0.997179	0.999025	2.24e-15	1.71e-14	T	NM_001145400; NM_139174; ENST00000268624; ENST00000315906; ENST00000563849; ENST00000564169; ENST00000564430; ENST00000566526; ENST00000567413; ENST00000567685; ENST00000569221; BC033491; OTTHUMT00000269078; OTTHUMT00000433385; OTTHUMT00000433386; OTTHUMT00000433387; OTTHUMT00000433388; OTTHUMT00000433389; OTTHUMT00000433390; OTTHUMT00000433391; OTTHUMT00000433392	chr16	+	Multiple_Complex	10	16q24.1
		adenosine deaminase-like	TC1500007056.hg.1	ADAL		8.35161	7.9247	8.29448	8.24186	8.14781	8.0963	0.850255	6.80248	7.2047	7.82863	7.45002	7.53115	7.54448	7.85122	9.25229	8.31715	8.98708	8.53748	8.21867	8.55546	8.67218	8.49322	5.84653	6.68134	5.91305	6.00286	8.15648	8.32188	0.0738089	0.231752	T	T	-1.12147	0.906293	0.975113	5.31e-10	1.29e-09	T	NM_001012969; NM_001159280; ENST00000389651; ENST00000422466; ENST00000428046; ENST00000562188; ENST00000563551; ENST00000565555; ENST00000566154; ENST00000610420; BC075857; OTTHUMT00000432956; OTTHUMT00000432957; OTTHUMT00000432958; OTTHUMT00000432959; OTTHUMT00000432960; OTTHUMT00000432961	chr15	+	Multiple_Complex	10	15q15.3
		ADAM metallopeptidase domain 10	TC1500009574.hg.1	ADAM10		11.6317	11.1676	11.7475	11.3067	11.4617	11.1847	0.366383	10.9838	8.90562	10.1426	11.4806	11.3677	11.471	11.4314	10.5041	10.4997	10.513	10.504	10.7235	10.3519	10.407	10.7561	12.5059	12.5407	12.7433	12.4237	11.315	11.6549	0.138819	0.306879	T	T	-1.26565	0.264567	0.623535	2.01e-12	7.61e-12	T	NM_001110; ENST00000260408; ENST00000396136; ENST00000402627; ENST00000439637; ENST00000461408; ENST00000462061; ENST00000470269; ENST00000475898; ENST00000481164; ENST00000482945; ENST00000497846; ENST00000558004; ENST00000558733; ENST00000559053; ENST00000560608; ENST00000561149; ENST00000561288; BC126253; OTTHUMT00000255880; OTTHUMT00000257920; OTTHUMT00000257921; OTTHUMT00000257922; OTTHUMT00…	chr15	-	Multiple_Complex	10	15q22
		ADAM metallopeptidase domain 11	TC1700008014.hg.1	ADAM11		3.63225	3.25284	3.96072	3.79022	3.8202	3.66046	0.537427	3.17755	3.5725	2.88068	4.27155	4.01854	3.56513	3.70355	3.80475	4.19249	3.52203	3.53086	3.90572	3.80209	3.56804	4.29939	3.73666	3.35036	3.6651	3.50025	3.8	3.61902	0.0849052	0.354245	F	F	1.13365	0.548996	0.824571	0.0786711	0.0814707	F	NM_002390; ENST00000200557; ENST00000355638; ENST00000535346; ENST00000587773; ENST00000588363; OTTHUMT00000444531; OTTHUMT00000444532; OTTHUMT00000448652; OTTHUMT00000448653; OTTHUMT00000448654	chr17	+	Multiple_Complex	10	17q21.3
		ADAM metallopeptidase domain 12	TC1000012169.hg.1	ADAM12		4.62075	3.58565	4.2659	4.77671	4.40936	4.33792	0.351493	5.17415	3.69245	3.79742	4.68065	4.62033	4.855	4.20755	5.25845	5.24501	5.23031	4.81095	5.60287	4.78295	6.21221	4.9994	5.52171	5.63078	4.80903	4.96127	4.3751	4.20251	0.235438	0.526006	F	F	1.12708	0.279663	0.639263	0.000621947	0.000744809	F	NM_001288973; NM_001288974; NM_001288975; NM_003474; NM_021641; ENST00000368676; ENST00000368679; ENST00000448723; ENST00000467145; ENST00000482291; ENST00000485388; ENST00000494661; BC060804; OTTHUMT00000050961; OTTHUMT00000050962; OTTHUMT00000050963; OTTHUMT00000050964; OTTHUMT00000050965; OTTHUMT00000050966; OTTHUMT00000050967	chr10	-	Multiple_Complex	10	10q26
		ADAM metallopeptidase domain 15	TC0100018300.hg.1	ADAM15		6.49505	7.51563	7.01616	7.12422	6.41581	7.39748	0.946268	6.60979	7.16411	7.00077	8.25795	7.55521	8.02679	7.74144	6.77195	6.22319	6.62692	6.39695	7.53221	7.54647	8.41687	7.55422	7.98547	8.72221	7.76858	7.33596	7.07255	7.01037	0.506654	0.510328	T	T	1.04404	0.929061	0.98286	0.00045742	0.000554656	T	NM_001261464; NM_001261465; NM_001261466; NM_003815; NM_207191; NM_207194; NM_207195; NM_207196; NM_207197; NR_048577; NR_048578; NR_048579; ENST00000271836; ENST00000355956; ENST00000356955; ENST00000359280; ENST00000360674; ENST00000368412; ENST00000368413; ENST00000447332; ENST00000449910; ENST00000461234; ENST00000461564; ENST00000462116; ENST00000464824; ENST00000468053; ENST00000470779; ENS…	chr1	+	Multiple_Complex	10	1q21.3
		ADAM metallopeptidase domain 17	TC0200011688.hg.1	ADAM17	mut 1	8.41255	8.0809	8.67867	7.99804	8.41288	8.68306	0.926093	5.88669	6.03754	5.30237	8.54388	8.23201	7.89331	8.20302	9.49146	9.40411	9.15558	9.31263	10.3014	10.2842	10.6263	10.0961	9.73073	10.3383	9.75833	10.0478	8.37958	8.39596	0.345046	0.299483	T	T	-1.01142	0.907941	0.97536	1.63e-14	9.8e-14	T	NM_003183; ENST00000310823; ENST00000478059; ENST00000497134; ENST00000618923; BC136783; OTTHUMT00000206857; OTTHUMT00000317615; OTTHUMT00000353336	chr2	-	Multiple_Complex	10	2p25
		ADAM metallopeptidase domain 18	TC0800007377.hg.1	ADAM18		4.14609	4.04023	3.37375	4.21229	3.55264	2.99947	0.567142	5.04109	5.69521	5.37041	4.3121	3.40985	4.40146	3.91904	10.078	9.80015	9.80133	9.93283	3.66873	3.58987	3.91013	4.1718	4.15323	3.81358	3.36564	3.83266	3.58001	4.091	0.607189	0.41871	F	F	-1.42503	0.373596	0.71629	1.84e-16	1.93e-15	F	NM_001190956; NM_014237; ENST00000265707; ENST00000379866; ENST00000520001; ENST00000520087; ENST00000520559; ENST00000520772; ENST00000523755; ENST00000524117; BC121045; OTTHUMT00000376915; OTTHUMT00000376916; OTTHUMT00000376917; OTTHUMT00000376918; OTTHUMT00000376919; OTTHUMT00000376921; OTTHUMT00000376922; OTTHUMT00000376923	chr8	+	Multiple_Complex	10	8p11.22
		ADAM metallopeptidase domain 19	TC0500012599.hg.1	ADAM19		5.2542	4.91605	5.29845	5.58811	4.85888	6.03483	0.405307	5.56424	6.31999	6.49415	5.94845	6.20867	5.9382	6.0653	4.59932	5.07713	4.71481	5.25088	5.08667	5.30395	5.47316	5.60112	8.16083	7.41227	7.68203	7.95541	5.52547	5.27542	0.593604	0.209178	T	T	1.18925	0.197805	0.550332	5.14e-10	1.26e-09	T	NM_033274; ENST00000257527; ENST00000517374; ENST00000517905; ENST00000517951; ENST00000519752; OTTHUMT00000252566; OTTHUMT00000373916; OTTHUMT00000373917; OTTHUMT00000373918; OTTHUMT00000373919	chr5	-	Multiple_Complex	10	5q33.3
		ADAM metallopeptidase domain 2	TC0800010204.hg.1	ADAM2		4.46115	3.92285	4.14994	3.85539	4.61669	3.79962	0.789501	6.10322	5.51658	5.9066	3.86697	4.02701	4.47378	5.08937	12.0261	11.8493	11.6269	11.6853	5.1978	5.19353	4.5328	4.2748	4.51111	4.40703	4.5949	3.90971	3.82864	4.17044	0.456489	0.270243	T	T	-1.26733	0.775994	0.930824	5.69e-18	1.03e-16	T	NM_001278114; ENST00000265708; ENST00000347580; ENST00000379853; ENST00000520434; ENST00000521880; ENST00000523181; ENST00000622267; BC034957; BC064547; OTTHUMT00000376924; OTTHUMT00000376925; OTTHUMT00000376926; OTTHUMT00000376927; OTTHUMT00000376928; OTTHUMT00000376929	chr8	-	Multiple_Complex	10	8p11.2
		ADAM metallopeptidase domain 20	TC1400009579.hg.1	ADAM20		4.86977	4.15022	4.22933	4.83521	3.74583	3.63058	0.481585	4.65944	5.48144	4.58888	4.22498	3.98473	3.42754	3.84131	6.17706	5.96725	6.14533	6.52376	5.8913	4.21235	3.59584	4.15438	3.85542	4.04843	4.40677	4.15326	3.69055	4.19139	0.664726	0.394583	F	T	-1.41503	0.397734	0.732996	5.46e-05	7.21e-05	F	NM_003814; ENST00000256389; BC025378; OTTHUMT00000395004	chr14	-	Coding	10	14q24.1
		ADAM metallopeptidase domain 21	TC1400007576.hg.1	ADAM21		2.83054	2.98224	4.22381	3.32748	2.75986	3.31982	0.684398	3.86079	3.71152	3.00206	2.85266	3.4703	3.01451	2.71806	4.80537	4.70797	4.81093	3.9342	3.4882	2.99373	3.11699	3.17508	2.6569	3.03896	2.72529	3.10289	3.32349	2.90948	0.325527	0.764386	F	F	1.33238	0.497822	0.797289	0.00010863	0.000139381	F	NM_003813; ENST00000603540; BC109024; OTTHUMT00000413008	chr14	+	Multiple_Complex	10	14q24.1
		ADAM metallopeptidase domain 22	TC0700008265.hg.1	ADAM22		11.2267	11.8416	11.76	11.1649	11.5499	11.8179	0.733986	9.24527	9.24439	9.97442	5.38567	5.89925	5.35819	5.35019	6.36636	6.12652	6.47244	6.40448	6.41899	5.34553	6.37664	6.13956	6.62438	7.16785	6.99554	7.02412	11.522	11.7991	0.328218	0.333954	T	T	-1.21176	0.704944	0.905421	2.9e-18	5.83e-17	T	NM_004194; NM_016351; NM_021721; NM_021722; NM_021723; ENST00000265727; ENST00000398201; ENST00000398203; ENST00000398204; ENST00000398209; ENST00000412441; ENST00000413139; ENST00000426930; ENST00000439864; ENST00000476330; ENST00000478920; BC125118; OTTHUMT00000268368; OTTHUMT00000268369; OTTHUMT00000268370; OTTHUMT00000268371; OTTHUMT00000268372; OTTHUMT00000268373; OTTHUMT00000268377; OTTHUMT…	chr7	+	Multiple_Complex	10	7q21
		ADAM metallopeptidase domain 23	TC0200010577.hg.1	ADAM23		8.38264	9.97947	7.73902	9.67106	8.45523	8.25835	0.91157	8.45363	5.6112	5.52622	4.65244	4.22645	3.80783	4.65078	6.74121	6.95824	6.64699	6.32723	5.18806	5.13504	6.28167	5.14346	4.46923	5.1299	4.54677	5.59792	8.36081	8.50882	0.765153	1.15353	T	T	-1.10805	0.837162	0.955126	8.28e-10	1.96e-09	T	NM_003812; ENST00000264377; ENST00000374415; ENST00000444281; BC132763; BC132765; OTTHUMT00000256431; OTTHUMT00000336801; OTTHUMT00000336802	chr2	+	Multiple_Complex	10	2q33
		Memczak2013 ANTISENSE, coding, INTERNAL, intronic best transcript NM_014265	TC0800009898.hg.1	ADAM28		5.18019	4.48771	4.28451	5.06042	4.80364	4.34082	0.818396	4.33064	5.77549	5.47604	5.43423	4.63692	5.44407	4.58255	3.72074	3.78805	3.60026	3.6396	3.77695	4.67312	3.97676	4.62363	5.35125	5.57296	4.87935	4.77605	4.76119	4.49284	0.364683	0.469585	F	F	1.20442	0.782905	0.934017	9.81e-05	0.000126435	F	hsa_circ_0001783	chr8	-	NonCoding	6
		ADAM metallopeptidase domain 28	TC0800007040.hg.1	ADAM28		6.54095	6.98788	4.55612	7.57929	7.30539	7.15845	0.156482	5.88158	6.01636	5.40261	4.41925	4.76055	6.0707	5.46876	7.38043	7.32294	7.89448	7.63512	6.01854	5.95923	5.91339	5.62192	9.28567	9.74924	9.67582	9.64012	7.33079	6.70543	0.213588	1.29439	T	T	1.5426	0.00524451	0.0885322	2.58e-09	5.65e-09	T	NM_001304351; NM_014265; NM_021777; NR_130709; NR_130710; ENST00000265769; ENST00000437154; ENST00000518326; ENST00000518516; ENST00000518737; ENST00000520448; ENST00000520665; ENST00000521110; ENST00000521629; ENST00000523236; ENST00000523379; ENST00000523440; BC136478; OTTHUMT00000375441; OTTHUMT00000375442; OTTHUMT00000375443; OTTHUMT00000375545; OTTHUMT00000375546; OTTHUMT00000375547; OTTHUMT…	chr8	+	Multiple_Complex	10	8p21.2
		ADAM metallopeptidase domain 29	TC0400012864.hg.1	ADAM29		3.25009	3.65393	3.66557	4.78511	4.23944	4.28709	0.0145569	5.36694	6.08884	4.44278	3.72217	4.23828	4.6834	3.72841	6.06703	6.04525	5.90834	5.93277	2.99207	4.03873	3.51397	3.80788	3.68715	3.49153	3.78642	3.1961	4.26424	3.65951	0.302228	0.236589	F	F	1.52069	0.00225092	0.057269	1.31e-09	3e-09	F	ENST00000507652; OTTHUMT00000362381	chr4	+	NonCoding	10	4q34
		ADAM metallopeptidase domain 29	TC0400012865.hg.1	ADAM29		5.31371	5.61749	5.30776	4.6745	5.0349	4.87432	0.0194647	7.66807	6.82671	5.89274	4.49921	5.08876	4.86949	4.80606	10.1437	9.67865	10.1065	10.1274	4.32787	5.63502	4.45634	4.0409	4.99316	4.28502	5.27736	4.61108	4.86438	5.31086	0.180556	0.17713	T	T	-1.36271	0.0824611	0.364223	8.78e-15	5.68e-14	T	NM_001130703; NM_001130704; NM_001130705; NM_001278125; NM_001278126; NM_001278127; NM_014269; ENST00000359240; ENST00000404450; ENST00000445694; ENST00000502305; ENST00000502940; ENST00000505141; ENST00000510280; ENST00000513477; ENST00000514159; ENST00000515538; ENST00000615367; ENST00000618444; OTTHUMT00000362186; OTTHUMT00000362187; OTTHUMT00000362188; OTTHUMT00000362189; OTTHUMT00000362190; …	chr4	+	Multiple_Complex	10	4q34
		ADAM metallopeptidase domain 30	TC0100015481.hg.1	ADAM30		3.1466	3.43155	3.0078	2.89687	2.96119	3.37521	0.579089	3.27222	3.524	3.30716	3.49329	3.70103	3.07495	3.03687	6.39476	6.34964	5.52681	7.09712	3.28273	3.55019	3.54711	3.18164	3.30363	3.25705	2.90697	3.00319	2.93034	3.17304	0.259602	0.216035	F	F	-1.1832	0.675954	0.892396	7.12e-11	2.01e-10	F	NM_021794; ENST00000369400; BC028372; OTTHUMT00000033678	chr1	-	Coding	10	1p12
		ADAM metallopeptidase domain 32	TC0800007370.hg.1	ADAM32		5.60175	6.37876	5.51376	6.52865	5.99129	6.00646	0.351731	3.81731	6.48925	5.06507	4.8376	4.34872	4.37125	4.22972	10.7215	10.8104	11.2419	11.0733	5.65719	5.91601	5.49116	5.01935	4.3725	5.22027	4.80661	5.51783	5.99918	5.55955	0.30596	0.476045	T	T	1.35626	0.245243	0.603761	1.92e-16	2e-15	T	NM_145004; ENST00000379907; ENST00000399831; ENST00000437682; ENST00000517416; ENST00000518259; ENST00000519315; ENST00000520691; ENST00000521741; ENST00000522506; ENST00000523400; ENST00000524303; BC026085; BC026169; BC028702; BC030014; BC030698; BC034975; OTTHUMT00000377089; OTTHUMT00000377193; OTTHUMT00000377194; OTTHUMT00000377195; OTTHUMT00000377196; OTTHUMT00000377197; OTTHUMT00000377484; O…	chr8	+	Multiple_Complex	10	8p11.22
		ADAM metallopeptidase domain 33	TC2000008227.hg.1	ADAM33		4.87038	5.05418	4.64994	5.38725	5.18744	5.02625	0.0943865	6.41915	6.04178	5.61915	5.30843	5.47211	5.35506	5.36095	5.66734	5.59135	5.43714	5.25347	6.171	6.05737	5.56161	5.57218	5.39364	5.32098	4.99192	5.61844	5.19724	4.86098	0.180844	0.202397	T	F	1.26248	0.102241	0.406612	0.000169417	0.000213959	F	NM_001282447; NM_025220; NM_153202; ENST00000350009; ENST00000356518; ENST00000379861; ENST00000466620; ENST00000483362; ENST00000617732; ENST00000619289; BC125113; OTTHUMT00000077763; OTTHUMT00000077764; OTTHUMT00000077766; OTTHUMT00000252863	chr20	-	Multiple_Complex	10	20p13
		ADAM metallopeptidase domain 7	TC0800007043.hg.1	ADAM7		3.94389	3.38774	3.72232	3.74186	3.9008	3.27857	0.866513	5.13876	5.28841	4.68977	3.65453	3.35117	4.11512	4.25634	11.7047	12.0457	11.3955	11.9528	3.46009	4.0213	3.60863	4.30605	4.39796	3.62727	3.80587	3.74887	3.71833	3.69606	0.323283	0.279982	F	F	1.01555	0.87347	0.966695	1.35e-19	4.63e-18	F	NM_003817; ENST00000175238; ENST00000380789; ENST00000441335; ENST00000520720; OTTHUMT00000215150; OTTHUMT00000215151; OTTHUMT00000375718; OTTHUMT00000375719	chr8	+	Coding	10	8p21.2
		Memczak2013 ANTISENSE, CDS, coding, INTERNAL best transcript NM_001109	TC1000009454.hg.1	ADAM8		5.05437	4.92808	4.99712	5.13189	5.90454	5.60124	0.0721909	6.22878	6.73571	6.58119	5.25195	4.42649	5.18395	5.77759	4.70862	4.4898	5.21491	5.21637	5.42128	5.25495	4.72143	5.2013	5.31698	5.70371	5.16049	4.86295	5.56319	4.9941	0.389288	0.0632366	T	T	1.48359	0.0718792	0.340775	0.000551527	0.000663887	T	hsa_circ_0000270	chr10	+	NonCoding	6
		ADAM metallopeptidase domain 8	TC1000012389.hg.1	ADAM8		5.21292	5.5103	5.3776	5.35059	5.23546	5.369	0.638098	5.79574	6.13612	5.26847	5.43073	6.49912	5.83549	5.78406	5.43473	5.58931	5.73346	5.39639	6.0554	5.70421	5.99795	5.79857	6.13017	5.92785	6.00745	6.22755	5.35942	5.36949	0.0723728	0.148976	F	T	-1.007	0.816685	0.947132	0.00408958	0.0045916	F	NM_001109; NM_001164489; NM_001164490; ENST00000415217; ENST00000445355; ENST00000463298; ENST00000468964; ENST00000485491; ENST00000486609; ENST00000537099; ENST00000559018; ENST00000559180; ENST00000560135; ENST00000561175; BC115404; OTTHUMT00000051118; OTTHUMT00000051119; OTTHUMT00000051120; OTTHUMT00000051121; OTTHUMT00000418565; OTTHUMT00000418566; OTTHUMT00000418567; OTTHUMT00000418568; OTT…	chr10	-	Multiple_Complex	10	10q26.3
		ADAM metallopeptidase domain 9	TC0800007367.hg.1	ADAM9		8.51088	8.45237	7.99975	8.20789	7.92946	8.24789	0.368183	8.93233	7.76119	8.42818	8.33473	8.20532	8.68272	8.37273	7.82052	8.15048	7.998	7.79425	7.98085	8.97051	9.01719	8.82922	8.9489	9.45013	9.52787	9.97769	8.22707	8.48043	0.173456	0.279745	T	T	-1.19198	0.464738	0.778047	4.31e-05	5.75e-05	T	NM_003816; NR_027638; NR_027639; ENST00000379917; ENST00000463437; ENST00000466936; ENST00000468065; ENST00000481058; ENST00000481513; ENST00000481873; ENST00000484143; ENST00000487273; BC126406; BC143923; OTTHUMT00000357291; OTTHUMT00000357292; OTTHUMT00000357293; OTTHUMT00000357294; OTTHUMT00000357295; OTTHUMT00000357296; OTTHUMT00000357297; OTTHUMT00000357298; OTTHUMT00000377483	chr8	+	Multiple_Complex	10	8p11.22
		ADAM-like, decysin 1	TC0800007042.hg.1	ADAMDEC1		4.76707	4.4985	4.30948	4.63728	4.94921	3.90933	0.941033	4.84847	4.32328	4.72429	4.51757	4.98675	4.84513	4.64999	3.16278	3.35548	3.29484	3.38717	5.1536	4.76611	4.09483	3.8271	7.37751	7.54284	7.3483	7.99599	4.57496	4.51757	0.533629	0.229944	T	T	1.04058	0.92796	0.982325	1.58e-11	5e-11	T	NM_001145271; NM_001145272; NM_014479; ENST00000256412; ENST00000519953; ENST00000520193; ENST00000522298; BC069582; BC074877; BC074878; OTTHUMT00000215149; OTTHUMT00000375644; OTTHUMT00000375645; OTTHUMT00000375646; uc003xdz.2	chr8	+	Multiple_Complex	10	8p21.2
		ADAM metallopeptidase with thrombospondin type 1 motif 1	TC2100007821.hg.1	ADAMTS1		7.9021	6.49722	6.71239	7.74064	8.98266	9.24065	0.0639321	7.92727	8.09689	10.0725	9.10987	9.15142	9.19761	9.44661	8.98108	9.13309	8.97305	9.00873	11.2621	11.3632	11.7183	11.6121	9.27549	8.97312	8.82624	8.94478	9.10261	6.60919	0.801998	0.756681	T	T	5.63109	3.82e-05	0.00671526	1.31e-10	3.54e-10	T	NM_006988; ENST00000284984; ENST00000451462; ENST00000464589; ENST00000492656; ENST00000517452; ENST00000517777; BC036515; OTTHUMT00000171650; OTTHUMT00000171651; OTTHUMT00000171652; OTTHUMT00000171653; OTTHUMT00000381380; OTTHUMT00000381381	chr21	-	Multiple_Complex	10	21q21.2
		ADAM metallopeptidase with thrombospondin type 1 motif 10	TC1900009550.hg.1	ADAMTS10		6.04222	5.54809	5.88149	5.98468	5.88207	5.94877	0.483685	5.56069	4.86266	4.96312	5.95754	5.08779	6.09162	4.96131	4.89293	6.02331	5.41867	5.13928	5.35649	5.52849	5.68996	5.70468	5.16371	5.70524	5.62657	4.87461	5.94259	5.85065	0.0520693	0.252043	T	T	1.0658	0.704816	0.905365	0.164732	0.167958	T	NM_001282352; NM_030957; ENST00000270328; ENST00000593534; ENST00000593826; ENST00000593913; ENST00000595838; ENST00000596236; ENST00000596466; ENST00000596709; ENST00000596851; ENST00000596911; ENST00000597188; ENST00000601163; ENST00000601872; ENST00000603221; OTTHUMT00000460085; OTTHUMT00000460202; OTTHUMT00000460203; OTTHUMT00000460204; OTTHUMT00000460205; OTTHUMT00000460206; OTTHUMT000004602…	chr19	-	Multiple_Complex	10	19p13.2
		ADAM metallopeptidase with thrombospondin type 1 motif 12	TC0500010453.hg.1	ADAMTS12		5.25309	5.98685	5.80122	5.2985	6.32254	6.09009	0.588549	8.32105	8.40883	8.77558	6.11994	5.13906	6.12488	6.45401	5.42684	5.86368	5.36744	5.81602	6.38841	5.70325	5.99264	6.10508	5.0331	5.13077	5.17926	5.05556	6.08404	5.77503	0.536859	0.381512	T	T	1.23886	0.453912	0.771679	6.2e-09	1.28e-08	T	NM_030955; ENST00000352040; ENST00000504582; ENST00000504830; ENST00000506952; ENST00000509762; ENST00000515401; BC131733; OTTHUMT00000367163; OTTHUMT00000367164; OTTHUMT00000367165; OTTHUMT00000367166; OTTHUMT00000367499; OTTHUMT00000367500; uc003jib.1	chr5	-	Multiple_Complex	10	5q35
		ADAM metallopeptidase with thrombospondin type 1 motif 13	TSUnmapped00000220.hg.1	ADAMTS13		4.81599	4.31191	4.7817	4.40807	4.18759	4.86386	0.590833	4.69394	5.94277	6.12355	5.49816	5.57368	5.69666	4.9313	4.82358	4.27087	4.90853	4.6044	4.42596	4.36569	4.65865	5.17284	4.68137	4.7862	4.77334	4.83141	4.45027	4.79815	0.344891	0.281654	F	F	-1.27268	0.54365	0.822184	0.000121289	0.000155057	F	ENST00000626597			Coding	10	9q34
		ADAM metallopeptidase with thrombospondin type 1 motif 13	TSUnmapped00000159.hg.1	ADAMTS13		3.90324	3.38847	3.84546	3.89099	3.46242	3.46047	0.645253	4.81246	3.69711	4.05399	3.88944	4.25631	4.3476	4.06703	3.69545	3.42239	3.61817	3.66733	4.68838	4.25371	3.33431	4.25298	3.526	3.36197	3.19871	3.46951	3.46148	3.87317	0.248	0.282007	F	F	-1.33024	0.668937	0.889922	0.00455254	0.00509566	F	ENST00000626661			Coding	10	9q34
		ADAM metallopeptidase with thrombospondin type 1 motif 13	TSUnmapped00000418.hg.1	ADAMTS13		3.48918	3.25442	3.66509	4.46066	3.5992	3.28926	0.444654	4.14946	3.29283	4.14973	4.18673	3.14946	3.08263	3.74551	4.2032	4.94076	4.88821	4.82901	4.54563	3.55817	3.07071	3.79915	3.25985	3.48518	3.69335	3.23492	3.6516	3.47467	0.606953	0.206037	F	F	1.13047	0.365524	0.711156	0.0073701	0.00813221	F	ENST00000628339			NonCoding	10	9q34
		ADAM metallopeptidase with thrombospondin type 1 motif 13	TSUnmapped00000387.hg.1	ADAMTS13		5.87872	5.40779	5.48948	5.62923	5.31698	5.25885	0.362438	6.57366	5.05694	5.74655	5.12296	5.43286	5.25148	5.52264	4.72071	4.36077	5.2301	5.27324	5.78578	5.4421	5.07015	5.54774	4.66346	4.62592	4.99876	4.88071	5.2891	5.45219	0.19919	0.251646	T	T	-1.11968	0.422369	0.75154	0.000338487	0.000416015	T	ENST00000629604			Coding	10	9q34
		ADAM metallopeptidase with thrombospondin type 1 motif 13	TSUnmapped00000151.hg.1	ADAMTS13		6.50957	6.15086	6.22369	6.42978	6.08677	6.392	0.960413	6.66508	5.89111	6.11136	6.53837	7.08508	6.91163	6.80431	7.26202	6.44646	6.40799	6.25465	6.78367	6.45064	6.41002	6.04885	5.91189	6.25279	6.08544	6.37071	6.41012	6.21162	0.188082	0.189607	T	T	1.1475	0.972958	0.994194	0.0508146	0.0531334	T	ENST00000626744			Coding	10	9q34
		ADAM metallopeptidase with thrombospondin type 1 motif 13	TSUnmapped00000305.hg.1	ADAMTS13		6.02928	5.9274	5.90984	6.24618	5.90294	5.45943	0.728314	6.55691	6.15926	7.03519	5.98111	5.99019	6.44034	6.28463	5.40483	5.57231	5.78956	5.24023	6.30758	5.52916	5.26106	5.63119	4.90392	5.2024	5.17049	5.64821	5.8779	5.91898	0.394438	0.0644901	T	T	-1.02888	0.734557	0.916471	0.000345273	0.000424014	T	ENST00000630344			Coding	10	9q34
		ADAM metallopeptidase with thrombospondin type 1 motif 13	TSUnmapped00000675.hg.1	ADAMTS13		5.94301	5.91953	5.95696	5.88995	5.73102	6.03714	0.578408	6.76861	6.31397	6.09433	5.66703	6.33453	6.08221	6.22995	6.4422	6.19032	5.97333	5.94118	6.42661	6.03746	6.11172	5.67815	6.07746	6.19362	6.12726	5.9947	5.88684	5.94094	0.153097	0.0189162	T	T	-1.03821	0.791273	0.936644	0.220963	0.224151	T	ENST00000630465			Coding	10	9q34
		ADAM metallopeptidase with thrombospondin type 1 motif 13	TSUnmapped00000724.hg.1	ADAMTS13		3.26256	3.34463	3.13942	3.16875	3.4153	2.95495	0.659708	4.584	3.40447	3.77108	3.23668	4.09392	3.01496	3.17913	2.86193	2.88573	3.21136	3.11318	3.25042	3.20075	2.84301	3.25375	3.04902	3.15218	3.32476	3.20256	3.17726	3.25298	0.230369	0.103288	F	F	-1.05389	0.758567	0.925101	0.00400743	0.0045022	F	ENST00000630700			Coding	10	9q34
		ADAM metallopeptidase with thrombospondin type 1 motif 13	TSUnmapped00000129.hg.1	ADAMTS13		6.66762	6.86407	6.721	6.87987	6.3603	6.47357	0.345883	6.63769	7.71364	7.85103	6.4357	6.95622	6.77489	6.72123	6.80459	6.62314	6.57626	6.69603	6.45912	7.14936	6.57542	6.55156	6.78818	6.597	6.72795	6.91976	6.46957	6.73067	0.27321	0.10158	T	T	-1.19839	0.366012	0.711394	0.00123559	0.0014442	T	ENST00000626079			Coding	10	9q34
		ADAM metallopeptidase with thrombospondin type 1 motif 13	TC0900009077.hg.1	ADAMTS13		3.88614	3.71038	3.10923	3.09928	3.55956	3.44152	0.500413	3.8853	3.89824	3.5608	4.51029	5.03988	4.08861	4.77781	3.58617	3.76578	4.35151	3.74216	3.74621	3.87326	3.60607	3.54987	3.22614	3.35709	3.15608	2.85558	3.42372	3.70663	0.239067	0.407403	F	F	-1.21664	0.424482	0.752822	0.000152076	0.000192887	F	NM_139025; NM_139026; NM_139027; NR_024514; ENST00000355699; ENST00000356589; ENST00000371910; ENST00000371911; ENST00000371916; ENST00000371929; ENST00000474918; ENST00000485925; ENST00000495234; OTTHUMT00000054920; OTTHUMT00000054921; OTTHUMT00000054922; OTTHUMT00000054923; OTTHUMT00000054925; OTTHUMT00000054926; OTTHUMT00000314296	chr9	+	Multiple_Complex	10	9q34
		ADAM metallopeptidase with thrombospondin type 1 motif 14	TC1000007934.hg.1	ADAMTS14		3.45269	3.57418	3.40867	4.28514	3.76776	3.1326	0.499332	3.61017	3.89817	3.56363	3.48014	3.4596	3.42153	4.60461	4.08715	3.30387	2.97068	3.16469	3.78084	3.7914	3.91056	3.40935	3.61652	3.85766	3.34258	3.49558	3.73778	3.46026	0.577272	0.0857235	F	F	1.21211	0.431669	0.757151	0.885784	0.885991	F	NM_080722; NM_139155; ENST00000373207; ENST00000373208; OTTHUMT00000048521; OTTHUMT00000048522	chr10	+	Multiple_Complex	10	10q21
		ADAM metallopeptidase with thrombospondin type 1 motif 15	TC1100009533.hg.1	ADAMTS15		5.4873	5.02205	5.03794	4.75842	4.6986	4.58428	0.035484	6.51743	5.45785	5.47191	4.77472	4.53035	5.58189	4.96884	4.8183	4.57638	4.36963	4.91122	5.05471	4.44354	4.56588	4.94445	5.04469	4.94424	5.62243	5.12975	4.68795	5.03032	0.0884799	0.264145	T	T	-1.26784	0.0546714	0.297839	0.000754736	0.000897117	T	NM_139055; ENST00000299164; BC109114; OTTHUMT00000385638	chr11	+	Multiple_Complex	10	11q25
		ADAM metallopeptidase with thrombospondin type 1 motif 16	TC0500006613.hg.1	ADAMTS16		3.73996	3.13734	3.32748	2.64443	2.73931	2.83417	0.0236146	3.35465	4.28503	3.15777	4.58613	3.5869	4.38822	4.14184	3.38468	3.29685	3.33525	3.4643	3.33012	3.89525	2.85755	3.37816	2.55201	2.92028	3.28392	2.97568	2.7393	3.36491	0.0948701	0.30807	F	F	-1.54286	0.0163284	0.160638	0.000130684	0.000166632	F	NM_139056; ENST00000274181; ENST00000433402; ENST00000511368; ENST00000513709; OTTHUMT00000365657; OTTHUMT00000365658; OTTHUMT00000365659; OTTHUMT00000365661; uc003jdj.1	chr5	+	Multiple_Complex	10	5p15
		ADAM metallopeptidase with thrombospondin type 1 motif 17	TC1500010630.hg.1	ADAMTS17		7.25026	6.56533	6.42699	6.63431	6.56275	6.80432	0.776233	7.44154	7.68237	6.77915	11.0351	10.8011	11.1773	11.1941	7.09253	7.08898	7.45358	7.59857	9.56545	9.15788	9.62439	9.8767	7.19333	7.28472	7.24768	7.12261	6.64858	6.49913	0.124083	0.44084	T	T	1.10915	0.714761	0.908902	3.83e-16	3.64e-15	T	NM_139057; ENST00000268070; ENST00000378898; ENST00000557896; ENST00000558930; ENST00000558960; ENST00000559976; ENST00000560486; ENST00000561355; ENST00000568565; OTTHUMT00000313595; OTTHUMT00000417544; OTTHUMT00000417545; OTTHUMT00000417546; OTTHUMT00000417547; OTTHUMT00000417578; OTTHUMT00000417579; OTTHUMT00000417580; OTTHUMT00000420577	chr15	-	Multiple_Complex	10	15q24
		Memczak2013 ANTISENSE, coding, INTERNAL, intronic best transcript NM_139057	TC1500008537.hg.1	ADAMTS17		5.52795	5.72803	5.69124	5.38408	5.33336	4.74615	0.0817024	5.68388	7.54613	7.05213	5.1454	5.76879	5.73434	5.78138	5.1919	5.74696	6.28104	6.10903	6.50801	5.56746	6.1278	6.08198	5.76506	5.1787	5.83226	5.77677	5.35769	5.70472	0.354575	0.106497	F	F	-1.27194	0.0878194	0.377221	0.000119397	0.000152703	F	hsa_circ_0000661	chr15	+	NonCoding	6
		ADAM metallopeptidase with thrombospondin type 1 motif 18	TC1600010914.hg.1	ADAMTS18		3.66375	3.91961	3.72617	3.9107	3.76199	3.61896	0.960857	7.1517	4.63874	5.47362	3.86483	3.39619	4.11927	3.71861	3.36522	3.81979	3.38912	3.6987	3.44997	3.56741	3.60603	5.1096	3.20649	3.61519	4.2195	3.471	3.76351	3.73308	0.145879	0.133404	F	F	1.02132	0.985454	0.996794	2.67e-06	4.03e-06	F	NM_199355; ENST00000282849; ENST00000449265; ENST00000562332; ENST00000562345; ENST00000564369; ENST00000567121; ENST00000567914; ENST00000568393; ENST00000569309; BC063283; OTTHUMT00000269037; OTTHUMT00000433908; OTTHUMT00000433911; OTTHUMT00000433912; OTTHUMT00000433913; OTTHUMT00000433914; OTTHUMT00000433915; OTTHUMT00000433916; OTTHUMT00000433917; uc002ffc.4	chr16	-	Multiple_Complex	10	16q23
		ADAM metallopeptidase with thrombospondin type 1 motif 19	TC0500008586.hg.1	ADAMTS19		3.43114	3.14582	4.31093	7.16876	3.44822	4.25978	0.323802	4.6437	4.87791	4.80515	3.76511	3.89096	4.82134	4.30399	4.05677	4.50794	4.13159	4.30277	3.31532	3.9245	5.4459	4.45008	3.46425	3.08084	3.40966	3.1325	4.23171	3.46364	1.95632	0.607305	T	F	1.70299	0.0393265	0.250885	0.17472	0.178015	F	NM_133638; ENST00000274487; ENST00000502709; ENST00000505791; ENST00000509467; OTTHUMT00000250979; OTTHUMT00000371455; OTTHUMT00000371456; OTTHUMT00000371457	chr5	+	Multiple_Complex	10	5q23.3
		ADAM metallopeptidase with thrombospondin type 1 motif 2	TC0500013039.hg.1	ADAMTS2		5.30272	5.08846	4.88897	5.51193	5.27491	5.51678	0.0764534	5.15209	4.88665	5.7642	7.06897	7.16573	7.08494	6.93285	4.61249	4.74025	5.13856	5.06053	5.85782	5.34539	5.29528	4.99307	7.86423	8.06619	7.90627	7.98427	5.51426	5.09238	0.138265	0.206919	T	T	1.33967	0.101045	0.404182	9.63e-14	4.87e-13	T	NM_014244; NM_021599; ENST00000251582; ENST00000274609; ENST00000518335; ENST00000522937; ENST00000523450; OTTHUMT00000253507; OTTHUMT00000374453; OTTHUMT00000374454; OTTHUMT00000374455; OTTHUMT00000374456; uc003mjw.3	chr5	-	Multiple_Complex	10	5qter
		ADAM metallopeptidase with thrombospondin type 1 motif 20	TC1200010475.hg.1	ADAMTS20		3.295	3.39139	3.60082	2.96578	3.48869	3.55958	0.683972	4.89757	4.62923	3.99891	3.63291	4.40284	3.79855	3.5979	3.27938	3.15864	3.07676	3.41339	3.28815	4.04663	3.08228	4.3207	3.42509	3.64862	3.51099	3.24914	3.52269	3.41038	0.324309	0.156353	F	F	1.08096	0.740255	0.918702	0.00194267	0.0022376	F	NM_025003; ENST00000389420; ENST00000395541; ENST00000549670; ENST00000553158; OTTHUMT00000403643; OTTHUMT00000403644; OTTHUMT00000403645	chr12	-	Multiple_Complex	10	12q12
		ADAM metallopeptidase with thrombospondin type 1 motif 3	TC0400010989.hg.1	ADAMTS3		4.61658	4.89633	4.68021	3.48676	4.51231	4.85741	0.3488	4.8029	5.25098	4.62734	4.13939	3.95421	3.87466	4.01115	5.22187	4.53872	4.71724	4.84383	4.89214	4.22877	4.45481	3.73224	4.19199	3.55239	3.16288	3.61214	4.46488	4.68207	0.71292	0.146638	T	T	-1.16246	0.161556	0.504154	0.00249109	0.00284575	T	NM_014243; ENST00000286657; ENST00000505193; ENST00000511274; ENST00000622135; BC130287; BC132735; OTTHUMT00000252164; OTTHUMT00000362292; OTTHUMT00000362293; uc003hgk.2	chr4	-	Multiple_Complex	10	4q13.3
		ADAM metallopeptidase with thrombospondin type 1 motif 4	TC0100016163.hg.1	ADAMTS4		4.96793	5.06376	4.44237	4.78672	4.3502	4.54417	0.315903	4.2126	5.09408	4.40335	6.20096	6.15931	5.26688	5.80133	7.95098	7.61475	7.81633	7.49972	7.61024	7.803	7.84982	8.15472	8.78449	8.59572	8.40985	8.16804	4.55645	5.01389	0.21871	0.334545	F	F	-1.3731	0.28435	0.644238	4.19e-15	2.95e-14	F	NM_005099; ENST00000367995; ENST00000367996; ENST00000478394; BC063293; OTTHUMT00000083066; OTTHUMT00000083067; OTTHUMT00000083068	chr1	-	Multiple_Complex	10	1q21-q23
		ADAM metallopeptidase with thrombospondin type 1 motif 5	TC2100007822.hg.1	ADAMTS5		4.70371	4.46244	5.1841	5.20451	5.68537	4.82986	0.234049	5.11718	5.80974	5.80773	4.79513	4.31022	5.23875	5.74057	4.8551	4.44803	5.29278	4.86321	6.39211	7.2152	7.00957	6.77769	10.3638	10.1405	10.4224	10.6094	5.2311	4.7485	0.428852	0.367373	T	T	1.39726	0.152819	0.490533	9.01e-15	5.81e-14	T	NM_007038; ENST00000284987; BC093775; BC093777; OTTHUMT00000171648	chr21	-	Multiple_Complex	10	21q21.3
		ADAM metallopeptidase with thrombospondin type 1 motif 6	TC0500010924.hg.1	ADAMTS6		5.28716	4.18517	4.77175	4.22526	4.81726	4.7087	0.677315	7.57095	4.70715	4.75722	4.47	4.29164	3.81268	4.40731	8.09818	8.31848	8.12011	7.60254	4.0622	4.57355	4.23357	4.77764	5.18166	5.92928	5.34966	5.19153	4.74908	4.75318	0.315162	0.551378	T	T	-1.00285	0.562924	0.833025	2.45e-12	9.11e-12	T	NM_197941; ENST00000314351; ENST00000381052; ENST00000381055; ENST00000417396; ENST00000464680; ENST00000470597; ENST00000502886; ENST00000504282; OTTHUMT00000157331; OTTHUMT00000157334; OTTHUMT00000158252; OTTHUMT00000368524; OTTHUMT00000368525; OTTHUMT00000368526; OTTHUMT00000368527; OTTHUMT00000368528	chr5	-	Multiple_Complex	10	5q12
		ADAM metallopeptidase with thrombospondin type 1 motif 7	TC1500010157.hg.1	ADAMTS7		5.37608	5.38864	4.87949	4.98803	5.23984	5.42311	0.991933	6.18374	5.7337	5.61053	5.24352	4.20242	4.9584	5.49942	4.98953	5.14348	5.00839	5.4829	5.24579	5.47099	6.09681	5.16535	6.01226	5.97516	5.20467	5.85865	5.22316	5.3821	0.218438	0.2904	T	T	-1.11647	0.993959	0.998701	0.0511071	0.0534314	T	NM_014272; ENST00000388820; ENST00000565793; ENST00000566303; ENST00000568712; ENST00000569934; BC061631; OTTHUMT00000421331; OTTHUMT00000421332; OTTHUMT00000421333; OTTHUMT00000421334; OTTHUMT00000421335; uc002bej.4	chr15	-	Multiple_Complex	10	15q24.2
		ADAM metallopeptidase with thrombospondin type 1 motif 8	TC1100012834.hg.1	ADAMTS8		5.07583	4.58405	4.69674	4.14003	4.52521	5.15027	0.613529	5.02001	5.49912	4.23983	4.77229	4.58412	4.75023	5.14379	4.09014	4.86324	4.88123	4.92582	4.48129	5.45414	4.69273	5.17283	4.23424	4.96674	4.46923	4.66489	4.5786	4.70114	0.509845	0.257635	F	F	-1.08865	0.536408	0.818755	0.307492	0.310649	F	NM_007037; ENST00000257359; ENST00000531752; OTTHUMT00000385634; OTTHUMT00000385636	chr11	-	Multiple_Complex	10	11q25
		ADAM metallopeptidase with thrombospondin type 1 motif 9	TC0300011391.hg.1	ADAMTS9		5.54463	4.34905	4.47198	5.67638	5.81075	5.97432	0.0569584	7.05408	4.28659	7.20794	4.43355	6.0971	6.20855	5.81539	6.72038	7.28507	6.7975	6.54018	8.38388	7.63112	7.64388	6.57097	8.91306	7.88394	8.36965	8.7323	5.8182	4.41302	0.149208	0.65766	T	F	2.64851	0.02431	0.196121	4.98e-08	9.18e-08	F	NM_182920; ENST00000295903; ENST00000459780; ENST00000467119; ENST00000467257; ENST00000475557; ENST00000477180; ENST00000481060; ENST00000482490; ENST00000494004; ENST00000498707; BC130578; BC171764; OTTHUMT00000351891; OTTHUMT00000351892; OTTHUMT00000351893; OTTHUMT00000351894; OTTHUMT00000351895; OTTHUMT00000351896; OTTHUMT00000351897; OTTHUMT00000351898; OTTHUMT00000351899; OTTHUMT00000351900	chr3	-	Multiple_Complex	10	3p14.1
		ADAMTS like 1	TC0900006748.hg.1	ADAMTSL1		10.1	10.9855	10.4901	9.217	10.2828	10.4023	0.288007	11.3698	11.0579	9.6584	4.88879	4.98104	4.97492	5.37997	4.82813	4.74326	4.70435	4.54788	4.85041	4.90783	3.99348	4.84309	4.30975	3.97615	3.79726	4.15113	10.3401	10.5166	0.652582	0.443811	T	T	-1.13012	0.0636658	0.320352	6.18e-19	1.63e-17	T	NM_001040272; NM_052866; ENST00000276935; ENST00000327883; ENST00000380538; ENST00000380545; ENST00000380548; ENST00000380559; ENST00000380566; ENST00000380570; ENST00000388710; ENST00000431052; ENST00000489062; ENST00000496521; ENST00000542621; ENST00000546040; BC030262; OTTHUMT00000051800; OTTHUMT00000051801; OTTHUMT00000051802; OTTHUMT00000051803; OTTHUMT00000051804; OTTHUMT00000051807; OTTHUM…	chr9	+	Multiple_Complex	10	9p21.3
		ADAMTS like 2	TC0900009084.hg.1	ADAMTSL2		3.31439	3.92077	4.17511	4.69334	4.28603	4.69144	0.059594	3.20419	4.19109	4.91354	4.00916	3.84772	4.54295	4.25458	2.8885	2.71542	3.20433	3.26756	3.3647	3.97687	2.93115	4.08584	2.92413	3.3079	3.47908	3.30855	4.69235	3.8701	0.234614	0.442196	T	T	1.76816	0.0130208	0.143747	3.75e-05	5.03e-05	T	NM_001145320; NM_014694; ENST00000354484; ENST00000393060; ENST00000393061; BC050544; OTTHUMT00000254619; OTTHUMT00000254620; uc011mdl.2	chr9	+	Coding	10	9q34.2
		ADAMTS like 3	TC1500008127.hg.1	ADAMTSL3		6.92255	8.10909	5.48934	7.89281	8.2996	8.24492	0.164403	7.41067	5.0246	6.2776	9.34123	8.93172	8.64761	8.77813	6.926	6.92799	6.60481	6.86331	5.77086	5.32264	6.19142	6.81068	5.24492	5.20392	4.94209	5.66366	8.27115	6.85942	0.220775	1.31181	T	T	2.66056	0.00517784	0.0879397	4.04e-08	7.54e-08	T	NM_001301110; NM_207517; ENST00000286744; ENST00000561483; ENST00000562296; ENST00000565653; ENST00000567476; ENST00000567663; ENST00000567716; ENST00000569510; BC128389; BC128390; OTTHUMT00000304007; OTTHUMT00000420881; OTTHUMT00000420882; OTTHUMT00000420883; OTTHUMT00000420884; OTTHUMT00000420885; OTTHUMT00000420886; OTTHUMT00000420887	chr15	+	Multiple_Complex	10	15q25.2
		ADAMTS like 4	TC0100009913.hg.1	ADAMTSL4		5.41375	5.73623	4.90179	5.79749	5.68235	5.92309	0.149276	5.10545	7.35359	6.83285	7.96252	8.23271	8.5269	7.99139	5.49631	5.03788	5.03303	5.19981	7.54851	7.1688	7.17305	7.59179	6.28241	6.38024	6.42726	6.29831	5.80025	5.37099	0.120408	0.42079	T	T	1.34655	0.0436766	0.264476	6.73e-13	2.81e-12	T	NM_001288607; NM_001288608; NM_019032; NM_025008; ENST00000271643; ENST00000369038; ENST00000369039; ENST00000369041; ENST00000483335; ENST00000489159; ENST00000622417; BC140800; BC144581; OTTHUMT00000084395; OTTHUMT00000084396; OTTHUMT00000084397; OTTHUMT00000084400	chr1	+	Multiple_Complex	10	1q21.3
		ADAMTSL4 antisense RNA 1	TC0100018485.hg.1	ADAMTSL4-AS1		5.95671	5.26427	4.91221	5.76219	5.86733	5.28186	0.506387	5.09167	5.73021	5.09022	5.77822	5.2489	5.85099	6.02216	5.18658	5.21234	5.20076	4.84115	6.40244	6.34315	5.03108	5.84844	5.55279	5.40985	5.11415	5.75716	5.80516	5.32887	0.312129	0.531413	T	T	1.39116	0.410221	0.74217	0.150524	0.153727	T	NR_104133; ENST00000369035; ENST00000615012; ENST00000617352; BC132992	chr1	-	Multiple_Complex	10	1q21.2
		ADAMTS like 5	TC1900009165.hg.1	ADAMTSL5		6.70485	6.49052	6.44941	6.21145	6.3104	6.32625	0.0378789	8.13358	7.77646	6.7767	6.62743	6.46219	7.00838	6.94254	6.33427	6.63802	6.47781	6.7645	6.90386	6.92661	7.48323	6.61132	6.9455	6.35413	6.53544	6.53314	6.318	6.4708	0.0622111	0.13716	T	T	-1.11173	0.225278	0.583476	6.01e-05	7.9e-05	T	NM_213604; ENST00000330475; ENST00000395467; ENST00000585700; ENST00000585804; ENST00000586272; ENST00000589839; ENST00000590090; ENST00000590440; ENST00000590562; ENST00000590682; ENST00000591077; BC139833; OTTHUMT00000449713; OTTHUMT00000449715; OTTHUMT00000449716; OTTHUMT00000449718; OTTHUMT00000449719; OTTHUMT00000449721; OTTHUMT00000449722; OTTHUMT00000449723; OTTHUMT00000473833; OTTHUMT0000…	chr19	-	Multiple_Complex	10	19p13.3
		ArfGAP with dual PH domains 1	TC0700013500.hg.1	ADAP1		5.23847	4.82674	5.05308	5.43605	5.16648	5.44761	0.107742	7.1812	7.00225	6.3429	5.37023	5.6669	5.70442	5.79589	4.56138	4.65731	5.00413	4.7362	5.79642	5.32416	4.71847	5.06578	6.40969	6.61137	7.05128	6.19279	5.4416	5.04264	0.159078	0.206204	T	T	1.31855	0.210833	0.566731	2.6e-08	4.97e-08	T	NM_001284308; NM_001284309; NM_001284310; NM_001284311; NM_006869; ENST00000265846; ENST00000435943; ENST00000437486; ENST00000446141; ENST00000449296; ENST00000453175; ENST00000453823; ENST00000454383; ENST00000463358; ENST00000477906; ENST00000478000; ENST00000481406; ENST00000488527; ENST00000495686; ENST00000495809; ENST00000539900; ENST00000611167; ENST00000617043; BC033747; OTTHUMT000000597…	chr7	-	Multiple_Complex	10	7p22.3
		ArfGAP with dual PH domains 2	TC1700012226.hg.1	ADAP2		8.76204	9.34217	8.26308	8.56591	8.87694	8.86958	0.958239	7.54194	8.52429	8.88196	8.17145	8.45047	8.10564	8.57671	4.98511	5.11007	5.18724	4.86252	6.55683	6.89161	7.13268	6.64968	9.57557	9.34781	9.23954	9.31013	8.87311	8.78308	0.177487	0.540054	T	T	1.06439	0.936086	0.98465	5.55e-15	3.78e-14	T	NM_018404; ENST00000330889; ENST00000470962; ENST00000480980; ENST00000580525; ENST00000580526; ENST00000581285; ENST00000581548; ENST00000584828; ENST00000584989; ENST00000585130; BC033758; OTTHUMT00000256346; OTTHUMT00000256347; OTTHUMT00000256348; OTTHUMT00000444510; OTTHUMT00000444511; OTTHUMT00000444512; OTTHUMT00000444513; OTTHUMT00000444514; OTTHUMT00000444515; OTTHUMT00000444516	chr17	+	Multiple_Complex	10	17q11.2
		adenosine deaminase, RNA-specific	TC0100015921.hg.1	ADAR		9.49916	9.5269	9.97218	9.22202	9.16503	9.35703	0.0628353	4.47647	4.62634	7.97548	10.1456	10.5393	10.0289	9.9317	8.67928	7.99545	7.91529	7.8953	6.29249	7.85075	7.4883	6.73168	10.2713	10.0877	9.97552	10.3585	9.2334	9.5136	0.0986067	0.265453	T	T	-1.21436	0.17413	0.52366	1.56e-13	7.52e-13	T	NM_001025107; NM_001111; NM_001193495; NM_015840; NM_015841; ENST00000368471; ENST00000368474; ENST00000463920; ENST00000471068; ENST00000492630; ENST00000494866; ENST00000526905; ENST00000529168; ENST00000530954; ENST00000534279; BC038227; OTTHUMT00000090691; OTTHUMT00000090692; OTTHUMT00000090693; OTTHUMT00000090694; OTTHUMT00000090695; OTTHUMT00000090696; OTTHUMT00000387579; OTTHUMT00000387580…	chr1	-	Multiple_Complex	10	1q21.3
		adenosine deaminase, RNA-specific, B1	TC2100007402.hg.1	ADARB1		7.64429	7.28591	7.64752	7.86334	7.29567	7.29419	0.862179	6.08679	7.47227	8.01525	6.66176	6.42726	6.65128	7.09889	7.97776	7.75496	7.40484	7.39925	8.82846	8.20691	8.66733	8.70633	8.06135	8.81581	8.76077	8.60685	7.29496	7.64584	0.328172	0.207849	T	T	-1.27534	0.864614	0.964345	3.01e-08	5.71e-08	T	NM_001112; NM_001160230; NM_015833; NM_015834; NR_027672; NR_027673; NR_027674; NR_073200; ENST00000348831; ENST00000360697; ENST00000389861; ENST00000389863; ENST00000437626; ENST00000449478; ENST00000460734; ENST00000462214; ENST00000464215; ENST00000481022; ENST00000492414; ENST00000496664; ENST00000611195; ENST00000629643; ENST00000631642; BC065545; OTTHUMT00000206645; OTTHUMT00000206646; OTT…	chr21	+	Multiple_Complex	10	21q22.3
		adenosine deaminase, RNA-specific, B2 (inactive)	TC1000009541.hg.1	ADARB2		3.5751	3.80218	3.43814	3.61085	3.50739	3.46129	0.53169	3.97689	5.14517	3.85779	3.52753	3.58561	3.27345	3.42894	4.24838	3.9329	3.99302	3.85761	3.50656	3.36296	3.22918	3.28045	3.322	3.31986	3.19602	3.28264	3.51658	3.59488	0.0765914	0.18387	T	T	-1.05577	0.627447	0.869234	8.38e-07	1.34e-06	T	NM_018702; ENST00000381305; ENST00000381310; ENST00000381312; ENST00000469464; ENST00000474762; ENST00000477140; ENST00000490172; BC137477; BC140852; OTTHUMT00000046426; OTTHUMT00000046427; OTTHUMT00000046428; OTTHUMT00000046429; OTTHUMT00000046430; OTTHUMT00000046431; OTTHUMT00000046432	chr10	-	Multiple_Complex	10	10p15.3
		adenosine deaminase, tRNA-specific 1	TC1600011569.hg.1	ADAT1		9.06543	8.52849	8.3135	7.73117	8.09203	8.07388	0.0567707	7.31382	6.2178	7.25706	8.23726	7.75892	8.09502	7.86329	9.7718	9.71336	10.134	10.196	6.91947	7.15089	7.76533	6.24727	8.81667	8.93527	8.81203	8.76401	8.08258	8.57048	0.203306	0.387282	T	T	-1.40239	0.0220849	0.186341	4.59e-10	1.13e-09	T	NM_012091; NR_036460; ENST00000307921; ENST00000562374; ENST00000564657; ENST00000565109; ENST00000566445; ENST00000566450; ENST00000567281; ENST00000568001; ENST00000568478; ENST00000568510; BC002758; OTTHUMT00000269027; OTTHUMT00000435498; OTTHUMT00000435499; OTTHUMT00000435500; OTTHUMT00000435501; OTTHUMT00000435503; OTTHUMT00000435504; OTTHUMT00000435505; OTTHUMT00000435506; OTTHUMT00000435507	chr16	-	Multiple_Complex	10	16q23.1
		adenosine deaminase, tRNA-specific 2	TC0600013425.hg.1	ADAT2		7.79786	6.78161	7.4079	7.25344	7.32513	6.91585	0.636481	5.59944	6.94208	7.27082	5.9737	5.9135	6.43826	6.18557	5.3515	5.23436	5.24729	6.25536	6.81443	6.06514	6.59259	6.77366	6.51264	6.65583	7.10141	7.01688	7.28535	7.35495	0.218562	0.512684	T	T	-1.04943	0.568159	0.836252	7.43e-06	1.07e-05	T	NM_001286259; NM_182503; ENST00000237283; ENST00000367593; ENST00000606514; OTTHUMT00000042517; OTTHUMT00000042518; OTTHUMT00000471399	chr6	-	Multiple_Complex	10	6q24.2
		aarF domain containing kinase 1	TC1400007769.hg.1	ADCK1		7.09494	6.80102	7.67869	6.98265	5.90515	6.38271	0.130489	10.8131	9.88904	9.2879	7.07062	7.31589	7.53057	7.03944	5.32736	5.72244	5.7519	5.81851	6.16509	6.70332	6.75829	6.76947	6.5459	6.80171	6.75223	6.66607	6.4136	7.14937	0.539907	0.44674	T	T	-1.66529	0.00619615	0.0958838	2.5e-12	9.28e-12	T	NM_001142545; NM_020421; ENST00000238561; ENST00000341211; ENST00000393639; ENST00000555217; ENST00000555333; ENST00000556048; ENST00000556560; ENST00000557501; BC058906; OTTHUMT00000413864; OTTHUMT00000413865; OTTHUMT00000413866; OTTHUMT00000413868; OTTHUMT00000413869; OTTHUMT00000413870; OTTHUMT00000413871; OTTHUMT00000413872; uc001xui.3	chr14	+	Multiple_Complex	10	14q24.3
		aarF domain containing kinase 2	TC0700013467.hg.1	ADCK2		5.78074	4.85294	6.3975	4.48508	4.59677	5.96106	0.36764	5.6375	6.83412	5.83195	5.77425	5.33239	5.26613	5.69235	4.37068	4.05701	4.22214	4.79758	5.68042	6.09712	5.69185	6.47943	5.39053	5.47113	5.84967	5.3157	4.5432	5.70833	0.821815	0.777482	T	T	-2.24253	0.0759466	0.34925	0.00049963	0.000603994	T	NM_052853; ENST00000072869; ENST00000473512; ENST00000476491; ENST00000483369; ENST00000498423; ENST00000622666; BC014107; OTTHUMT00000348734; OTTHUMT00000348735; OTTHUMT00000348737; OTTHUMT00000348738; OTTHUMT00000348739; uc003vvz.3	chr7	+	Multiple_Complex	10	7q34
		aarF domain containing kinase 3	TC0100011812.hg.1	ADCK3		8.92684	9.37029	9.04935	8.07115	9.21439	9.1476	0.482129	6.41635	7.18346	7.29769	7.7133	7.55043	7.85356	7.62364	6.12587	5.31531	6.27829	5.35479	10.1534	10.9091	11.4689	10.6175	6.9979	6.03445	6.22819	6.22039	9.17963	9.07225	0.641639	0.229005	T	T	1.07727	0.374992	0.717213	1.17e-12	4.62e-12	T	NM_020247; ENST00000366777; ENST00000366778; ENST00000366779; ENST00000476488; ENST00000478406; ENST00000479852; ENST00000485462; ENST00000485677; ENST00000489044; BC005171; BC129930; OTTHUMT00000091709; OTTHUMT00000091712; OTTHUMT00000091713; OTTHUMT00000091714; OTTHUMT00000091715; OTTHUMT00000091716; OTTHUMT00000091717; OTTHUMT00000091718; OTTHUMT00000098815	chr1	+	Multiple_Complex	10	1q42.13
		aarF domain containing kinase 4	TC1900010716.hg.1	ADCK4		6.4851	6.39494	6.44266	6.09754	6.8532	6.25649	0.876009	6.75501	3.53532	3.51503	6.14183	6.99333	6.14735	7.08875	6.98728	6.51162	6.44458	6.58731	5.37228	5.72582	6.04208	5.91483	6.44764	6.36568	5.95315	5.48055	6.24094	6.44128	0.398403	0.0451057	T	T	-1.14897	0.894088	0.97135	7.22e-08	1.31e-07	T	NM_001142555; NM_024876; ENST00000243583; ENST00000324464; ENST00000593544; ENST00000593723; ENST00000593724; ENST00000594084; ENST00000594490; ENST00000594720; ENST00000595254; ENST00000596357; ENST00000596455; ENST00000599643; ENST00000600080; ENST00000600707; ENST00000601304; ENST00000601451; ENST00000601967; BC013114; BC027473; OTTHUMT00000462731; OTTHUMT00000462732; OTTHUMT00000462733; OTTHU…	chr19	-	Multiple_Complex	10	19q13.2
		aarF domain containing kinase 5	TC0800009254.hg.1	ADCK5		8.05344	7.58384	7.36014	7.71724	7.6061	7.76955	0.886832	7.28132	7.26089	7.30758	7.46717	7.36402	7.95571	7.49744	7.38226	7.5589	7.87106	7.2892	8.29048	7.08066	7.25879	7.47804	7.19504	6.92294	7.05662	7.30339	7.70704	7.6271	0.0834708	0.353843	T	T	1.05697	0.902042	0.973531	0.348786	0.351788	T	NM_174922; ENST00000308860; ENST00000525136; ENST00000526231; ENST00000526833; ENST00000529654; ENST00000532190; ENST00000533715; ENST00000534714; BC101659; OTTHUMT00000382552; OTTHUMT00000382554; OTTHUMT00000382555; OTTHUMT00000382556; OTTHUMT00000382557; OTTHUMT00000382558; OTTHUMT00000382559; OTTHUMT00000467498	chr8	+	Multiple_Complex	10	8q24.3
		adenylate cyclase 1 (brain)	TC0700007426.hg.1	ADCY1		5.26419	4.81201	4.77627	5.76435	4.44771	4.44398	0.895209	5.57774	4.75797	6.47943	4.81145	4.65634	4.93123	3.41229	6.89937	5.92628	5.50765	6.11881	5.30077	6.225	6.00365	5.48824	4.1099	4.07104	4.36187	4.03245	4.44592	4.79487	0.761241	0.271971	T	T	-1.27363	0.867253	0.965323	7.27e-05	9.49e-05	T	NM_001281768; NM_021116; ENST00000297323; ENST00000432715; ENST00000468353; ENST00000621543; OTTHUMT00000340055; OTTHUMT00000340056; OTTHUMT00000340057; uc003tnd.3	chr7	+	Multiple_Complex	10	7p12.3
		adenylate cyclase 10 (soluble)	TC0100016316.hg.1	ADCY10		4.97893	4.85999	4.75461	4.73636	5.81153	4.74416	0.556075	6.73728	5.74793	5.79538	4.67104	5.01094	4.41621	5.22725	8.68141	8.49664	8.8596	9.0363	4.91259	4.95455	4.3156	5.20051	4.04457	4.10229	4.47621	4.0699	4.74042	4.86354	0.61851	0.112228	F	F	-1.08909	0.4002	0.735454	1.42e-13	6.91e-13	F	NM_001167749; NM_001297772; NM_018417; ENST00000367848; ENST00000367851; ENST00000476818; ENST00000485964; ENST00000545172; BC117366; BC117372; OTTHUMT00000083663; OTTHUMT00000083664; OTTHUMT00000097970; OTTHUMT00000097971; OTTHUMT00000471943; uc010plj.2	chr1	-	Multiple_Complex	10	1q24
		Transcript Identified by AceView, Entrez Gene ID(s) 108	TC0500006663.hg.1	ADCY2		3.73873	3.29	3.74917	3.80918	3.85888	3.49569	0.534129	4.33566	3.60815	3.66421	3.59434	3.13045	3.8204	3.58378	3.43778	3.69977	3.2475	3.3218	3.63435	4.08938	3.62095	3.80719	3.43634	3.38433	3.48759	3.77256	3.83302	3.74374	0.196915	0.26214	F	F	1.06384	0.535237	0.817975	0.139963	0.143153	F	ADCY2.lAug10-unspliced	chr5	+	Unassigned	6
		Transcript Identified by AceView, Entrez Gene ID(s) 108	TC0500006664.hg.1	ADCY2		7.50974	7.64124	7.42255	8.31552	8.02944	7.50237	0.160057	7.9737	8.40711	8.83663	7.60722	8.2043	7.3622	8.16284	7.76634	7.47213	7.34197	7.46527	8.007	7.5573	7.85918	7.39228	7.40972	7.63431	7.66685	7.78263	7.98072	7.52004	0.412484	0.110091	F	F	1.37618	0.085902	0.372436	0.0112734	0.0122737	F	ADCY2.jAug10-unspliced	chr5	+	Coding	6
		adenylate cyclase 2 (brain)	TC0500006665.hg.1	ADCY2		3.81478	3.96765	3.42325	5.68864	4.3137	4.04029	0.151968	5.0265	3.91917	6.35416	3.67002	4.0559	4.10276	3.77008	5.34969	5.54302	5.68121	6.29577	10.1633	10.0269	10.0308	10.3445	4.10267	4.14657	4.12643	3.70973	4.18257	3.78551	0.88339	0.280784	F	F	1.31682	0.00529148	0.0886495	5.95e-16	5.35e-15	F	NM_020546; ENST00000338316; ENST00000382531; ENST00000484965; ENST00000489501; ENST00000493243; ENST00000498598; ENST00000513693; ENST00000515681; ENST00000537121; BC111743; OTTHUMT00000206930; OTTHUMT00000313780; OTTHUMT00000313781; OTTHUMT00000313782; OTTHUMT00000313783; OTTHUMT00000313784; OTTHUMT00000366311; OTTHUMT00000366312	chr5	+	Multiple_Complex	10	5p15.3
		adenylate cyclase 3	TC0200011991.hg.1	ADCY3		5.47392	5.06573	4.75334	5.30054	5.23491	5.00978	0.729239	6.46645	5.61883	5.56695	4.9067	4.42474	4.43099	4.27485	4.86502	5.13223	4.9408	5.18561	5.8325	6.20289	5.86544	6.17661	7.00019	7.08387	7.24181	6.64258	5.2337	5.08955	0.152497	0.36135	T	T	1.10508	0.694347	0.901249	2.68e-10	6.86e-10	T	NM_004036; ENST00000260600; ENST00000405392; ENST00000427849; ENST00000433852; ENST00000435135; ENST00000438445; ENST00000450524; ENST00000454027; ENST00000455323; ENST00000479517; ENST00000485887; ENST00000498288; ENST00000606682; BC126235; BC144119; OTTHUMT00000211574; OTTHUMT00000324645; OTTHUMT00000324646; OTTHUMT00000324647; OTTHUMT00000324648; OTTHUMT00000324649; OTTHUMT00000324650; OTTHUMT…	chr2	-	Multiple_Complex	10	2p23.3
		adenylate cyclase 4	TC1400010726.hg.1	ADCY4		5.94891	5.33814	4.4242	5.70048	5.13493	5.75511	0.578518	5.68772	5.58684	6.24411	5.43278	4.9267	5.78843	5.49257	4.96324	5.2882	5.26183	4.82364	6.6086	5.92381	6.15709	5.50213	8.70658	7.70745	6.82155	7.78911	5.72668	5.26736	0.343379	0.767362	T	T	1.37489	0.454294	0.771867	3.84e-06	5.7e-06	T	NM_001198568; NM_001198592; NM_139247; ENST00000310677; ENST00000418030; ENST00000545213; ENST00000554068; ENST00000554577; ENST00000554674; ENST00000554781; ENST00000554936; ENST00000554959; ENST00000555684; ENST00000556932; ENST00000557056; ENST00000557099; ENST00000558125; ENST00000558563; ENST00000559167; ENST00000560635; ENST00000561138; ENST00000561200; BC117473; BC117475; OTTHUMT0000007320…	chr14	-	Multiple_Complex	10	14q12
		adenylate cyclase 5	TC0300012206.hg.1	ADCY5		5.75082	4.67491	4.57908	5.26565	5.38006	5.12138	0.543349	6.72873	6.39619	5.53553	6.18856	5.81819	6.29421	5.61237	5.93143	6.60196	6.09498	5.76407	4.63186	5.57782	5.71714	4.9499	6.25361	6.44571	6.84181	6.88353	5.25812	4.62895	0.129627	0.650608	T	T	1.54668	0.422417	0.75154	8.9e-05	0.00011527	T	NM_001199642; NM_183357; ENST00000309879; ENST00000462833; ENST00000466617; ENST00000468683; ENST00000470367; ENST00000474577; ENST00000476455; ENST00000478092; ENST00000483566; ENST00000491190; OTTHUMT00000355889; OTTHUMT00000355890; OTTHUMT00000355891; OTTHUMT00000355892; OTTHUMT00000356003; OTTHUMT00000356004; OTTHUMT00000356005; OTTHUMT00000356006; OTTHUMT00000356356; OTTHUMT00000356357	chr3	-	Multiple_Complex	10	3q21.1
		adenylate cyclase 6; microRNA 4701	TC1200010592.hg.1	ADCY6; MIR4701		8.55977	8.32491	8.76999	8.87993	8.83905	8.14852	0.805626	7.67504	9.73057	9.0581	7.88735	8.45899	7.31914	7.49005	6.45521	6.7283	6.50538	7.03606	6.01199	7.61593	7.15473	7.58056	6.73707	7.10709	7.3147	7.13999	8.85866	8.55331	0.410987	0.222654	T	T	1.23572	0.836394	0.954717	9.2e-07	1.46e-06	T	NM_015270; NR_039850; ENST00000307885; ENST00000357869; ENST00000547260; ENST00000548351; ENST00000548820; ENST00000550422; ENST00000551435; ENST00000552090; ENST00000552099; ENST00000583094; OTTHUMT00000408860; OTTHUMT00000408862; OTTHUMT00000408863; OTTHUMT00000408864; OTTHUMT00000408865; OTTHUMT00000408866; OTTHUMT00000408867; OTTHUMT00000408868	chr12	-	Multiple_Complex	10	12q13.12
		adenylate cyclase 7	TC1600007814.hg.1	ADCY7		3.68091	3.92313	4.49431	3.70731	4.21367	4.13483	0.963078	3.95406	4.67136	4.46292	3.71657	4.39371	3.90667	4.35474	3.2483	2.97821	3.28579	3.36202	3.87028	3.60505	3.99101	3.7116	6.09433	6.02747	5.32374	5.97928	4.17264	3.97148	0.272455	0.417639	T	T	1.14962	0.953891	0.98909	5.18e-09	1.08e-08	T	NM_001114; NM_001286057; ENST00000254235; ENST00000394697; ENST00000537579; ENST00000562623; ENST00000563677; ENST00000564044; ENST00000564965; ENST00000566433; ENST00000566761; ENST00000567277; ENST00000568731; ENST00000568930; ENST00000568933; ENST00000569265; ENST00000570187; BC126271; OTTHUMT00000256877; OTTHUMT00000423153; OTTHUMT00000423154; OTTHUMT00000423155; OTTHUMT00000423156; OTTHUMT00…	chr16	+	Multiple_Complex	10	16q12.1
		adenylate cyclase 8 (brain)	TC0800011844.hg.1	ADCY8		3.19595	2.73339	2.81986	2.71817	3.40994	2.73091	0.898335	3.52779	4.3859	3.71067	3.19702	2.94856	2.93935	3.38304	3.38743	3.45097	3.44463	3.56878	3.80087	3.27915	2.91916	3.23531	2.76292	3.19942	2.88559	2.82447	2.7248	2.7909	0.395767	0.245928	F	F	-1.04689	0.871741	0.966385	0.00168259	0.00194682	F	NM_001115; ENST00000286355; ENST00000377928; ENST00000522949; OTTHUMT00000380080; OTTHUMT00000380081; OTTHUMT00000380082	chr8	-	Multiple_Complex	10	8q24
		adenylate cyclase 9	TC1600009210.hg.1	ADCY9		7.38595	7.82753	7.80189	8.10041	7.60706	7.66871	0.59935	7.22904	8.47428	7.9219	9.09597	8.33588	8.9952	9.09807	6.64385	6.95107	6.23505	6.38334	10.4059	10.1586	11.03	10.0313	7.25534	7.47975	7.62966	7.30134	7.63914	7.81419	0.268812	0.247876	T	T	-1.129	0.645596	0.878551	4.27e-12	1.52e-11	T	NM_001116; ENST00000294016; ENST00000571467; ENST00000571889; ENST00000572288; ENST00000574721; ENST00000575550; ENST00000576936; BC136657; BC136658; BC151207; BC151229; OTTHUMT00000438075; OTTHUMT00000438076; OTTHUMT00000438077; OTTHUMT00000438078; OTTHUMT00000438079; OTTHUMT00000438080; OTTHUMT00000438081	chr16	-	Multiple_Complex	10	16p13.3
		adenylate cyclase activating polypeptide 1 (pituitary)	TC1800006461.hg.1	ADCYAP1		4.14203	3.93295	3.95549	3.75336	3.49034	4.15212	0.357177	5.09067	4.01039	4.21265	3.64616	3.83943	3.76734	3.97617	4.25828	4.06681	4.71531	4.91762	4.6796	4.82004	4.35315	4.16316	4.367	3.78312	3.83395	4.14841	3.78483	3.94468	0.333202	0.11476	F	F	-1.11717	0.377619	0.719412	0.00318743	0.00361179	F	NM_001099733; NM_001117; ENST00000269200; ENST00000450565; ENST00000579794; ENST00000581602; BC093837; BC101803; OTTHUMT00000440764; OTTHUMT00000440765; OTTHUMT00000440766; OTTHUMT00000440767	chr18	+	Multiple_Complex	10	18p11
		adenylate cyclase activating polypeptide 1 (pituitary) receptor type I	TC0700007105.hg.1	ADCYAP1R1		3.99113	3.74335	4.35667	11.0153	3.61229	3.90604	0.426185	5.11487	4.62334	4.32079	5.34303	3.75743	4.29898	4.06838	4.4567	5.44419	5.10903	5.45174	4.2368	4.31252	4.96584	4.41923	5.81339	5.25003	4.92067	5.59056	3.76516	4.01883	4.19189	0.308538	F	F	-1.19224	0.0585349	0.307108	0.638537	0.63973	F	NM_001118; NM_001199635; NM_001199636; NM_001199637; ENST00000304166; ENST00000396211; ENST00000409363; ENST00000409489; ENST00000431811; ENST00000436116; ENST00000614107; BC117116; BC136267; BC143679; OTTHUMT00000215041; OTTHUMT00000328078; OTTHUMT00000328079; OTTHUMT00000328080; OTTHUMT00000328081; OTTHUMT00000328082; uc003tcg.3	chr7	+	Multiple_Complex	10	7p14
		adducin 1 (alpha)	TC0400006579.hg.1	ADD1		11.3851	12.0805	11.0918	12.5732	12.2166	12.2419	0.058849	8.7221	10.4883	10.4384	11.4847	11.8574	11.5339	11.8378	11.7523	11.8669	11.7807	11.7484	12.4686	12.4653	12.5819	12.4289	12.6811	12.8249	12.7645	12.6233	12.2298	11.4436	0.198976	0.507814	T	T	1.72443	0.000431597	0.0242963	1.58e-11	5.02e-11	T	NM_001119; NM_001286645; NM_014189; NM_014190; NM_176801; ENST00000264758; ENST00000355842; ENST00000374281; ENST00000398123; ENST00000398125; ENST00000398129; ENST00000446856; ENST00000503062; ENST00000503169; ENST00000503455; ENST00000506157; ENST00000508277; ENST00000508684; ENST00000509039; ENST00000510101; ENST00000511797; ENST00000513328; ENST00000513762; ENST00000514940; ENST00000534870; E…	chr4	+	Multiple_Complex	10	4p16.3
		adducin 2 (beta)	TC0200013001.hg.1	ADD2		5.77352	5.50423	5.97613	7.19478	5.37048	5.27844	0.773613	8.46342	7.58021	6.08167	5.54751	6.02408	5.4519	5.82269	5.98808	6.26921	6.26419	6.5014	6.32409	7.10623	6.42051	6.02106	6.0383	6.44602	6.38543	5.71531	5.32634	5.75706	1.08081	0.236734	F	F	-1.34791	0.59061	0.850389	0.000447044	0.000542718	F	NM_001185054; NM_001185055; NM_001617; NM_017482; NM_017488; ENST00000264436; ENST00000355733; ENST00000403045; ENST00000407644; ENST00000413157; ENST00000415348; ENST00000425976; ENST00000430656; ENST00000447731; ENST00000456320; ENST00000473232; ENST00000481675; ENST00000496178; ENST00000522886; BC041666; BC065525; OTTHUMT00000251918; OTTHUMT00000251919; OTTHUMT00000330121; OTTHUMT00000330122; …	chr2	-	Multiple_Complex	10	2p13.3
		adducin 3 (gamma)	TC1000008875.hg.1	ADD3		8.11637	8.93956	7.97061	8.89824	8.72495	8.91341	0.17714	7.31684	5.79511	6.6648	6.27379	7.62961	7.11115	7.35247	11.1185	10.8445	10.3207	10.297	7.73707	7.89356	8.70918	7.75527	8.97068	9.4521	8.98308	9.0695	8.90552	8.04646	0.104704	0.522454	T	T	1.81385	0.131635	0.457294	1.26e-10	3.41e-10	T	NM_001121; NM_016824; NM_019903; ENST00000277900; ENST00000356080; ENST00000360162; ENST00000459738; ENST00000468251; ENST00000468345; ENST00000472568; ENST00000473669; ENST00000475954; ENST00000479805; ENST00000484622; ENST00000486014; ENST00000487085; ENST00000488104; ENST00000488799; ENST00000488837; ENST00000492162; ENST00000495661; ENST00000496517; ENST00000497125; ENST00000611329; BC062559;…	chr10	+	Multiple_Complex	10	10q25.2
		androglobin	TC0600009745.hg.1	ADGB		2.86545	2.70794	3.49631	3.00736	3.5326	2.5119	0.988282	3.63676	4.08658	4.08399	2.78623	3.62822	3.87944	3.6476	10.0908	10.0183	9.78874	10.081	3.08925	2.84485	2.77862	3.25425	2.73196	3.09421	2.68151	2.58018	3.01529	2.83419	0.510422	0.417197	F	F	1.13375	0.982821	0.995875	2.38e-18	4.96e-17	F	NM_024694; ENST00000326916; ENST00000326929; ENST00000367489; ENST00000367490; ENST00000397944; ENST00000470716; ENST00000473647; ENST00000480328; ENST00000493950; ENST00000522242; ENST00000522396; ENST00000523560; OTTHUMT00000042581; OTTHUMT00000042582; OTTHUMT00000042583; OTTHUMT00000042585; OTTHUMT00000042586; OTTHUMT00000042587; OTTHUMT00000323496; OTTHUMT00000376350; OTTHUMT00000376378; OTTH…	chr6	+	Multiple_Complex	10	6q24.3
		adhesion G protein-coupled receptor A1	TC1000009444.hg.1	ADGRA1		5.99423	6.23131	6.33626	7.26571	5.93057	6.26161	0.510495	5.38456	6.04849	5.64205	6.61332	6.86183	6.75237	6.65893	6.05112	5.82214	5.64338	5.66957	6.64955	6.3642	5.83601	6.26736	5.77132	6.13818	5.96628	6.04894	6.30298	6.21038	0.69527	0.175217	T	T	1.06629	0.252529	0.611395	0.00396972	0.00446123	T	NM_001083909; NM_001291085; ENST00000392606; ENST00000392607; ENST00000607359	chr10	+	Multiple_Complex	10	10q26
		adhesion G protein-coupled receptor A2	TC0800007311.hg.1	ADGRA2		6.72102	6.38162	7.18085	7.20602	6.05961	7.09279	0.956672	7.94727	8.72237	9.27241	7.81242	7.60764	7.0793	6.63901	6.73643	6.75806	6.53395	6.73058	7.12406	7.19989	6.94598	6.43641	9.10137	9.88774	9.15622	8.79223	7.1471	6.75051	0.631735	0.401124	T	T	1.31638	0.939784	0.985599	3.13e-08	5.93e-08	T	NM_032777; ENST00000315215; ENST00000412232; ENST00000428068; BC146774	chr8	+	Multiple_Complex	10	8p11.23
		adhesion G protein-coupled receptor A3	TC0400012907.hg.1	ADGRA3		8.32546	9.20106	9.40234	8.03121	8.98872	9.21096	0.659796	3.77171	5.45902	6.90166	9.9276	9.6174	9.55196	9.70006	6.9213	6.46255	6.80377	7.36873	7.46796	8.2467	8.62007	8.65623	5.72258	5.47437	5.31987	5.71086	9.05978	9.26857	0.626901	0.572547	T	T	-1.15572	0.482544	0.789297	1.05e-12	4.23e-12	T	NM_145290; ENST00000282943; ENST00000334304; ENST00000499527; ENST00000502482; ENST00000504617; ENST00000506133; ENST00000506155; ENST00000506346; ENST00000508133; ENST00000513385; ENST00000514129; ENST00000514749	chr4	-	Multiple_Complex	10	4p15.2
		adhesion G protein-coupled receptor B1	TC0800009143.hg.1	ADGRB1		5.66722	5.04006	5.07503	5.20668	4.77593	5.0856	0.378372	5.59042	6.41054	4.90247	4.64788	4.12462	5.72026	4.93482	4.89303	5.25763	5.0139	5.3455	5.07309	5.84667	4.55288	5.34655	4.64506	5.1929	5.60986	5.91136	5.06238	5.05826	0.222149	0.35243	T	T	1.00286	0.507113	0.802663	0.183513	0.18684	T	NM_001702; ENST00000323289; ENST00000517894; ENST00000518812; ENST00000518820; ENST00000521208	chr8	+	Multiple_Complex	10	8q24.3
		adhesion G protein-coupled receptor B2	TC0100013578.hg.1	ADGRB2		3.158	2.80229	2.81569	3.68436	2.94608	2.56959	0.704993	4.32277	2.78328	3.96037	3.17104	3.10812	3.50913	3.63528	3.3206	3.25798	3.03515	2.66688	3.0507	3.01299	4.00376	3.28477	3.53501	3.1858	2.8753	3.08399	3.01496	2.80926	0.567085	0.201612	F	F	1.15324	0.618784	0.864978	0.0321655	0.0340213	F	NM_001294335; NM_001294336; ENST00000373655; ENST00000373658; ENST00000398538; ENST00000398542; ENST00000398547; ENST00000398556; ENST00000420125; ENST00000436464; ENST00000465256; ENST00000466109; ENST00000468430; ENST00000527361; ENST00000530134; ENST00000530999; ENST00000533175; BC136533	chr1	-	Multiple_Complex	10	1p35
		adhesion G protein-coupled receptor B3	TC0600008447.hg.1	ADGRB3		3.6323	4.23657	3.7899	8.91096	5.40749	3.81104	0.22813	6.72714	5.57716	4.3347	5.80092	5.38356	4.01967	3.92299	6.12637	6.70416	7.1303	6.80761	4.59048	4.47008	3.80284	4.46479	5.71644	5.64025	5.75605	5.66409	5.72318	3.81532	2.60871	0.313447	T	T	3.75253	0.00755313	0.107942	0.00693377	0.00766377	T	NM_001704; ENST00000238918; ENST00000370598; ENST00000546190; ENST00000603207; ENST00000604969; BC111720	chr6	+	Multiple_Complex	10	6q12
		adhesion G protein-coupled receptor D1	TC1200009420.hg.1	ADGRD1		5.70951	4.8256	5.80289	5.76349	5.43406	5.71897	0.588197	7.25547	7.57415	6.87678	9.15899	8.37785	8.89154	8.79466	7.496	7.82026	7.92161	7.47101	6.28046	5.96665	6.37599	6.36202	6.56667	6.22502	6.46589	5.58659	5.74032	5.7543	0.178736	0.539307	T	T	-1.00973	0.477845	0.787281	3.64e-11	1.08e-10	T	NM_198827; ENST00000261654; ENST00000335486; ENST00000376682; ENST00000446583; ENST00000535015; ENST00000536988; ENST00000537489; ENST00000537600; ENST00000540207; ENST00000541143; ENST00000541937; ENST00000542091; ENST00000543617; ENST00000543826; ENST00000544673; ENST00000545900; BC112307; BC112309; BC143775	chr12	+	Multiple_Complex	10	12q24.33
		adhesion G protein-coupled receptor E1	TC1900006827.hg.1	ADGRE1		5.60663	4.68259	5.47468	4.83459	5.40469	5.31518	0.84668	7.91372	6.94327	6.30044	6.6335	7.09024	6.33829	6.82599	4.91156	4.66905	4.34966	5.06201	4.81964	4.77543	4.65245	4.52881	11.4581	11.3822	11.8757	11.936	5.35811	5.53796	0.306592	0.499778	T	T	-1.13277	0.78558	0.934961	1.36e-18	3.12e-17	T	NM_001256252; NM_001256253; NM_001256254; NM_001256255; NM_001974; ENST00000250572; ENST00000312053; ENST00000381404; ENST00000381407; ENST00000450315; ENST00000595026; ENST00000596944; ENST00000601198; BC059395	chr19	+	Multiple_Complex	10	19p13.3
		adhesion G protein-coupled receptor E2	TC1900009838.hg.1	ADGRE2		4.39119	4.65441	4.40968	4.7962	4.54681	4.74391	0.138086	4.23623	4.63807	3.28156	5.87215	6.30258	6.75424	6.18013	3.57526	3.9032	3.79071	4.15032	5.05254	5.37531	4.73277	5.65713	12.2009	12.2381	12.347	12.2358	4.74931	4.40081	0.131515	0.146924	F	F	1.27324	0.363329	0.709328	2.89e-21	2e-19	F	NM_001271052; NM_013447; ENST00000315576; ENST00000360222; ENST00000392962; ENST00000392965; ENST00000594076; ENST00000594294; ENST00000595208; ENST00000595839; ENST00000596991; ENST00000598500; ENST00000599423; ENST00000601345; ENST00000601619; BC127004; BC127005	chr19	-	Multiple_Complex	10	19p13.1
		adhesion G protein-coupled receptor E3	TC1900009832.hg.1	ADGRE3		4.66603	4.86618	4.97438	4.15041	5.43534	4.29085	0.640888	6.06147	6.48281	5.08334	5.58912	5.23061	5.2389	5.88406	4.12299	4.40284	4.37388	3.93643	4.84247	5.63527	4.89483	5.1593	5.41037	5.10726	6.20386	5.3725	4.22349	4.84765	0.70482	0.156443	F	F	-1.54131	0.499466	0.798436	9.18e-05	0.000118695	F	NM_001289158; NM_001289159; NM_032571; ENST00000253673; ENST00000344373; ENST00000443157; ENST00000595472; ENST00000599900	chr19	-	Coding	10	19p13.1
		adhesion G protein-coupled receptor E5	TC1900007173.hg.1	ADGRE5		8.80853	9.00487	9.397	8.40698	8.54972	8.55203	0.0341895	6.28727	6.30449	6.86253	10.1098	10.2418	9.71138	9.83484	6.619	6.07446	6.17216	5.78582	10.7403	10.6219	11.3163	11.1303	14.453	13.8269	13.8152	14.1438	8.55083	9.04142	0.0830859	0.299615	T	T	-1.40502	0.0263804	0.204632	6.62e-20	2.61e-18	T	NM_001025160; NM_001784; NM_078481; ENST00000242786; ENST00000357355; ENST00000358600; ENST00000586517; ENST00000586849; ENST00000587319; ENST00000587535; ENST00000587606; ENST00000587728; ENST00000590567; ENST00000591080; ENST00000591565; ENST00000591737; ENST00000592261; ENST00000592341; ENST00000593028; BC026690	chr19	+	Multiple_Complex	10	19p13.12
		adhesion G protein-coupled receptor F1	TC0600011957.hg.1	ADGRF1		6.02346	5.34637	4.35715	5.52496	4.62144	4.84385	0.680985	5.74276	7.64395	4.60838	5.60584	5.32332	5.30594	5.36867	5.3111	5.08073	4.61362	5.0679	4.41888	5.12081	4.85743	5.13282	4.4189	4.88369	4.98215	5.92902	4.87024	5.27258	0.470766	0.838013	T	T	-1.32165	0.499475	0.798436	0.00137431	0.00160188	T	NM_025048; NM_153840; ENST00000283297; ENST00000371243; ENST00000371253; ENST00000419892; ENST00000449332; ENST00000471487; ENST00000474800; ENST00000475745; ENST00000477771; ENST00000477858; ENST00000487323; ENST00000491283; ENST00000493249	chr6	-	Multiple_Complex	10	6p12.3
		adhesion G protein-coupled receptor F2	TC0600014135.hg.1	ADGRF2		3.93226	2.62497	3.63304	2.75616	3.04993	2.83362	0.271051	4.7761	4.59175	4.856	3.40655	3.91965	3.40014	4.09668	2.87762	3.18126	3.16204	2.99315	4.24736	3.41551	4.19773	3.16385	4.14789	3.39584	3.40551	3.42351	2.84659	3.62186	0.152256	0.684926	F	F	-1.71151	0.115047	0.429311	0.000450674	0.000546878	F	NM_153839; ENST00000296862; ENST00000398742; ENST00000467205; ENST00000507065	chr6	+	Coding	10	6p12.3
		adhesion G protein-coupled receptor F3	TC0200012035.hg.1	ADGRF3		3.95233	4.87869	4.08984	4.32112	4.5962	4.4331	0.6575	4.90406	5.26759	4.42902	4.27212	3.91049	4.97696	4.77964	4.15884	4.53513	4.19743	4.7516	4.74395	4.50938	4.71218	4.61673	4.06685	4.9206	4.71468	4.48748	4.4452	4.02389	0.138329	0.499889	T	F	1.33915	0.605424	0.858408	0.401842	0.404463	F	NM_001145168; NM_001145169; NM_153835; ENST00000311519; ENST00000333478; ENST00000421160; ENST00000433584; ENST00000435303; ENST00000447444; ENST00000459892; ENST00000481960; ENST00000487878	chr2	-	Multiple_Complex	10	2p23.3
		adhesion G protein-coupled receptor F4	TC0600014136.hg.1	ADGRF4		3.49932	3.8018	3.56116	3.88165	3.53325	3.79163	0.456471	5.88656	4.7392	4.46924	3.89681	3.56032	4.84802	3.51534	3.58617	3.44865	2.94902	4.08401	4.84866	4.69341	3.74517	4.15085	3.88923	3.57171	3.60935	3.76414	3.77762	3.55177	0.180853	0.159805	T	T	1.16946	0.719751	0.910147	0.000563923	0.000678162	T	NM_153838; ENST00000283303; ENST00000327753	chr6	+	Coding	10	6p12.3
		adhesion G protein-coupled receptor F5	TC0600011956.hg.1	ADGRF5		9.78466	9.54402	9.1583	10.0841	9.75172	9.7494	0.161761	8.72882	8.93208	10.6937	8.99843	9.33349	9.49968	9.32861	6.13443	6.11379	6.18978	6.38636	9.75053	9.96112	9.81457	9.86308	12.4955	12.155	12.0577	12.4685	9.75061	9.51147	0.192602	0.315968	T	T	1.18029	0.0661313	0.327043	1.92e-18	4.15e-17	T	NM_001098518; NM_015234; ENST00000265417; ENST00000283296; ENST00000478711; ENST00000498632; BC066121	chr6	-	Multiple_Complex	10	6p12.3
		adhesion G protein-coupled receptor G1	TC1600008005.hg.1	ADGRG1		5.01239	5.99915	5.06679	5.8614	6.11154	6.13222	0.111467	6.34553	6.48163	8.95196	4.23132	4.32011	5.21884	3.99094	11.6858	11.5175	11.121	11.3906	5.97079	5.95541	6.73492	6.02309	5.62159	5.95343	5.52173	5.74962	6.12146	5.0407	0.150743	0.554669	T	T	2.11515	0.0291101	0.21658	9.99e-17	1.16e-15	T	NM_001145770; NM_001145771; NM_001145772; NM_001145773; NM_001145774; NM_001290142; NM_001290143; NM_001290144; NM_005682; NM_201524; NM_201525; ENST00000388813; ENST00000456916; ENST00000540164; ENST00000561696; ENST00000561782; ENST00000561833; ENST00000561872; ENST00000561969; ENST00000561988; ENST00000562003; ENST00000562101; ENST00000562414; ENST00000562467; ENST00000562558; ENST00000562608;…	chr16	+	Multiple_Complex	10	16q21
		adhesion G protein-coupled receptor G2	TC0X00009199.hg.1	ADGRG2		5.79208	6.49933	6.30036	6.27129	6.06655	5.40428	0.446551	6.1984	7.77727	8.03522	6.96834	5.88011	6.42489	6.30426	10.2801	10.3907	10.5925	10.7465	6.09836	5.5464	5.07688	5.39729	5.99666	6.83235	6.33733	7.00142	6.05093	6.26218	0.453179	0.364724	T	T	-1.15769	0.367417	0.712727	3e-13	1.35e-12	T	NM_001079858; NM_001079859; NM_001079860; NM_001184833; NM_001184834; NM_001184835; NM_001184836; NM_001184837; NM_005756; ENST00000340581; ENST00000354791; ENST00000356606; ENST00000357544; ENST00000357991; ENST00000360279; ENST00000379869; ENST00000379873; ENST00000379876; ENST00000379878; ENST00000479496; BC099901; BC113978; BC113979	chrX	-	Multiple_Complex	10	Xp22.13
		adhesion G protein-coupled receptor G3	TC1600008007.hg.1	ADGRG3		5.16189	5.35821	5.87067	5.10367	5.29912	6.12625	0.908827	5.21224	5.87062	6.14928	6.57208	5.95303	6.24048	6.65542	5.36322	5.50854	5.59808	5.43755	6.50616	6.01948	6.04346	6.09404	8.0535	7.296	7.27887	8.06639	5.24242	5.39505	0.542834	0.365952	F	T	-1.1116	0.868495	0.965672	1.17e-07	2.06e-07	F	NM_001308360; NM_170776; ENST00000333493; ENST00000450388; ENST00000565579; ENST00000565902; ENST00000567991; ENST00000568245; ENST00000569977; BC064508	chr16	+	Multiple_Complex	10	16q21
		adhesion G protein-coupled receptor G4	TC0X00008528.hg.1	ADGRG4		3.83565	4.25182	4.30723	4.04938	4.02231	4.29205	0.954971	5.60893	4.80559	4.39898	4.55064	4.3751	4.3944	4.3223	3.44058	3.42213	3.64922	4.26253	5.04748	4.89149	4.51234	4.51161	4.17076	4.46981	4.13848	3.69232	4.0364	4.2784	0.148538	0.257765	F	F	-1.18263	0.964691	0.992407	0.000103528	0.000133161	F	NM_153834; ENST00000370652; ENST00000394141; ENST00000394143	chrX	+	Coding	10	Xq26.3
		adhesion G protein-coupled receptor G5	TC1600008003.hg.1	ADGRG5		5.74861	7.18164	6.74387	6.98492	6.49317	6.63147	0.762462	6.15199	6.78396	6.77803	7.27241	6.64187	6.90573	7.14561	6.71821	6.49011	6.77603	6.00727	6.6477	6.44129	6.17503	6.86083	7.7076	7.98034	8.38738	8.70158	6.658	6.65651	0.253598	0.734366	T	T	1.00104	0.644471	0.877951	5.86e-05	7.71e-05	T	NM_001304376; NM_153837; ENST00000340339; ENST00000349457; ENST00000394361; ENST00000564607; ENST00000564983; ENST00000569839; ENST00000615867; BC032401	chr16	+	Multiple_Complex	10	16q21
		adhesion G protein-coupled receptor G6	TC0600009669.hg.1	ADGRG6		5.24771	6.43148	5.76073	7.1061	6.29856	6.70069	0.0987005	8.1929	8.23677	8.0839	11.6015	11.0758	11.5075	11.1309	5.35304	5.28809	5.64603	5.87948	5.3668	6.14186	5.82542	5.71827	8.24531	8.40747	7.95888	8.20021	6.70157	5.79993	0.403771	0.593634	T	T	1.86819	0.00337801	0.0713933	3.17e-16	3.09e-15	T	NM_001032394; NM_001032395; NM_020455; NM_198569; ENST00000230173; ENST00000296932; ENST00000367608; ENST00000367609; ENST00000415128; ENST00000435011; ENST00000463637; ENST00000472054; ENST00000497898; ENST00000508295; ENST00000538281; ENST00000540208; ENST00000541199; ENST00000545477; BC075798	chr6	+	Multiple_Complex	10	6q24.1
		adhesion G protein-coupled receptor G7	TC0300008150.hg.1	ADGRG7		3.37217	4.13865	3.89442	3.28332	3.69131	3.62344	0.357405	4.87936	4.98023	4.43468	9.01462	8.68199	9.29724	9.28562	3.22098	3.36142	3.5458	3.01197	4.18447	4.80137	3.96096	4.27692	3.86058	3.6928	3.86087	3.89257	3.65599	3.84668	0.218611	0.391553	F	F	-1.14131	0.257062	0.616427	1.79e-17	2.7e-16	F	NM_001308362; NM_032787; ENST00000273352; ENST00000475887; ENST00000481361; ENST00000481506; ENST00000493081; BC113451; BC130388	chr3	+	Multiple_Complex	10	3q12.2
		adhesion G protein-coupled receptor L1	TC1900009808.hg.1	ADGRL1		6.79475	6.78006	6.92887	7.21656	6.5925	6.84783	0.79853	6.36939	5.86188	6.85298	5.4807	5.33331	5.08094	5.80461	6.01951	6.62746	6.25498	6.12911	5.49399	5.13	5.1536	5.44186	6.48819	6.1367	6.39289	5.80587	6.87479	6.7877	0.313742	0.0820046	T	T	1.06223	0.820782	0.94897	3.36e-07	5.6e-07	T	NM_001008701; NM_014921; ENST00000340736; ENST00000361434; ENST00000588677; ENST00000589616; ENST00000590223; ENST00000591528; ENST00000592164; ENST00000593005	chr19	-	Multiple_Complex	10	19p13.2
		adhesion G protein-coupled receptor L2	TC0100008845.hg.1	ADGRL2		10.0733	10.6692	9.97552	10.9247	10.3846	10.3833	0.313321	8.80337	8.607	10.4918	10.4338	10.5333	10.3163	10.3942	6.47273	6.10798	6.74596	6.67611	6.32151	7.30451	7.18906	7.30469	11.0613	11.1015	10.8407	11.2938	10.384	10.0264	0.31222	0.37544	T	T	1.28128	0.20882	0.564078	7.58e-16	6.63e-15	T	NM_001297704; NM_001297705; NM_001297706; NM_012302; ENST00000319517; ENST00000359929; ENST00000370713; ENST00000370715; ENST00000370717; ENST00000370721; ENST00000370723; ENST00000370725; ENST00000370727; ENST00000370728; ENST00000370730; ENST00000402328; ENST00000449420; ENST00000464551; ENST00000464775; ENST00000468283; ENST00000469377; ENST00000472424; ENST00000473719; ENST00000492666; ENST00…	chr1	+	Multiple_Complex	10	1p31.1
		adhesion G protein-coupled receptor L3	TC0400012797.hg.1	ADGRL3		7.30422	7.5355	7.35817	7.30293	7.40897	7.19635	0.357806	6.66725	7.29687	6.75378	5.03623	5.26727	5.19342	4.78612	5.20159	5.36708	5.17132	5.22505	5.05741	5.70826	5.22868	5.28602	4.63401	4.43375	4.39376	4.57878	7.30278	7.36152	0.10631	0.121001	T	T	-1.04155	0.592446	0.851758	1.92e-14	1.14e-13	T	ENST00000509779	chr4	+	NonCoding	10	4q13.1
		adhesion G protein-coupled receptor L3	TC0400012798.hg.1	ADGRL3		10.829	11.3839	10.9827	11.7073	11.4959	11.8374	0.0333388	7.27672	7.19453	6.95095	4.4084	4.83716	5.07802	4.43562	7.44456	7.5288	7.7974	7.64096	6.74978	7.17519	6.56492	6.62857	4.71452	4.43854	4.43996	4.15804	11.6892	11.0116	0.172348	0.286496	T	T	1.59955	0.00946324	0.12107	1.22e-20	6.39e-19	T	NM_015236; ENST00000502815; ENST00000504896; ENST00000506700; ENST00000506720; ENST00000506746; ENST00000507164; ENST00000507625; ENST00000508078; ENST00000508693; ENST00000508946; ENST00000509089; ENST00000509896; ENST00000511324; ENST00000514157; ENST00000514996; ENST00000545650	chr4	+	Multiple_Complex	10	4q13.1
		adhesion G protein-coupled receptor L4	TC0100014685.hg.1	ADGRL4		9.08119	8.05711	8.3289	9.39135	8.48949	8.69783	0.417323	7.46702	8.57899	8.04428	9.12586	9.40263	9.63055	9.29769	8.13056	8.06626	8.4202	8.46321	11.5251	11.08	10.8598	11.096	13.9378	13.585	13.7138	13.6237	8.70815	8.37527	0.472181	0.530495	T	T	1.25953	0.157824	0.498485	1.08e-16	1.24e-15	T	NM_022159; ENST00000370742; ENST00000401034; BC025721	chr1	-	Coding	10	1p33-p32
		adhesion G protein-coupled receptor V1	TC0500008055.hg.1	ADGRV1		3.7991	3.2074	3.95663	4.40622	3.47951	3.11856	0.976942	4.44716	4.10508	3.75457	3.65948	3.81482	3.21385	3.74165	5.33328	4.57756	4.15743	4.35314	5.26351	4.08781	4.05941	3.27299	3.59288	3.37675	3.91832	3.45402	3.54844	3.81463	0.664222	0.395025	F	F	-1.20263	0.971951	0.994033	0.0830553	0.0858906	F	NM_032119; NR_003149; ENST00000405460; ENST00000425867; ENST00000450321; ENST00000503852; ENST00000504142; ENST00000505845; ENST00000507314; ENST00000508842; ENST00000509621; ENST00000512205; ENST00000513828	chr5	+	Multiple_Complex	10	5q13
		alcohol dehydrogenase 1A (class I), alpha polypeptide	TC0400011407.hg.1	ADH1A		3.74415	3.51443	4.04379	3.75605	3.10479	3.87872	0.546186	5.60419	3.22235	4.24272	13.2227	13.2708	13.3228	13.3036	3.16757	3.30141	3.26598	3.20347	5.98273	5.82401	5.27928	6.4177	3.58788	3.28158	3.75486	3.08572	3.81488	3.76155	0.415964	0.265448	F	F	1.03766	0.452895	0.771277	1.63e-22	2.1e-20	F	NM_000667; ENST00000209668; ENST00000503461; ENST00000511656; BC074738; BC117442; BC126306; OTTHUMT00000253669; OTTHUMT00000364679; OTTHUMT00000364852	chr4	-	Multiple_Complex	10	4q23
		alcohol dehydrogenase 1B (class I), beta polypeptide	TC0400011408.hg.1	ADH1B		11.0316	11.9944	9.82001	13.0965	12.7337	12.6273	0.0440996	12.1111	12.7812	13.3205	16.6354	16.8012	16.4295	16.6333	7.02259	7.47906	7.68501	7.73274	12.8332	12.7317	12.835	12.7472	8.28963	8.23641	8.8422	8.4848	12.7364	10.9688	0.246013	1.08958	T	T	3.4048	1.12e-05	0.00321237	4.04e-18	7.72e-17	T	NM_000668; NM_001286650; ENST00000305046; ENST00000504498; ENST00000506651; ENST00000515694; ENST00000625860; ENST00000632775; BC033009; OTTHUMT00000364853; OTTHUMT00000364854; OTTHUMT00000364856; OTTHUMT00000364858; OTTHUMT00000487270	chr4	-	Multiple_Complex	10	4q23
		alcohol dehydrogenase 1C (class I), gamma polypeptide	TC0400011409.hg.1	ADH1C		4.95203	4.62793	3.96415	4.76039	4.90426	4.9484	0.295371	5.4905	6.13938	4.81933	11.6099	11.363	11.4048	11.663	4.03387	3.81606	3.40769	3.72228	7.93659	7.47764	7.62773	7.49177	3.68451	3.20803	3.99523	3.39384	4.90117	4.56632	0.0983148	0.503579	T	T	1.26124	0.145482	0.479189	1.54e-20	7.68e-19	T	NM_000669; ENST00000505942; ENST00000510055; ENST00000511397; ENST00000515683; BC062476; BC066227; BC066228; BC067419; BC067420; BC067421; BC067422; BC074771; BC074786; OTTHUMT00000364877; OTTHUMT00000365187; OTTHUMT00000365188; OTTHUMT00000365189	chr4	-	Multiple_Complex	10	4q23
		alcohol dehydrogenase 4 (class II), pi polypeptide	TC0400011403.hg.1	ADH4		3.04557	3.71778	3.38199	3.10097	3.50505	2.84201	0.443485	4.79508	4.78785	5.18825	12.1139	11.863	12.1028	12.3923	3.2247	3.21516	3.25144	3.02101	3.1677	3.69434	4.6138	3.67234	3.43133	3.35725	3.54447	2.84593	3.13406	3.38182	0.334156	0.336105	F	F	-1.18736	0.411317	0.742517	2.2e-20	1.02e-18	F	NM_000670; NM_001306171; NM_001306172; ENST00000265512; ENST00000503416; ENST00000503944; ENST00000504125; ENST00000504581; ENST00000504894; ENST00000505590; ENST00000506705; ENST00000508393; ENST00000509471; ENST00000512499; ENST00000629236; BC022319; OTTHUMT00000364220; OTTHUMT00000364221; OTTHUMT00000364501; OTTHUMT00000364502; OTTHUMT00000364503; OTTHUMT00000364504; OTTHUMT00000364505; OTTHUM…	chr4	-	Multiple_Complex	10	4q22
		alcohol dehydrogenase 5 (class III), chi polypeptide	TC0400011402.hg.1	ADH5		10.1554	10.1117	9.79082	9.9036	9.67504	10.1336	0.546931	6.22985	6.02733	6.66872	11.3273	11.3387	11.3013	11.4705	9.45928	9.47703	9.86356	9.57803	9.52471	9.82639	9.8802	9.7576	10.265	10.0135	9.86324	10.2486	9.904	10.1327	0.229305	0.199096	T	T	-1.17177	0.526141	0.812818	1.42e-16	1.56e-15	T	NM_000671; ENST00000296412; ENST00000502386; ENST00000502590; ENST00000503130; ENST00000505652; ENST00000507102; ENST00000508146; ENST00000508511; ENST00000512604; ENST00000512621; ENST00000512659; ENST00000512991; ENST00000626055; BC014665; BC070491; OTTHUMT00000364224; OTTHUMT00000364225; OTTHUMT00000364226; OTTHUMT00000364227; OTTHUMT00000364228; OTTHUMT00000364229; OTTHUMT00000364230; OTTHUMT…	chr4	-	Multiple_Complex	10	4q23
		alcohol dehydrogenase 6 (class V)	TC0400011405.hg.1	ADH6		3.40453	4.36523	3.89524	3.86708	3.60603	3.68676	0.590035	4.60954	4.79827	5.13824	12.3381	12.147	12.3545	12.408	3.58785	3.33034	3.43407	4.23433	4.19567	4.3255	4.32843	4.29194	4.20039	3.54813	4.22043	3.77611	3.70282	3.8897	0.133654	0.480387	T	T	-1.1383	0.492498	0.794666	2.31e-21	1.68e-19	T	NM_000672; NM_001102470; ENST00000237653; ENST00000394897; ENST00000394899; ENST00000504257; ENST00000507484; ENST00000508558; ENST00000512708; ENST00000513262; BC039065; OTTHUMT00000253663; OTTHUMT00000253664; OTTHUMT00000253665; OTTHUMT00000364510; OTTHUMT00000364670; OTTHUMT00000364671; OTTHUMT00000364672; OTTHUMT00000364673	chr4	-	Multiple_Complex	10	4q23
		alcohol dehydrogenase 7 (class IV), mu or sigma polypeptide	TC0400011411.hg.1	ADH7		5.15638	5.32367	4.14211	5.04526	5.79383	5.16348	0.350959	6.6097	5.1951	5.50355	5.83554	5.86091	5.55751	5.26001	4.75898	4.13715	3.97683	4.70686	7.14989	6.02586	7.30233	6.96269	4.70957	5.33278	5.77931	4.0124	5.10678	5.23661	0.402425	0.639377	T	T	-1.09417	0.255015	0.614006	2.83e-05	3.85e-05	T	NM_000673; NM_001166504; ENST00000209665; ENST00000437033; ENST00000474027; ENST00000476959; ENST00000482593; ENST00000485660; BC131512; OTTHUMT00000354562; OTTHUMT00000354563; OTTHUMT00000354564; OTTHUMT00000354565; OTTHUMT00000354566; uc003huv.2	chr4	-	Multiple_Complex	10	4q23-q24
		alcohol dehydrogenase, iron containing 1; chromosome 8 open reading frame 46	TC0800012308.hg.1	ADHFE1; C8orf46		8.46468	7.5072	7.50475	7.80955	7.72146	7.61803	0.753276	7.75191	9.23637	8.31824	7.86	7.88862	8.20603	7.8609	5.72293	5.98149	5.61892	5.73824	7.69559	7.87842	7.60456	7.30943	6.75518	6.79678	6.69761	6.48524	7.7175	7.50602	0.0958622	0.55351	T	T	1.15787	0.621633	0.86619	1.05e-10	2.87e-10	T	NM_144650; ENST00000276576; ENST00000396621; ENST00000396623; ENST00000415254; ENST00000419955; ENST00000422166; ENST00000424777; ENST00000426810; ENST00000431959; ENST00000443372; ENST00000449512; ENST00000463261; ENST00000466739; ENST00000466920; ENST00000480040; ENST00000490228; ENST00000496501; ENST00000498712; ENST00000518781; BC064634; OTTHUMT00000316867; OTTHUMT00000316868; OTTHUMT00000316…	chr8	+	Multiple_Complex	10	8q13.1
		acireductone dioxygenase 1	TC0200011551.hg.1	ADI1		11.9605	11.6587	12.2014	11.6854	12.0237	11.9396	0.774729	7.86984	9.38516	10.3121	13.2209	13.3419	13.2018	13.4207	8.18742	8.01916	7.77977	8.01457	10.4937	10.6717	11.1644	10.9237	11.8935	11.9121	11.8556	12.0916	11.9289	11.9451	0.176107	0.271928	T	T	-1.0113	0.764706	0.926521	1.68e-18	3.73e-17	T	NM_001306077; ENST00000327435; ENST00000382093; ENST00000415131; BC001467; OTTHUMT00000231914; OTTHUMT00000322789; OTTHUMT00000322790	chr2	-	Multiple_Complex	10	2p25.3
		adipogenin	TC2000007325.hg.1	ADIG		3.88206	4.71722	4.52547	3.98648	4.06905	4.67016	0.709131	5.22922	5.17803	4.03059	3.84939	3.8332	4.53081	4.19074	7.86091	7.62277	7.51129	8.10634	5.3573	4.35116	4.00538	4.99386	3.93294	3.92894	4.40081	4.18819	4.02945	4.5175	0.373178	0.437462	T	T	-1.40255	0.663998	0.887704	3.41e-11	1.02e-10	T	NM_001018082; NR_130907; ENST00000373348; ENST00000416116; ENST00000470147; ENST00000537425; BC029594; BC119704; BC119705; OTTHUMT00000079196; OTTHUMT00000079197; OTTHUMT00000079198; uc002xjb.1	chr20	+	Multiple_Complex	10	20q11.23
		adiponectin, C1Q and collagen domain containing	TC0300009787.hg.1	ADIPOQ		3.24288	3.4221	3.32188	3.66211	3.10833	2.88064	0.662351	3.18449	3.5934	2.73441	3.01765	3.04273	3.20915	3.34787	3.93534	3.85116	4.05419	4.01964	4.30906	4.69264	4.41356	4.9202	3.02257	3.27585	3.58341	3.49579	3.15341	3.32722	0.401914	0.0898191	F	F	-1.12803	0.593875	0.852456	5.73e-07	9.28e-07	F	NM_001177800; NM_004797; ENST00000320741; ENST00000444204; BC054496; BC096308; BC096309; BC096310; BC096311; OTTHUMT00000344489; OTTHUMT00000344490	chr3	+	Coding	10	3q27
		adiponectin receptor 1	TC0100016971.hg.1	ADIPOR1		10.9037	11.6597	11.3852	11.4332	11.0976	11.7071	0.750107	9.95387	9.70516	9.8159	12.5973	12.4817	12.4926	12.4786	11.9216	11.911	12.0601	11.9656	11.4793	11.7593	11.9266	11.7185	13.8734	13.864	13.9432	13.8709	11.4175	11.3416	0.305273	0.38273	T	T	1.054	0.61375	0.861863	2.48e-14	1.43e-13	T	NM_001290553; NM_001290557; NM_001290629; NM_015999; ENST00000340990; ENST00000367254; ENST00000417068; ENST00000426229; ENST00000495562; BC001594; BC010743; OTTHUMT00000099160; OTTHUMT00000099161; OTTHUMT00000099162; OTTHUMT00000100122	chr1	-	Multiple_Complex	10	1q32.1
		adiponectin receptor 2	TC1200006472.hg.1	ADIPOR2		11.1737	11.8496	10.7584	11.5635	11.8011	11.8609	0.219273	10.2686	9.86664	10.6844	12.3571	12.2501	12.3981	12.3916	9.37137	9.22933	9.34224	9.20054	9.07934	9.1932	9.62692	9.00196	8.11331	8.84096	8.56023	8.14767	11.8122	11.2316	0.157316	0.55075	T	T	1.49554	0.0537696	0.294818	3.41e-14	1.9e-13	T	NM_024551; ENST00000357103; ENST00000535774; ENST00000537190; ENST00000537545; ENST00000540974; ENST00000543456; ENST00000544470; BC051858; OTTHUMT00000252447; OTTHUMT00000397946; OTTHUMT00000397948; OTTHUMT00000397949; OTTHUMT00000397950; OTTHUMT00000397951; OTTHUMT00000397952	chr12	+	Multiple_Complex	10	12p13.31
		adipogenesis regulatory factor; ankyrin repeat and GTPase domain Arf GTPase activating protein 11; BMS1 ribosome biogenesis factor pseudogene 3	TC1000012471.hg.1	ADIRF; AGAP11; BMS1P3		5.70177	6.21495	5.22535	6.30267	6.79092	6.92793	0.0488984	5.56717	7.83474	6.18475	6.2173	5.94592	5.48941	5.23573	7.72401	7.42926	7.30619	7.66298	7.51375	7.04382	7.44805	6.76338	7.00958	6.81949	7.03034	6.73321	6.79462	5.71151	0.328661	0.494914	T	T	2.11859	0.00170577	0.0500483	2e-07	3.42e-07	T	NM_006829; NM_133447; ENST00000372013; ENST00000416348; ENST00000561504; BC004471; BC140762; OTTHUMT00000049178; OTTHUMT00000049194; OTTHUMT00000049195; OTTHUMT00000433629	chr10	+	Multiple_Complex	10	10q23.2
		ADIRF antisense RNA 1 [Source:HGNC Symbol;Acc:HGNC:45127]; Transcript Identified by AceView, Entrez Gene ID(s) 79812; ADIRF antisense RNA 1; novel transcript, antisense to ADIRF	TC1000012574.hg.1	ADIRF-AS1; RP11-96C23.15; MMRN2		4.84983	4.89362	5.02659	4.75684	5.39633	4.5536	0.939109	4.85106	5.1505	5.19712	4.8354	4.6117	3.74326	4.35976	4.65605	5.22354	4.76009	4.7065	6.35858	4.9091	4.77021	5.60973	4.2355	4.51953	4.77289	4.48862	4.77698	4.89908	0.439782	0.092053	T	T	-1.08832	0.949317	0.98825	0.0686828	0.07133	T	ENST00000418273.2; ENST00000440490.1; ENST00000609111.1; ENST00000609170.1; ENST00000609363.1; MMRN2.kAug10; OTTHUMT00000471960; OTTHUMT00000471961; OTTHUMT00000471962; OTTHUMT00000471963; OTTHUMT00000471964; uc057uqw.1; uc057uqx.1; uc057uqy.1; uc057uqz.1; uc057urc.1	chr10	-	NonCoding	10
		Memczak2013 ANTISENSE, coding, INTERNAL, intronic best transcript NM_006721	TC1000011056.hg.1	ADK		5.16059	3.94151	3.58185	3.25518	4.24497	3.29484	0.336459	6.11999	4.63714	4.46342	4.24868	3.70764	3.67409	4.93604	2.43324	2.8578	2.7067	2.38172	3.80057	4.27233	3.63801	3.69736	3.44913	3.72629	3.64011	3.28528	3.27582	3.95265	0.560358	0.827439	T	T	-1.59863	0.0873168	0.375983	1.51e-05	2.1e-05	T	hsa_circ_0000250	chr10	-	NonCoding	6
		adenosine kinase; mitochondrial ribosomal protein L35 pseudogene 3	TC1000008063.hg.1	ADK; MRPL35P3		9.6268	9.47475	9.72172	9.57314	9.47953	9.16208	0.230892	9.11897	9.99275	9.05675	12.3687	12.6027	12.455	12.604	8.5836	8.67681	8.66166	9.02604	9.46694	9.39584	9.04858	9.09674	8.99677	8.71104	9.06673	8.83485	9.47666	9.61398	0.215448	0.124581	T	T	-1.09986	0.268414	0.627938	8.25e-16	7.15e-15	T	NM_001123; NM_001202449; NM_001202450; NM_006721; ENST00000286621; ENST00000372734; ENST00000467840; ENST00000478611; ENST00000539909; ENST00000541550; BC003568; OTTHUMT00000048761; OTTHUMT00000048763; OTTHUMT00000048764; OTTHUMT00000048765; OTTHUMT00000048766	chr10	+	Multiple_Complex	10	10q22|10q11-q24; 10q22.2
		adrenomedullin	TC1100006831.hg.1	ADM		6.29666	7.19528	5.9427	8.87916	6.2301	6.37164	0.507268	5.08195	4.97452	6.89408	9.57192	9.78757	9.53487	9.72472	7.26319	7.9253	7.59063	7.43269	12.9845	13.5352	13.5399	13.6461	12.047	11.7024	11.9092	11.902	6.30376	6.36494	1.49026	0.645725	T	T	-1.04332	0.13497	0.462434	1.24e-14	7.74e-14	T	NM_001124; ENST00000278175; ENST00000524948; ENST00000525063; ENST00000526492; ENST00000528544; ENST00000528655; ENST00000530439; ENST00000534464; BC015961; OTTHUMT00000387004; OTTHUMT00000387005; OTTHUMT00000387006; OTTHUMT00000387007; OTTHUMT00000387008; OTTHUMT00000387009; OTTHUMT00000387010; OTTHUMT00000387011	chr11	+	Coding	10	11p15.4
		adrenomedullin 2	TC2200007808.hg.1	ADM2		4.56421	3.87058	4.2235	4.34897	4.82483	4.05751	0.559163	6.0696	4.60682	4.6009	4.52148	4.10448	4.23076	4.31604	3.93953	4.23192	3.97133	4.73874	4.1606	3.77787	4.16065	4.16779	4.0477	3.88597	4.50131	4.15418	4.38985	4.22023	0.387335	0.346833	F	F	1.12477	0.435614	0.759288	0.00082217	0.000974356	F	NM_001253845; ENST00000395737; ENST00000395738; OTTHUMT00000316816; OTTHUMT00000316817	chr22	+	Multiple_Complex	10	22q13.33
		adrenomedullin 5 (putative); carnitine palmitoyltransferase 1C	TC1900011782.hg.1	ADM5; CPT1C		5.79589	4.89486	5.70747	6.32701	4.89665	5.51891	0.830902	4.88787	7.07093	5.95713	4.8094	5.83327	5.34124	5.45703	6.14847	5.35683	6.22997	5.99784	5.46901	6.0701	5.41788	4.42107	7.24161	6.69613	7.19435	7.06467	5.56522	5.74988	0.717189	0.496657	T	T	-1.13654	0.762126	0.925842	0.000229038	0.000286221	T	NM_001101340; NM_001136052; NM_001199752; NM_001199753; NM_152359; NR_108072; ENST00000295404; ENST00000323446; ENST00000392518; ENST00000405931; ENST00000420022; ENST00000594038; ENST00000594431; ENST00000594587; ENST00000595031; ENST00000595568; ENST00000595901; ENST00000595969; ENST00000596701; ENST00000596922; ENST00000597099; ENST00000598072; ENST00000598259; ENST00000598293; ENST00000598396…	chr19	+	Multiple_Complex	10	19q13.33
		activity-dependent neuroprotector homeobox	TC2000009440.hg.1	ADNP		12.6212	12.4614	12.4491	12.302	12.3788	12.2498	0.0401774	9.04562	10.0083	9.93919	10.8535	11.0287	10.9025	10.6934	12.5994	12.6128	12.4753	12.6571	11.6802	11.81	11.7396	11.3953	11.6869	11.8194	11.7501	12.0753	12.3078	12.4555	0.0648846	0.0960521	T	T	-1.10777	0.226252	0.584518	4.89e-14	2.64e-13	T	NM_001282531; NM_001282532; NM_015339; NM_181442; ENST00000349014; ENST00000371602; ENST00000396029; ENST00000396032; ENST00000534467; ENST00000621696; BC075794; BC090933; OTTHUMT00000079704; OTTHUMT00000079705; OTTHUMT00000258382; OTTHUMT00000383532; OTTHUMT00000418977	chr20	-	Multiple_Complex	10	20q13.13
		ADNP homeobox 2	TC1800007835.hg.1	ADNP2		8.20665	8.46873	8.13696	8.03169	8.22439	7.88993	0.187767	7.50589	10.7563	10.5732	7.30344	7.66767	7.75017	7.13377	9.45222	9.4258	9.25325	9.74818	6.15104	6.42239	6.36349	6.2057	7.46658	7.83077	7.73137	7.81917	8.04415	8.19967	0.167875	0.174935	T	T	-1.11383	0.256386	0.61544	8.26e-15	5.38e-14	T	NM_014913; ENST00000262198; ENST00000559951; ENST00000560561; ENST00000560752; ENST00000561195; BC071589; OTTHUMT00000418979; OTTHUMT00000418980; OTTHUMT00000418981; OTTHUMT00000418982; OTTHUMT00000418983	chr18	+	Multiple_Complex	10	18q23
		2-aminoethanethiol (cysteamine) dioxygenase	TC1000007779.hg.1	ADO		9.00069	8.70702	8.80672	8.4534	8.82239	8.73014	0.293974	5.89235	5.79664	6.42931	7.88031	7.71367	8.33481	8.59852	10.5104	10.5646	10.8082	10.5361	9.2842	8.95371	9.07386	9.32245	8.39587	8.13432	7.68507	8.15523	8.71796	8.82482	0.192028	0.149336	T	T	-1.07688	0.447335	0.76812	7.2e-14	3.75e-13	T	NM_032804; ENST00000373783; BC018660; BC028589; BC067740; OTTHUMT00000048243	chr10	+	Coding	10	10q21.3
		adenosine A1 receptor	TC0100011245.hg.1	ADORA1		5.03032	5.08944	4.82116	5.34906	4.88071	4.52912	0.820905	5.93227	5.70735	4.69177	4.43546	4.50287	4.2238	4.99591	9.27364	9.44317	9.35842	9.31284	5.94837	6.23514	5.86978	6.27782	6.53875	6.5309	6.14343	6.90944	4.90951	5.03136	0.411353	0.140959	T	T	-1.08813	0.790948	0.936558	9.54e-16	8.12e-15	T	NM_000674; NM_001048230; ENST00000309502; ENST00000337894; ENST00000367235; ENST00000367236; ENST00000464019; ENST00000467253; ENST00000472535; ENST00000618295; BC026340; OTTHUMT00000100273; OTTHUMT00000100274; OTTHUMT00000101318; OTTHUMT00000101319; OTTHUMT00000101320; OTTHUMT00000101321; uc001gze.1	chr1	+	Multiple_Complex	10	1q32.1
		adenosine A2a receptor	TC2200009233.hg.1	ADORA2A		7.55481	7.68444	7.96174	7.91663	7.53881	8.02442	0.650204	8.22839	9.7448	9.35062	8.31843	7.85406	8.39313	8.19554	8.01378	7.98144	7.77611	7.93392	7.56248	8.03484	7.87509	7.85445	8.93939	8.28577	8.76313	8.64538	7.91734	7.70979	0.255011	0.207883	T	T	1.15473	0.647311	0.879136	6.94e-07	1.12e-06	T	NM_000675; NM_001278497; NM_001278498; NM_001278499; NM_001278500; NR_103543; NR_103544; ENST00000337539; ENST00000424232; ENST00000436735; ENST00000439591; ENST00000444262; ENST00000464977; ENST00000467385; ENST00000472248; ENST00000486108; ENST00000486351; ENST00000496258; ENST00000496497; ENST00000610595; ENST00000611543; ENST00000618076; BC013780; OTTHUMT00000319971; OTTHUMT00000319972; OTTHU…	chr22	+	Multiple_Complex	10	22q11.23
		adenosine A2b receptor	TC1700006999.hg.1	ADORA2B		4.05646	4.59669	4.55164	4.32181	4.23734	4.62453	0.974779	4.4195	4.30079	4.25335	4.41131	4.37194	4.75045	4.25322	3.99106	4.11326	4.07332	4.06075	4.46035	4.43784	3.78647	4.518	4.29114	4.19528	4.21626	4.21777	4.31894	4.57325	0.203589	0.299745	F	F	-1.19277	0.972333	0.994095	0.569694	0.571346	F	NM_000676; ENST00000304222; ENST00000582124; BC025722; OTTHUMT00000131032; OTTHUMT00000444699	chr17	+	Multiple_Complex	10	17p12
		adenosine A3 receptor; transmembrane and immunoglobulin domain containing 3	TC0100015275.hg.1	ADORA3; TMIGD3		7.16616	7.91115	6.26766	7.76074	8.1785	7.48605	0.250164	5.85212	6.53626	7.1058	8.47608	8.29011	9.23552	8.06924	11.4338	11.7239	11.9754	11.9369	6.79906	6.1863	6.60067	6.62784	7.58986	7.02605	7.7546	7.07251	7.79385	7.12685	0.34868	0.822939	T	T	1.58777	0.0498041	0.283796	3.97e-13	1.75e-12	T	NM_000677; NM_001081976; NM_001302678; NM_001302679; NM_001302680; NM_020683; ENST00000241356; ENST00000369716; ENST00000369717; ENST00000414219; ENST00000442484; ENST00000443498; ENST00000463993; ENST00000472933; ENST00000486342; ENST00000495493; ENST00000632535; BC041707; BC064411; OTTHUMT00000032474; OTTHUMT00000032476; OTTHUMT00000032477; OTTHUMT00000032478; OTTHUMT00000032479; OTTHUMT0000003…	chr1	-	Multiple_Complex	10	1p13.2
		ADP-dependent glucokinase	TC1500009973.hg.1	ADPGK		6.14613	6.99381	7.02085	6.60847	6.42541	6.69528	0.65445	6.02273	5.99336	5.1246	7.11841	6.59117	7.46458	6.5716	6.51525	6.19622	6.53394	6.88708	5.8218	6.35759	6.45749	5.94372	8.3505	8.37356	8.22016	8.37507	6.59163	7.00678	0.137766	0.497398	T	T	-1.33344	0.582033	0.844617	2.15e-08	4.16e-08	T	NM_031284; NR_023318; NR_023319; ENST00000311669; ENST00000456471; ENST00000562286; ENST00000562621; ENST00000562823; ENST00000563907; ENST00000565814; ENST00000566509; ENST00000567733; ENST00000567941; ENST00000569058; ENST00000569517; ENST00000569534; ENST00000569693; BC006112; OTTHUMT00000420431; OTTHUMT00000420432; OTTHUMT00000420433; OTTHUMT00000420434; OTTHUMT00000420435; OTTHUMT00000420436…	chr15	-	Multiple_Complex	10	15q24.1
		ADP-ribosylarginine hydrolase	TC0300008482.hg.1	ADPRH		5.05001	4.96109	5.543	4.99165	5.27422	5.5446	0.74113	5.42842	6.45525	6.43855	5.37722	5.32872	5.45349	4.7396	5.04971	4.5739	4.87691	4.51735	6.9843	6.6769	6.82653	6.75254	6.39316	7.00075	6.60933	6.91192	5.27096	5.00736	0.276497	0.313466	T	T	1.20047	0.710391	0.907657	1.41e-09	3.21e-09	T	NM_001125; NM_001291949; NM_001291950; ENST00000357003; ENST00000465513; ENST00000471850; ENST00000478399; ENST00000478927; ENST00000481816; ENST00000485496; BC063883; BC074769; OTTHUMT00000355199; OTTHUMT00000355200; OTTHUMT00000355201; OTTHUMT00000355202; OTTHUMT00000355203; OTTHUMT00000355205; OTTHUMT00000355206; uc003ecs.3	chr3	+	Multiple_Complex	10	3q13.31-q13.33
		ADP-ribosylhydrolase like 1	TC1300009906.hg.1	ADPRHL1		6.29833	6.58472	5.98119	6.97253	6.51561	6.6841	0.117938	6.71944	7.67686	7.6646	6.2077	6.31891	6.37374	6.91475	5.33647	5.57679	5.59392	5.7371	9.24067	10.5298	9.87166	9.89471	6.17035	5.67268	6.49007	5.57742	6.70983	6.29024	0.231069	0.301895	T	T	1.33755	0.134258	0.461245	1.17e-12	4.64e-12	T	NM_138430; NM_199162; ENST00000356501; ENST00000375418; ENST00000413169; BC009755; OTTHUMT00000045914; OTTHUMT00000045915; OTTHUMT00000045916	chr13	-	Multiple_Complex	10	13q34
		ADP-ribosylhydrolase like 2	TC0100007791.hg.1	ADPRHL2		6.43465	6.34273	6.92856	6.41279	6.68731	6.79038	0.788026	6.61592	5.93397	6.58846	5.72738	6.24725	5.29868	6.14594	5.51143	5.69286	5.68157	6.07113	7.36277	7.87083	7.48412	7.30726	5.88369	6.08747	6.45708	6.02951	6.66847	6.39056	0.195175	0.315064	T	T	1.21243	0.801607	0.940478	1.37e-06	2.12e-06	T	NM_017825; ENST00000373178; BC014169; OTTHUMT00000020199	chr1	+	Multiple_Complex	10	1p34.3
		ADP-ribose/CDP-alcohol diphosphatase, manganese-dependent	TC1700006877.hg.1	ADPRM		6.95257	6.89253	7.23927	7.17877	7.28365	6.9941	0.414605	6.14482	7.78916	9.03286	6.73222	5.65756	6.65846	6.41469	6.11914	6.21047	6.2787	6.32047	7.17605	7.22814	8.00521	7.55541	7.13521	6.83228	7.83595	6.98677	7.16201	6.92506	0.146596	0.185306	T	T	1.1785	0.652054	0.881795	1.73e-06	2.67e-06	T	NM_020233; ENST00000379774; ENST00000468843; ENST00000527582; ENST00000609540; BC001294; BC070155; OTTHUMT00000252732; OTTHUMT00000252733; OTTHUMT00000390880; OTTHUMT00000472086	chr17	+	Multiple_Complex	10	17p13.1
		adrenoceptor alpha 1A	TC0800012393.hg.1	ADRA1A		4.73418	4.75594	4.30106	4.0318	5.37876	5.08263	0.618914	6.658	7.18214	5.88674	11.6742	11.7007	11.532	11.0251	3.78967	4.0407	3.97162	3.47069	4.86991	4.98645	4.59603	5.04139	7.33576	8.29783	7.3621	7.86009	5.08909	4.74462	0.707842	0.256574	T	F	1.26968	0.43909	0.76188	1.03e-17	1.69e-16	F	NM_000680; NM_033302; NM_033303; NM_033304; ENST00000276393; ENST00000354550; ENST00000380572; ENST00000380582; ENST00000380586; ENST00000518621; ENST00000518810; ENST00000519096; ENST00000519229; ENST00000521711; BC095512; OTTHUMT00000216927; OTTHUMT00000216928; OTTHUMT00000216929; OTTHUMT00000216930; OTTHUMT00000376205; OTTHUMT00000376206; OTTHUMT00000376207; OTTHUMT00000376209; OTTHUMT00000376…	chr8	-	Multiple_Complex	10	8p21.2
		adrenoceptor alpha 1B	TC0500009264.hg.1	ADRA1B		5.1484	4.41049	4.73793	5.82063	5.28829	5.20243	0.0801191	4.40518	4.67282	4.26452	6.91497	7.44577	6.85502	7.24606	4.13555	3.95029	4.72766	4.40419	4.74998	4.23106	5.02851	4.91706	6.19201	6.69582	6.74209	6.11614	5.24711	4.7589	0.334895	0.369733	T	T	1.4027	0.0188316	0.171508	2.05e-10	5.35e-10	T	NM_000679; ENST00000306675; BC136568; BC136569; OTTHUMT00000252676	chr5	+	Coding	10	5q33.3
		adrenoceptor alpha 1D	TC2000008253.hg.1	ADRA1D		4.09016	4.09143	4.54126	3.3928	4.35688	3.59022	0.235136	4.56636	4.26836	3.97391	4.37151	4.30352	4.44797	4.5966	4.14367	4.17394	4.45637	4.18719	4.06409	4.17013	4.64283	4.75053	4.53479	4.66396	4.13734	4.75513	3.5608	4.09082	0.509279	0.260077	F	F	-1.44396	0.0667703	0.328205	0.105724	0.108809	F	NM_000678; ENST00000379453; ENST00000621688; OTTHUMT00000077812; OTTHUMT00000473453	chr20	-	Multiple_Complex	10	20p13
		adrenoceptor alpha 2A	TC1000008913.hg.1	ADRA2A		3.5658	3.69799	3.42247	3.90935	3.72609	3.78175	0.0646441	3.78307	3.78379	3.61657	3.75666	3.40477	3.46053	3.68417	3.94467	3.87973	3.96415	3.83178	3.43364	3.49616	3.49801	3.47331	4.67227	4.86277	4.35543	4.15925	3.79288	3.56285	0.0939539	0.137797	T	F	1.17285	0.179154	0.530688	5.54e-05	7.32e-05	F	NM_000681; ENST00000280155; BC035047; BC050414; OTTHUMT00000050372	chr10	+	Coding	10	10q25.2
		adrenoceptor alpha 2B	TC0200013509.hg.1	ADRA2B		3.7168	3.66467	3.73297	3.43707	3.62082	3.04695	0.11956	3.65685	3.49019	3.76824	5.21753	5.36274	5.18142	4.40974	2.94469	3.23493	3.35442	3.16016	3.08929	3.88171	4.13411	3.64772	3.42015	3.68374	3.14293	3.85294	3.40129	3.7155	0.293054	0.0356929	F	F	-1.24333	0.210762	0.566731	4.7e-06	6.92e-06	F	NM_000682; ENST00000620793; BC133021; BC136537; OTTHUMT00000476809	chr2	-	Coding	10	2q11.1
		adrenoceptor alpha 2C	TC0400006616.hg.1	ADRA2C		6.25339	5.6563	5.95555	6.63402	6.33964	5.96077	0.242567	6.85812	6.49129	7.3707	6.44315	6.32023	6.41903	6.53372	6.65888	6.48981	6.21422	6.32573	7.44227	6.74344	8.02965	7.26074	6.86641	7.46119	7.33121	7.61179	6.31851	5.95517	0.337507	0.298545	T	T	1.2864	0.185579	0.536501	4.61e-05	6.13e-05	T	NM_000683; ENST00000330055; ENST00000509482; BC142625; OTTHUMT00000357606; OTTHUMT00000357607	chr4	+	Coding	10	4p16
		adrenoceptor beta 1	TC1000008968.hg.1	ADRB1		6.03554	5.97568	5.95687	5.97406	5.5421	6.02526	0.410926	5.68133	5.91733	5.51925	5.64166	5.53212	5.61242	5.42257	4.40554	5.06223	4.76603	4.97105	5.37196	5.09164	5.22641	5.4861	6.33037	5.84546	6.46187	6.28635	5.99862	5.9774	0.26541	0.0410813	T	T	1.01482	0.479732	0.788632	3.11e-06	4.65e-06	T	NM_000684; ENST00000369295; OTTHUMT00000050448	chr10	+	Multiple_Complex	10	10q25.3
		adrenoceptor beta 2, surface	TC0500009046.hg.1	ADRB2		4.17546	3.83144	3.33755	3.40506	3.48679	3.29902	0.197649	4.33518	4.08897	3.54176	4.54319	5.7212	5.04755	5.11182	3.38755	3.34017	2.45799	2.81312	6.19223	6.36917	6.11301	5.4487	5.25452	4.37654	4.92271	5.23062	3.399	3.7957	0.0941469	0.421183	F	F	-1.31649	0.228992	0.587139	4.69e-09	9.89e-09	F	NM_000024; ENST00000305988; BC012481; BC063486; BC073856; OTTHUMT00000252189	chr5	+	Coding	10	5q31-q32
		adrenoceptor beta 3	TC0800010144.hg.1	ADRB3		2.78408	2.66941	2.97836	2.94669	2.85449	2.80684	0.585244	2.46289	2.91089	3.07286	2.81843	2.99916	2.73722	2.76636	2.57896	2.60376	2.48219	2.87663	2.59888	2.66747	2.57299	2.70723	2.67736	2.76067	2.9478	2.62487	2.86309	2.80129	0.0710979	0.156175	F	F	1.04377	0.71375	0.908615	0.285314	0.288488	F	NM_000025; ENST00000345060; ENST00000520341; ENST00000614635; BC075017; OTTHUMT00000376826; OTTHUMT00000376827	chr8	-	Multiple_Complex	10	8p11.23
		adrenergic, beta, receptor kinase 1	TC1100008123.hg.1	ADRBK1		6.8682	7.25972	7.26726	6.86473	6.80559	7.28982	0.511652	5.93252	5.83322	7.60038	8.02886	7.81169	7.26372	7.75832	6.3432	6.14614	6.17894	6.64496	7.74249	7.50613	8.1453	7.59497	10.5769	10.3684	10.9275	10.6697	6.83637	7.26334	0.264158	0.228252	T	T	-1.34441	0.52574	0.812632	7.75e-15	5.09e-14	T	NM_001619; ENST00000308595; ENST00000416281; ENST00000524899; ENST00000526285; ENST00000526572; ENST00000527176; ENST00000529738; ENST00000529815; ENST00000530291; ENST00000531390; ENST00000532099; ENST00000532611; ENST00000533077; ENST00000534651; BC037963; BC090863; OTTHUMT00000393153; OTTHUMT00000393154; OTTHUMT00000393155; OTTHUMT00000393156; OTTHUMT00000393157; OTTHUMT00000393158; OTTHUMT000…	chr11	+	Multiple_Complex	10	11q13.1
		adrenergic, beta, receptor kinase 2	TC2200006935.hg.1	ADRBK2		7.23781	7.19601	7.05097	7.90481	6.81137	6.88158	0.921262	5.77395	4.74816	4.91179	6.7326	5.90263	6.63411	7.04914	9.72103	9.62757	9.49677	9.61524	5.68096	4.32973	5.83059	5.38116	11.112	10.63	11.1458	10.7495	6.84791	7.19577	0.612038	0.0980587	T	T	-1.27268	0.910312	0.975889	1.32e-14	8.16e-14	T	NM_005160; ENST00000324198; ENST00000455558; ENST00000619906; BC036797; OTTHUMT00000317296; OTTHUMT00000320369	chr22	+	Multiple_Complex	10	22q12.1
		adhesion regulating molecule 1	TC2000008001.hg.1	ADRM1		7.7291	8.04173	8.11314	7.12368	8.11699	8.33964	0.808955	9.11458	8.77247	9.74994	10.3881	10.5783	10.2422	10.1479	10.1243	10.0937	9.79198	9.95105	11.0079	11.5242	11.934	11.4715	8.77066	9.04071	8.78252	8.64452	8.20045	8.06639	0.647404	0.204256	T	T	1.09738	0.696145	0.902053	3.18e-12	1.16e-11	T	NM_001281437; NM_001281438; NM_007002; NM_175573; ENST00000253003; ENST00000462554; ENST00000465805; ENST00000491935; ENST00000620230; BC017245; OTTHUMT00000080007; OTTHUMT00000080009; OTTHUMT00000080010	chr20	+	Multiple_Complex	10	20q13.33
		adenylosuccinate lyase	TC2200009275.hg.1	ADSL		8.99326	8.97126	9.54664	8.29277	9.27327	9.02772	0.431072	6.58026	7.09918	7.67428	9.14646	9.03697	8.89726	8.98252	9.04671	8.7435	8.86411	8.62726	11.5653	11.84	11.9749	11.5613	9.36041	9.15959	8.80506	9.24866	8.995	8.98271	0.5102	0.326031	T	T	1.00856	0.193657	0.545959	1.28e-13	6.28e-13	T	NM_000026; NM_001123378; ENST00000216194; ENST00000342312; ENST00000423176; ENST00000466863; ENST00000477111; ENST00000480775; ENST00000623063; ENST00000623287; ENST00000623387; ENST00000623632; ENST00000623978; ENST00000624027; ENST00000624474; ENST00000624503; ENST00000625194; BC000253; OTTHUMT00000321386; OTTHUMT00000321387; OTTHUMT00000321388; OTTHUMT00000321390; OTTHUMT00000321391; OTTHUMT00…	chr22	+	Multiple_Complex	10	22q13.2
		adenylosuccinate synthase	TC0100018006.hg.1	ADSS		9.1665	9.32839	9.21803	9.35021	9.46675	9.30284	0.117651	6.72503	7.11413	6.13246	8.29859	8.60915	8.2857	8.96119	11.8931	11.9667	11.6825	11.9483	8.33096	8.36807	8.59427	7.62796	9.49042	9.10825	8.93903	9.41651	9.35955	9.22812	0.0843524	0.0827074	T	T	1.09538	0.552217	0.826936	4.35e-15	3.06e-14	T	NM_001126; ENST00000366535; ENST00000462358; ENST00000468215; BC012356; OTTHUMT00000096697; OTTHUMT00000096699; OTTHUMT00000096700	chr1	-	Multiple_Complex	10	1q44
		adenylosuccinate synthase like 1	TC1400008452.hg.1	ADSSL1		6.8724	5.83584	6.34404	6.59665	6.52389	6.18389	0.808788	7.98748	6.78709	7.88291	10.5831	10.5051	10.8595	10.8039	8.73017	8.87722	8.8412	9.0018	12.406	13.0551	12.7719	13.0119	6.06495	5.66635	6.11763	5.95023	6.55566	6.34943	0.220328	0.518312	T	T	1.15367	0.714799	0.908902	7.79e-20	2.97e-18	T	NM_152328; NM_199165; ENST00000330877; ENST00000332972; ENST00000553540; ENST00000553580; ENST00000554281; ENST00000554657; ENST00000555486; ENST00000555674; ENST00000555884; ENST00000556623; ENST00000557271; ENST00000557582; BC047904; OTTHUMT00000410529; OTTHUMT00000410530; OTTHUMT00000410531; OTTHUMT00000410532; OTTHUMT00000410533; OTTHUMT00000410534; OTTHUMT00000410535; OTTHUMT00000410536; OTT…	chr14	+	Multiple_Complex	10	14q32.33
		androgen-dependent TFPI-regulating protein	TC0600010825.hg.1	ADTRP		4.64881	5.03489	4.58408	4.64052	4.97346	4.6474	0.991038	8.69378	6.18795	5.81433	5.03258	4.63286	4.65109	4.47745	7.60833	7.81709	7.62477	7.7905	4.8535	6.02847	4.70049	5.16	4.63583	4.43718	4.83839	4.40902	4.6441	4.61776	0.190268	0.243748	T	T	1.01842	0.993359	0.998601	1.29e-12	5.05e-12	T	NM_001143948; NM_032744; ENST00000229583; ENST00000379415; ENST00000414691; ENST00000485323; ENST00000503285; ENST00000505099; ENST00000506810; ENST00000512139; ENST00000513651; ENST00000514824; BC007011; OTTHUMT00000039863; OTTHUMT00000039864; OTTHUMT00000039865; OTTHUMT00000367632; OTTHUMT00000367633; OTTHUMT00000367634; OTTHUMT00000367635; OTTHUMT00000367636; OTTHUMT00000367637; OTTHUMT0000036…	chr6	-	Multiple_Complex	10	6p24.1
		AE binding protein 1; microRNA 4649	TC0700007370.hg.1	AEBP1; MIR4649		9.94478	11.2069	9.09394	11.6334	10.6151	10.7763	0.250723	8.25649	8.67913	9.53026	8.77906	8.63152	8.76345	8.46511	12.1126	11.8748	12.0086	11.7988	10.9099	11.0446	11.2423	11.1649	12.2596	12.2026	11.9725	11.8674	10.699	10.0412	0.547327	1.06312	T	T	1.57766	0.0109714	0.131314	1.5e-10	4e-10	T	NM_001129; NR_039792; ENST00000223357; ENST00000413907; ENST00000431035; ENST00000434445; ENST00000449162; ENST00000450684; ENST00000453052; ENST00000454218; ENST00000455443; ENST00000582839; BC038588; OTTHUMT00000250993; OTTHUMT00000339661; OTTHUMT00000339662; OTTHUMT00000339663; OTTHUMT00000339664; OTTHUMT00000339685; OTTHUMT00000339686; OTTHUMT00000339687; OTTHUMT00000339688	chr7	+	Multiple_Complex	10	7p13
		AE binding protein 2	TC1200012599.hg.1	AEBP2		12.1549	12.3143	11.8832	12.06	12.0985	12.2831	0.845816	11.1976	10.9055	11.4814	9.31579	9.51869	9.41235	9.555	10.8666	10.5827	10.7189	10.8191	10.6302	10.3046	10.376	10.3435	11.1108	11.0149	10.8332	10.8643	12.0807	12.1308	0.119269	0.217991	T	T	-1.03532	0.857681	0.962175	3.43e-13	1.53e-12	T	NM_001114176; NM_001267043; NM_153207; ENST00000266508; ENST00000360995; ENST00000398864; ENST00000538425; ENST00000541908; BC015624; BC022220; OTTHUMT00000401573; OTTHUMT00000401574; OTTHUMT00000401575; OTTHUMT00000401577; OTTHUMT00000401578; uc001ref.2	chr12	+	Multiple_Complex	10	12p12.3
		apoptosis enhancing nuclease	TC1500008231.hg.1	AEN		9.09021	7.80517	9.86717	7.43684	8.22213	8.25206	0.221986	6.83223	6.30772	6.57341	8.72676	9.03393	9.13779	8.5865	8.8184	9.00302	9.26229	9.16152	11.3196	11.7443	11.7298	11.7622	9.09224	9.19532	9.01521	8.71456	8.23649	8.97854	0.46227	1.04138	T	T	-1.67255	0.00950808	0.12107	4.99e-11	1.44e-10	T	NM_022767; ENST00000332810; ENST00000557787; ENST00000557927; ENST00000558327; ENST00000559528; ENST00000560174; BC005164; BC014407; BC020988; OTTHUMT00000309071; OTTHUMT00000415448; OTTHUMT00000415449; OTTHUMT00000415450; OTTHUMT00000415451; OTTHUMT00000415453	chr15	+	Multiple_Complex	10	15q26.1
		amino-terminal enhancer of split	TC1900009272.hg.1	AES		15.1284	15.5649	15.0603	14.9288	15.1507	15.2311	0.462834	9.42477	10.1019	10.2935	12.5143	12.5747	12.6467	12.7518	12.0189	11.8337	11.9582	11.3922	13.4562	13.8559	13.9289	13.8106	14.0043	13.5169	13.6598	13.8548	15.1369	15.0958	0.156573	0.273784	T	T	1.02895	0.464862	0.778055	2.64e-17	3.76e-16	T	NM_001130; NM_198969; NM_198970; ENST00000221561; ENST00000327141; ENST00000585557; ENST00000585782; ENST00000586003; ENST00000586742; ENST00000586839; ENST00000587083; ENST00000587393; ENST00000590067; ENST00000592330; ENST00000592414; BC113735; BC113737; OTTHUMT00000451926; OTTHUMT00000452152; OTTHUMT00000452153; OTTHUMT00000452154; OTTHUMT00000452155; OTTHUMT00000452156; OTTHUMT00000452157; OT…	chr19	-	Multiple_Complex	10	19p13.3
		Memczak2013 ALT_ACCEPTOR, ALT_DONOR, coding, INTERNAL, intronic best transcript NM_173683; novel transcript	TC0800009589.hg.1	AF131215.3; XKR6		3.5169	3.7789	4.36889	3.87154	4.74912	4.02194	0.42807	3.84585	4.17081	4.44745	4.39683	4.18066	4.47277	3.50056	3.66308	3.77132	3.80258	3.95455	3.28205	3.20341	3.5635	4.24911	4.68199	4.75037	4.62571	4.80092	3.95157	3.8311	0.469318	0.43639	T	F	1.08709	0.265763	0.624668	0.0106423	0.0116078	F	ENST00000500944.2; ENST00000526648.2; hsa_circ_0001779; OTTHUMT00000383955; uc010lrv.2	chr8	-	Multiple_Complex	10
		actin filament associated protein 1	TC0400009953.hg.1	AFAP1		4.35917	4.81403	4.78397	4.69231	5.06607	5.69607	0.202365	4.34901	3.78515	4.19661	5.22174	5.30221	4.61569	4.02597	7.11409	6.58726	7.72875	6.48563	5.38635	5.82208	5.54358	4.80591	4.93919	5.12036	5.29205	4.93686	5.12166	4.79839	0.507302	0.25438	T	F	1.25117	0.157922	0.498485	9.13e-07	1.45e-06	F	NM_001134647; NM_198595; ENST00000358461; ENST00000360265; ENST00000382543; ENST00000420658; ENST00000505447; ENST00000508415; ENST00000513842; ENST00000513856; ENST00000612691; ENST00000614385; BC032777; OTTHUMT00000246842; OTTHUMT00000358893; OTTHUMT00000358894; OTTHUMT00000358895; OTTHUMT00000358896; OTTHUMT00000358899; OTTHUMT00000476362; OTTHUMT00000476363	chr4	-	Multiple_Complex	10	4p16
		actin filament associated protein 1-like 1	TC0500009058.hg.1	AFAP1L1		5.06587	4.52811	5.00888	4.78844	4.63167	4.47325	0.288297	4.85343	5.17733	4.26982	5.28871	5.448	4.958	5.05898	4.14641	4.24042	4.17563	4.35454	6.81106	6.74723	7.58342	6.84016	6.87679	6.49548	6.4481	6.45212	4.63123	5.03621	0.157596	0.295402	F	T	-1.32408	0.286561	0.645962	5.16e-12	1.8e-11	F	NM_001146337; NM_152406; ENST00000296721; ENST00000455574; ENST00000508444; ENST00000513665; ENST00000515000; ENST00000522492; BC125093; BC125094; OTTHUMT00000373443; OTTHUMT00000373495; OTTHUMT00000373496; OTTHUMT00000373497; OTTHUMT00000373498; OTTHUMT00000381681	chr5	+	Multiple_Complex	10	5q32
		actin filament associated protein 1-like 2	TC1000011899.hg.1	AFAP1L2		5.2998	4.9179	4.72874	5.051	5.68316	5.15603	0.289379	7.54361	7.26032	4.30841	4.37958	4.33516	4.69777	4.56882	4.44836	4.21076	4.51163	4.14229	5.32698	4.95514	5.07596	4.87208	10.3522	9.35848	9.37901	10.0304	5.10566	4.95345	0.338753	0.2909	T	T	1.11127	0.212107	0.568018	9.35e-17	1.09e-15	T	NM_001001936; NM_001287824; NM_032550; ENST00000304129; ENST00000369271; ENST00000419268; ENST00000483496; ENST00000486300; ENST00000491814; BC024314; BC033212; OTTHUMT00000050461; OTTHUMT00000050462; OTTHUMT00000050463; OTTHUMT00000050464; OTTHUMT00000050466; OTTHUMT00000050467	chr10	-	Multiple_Complex	10	10q25.3
		AF4/FMR2 family, member 1	TC0400008053.hg.1	AFF1		14.1568	14.6476	14.2862	13.9435	14.3537	14.2982	0.445176	14.395	14.2447	14.3248	11.6986	11.8036	11.9339	11.797	10.8891	11.4347	11.0981	11.1224	14.343	14.4441	14.2804	14.5359	14.4701	14.3933	14.5597	14.3993	14.3248	14.3079	0.222509	0.254394	T	T	1.0118	0.359719	0.706464	1.2e-16	1.34e-15	T	NM_001166693; NM_005935; ENST00000307808; ENST00000395146; ENST00000503369; ENST00000503477; ENST00000504956; ENST00000507468; ENST00000511442; ENST00000511722; ENST00000511996; ENST00000514970; ENST00000544085; BC114930; OTTHUMT00000253053; OTTHUMT00000363457; OTTHUMT00000363458; OTTHUMT00000363459; OTTHUMT00000363460; OTTHUMT00000363461; OTTHUMT00000363462; OTTHUMT00000363463; OTTHUMT0000036346…	chr4	+	Multiple_Complex	10	4q21
		AF4/FMR2 family, member 2	TC0X00008674.hg.1	AFF2		3.84432	5.51182	3.77263	4.2926	4.88277	4.80943	0.658011	3.88218	4.88432	5.0182	3.60092	3.79353	4.64757	4.49962	8.07244	7.74249	7.76766	7.90063	3.60153	4.03279	4.54685	4.12018	6.02256	6.3194	6.22912	5.54012	4.8446	3.80994	0.32166	0.98408	T	F	2.04864	0.439945	0.762315	5.06e-10	1.24e-09	F	NM_001169122; NM_001169123; NM_001169124; NM_001169125; NM_001170628; NM_002025; ENST00000286437; ENST00000342251; ENST00000370457; ENST00000370458; ENST00000370460; BC132683; BC143740; BC143744; OTTHUMT00000058673; OTTHUMT00000058674; OTTHUMT00000058675; OTTHUMT00000487796; uc004fcp.3; uc011mxc.2	chrX	+	Multiple_Complex	10	Xq28
	#	AF4/FMR2 family, member 3	TC0200013616.hg.1	AFF3		10.6608	5.82341	11.0697	7.78802	6.22446	6.4339	0.248267	4.49567	3.63617	7.07839	6.24732	7.01743	6.70636	6.34022	8.31148	8.11726	8.26849	8.01757	4.45643	3.35251	4.55187	3.33042	11.0577	10.8002	10.4113	11.1763	6.33345	10.8569	0.848747	2.91807	T	T	-22.9981	0.00690476	0.102416	5.74e-08	1.05e-07	T	NM_001025108; NM_002285; ENST00000317233; ENST00000409236; ENST00000409579; ENST00000415384; ENST00000416492; ENST00000423966; ENST00000424600; ENST00000427118; ENST00000430789; ENST00000432037; ENST00000440445; ENST00000441400; ENST00000445815; ENST00000483600; ENST00000498090; BC136579; BC144266; OTTHUMT00000328982; OTTHUMT00000328983; OTTHUMT00000328984; OTTHUMT00000328986; OTTHUMT00000328987;…	chr2	-	Multiple_Complex	10	2q11.2-q12
		Memczak2013 ALT_ACCEPTOR, ALT_DONOR, coding, INTERNAL, intronic best transcript NM_001025108	TC0200013627.hg.1	AFF3		3.78458	4.40707	4.44159	3.33238	3.69383	3.85757	0.0916561	5.84085	3.78013	4.2823	3.00289	3.07348	2.83606	3.2655	2.83645	2.85421	2.74404	3.18452	3.12434	4.09023	3.32388	4.24106	3.06489	3.79061	3.56712	3.57695	3.66138	4.42363	0.268726	0.369763	F	F	-1.69613	0.0405325	0.254259	2.64e-06	3.99e-06	F	hsa_circ_0001054	chr2	-	NonCoding	6
		Memczak2013 ANTISENSE, CDS, coding, INTERNAL best transcript NM_014423	TC0500008656.hg.1	AFF4		5.79703	6.02975	6.64718	6.21693	6.22109	6.14555	0.892928	8.3568	8.99368	10.62	5.19132	5.90526	5.44017	6.09718	5.72128	6.07649	5.81616	5.45267	6.0663	6.42168	6.66483	6.59075	5.74706	5.79414	6.19463	6.13362	6.21893	6.07252	0.0424632	0.439343	T	T	1.10681	0.884216	0.970073	5.63e-12	1.95e-11	T	hsa_circ_0001530	chr5	+	NonCoding	10
		AF4/FMR2 family, member 4	TC0500012032.hg.1	AFF4		13.9381	13.8358	13.8901	13.4763	13.6845	13.6231	0.0128133	10.195	11.3016	12.5875	10.0114	9.93496	9.91152	9.88055	11.8836	11.8692	11.7919	11.9158	11.7799	11.8045	11.7279	11.7323	11.7546	11.6467	11.8623	11.814	13.6109	13.8884	0.107002	0.0511669	T	T	-1.21213	0.0474329	0.276226	3.89e-18	7.47e-17	T	NM_014423; ENST00000265343; ENST00000378593; ENST00000378595; ENST00000421773; ENST00000425658; ENST00000465484; ENST00000477369; ENST00000478588; ENST00000491831; BC137226; OTTHUMT00000133049; OTTHUMT00000251004; OTTHUMT00000251005; OTTHUMT00000251006; OTTHUMT00000251007; OTTHUMT00000251008; OTTHUMT00000251009; OTTHUMT00000251010; OTTHUMT00000315753	chr5	-	Multiple_Complex	10	5q31
		AFG3-like AAA ATPase 2	TC1800008116.hg.1	AFG3L2		11.674	11.4431	11.9318	11.173	11.5186	11.5969	0.257376	7.98862	7.50156	9.65888	11.6756	11.9108	11.9204	11.6574	10.2029	10.025	10.2233	10.1763	13.4108	13.4418	13.5296	13.5259	9.80524	9.67916	10.0542	10.0522	11.5467	11.6811	0.225563	0.244489	T	T	-1.09761	0.156905	0.497088	4.83e-18	8.94e-17	T	NM_006796; ENST00000269143; ENST00000588893; ENST00000590811; ENST00000591848; BC065016; OTTHUMT00000254603; OTTHUMT00000452968; OTTHUMT00000452969; OTTHUMT00000452970	chr18	-	Multiple_Complex	10	18p11
		afamin	TC0400007832.hg.1	AFM		3.22241	3.21273	3.37215	3.1948	3.65682	3.11115	0.784641	4.61225	5.61983	3.85925	12.1337	12.1054	11.8362	11.8895	3.16127	3.07576	3.04732	2.53204	4.45251	3.37399	3.86029	3.48304	2.89371	3.31118	2.87041	3.07787	3.15468	3.21777	0.293886	0.0893779	F	F	-1.0447	0.830529	0.952576	8.21e-22	7.49e-20	F	NM_001133; ENST00000226355; ENST00000505794; BC109020; BC109021; OTTHUMT00000252275; OTTHUMT00000365416	chr4	+	Multiple_Complex	10	4q13.3
		arylformamidase	TC1700009042.hg.1	AFMID		4.39452	4.30833	4.68584	4.56542	4.57874	4.40526	0.695011	5.00717	4.32594	3.69911	11.3574	11.1863	10.9827	11.3744	6.07502	5.3449	4.85486	5.51462	6.0046	5.89389	6.30816	6.33804	6.43261	6.45103	6.67698	6.7232	4.57181	4.39747	0.0965436	0.197826	F	F	1.12845	0.816935	0.947178	3.64e-19	1.05e-17	F	NM_001010982; NM_001145526; NR_027083; ENST00000327898; ENST00000409257; ENST00000585419; ENST00000586542; ENST00000586731; ENST00000587750; ENST00000588199; ENST00000588800; ENST00000589107; ENST00000589256; ENST00000589664; ENST00000591256; ENST00000591538; ENST00000591952; ENST00000592988; BC132824; OTTHUMT00000333203; OTTHUMT00000333204; OTTHUMT00000333205; OTTHUMT00000333206; OTTHUMT00000333…	chr17	+	Multiple_Complex	10	17q25.3
		alpha-fetoprotein	TC0400007831.hg.1	AFP		3.95977	3.5674	3.58515	4.09499	3.93538	3.15756	0.940368	5.08362	4.55789	5.46874	4.15377	3.81546	4.06213	3.69511	2.77355	2.79005	2.61192	3.05256	4.75714	3.52592	3.47765	4.0379	3.05519	3.2049	3.16817	2.85519	4.01081	3.57664	0.50154	0.221589	F	F	1.35113	0.928118	0.982401	1.74e-06	2.68e-06	F	NM_001134; ENST00000226359; ENST00000395792; ENST00000506820; ENST00000508838; ENST00000513720; ENST00000514279; ENST00000515675; BC027881; OTTHUMT00000252284; OTTHUMT00000365431; OTTHUMT00000365432; OTTHUMT00000365433; OTTHUMT00000365434; OTTHUMT00000365435; OTTHUMT00000365436	chr4	+	Multiple_Complex	10	4q13.3
		aftiphilin	TC0200007805.hg.1	AFTPH		12.1502	12.0448	12.0159	12.3683	11.8885	12.2034	0.601011	11.2827	11.5304	12.2046	11.6775	11.7356	11.484	11.8692	12.084	12.0103	12.1933	12.1868	11.8636	11.88	11.7562	11.9948	12.6371	12.5117	12.5311	12.5121	12.1741	12.0433	0.243766	0.0706756	T	T	1.09488	0.606556	0.858882	3.25e-05	4.4e-05	T	NM_001002243; NM_017657; NM_203437; ENST00000238855; ENST00000238856; ENST00000409183; ENST00000409933; ENST00000422803; ENST00000487769; ENST00000498706; BC047529; OTTHUMT00000251729; OTTHUMT00000327301; OTTHUMT00000327302; OTTHUMT00000327303; OTTHUMT00000327304	chr2	+	Multiple_Complex	10	2p14
		aspartylglucosaminidase	TC0400012496.hg.1	AGA		10.7928	10.5498	10.4875	10.2944	9.88463	10.4179	0.0917983	8.85347	10.1776	10.5663	12.3686	12.6024	12.4189	12.2857	9.8292	9.68557	10.0521	9.65782	7.9387	8.24941	7.88111	7.99881	8.37794	8.79848	8.81045	8.80826	10.288	10.5403	0.279144	0.161323	T	T	-1.19104	0.0374193	0.244611	2.06e-16	2.11e-15	T	NM_000027; NM_001171988; NR_033655; ENST00000264595; ENST00000502310; ENST00000506853; ENST00000510635; ENST00000510955; ENST00000511231; BC012392; OTTHUMT00000361916; OTTHUMT00000361917; OTTHUMT00000361918; OTTHUMT00000361919; OTTHUMT00000361920; OTTHUMT00000361921	chr4	-	Multiple_Complex	10	4q34.3
		ArfGAP with GTPase domain, ankyrin repeat and PH domain 1	TC0200011188.hg.1	AGAP1		7.65321	7.24123	7.45693	8.27749	7.11122	7.16451	0.874074	6.99452	6.98429	7.72121	7.17317	6.99062	7.00064	6.92864	7.20393	7.82764	7.35311	7.67877	7.20474	7.55673	7.91172	7.34354	7.18501	7.12673	7.2433	7.07037	7.13895	7.45181	0.658502	0.206066	T	T	-1.24217	0.791369	0.936644	0.153297	0.156485	T	NM_001037131; NM_001244888; NM_014914; ENST00000304032; ENST00000336665; ENST00000402604; ENST00000409457; ENST00000409538; ENST00000418654; ENST00000428334; ENST00000448025; ENST00000453371; ENST00000466575; ENST00000482882; ENST00000614409; ENST00000619456; BC140856; BC167153; BC167157; OTTHUMT00000257076; OTTHUMT00000257077; OTTHUMT00000329672; OTTHUMT00000329673; OTTHUMT00000329674; OTTHUMT00…	chr2	+	Multiple_Complex	10	2q37
		Jeck2013 ALT_ACCEPTOR, ALT_DONOR, coding, INTERNAL, intronic best transcript NM_001037131; Transcript Identified by AceView	TC0200011195.hg.1	AGAP1; noygloy; torkeybo		4.88311	4.60746	4.55092	4.70469	5.23585	4.16932	0.947386	4.44976	4.26727	4.32824	4.80277	3.88052	3.99172	4.64385	3.99349	3.63626	4.01907	4.09884	3.53916	3.76518	3.94164	3.88768	3.8893	3.82525	3.9819	4.24403	4.70355	4.58073	0.533266	0.177731	T	T	1.08886	0.92956	0.982881	0.0087332	0.00958891	T	hsa_circ_0006177; noygloy.aAug10-unspliced; torkeybo.aAug10-unspliced	chr2	+	Multiple_Complex	10
		ArfGAP with GTPase domain, ankyrin repeat and PH domain 2	TC1200010976.hg.1	AGAP2		3.92733	4.96514	4.70938	5.79239	4.93578	4.19809	0.471982	4.82445	4.47135	5.20984	5.53046	5.02678	5.52885	3.79151	3.27689	3.98364	3.77748	3.76334	6.36142	5.82255	5.6283	5.22573	6.82625	7.1622	6.56186	7.75019	4.96661	4.67877	0.797889	0.540689	T	T	1.22081	0.315587	0.6723	1.77e-06	2.72e-06	T	NM_001122772; NM_014770; ENST00000257897; ENST00000328568; ENST00000547588; ENST00000549129; BC028020; OTTHUMT00000408365; OTTHUMT00000408366; OTTHUMT00000408367; OTTHUMT00000408774	chr12	-	Multiple_Complex	10	12q14.1
		ArfGAP with GTPase domain, ankyrin repeat and PH domain 3	TC0700009693.hg.1	AGAP3		9.3716	8.10648	9.80955	9.39453	8.29869	8.18302	0.503106	8.39517	9.08699	8.81997	8.83509	9.08293	8.89287	8.71385	7.47313	7.23404	7.80993	8.33472	9.61697	9.09789	9.08353	9.24121	9.02596	9.19783	9.24226	9.12076	8.24321	9.30483	0.668581	0.884381	T	T	-2.08727	0.187521	0.53928	0.00191519	0.00220677	T	NM_001042535; NM_001281300; NM_001308304; NM_001308305; NM_031946; ENST00000335367; ENST00000397238; ENST00000461065; ENST00000463179; ENST00000463381; ENST00000467250; ENST00000467724; ENST00000468796; ENST00000469901; ENST00000473140; ENST00000473312; ENST00000473633; ENST00000475145; ENST00000476375; ENST00000478320; ENST00000479901; ENST00000480106; ENST00000483971; ENST00000485904; ENST00000…	chr7	+	Multiple_Complex	10	7q36.1
		ArfGAP with GTPase domain, ankyrin repeat and PH domain 4	TC1000010509.hg.1	AGAP4		10.0855	9.86344	9.56	10.6226	9.81359	10.0142	0.335561	9.85867	10.6734	12.1856	8.46047	8.25801	8.52447	8.15423	12.4135	12.3709	12.194	11.9955	8.01681	8.61655	8.24801	8.48638	9.40072	9.61561	10.0097	9.92759	10.0394	9.84357	0.421264	0.263779	T	T	1.14535	0.180132	0.531847	2.04e-14	1.2e-13	T	NM_001276343; NM_001291379; NM_133446; OTTHUMT00000047799; OTTHUMT00000047800; OTTHUMT00000047801; OTTHUMT00000047802; OTTHUMT00000047803	chr10	-	Multiple_Complex	10	10q11.22
		ArfGAP with GTPase domain, ankyrin repeat and PH domain 5	TC1000012567.hg.1	AGAP5		10.9734	10.4524	10.4233	10.8048	11.0218	10.7072	0.320452	12.1528	12.9985	13.2744	9.37018	9.13192	9.48148	8.83948	12.544	12.587	12.6855	12.7031	9.24147	9.77732	9.23086	9.745	9.73784	10.1254	10.7277	10.4852	10.8242	10.4384	0.160998	0.309534	T	T	1.30659	0.350758	0.698584	1.32e-13	6.5e-13	T	NM_001144000; ENST00000374094; ENST00000443782; ENST00000581191; ENST00000607663; ENST00000621690; OTTHUMT00000048673; OTTHUMT00000470448; OTTHUMT00000479260	chr10	-	Multiple_Complex	10	10q22.2
		ArfGAP with GTPase domain, ankyrin repeat and PH domain 6	TC1000007598.hg.1	AGAP6		10.4601	9.68752	9.80462	10.2331	10.0943	9.72838	0.909063	10.9486	12.622	12.4794	8.62798	9.27862	8.58369	8.51279	12.2548	12.2582	11.8779	12.2481	8.71105	8.68162	8.17666	8.74435	9.41161	9.75235	10.0409	9.9126	10.0685	9.74846	0.260726	0.416377	T	T	1.24836	0.888661	0.970736	1.09e-13	5.45e-13	T	NM_001077665; OTTHUMT00000048058; OTTHUMT00000476848	chr10	+	Multiple_Complex	10	10q11.23
		ArfGAP with GTPase domain, ankyrin repeat and PH domain 9; BMS1 ribosome biogenesis factor pseudogene 6	TC1000010555.hg.1	AGAP9; BMS1P6		10.8236	10.1212	10.4337	10.4319	10.5154	10.4152	0.980443	8.96916	9.05159	9.35648	10.4518	10.4604	10.3225	10.2637	11.655	11.7572	11.6172	12.0002	10.5186	10.2669	10.3327	10.6647	10.4403	10.0774	9.77287	9.90462	10.4239	10.4533	0.053703	0.35191	T	T	-1.0206	0.978538	0.994987	8.04e-10	1.91e-09	T	NM_001190810; NR_024495; ENST00000413193; ENST00000452145	chr10	-	Multiple_Complex	10	10q11.22
		Salzman2013 ANNOTATED, CDS, coding, INTERNAL, OVCODE, OVEXON best transcript NM_001190810; centaurin, gamma-like family, member 11 pseudogene [Source:HGNC Symbol;Acc:HGNC:23660]	TC1000007510.hg.1	AGAP9; CTGLF11P		9.65312	9.4624	9.61379	9.66688	10.1583	9.71994	0.177172	9.06887	9.30069	11.3266	8.09928	8.48653	7.9976	8.117	12.0895	12.0592	11.4426	11.8622	7.27207	8.14161	7.89365	8.32816	8.62651	9.03765	9.31012	9.73153	9.69449	9.61908	0.269707	0.100697	T	T	1.05366	0.324082	0.680045	1.81e-12	6.91e-12	T	hsa_circ_0018297; uc057szz.1	chr10	+	Multiple_Complex	10
		ATP/GTP binding protein-like 1	TC1500008202.hg.1	AGBL1		3.41127	3.87969	3.75726	4.35294	3.93318	3.95174	0.11311	3.71183	4.43548	3.55117	4.1521	4.05723	3.6004	3.95072	3.54092	3.61984	3.56621	3.86217	8.96358	9.29338	9.41243	9.49724	3.46097	3.64139	3.02487	3.35324	3.94284	3.73736	0.237172	0.242939	F	F	1.15307	0.0665747	0.327799	4.58e-19	1.28e-17	F	NM_152336; ENST00000421325; ENST00000441037; ENST00000567715; ENST00000568785; OTTHUMT00000314929; OTTHUMT00000420932; OTTHUMT00000420933	chr15	+	Multiple_Complex	10	15q25.3
		ATP/GTP binding protein-like 2	TC1100010760.hg.1	AGBL2		3.68669	3.65158	3.54259	4.20525	3.70805	4.31436	0.0790828	4.55557	3.92174	5.61487	3.8705	4.97629	3.69279	4.36327	9.45856	9.33391	9.75178	9.41652	4.48026	3.40265	3.09769	3.50003	4.54294	3.96242	3.90791	3.44781	4.24946	3.64773	0.323194	0.0751404	F	F	1.51754	0.183116	0.53464	1.06e-14	6.73e-14	F	NM_024783; ENST00000357610; ENST00000425363; ENST00000525123; ENST00000526331; ENST00000528244; ENST00000528609; ENST00000528632; ENST00000529154; ENST00000529712; ENST00000530577; ENST00000530969; ENST00000531835; ENST00000532595; ENST00000532835; BC036234; OTTHUMT00000383725; OTTHUMT00000383726; OTTHUMT00000383727; OTTHUMT00000383728; OTTHUMT00000383729; OTTHUMT00000383834; OTTHUMT00000383835; …	chr11	-	Multiple_Complex	10	11p11.2
		ATP/GTP binding protein-like 3	TC0700009240.hg.1	AGBL3		4.89173	4.80106	4.37568	4.70399	4.6552	4.41235	0.61706	4.00673	4.39606	5.2883	3.96399	4.76873	4.47244	4.70488	6.60503	6.42114	6.81042	5.8852	4.9809	4.03006	4.8587	4.57374	4.89631	5.52228	5.74443	5.59488	4.67859	4.84106	0.156211	0.275523	F	T	-1.1192	0.726342	0.913486	5.44e-07	8.83e-07	F	NM_178563; ENST00000275763; ENST00000435976; ENST00000436302; ENST00000455283; ENST00000470839; ENST00000476700; ENST00000494702; BC030651; OTTHUMT00000339931; OTTHUMT00000339932; OTTHUMT00000339933; OTTHUMT00000339934; OTTHUMT00000340213; OTTHUMT00000376655; OTTHUMT00000376656; uc011kpw.2	chr7	+	Multiple_Complex	10	7q33
		ATP/GTP binding protein-like 4	TC0100014133.hg.1	AGBL4		3.33105	3.32382	3.54758	5.68605	3.62398	4.18822	0.150913	4.20743	3.71665	4.00012	3.61133	3.55248	4.03348	3.6045	3.8305	3.45122	4.03651	3.39079	3.76587	3.3558	3.48901	3.38215	3.26823	3.49982	3.16098	3.21302	4.29181	3.32758	1.06568	0.127152	T	F	1.95101	0.00253597	0.0613206	0.0305423	0.0323444	F	NM_032785; ENST00000334103; ENST00000371836; ENST00000371838; ENST00000371839; ENST00000416121; ENST00000497451; BC126383; OTTHUMT00000021346; OTTHUMT00000022134; OTTHUMT00000022135; OTTHUMT00000022154; OTTHUMT00000022319	chr1	-	Multiple_Complex	10	1p33
		ATP/GTP binding protein-like 5	TC0200007050.hg.1	AGBL5		9.91818	10.3288	9.55925	9.46568	10.2199	10.0732	0.962977	8.88439	8.84385	9.50687	8.71173	8.43548	8.49362	8.09665	16.0643	16.0097	16.3	16.3221	7.69074	8.72082	8.40421	7.85837	9.09368	9.24856	9.07981	8.59904	10.1106	9.93166	0.399882	0.38509	T	T	1.13205	0.953298	0.989048	3.38e-19	9.9e-18	T	NM_001035507; NM_021831; NR_104246; ENST00000323064; ENST00000360131; ENST00000421915; ENST00000437006; ENST00000441931; ENST00000451003; ENST00000453161; ENST00000477136; ENST00000487078; ENST00000489683; BC007415; OTTHUMT00000250186; OTTHUMT00000309031; OTTHUMT00000309032; OTTHUMT00000309033; OTTHUMT00000309034; OTTHUMT00000324712; OTTHUMT00000324713; OTTHUMT00000324714; OTTHUMT00000324715; OTT…	chr2	+	Multiple_Complex	10	2p23.3
		advanced glycosylation end product-specific receptor	TC0600011482.hg.1	AGER		5.04727	5.34638	5.13265	5.56342	5.13402	5.05897	0.692853	6.21496	5.29741	5.84395	5.52915	5.52216	4.88073	4.84486	5.21456	4.8529	4.84901	5.06118	5.82918	6.13117	5.90678	5.81181	6.44984	5.93614	6.06309	6.62926	5.09802	5.14931	0.272178	0.154077	T	T	-1.03618	0.736021	0.917002	1.48e-05	2.07e-05	T	NM_001136; NM_001206932; NM_001206934; NM_001206936; NR_038190; ENST00000375055; ENST00000375056; ENST00000375065; ENST00000375067; ENST00000375069; ENST00000375070; ENST00000375076; ENST00000438221; ENST00000450110; ENST00000469940; ENST00000473619; ENST00000484849; ENST00000488669; ENST00000538695; ENST00000620802; BC020669; OTTHUMT00000076200; OTTHUMT00000076201; OTTHUMT00000076202; OTTHUMT000…	chr6	-	Multiple_Complex	10	6p21.3
		ArfGAP with FG repeats 1; microRNA 5703	TC0200010975.hg.1	AGFG1; MIR5703		10.5981	11.0273	10.717	10.3007	10.6606	11.2313	0.875792	9.2583	10.8332	10.7338	10.8329	10.9278	10.6617	10.5749	13.4406	13.6782	13.3795	13.3143	10.8827	10.7252	11.0887	11.1176	11.4374	11.5134	11.4782	11.7779	10.7082	10.7393	0.469286	0.221557	T	T	-1.02178	0.812303	0.945156	1.23e-12	4.84e-12	T	NM_001135187; NM_001135188; NM_001135189; NM_004504; NR_049888; ENST00000310078; ENST00000373671; ENST00000409171; ENST00000409315; ENST00000409979; ENST00000456594; ENST00000458212; ENST00000486932; ENST00000582757; BC030592; BC096272; BC096273; BC096274; BC096275; OTTHUMT00000256895; OTTHUMT00000331536; OTTHUMT00000331537; OTTHUMT00000331538; OTTHUMT00000331539; OTTHUMT00000331540; OTTHUMT00000…	chr2	+	Multiple_Complex	10	2q36.3
		ArfGAP with FG repeats 2	TC0700008552.hg.1	AGFG2		8.63484	9.15177	9.2263	7.70695	8.87587	8.80452	0.268032	9.26274	8.58091	9.90355	10.0027	10.0115	10.1706	9.63152	7.24199	7.25698	7.06742	7.2209	5.46749	6.3488	5.80495	5.43111	8.10278	7.71132	8.04396	8.35298	8.83874	9.18751	0.655251	0.322127	T	T	-1.27348	0.0635775	0.320199	1.79e-12	6.84e-12	T	NM_006076; ENST00000300176; ENST00000429987; ENST00000430857; ENST00000474713; ENST00000477022; BC017329; OTTHUMT00000342769; OTTHUMT00000342770; OTTHUMT00000342771; OTTHUMT00000342772; OTTHUMT00000342773	chr7	+	Multiple_Complex	10	7q22.1
		angiogenic factor with G-patch and FHA domains 1	TC0500007841.hg.1	AGGF1		9.61691	9.77405	9.74982	9.29787	10.1195	9.88557	0.838934	7.48057	7.22749	8.18465	9.26304	9.78067	9.71869	9.90842	10.1135	10.3486	10.0457	10.0451	9.02625	8.68812	8.93679	8.92178	9.47084	9.25077	9.30307	9.74645	9.84008	9.76144	0.42331	0.084602	T	T	1.05602	0.798386	0.939631	1.07e-09	2.49e-09	T	NM_018046; ENST00000312916; ENST00000502408; ENST00000503538; ENST00000506806; BC032844; OTTHUMT00000219971; OTTHUMT00000368923; OTTHUMT00000368924; OTTHUMT00000368925	chr5	+	Multiple_Complex	10	5q13.3
		acylglycerol kinase	TC0700009394.hg.1	AGK		9.58366	9.51168	9.60667	9.1465	9.23272	9.06942	0.00162963	5.82298	4.98501	4.99379	7.89927	8.07267	7.56382	8.25741	7.71131	7.02349	7.15361	6.96956	7.56968	7.38352	8.11042	7.39157	8.75085	8.39822	8.405	8.42719	9.1489	9.58126	0.0816929	0.0495545	T	T	-1.34944	0.0725671	0.341995	1.35e-13	6.62e-13	T	NM_018238; ENST00000355413; ENST00000465241; ENST00000473247; ENST00000473884; ENST00000492693; ENST00000494053; ENST00000494688; ENST00000495028; ENST00000496273; ENST00000496784; ENST00000629555; BC022777; OTTHUMT00000348969; OTTHUMT00000348970; OTTHUMT00000348971; OTTHUMT00000348972; OTTHUMT00000348973; OTTHUMT00000348974; OTTHUMT00000348975; OTTHUMT00000348976; OTTHUMT00000348977; OTTHUMT0000…	chr7	+	Multiple_Complex	10	7q34
		amylo-alpha-1, 6-glucosidase, 4-alpha-glucanotransferase	TC0100009191.hg.1	AGL		9.69292	9.02049	9.02475	8.51628	8.86585	8.89919	0.129355	7.14954	6.35005	6.34068	11.1339	11.4167	11.5772	11.3234	6.89019	7.27042	7.3929	6.91741	11.7181	11.7744	11.6161	11.4914	8.47466	7.92502	7.76842	8.2787	8.88184	9.02271	0.212105	0.387004	T	T	-1.10257	0.0379638	0.246518	1.86e-17	2.78e-16	T	NM_000028; NM_000642; NM_000643; NM_000644; NM_000645; NM_000646; ENST00000294724; ENST00000361302; ENST00000361522; ENST00000361915; ENST00000370161; ENST00000370163; ENST00000370165; ENST00000477753; BC078663; OTTHUMT00000029775; OTTHUMT00000029776; OTTHUMT00000029777; OTTHUMT00000029778; OTTHUMT00000029779; OTTHUMT00000029780; OTTHUMT00000029781	chr1	+	Multiple_Complex	10	1p21
		agmatinase	TC0100013003.hg.1	AGMAT		4.70658	5.38892	6.198	4.07907	4.72335	5.57758	0.355939	5.93784	6.49402	5.12189	11.9851	12.0384	12.028	12.0422	3.75266	4.52885	4.23298	4.86665	5.96899	6.32219	5.7831	6.67984	5.53188	5.73417	5.51018	5.74186	4.77524	5.42156	0.751702	0.746607	T	T	-1.56517	0.0789971	0.356826	4.38e-16	4.08e-15	T	NM_024758; ENST00000375826; BC005090; OTTHUMT00000006763	chr1	-	Coding	10	1p36.21
		alkylglycerol monooxygenase	TC0700010334.hg.1	AGMO		3.09785	3.29019	3.32688	4.07366	3.12023	3.13126	0.564041	4.02567	6.08114	4.38839	11.0863	10.8319	10.9195	10.9334	6.75605	6.90336	6.74369	7.06544	4.51593	4.25291	3.27977	3.83432	3.51503	3.68534	4.05325	3.68329	3.12597	3.30779	0.547307	0.123015	F	F	-1.13431	0.449725	0.769871	3.07e-19	9.09e-18	F	NM_001004320; ENST00000342526; ENST00000407277; ENST00000418075; ENST00000498264; BC108676; OTTHUMT00000326049; OTTHUMT00000326055; OTTHUMT00000326056; OTTHUMT00000326057; uc003stb.1	chr7	-	Multiple_Complex	10	7p21.2
		argonaute RISC catalytic component 1	TC0100007786.hg.1	AGO1		10.0286	10.1707	10.3688	9.88194	10.1235	10.3137	0.629684	9.43602	9.93329	10.2451	8.76972	8.56983	8.53085	8.94795	8.37694	8.2813	8.18156	7.86869	7.8457	7.7362	8.12465	7.54147	10.093	9.70598	9.98347	10.005	10.1106	10.1842	0.216383	0.170852	T	T	-1.05238	0.671852	0.891007	2.13e-12	8.04e-12	T	NM_012199; ENST00000373204; ENST00000373206; BC063275; OTTHUMT00000019336; OTTHUMT00000019337	chr1	+	Multiple_Complex	10	1p34.3
		argonaute RISC catalytic component 2	TC0800012474.hg.1	AGO2		7.67523	7.27542	8.27422	8.62371	7.78031	8.09533	0.326744	5.19155	7.17187	8.07436	7.6216	7.96258	7.82614	7.50537	7.00804	7.26072	7.60585	6.83791	10.8803	11.3519	11.3151	11.2967	9.89714	9.50759	9.25114	9.9047	8.14178	7.7217	0.426174	0.502699	T	T	1.338	0.123822	0.443362	5.91e-14	3.13e-13	T	NM_001164623; NM_012154; ENST00000517293; ENST00000518019; ENST00000519347; ENST00000519980; ENST00000520412; ENST00000520628; ENST00000521325; ENST00000523609; ENST00000524328; OTTHUMT00000377915; OTTHUMT00000377916; OTTHUMT00000377924; OTTHUMT00000377925; OTTHUMT00000377926; OTTHUMT00000377927; OTTHUMT00000377928; OTTHUMT00000377929; OTTHUMT00000377930	chr8	-	Multiple_Complex	10	8q24
		argonaute RISC catalytic component 3	TC0100007789.hg.1	AGO3		8.71432	8.62471	8.56914	9.74849	9.06806	8.86309	0.0947869	6.76931	9.16495	8.16763	8.35315	8.35575	8.07763	8.28628	8.75498	8.7308	8.90889	8.92347	8.78331	8.49332	8.91492	8.98704	9.30126	9.40503	9.1368	9.29002	9.07877	8.63232	0.463489	0.073252	T	T	1.36268	0.00625156	0.0964007	1.59e-07	2.75e-07	T	NM_024852; NM_177422; ENST00000246314; ENST00000324350; ENST00000373191; ENST00000397828; ENST00000471099; ENST00000491443; OTTHUMT00000019829; OTTHUMT00000019830; OTTHUMT00000019831; OTTHUMT00000091354; OTTHUMT00000091357; uc001bzn.1	chr1	+	Multiple_Complex	10	1p34
		argonaute RISC catalytic component 4	TC0100007784.hg.1	AGO4		5.79982	6.03545	5.34202	5.76275	6.43473	5.62686	0.539891	7.26875	6.13419	6.5787	6.38654	6.96918	6.2545	6.16748	7.37781	7.54918	7.13434	7.32632	7.28612	7.95927	7.754	7.45652	7.79006	7.67107	7.7322	8.21845	5.69777	5.75711	0.432565	0.352597	T	T	-1.042	0.402567	0.736837	2.18e-08	4.21e-08	T	NM_017629; ENST00000373210; ENST00000488778; ENST00000496257; BC152450; OTTHUMT00000012213; OTTHUMT00000091358; OTTHUMT00000091359	chr1	+	Multiple_Complex	10	1p34
		1-acylglycerol-3-phosphate O-acyltransferase 1; microRNA 6721	TC0600011481.hg.1	AGPAT1; MIR6721		10.5635	10.7258	10.9098	10.013	10.119	10.1848	0.00496192	7.98883	8.81515	9.98055	9.22278	9.1354	9.23237	9.38117	11.0938	11.0374	11.016	10.8156	8.14632	8.37561	8.25822	8.66839	9.4159	9.63	9.6357	9.74954	10.11	10.7315	0.0866628	0.173278	T	T	-1.53846	0.00109658	0.0398773	1.04e-13	5.21e-13	T	NM_006411; NM_032741; ENST00000336984; ENST00000375104; ENST00000375107; ENST00000395496; ENST00000395497; ENST00000395499; ENST00000476663; ENST00000490711; ENST00000617181; BC002402; BC003007; BC004310; BC090849; OTTHUMT00000076418; OTTHUMT00000076420; OTTHUMT00000076421; OTTHUMT00000076423; OTTHUMT00000076424; OTTHUMT00000076425; OTTHUMT00000268941; OTTHUMT00000268942	chr6	-	Multiple_Complex	10	6p21.3
		1-acylglycerol-3-phosphate O-acyltransferase 2	TC0900011992.hg.1	AGPAT2		6.83648	7.12554	7.18552	6.80073	7.06841	7.04723	0.605882	6.37994	6.74226	7.01136	11.7749	12.0836	12.0492	12.0076	6.93133	7.06923	6.90586	6.5967	8.0958	8.42079	8.41555	8.16618	8.48544	8.14986	8.33893	8.32061	7.05739	7.15346	0.148808	0.186629	T	T	-1.06886	0.661913	0.88735	2.37e-19	7.35e-18	T	NM_001012727; NM_006412; ENST00000371694; ENST00000371696; ENST00000470861; ENST00000472820; ENST00000538402; BC000026; BC004529; BC019292; OTTHUMT00000055090; OTTHUMT00000055091; OTTHUMT00000055092; OTTHUMT00000319124	chr9	-	Multiple_Complex	10	9q34.3
		1-acylglycerol-3-phosphate O-acyltransferase 3	TC2100007331.hg.1	AGPAT3		8.04684	8.01165	8.36182	6.96709	7.32759	8.0143	0.0975248	8.11777	6.45628	7.37549	10.4736	10.8079	10.4788	10.4771	8.80661	8.63869	8.78127	8.8559	8.28525	8.64834	8.42002	8.34296	9.50621	9.26622	9.20596	9.48974	7.39154	8.02996	0.532006	0.192817	T	T	-1.55663	0.00284272	0.065843	7.76e-13	3.19e-12	T	NM_001037553; NM_020132; ENST00000291572; ENST00000327505; ENST00000398058; ENST00000398061; ENST00000398063; ENST00000422850; ENST00000445582; ENST00000448287; ENST00000448845; ENST00000457068; ENST00000467358; ENST00000474735; ENST00000479117; ENST00000481319; ENST00000484865; ENST00000497909; ENST00000498670; ENST00000546158; BC011971; BC040603; BC063552; OTTHUMT00000195719; OTTHUMT00000195720…	chr21	+	Multiple_Complex	10	21q22.3
	#	1-acylglycerol-3-phosphate O-acyltransferase 4	TC0600013794.hg.1	AGPAT4		7.68678	4.26972	8.53366	7.73287	4.95343	4.96915	0.586011	4.92797	4.53648	5.27247	3.53122	3.05419	4.06588	4.09116	5.37117	5.30084	6.33749	5.43614	4.13993	5.45362	4.68532	5.2808	7.18782	6.24979	6.07264	6.83815	4.96161	7.86527	1.60019	2.25738	T	T	-7.48325	0.225567	0.583659	0.00573203	0.0063756	T	NM_020133; ENST00000320285; ENST00000366905; ENST00000366911; ENST00000436279; ENST00000437165; BC020209; OTTHUMT00000042983; OTTHUMT00000042984; OTTHUMT00000042985; OTTHUMT00000042986	chr6	-	Multiple_Complex	10	6q26
		Transcript Identified by AceView, Entrez Gene ID(s) 56895	TC0600013796.hg.1	AGPAT4		5.55575	6.21326	5.3904	6.13904	5.85236	5.8205	0.467118	6.0161	5.673	5.9191	5.4229	5.32799	5.71876	5.30771	4.62401	4.85235	5.15241	4.90042	6.25098	5.90212	5.42971	5.43464	5.5562	6.00753	5.53192	5.40103	5.83708	5.52487	0.175437	0.43527	T	T	1.24161	0.377811	0.719558	0.00370335	0.00417369	T	AGPAT4.tAug10-unspliced	chr6	-	Unassigned	6
		AGPAT4 intronic transcript 1	TC0600013797.hg.1	AGPAT4-IT1		5.55298	4.60576	4.98672	5.25071	4.81583	4.95481	0.898191	4.38063	4.91915	5.09418	4.85144	4.59477	4.64985	4.48522	5.07619	4.46862	4.70798	4.63339	5.17557	4.70514	4.48295	5.58569	5.02706	5.14102	4.81712	4.72042	4.98192	5.03014	0.222108	0.476621	T	T	-1.03399	0.874382	0.967063	0.464107	0.466368	T	NR_024277	chr6	-	NonCoding	10	6q26
		1-acylglycerol-3-phosphate O-acyltransferase 5	TC0800006566.hg.1	AGPAT5		10.2251	9.59375	10.4775	9.12087	9.24984	9.38113	0.0361175	5.32872	6.25905	6.64376	8.26391	8.84111	7.76424	8.02457	11.6999	11.6405	11.4873	11.4667	9.35974	9.19588	9.10962	8.76141	8.64128	8.71774	8.16343	8.56496	9.25046	10.1758	0.130132	0.455193	T	T	-1.89915	0.00250161	0.0610052	1.18e-14	7.39e-14	T	NM_018361; ENST00000285518; ENST00000518327; ENST00000523234; ENST00000523586; ENST00000530716; ENST00000533159; ENST00000533648; BC023550; BC080537; OTTHUMT00000374684; OTTHUMT00000374685; OTTHUMT00000374686; OTTHUMT00000374687; OTTHUMT00000381879; OTTHUMT00000381880; OTTHUMT00000381881	chr8	+	Multiple_Complex	10	8p23.1
		alkylglycerone phosphate synthase	TC0200010100.hg.1	AGPS		9.39278	9.4326	9.52499	9.31782	9.44248	9.54714	0.861586	8.10952	4.11664	6.45449	10.4922	10.1558	10.4434	10.377	9.2634	9.21952	9.62181	9.46202	9.84919	10.408	10.0208	10.3894	9.56083	9.42105	9.16979	9.30777	9.43734	9.44057	0.114806	0.0678245	T	T	-1.00224	0.937714	0.985066	3.52e-16	3.38e-15	T	NM_003659; ENST00000264167; ENST00000409888; ENST00000460342; BC141820; OTTHUMT00000255730; OTTHUMT00000334036; OTTHUMT00000334037	chr2	+	Multiple_Complex	10	2q31.2
		anterior gradient 2, protein disulphide isomerase family member	TC0700010355.hg.1	AGR2		3.83411	3.52417	3.39726	3.68207	3.399	3.28907	0.503024	6.67518	6.31808	5.08574	3.49676	3.8424	3.43906	3.84695	5.76041	4.93268	4.78275	4.89532	4.24672	3.88086	4.21377	3.77987	3.36881	3.35222	4.14289	3.40233	3.41994	3.54926	0.202757	0.224725	F	F	-1.09378	0.615022	0.862721	1.12e-09	2.6e-09	F	NM_006408; ENST00000401412; ENST00000412973; ENST00000419304; ENST00000450569; ENST00000468419; ENST00000486219; ENST00000489523; BC015503; OTTHUMT00000207594; OTTHUMT00000326381; OTTHUMT00000326382; OTTHUMT00000326383; OTTHUMT00000326384; OTTHUMT00000326385; OTTHUMT00000326386	chr7	-	Multiple_Complex	10	7p21.3
		anterior gradient 3, protein disulphide isomerase family member	TC0700010358.hg.1	AGR3		2.76703	3.06442	2.83241	3.33969	2.78841	3.38283	0.2529	4.62483	4.52297	3.67098	3.21697	2.82999	3.60829	3.31989	2.58714	2.32317	2.67416	3.17388	3.65069	2.74138	3.10302	2.94977	2.89369	3.12439	3.73858	2.85158	3.36038	2.83101	0.331438	0.156282	F	F	1.4433	0.31216	0.66932	0.000363595	0.000445495	F	NM_176813; ENST00000310398; ENST00000402239; ENST00000414935; ENST00000486448; BC058284; OTTHUMT00000250191; OTTHUMT00000326288; OTTHUMT00000326289; OTTHUMT00000326290	chr7	-	Multiple_Complex	10	7p21.1
		agrin	TC0100006486.hg.1	AGRN		4.57586	5.11607	4.49528	4.91476	5.17895	4.53885	0.610694	6.97261	5.967	6.35765	6.42868	7.16741	7.2787	6.50859	6.55826	5.72438	5.95844	5.44228	4.984	5.46624	5.21319	5.76731	6.58389	6.2701	6.47987	6.83552	4.888	4.53721	0.321671	0.337565	F	F	1.27526	0.611274	0.860716	2.42e-07	4.09e-07	F	NM_001305275; NM_198576; ENST00000379370; ENST00000419249; ENST00000461111; ENST00000466223; ENST00000469403; ENST00000477585; ENST00000478677; ENST00000479707; ENST00000492947; ENST00000620552; OTTHUMT00000097990; OTTHUMT00000097991; OTTHUMT00000097992; OTTHUMT00000097993; OTTHUMT00000097994; OTTHUMT00000097995; OTTHUMT00000097996; OTTHUMT00000097997; OTTHUMT00000099680	chr1	+	Multiple_Complex	10	1p36.33
		agouti related neuropeptide	TC1600010636.hg.1	AGRP		4.62181	4.95443	4.94129	5.25265	5.44102	4.51925	0.484841	5.84094	6.07517	6.26564	5.13667	4.67771	4.67894	4.62919	4.8607	4.85199	4.75698	4.3027	5.21968	4.15998	3.60041	4.16827	3.68722	4.08167	4.15089	4.36073	5.28148	4.94759	0.487001	0.18836	T	T	1.26041	0.455437	0.772495	8.28e-05	0.000107493	T	NM_001138; ENST00000290953; BC110443; OTTHUMT00000268828; uc002etg.1	chr16	-	Coding	10	16q22
		angiotensinogen (serpin peptidase inhibitor, clade A, member 8)	TC0100018565.hg.1	AGT		8.23807	5.27901	7.66284	7.34589	6.48441	6.03107	0.678382	7.40763	8.65749	7.4598	19.2461	19.2472	19.1882	19.0915	7.07703	7.56717	7.80537	6.88744	10.8174	10.9409	11.2563	11.0691	4.95624	7.86446	4.30756	4.46264	6.5646	7.80963	0.667884	1.56895	T	T	-2.37023	0.523894	0.811769	2.19e-15	1.68e-14	T	NM_000029; ENST00000366667; BC011519; OTTHUMT00000092102	chr1	-	Multiple_Complex	10	1q42.2
		ATP/GTP binding protein 1	TC0900010607.hg.1	AGTPBP1		6.32105	5.86672	6.00599	7.00636	6.01249	5.9262	0.537414	5.08559	4.26464	4.1402	6.33523	5.98105	6.62366	6.64202	8.56285	8.45205	8.27619	8.57975	8.0864	8.29734	7.72875	7.61148	8.44764	7.77707	7.86158	8.33553	5.9711	6.03377	0.600274	0.232764	T	T	-1.04439	0.359212	0.706339	2.51e-12	9.33e-12	T	NM_001286715; NM_001286717; NM_015239; ENST00000337006; ENST00000357081; ENST00000376080; ENST00000376081; ENST00000376083; ENST00000489265; ENST00000491784; ENST00000628899; BC060815; OTTHUMT00000052890; OTTHUMT00000052891; OTTHUMT00000052892; OTTHUMT00000052893; OTTHUMT00000052894; OTTHUMT00000052895; OTTHUMT00000482951	chr9	-	Multiple_Complex	10	9q21.33
		angiotensin II receptor, type 1	TC0300009119.hg.1	AGTR1		14.1937	14.3898	14.5913	12.9572	14.4965	14.5025	0.483668	12.0055	12.3634	12.3418	13.6236	13.7251	13.6642	13.3569	6.36161	6.56128	6.58845	6.49428	9.85423	9.59475	9.78696	9.74445	7.53652	7.82327	7.8518	7.99286	14.4994	14.3912	0.890473	0.198791	T	T	1.07785	0.151353	0.4883	6.66e-20	2.62e-18	T	NM_000685; NM_004835; NM_009585; NM_031850; NM_032049; ENST00000349243; ENST00000402260; ENST00000404754; ENST00000418473; ENST00000461609; ENST00000474935; ENST00000475166; ENST00000475347; ENST00000497524; BC022447; BC068494; OTTHUMT00000355806; OTTHUMT00000355807; OTTHUMT00000355808; OTTHUMT00000355809; OTTHUMT00000355810; OTTHUMT00000355811; OTTHUMT00000355812; uc003ewi.3	chr3	+	Multiple_Complex	10	3q24
		angiotensin II receptor, type 2	TC0X00008207.hg.1	AGTR2		3.82159	4.13875	3.43837	5.7068	3.77426	6.00884	0.134592	7.64582	5.90127	4.89896	3.80312	4.37349	3.50339	4.21697	3.44713	3.03906	3.72687	3.50237	4.17421	4.64617	3.94747	4.04798	3.69933	4.33091	4.10581	4.19317	5.85166	3.80468	1.21239	0.350709	T	F	4.13239	0.0018533	0.0517573	2.37e-06	3.59e-06	F	NM_000686; ENST00000371906; BC095504; OTTHUMT00000057984	chrX	+	Multiple_Complex	10	Xq22-q23
		angiotensin II receptor-associated protein	TC0100006865.hg.1	AGTRAP		6.82995	6.95329	6.35606	6.37038	6.17791	6.84829	0.410914	7.15917	6.79553	7.80794	6.43345	6.61684	6.86841	5.73375	7.38329	7.53477	7.76155	7.93123	8.69687	8.96803	9.22088	8.90528	9.61374	9.73043	9.69194	9.09369	6.4081	6.84628	0.34517	0.315296	T	T	-1.35489	0.355866	0.703143	1.11e-11	3.61e-11	T	NM_001040194; NM_001040195; NM_001040196; NM_001040197; NM_020350; ENST00000314340; ENST00000376627; ENST00000376629; ENST00000376637; ENST00000400895; ENST00000452018; ENST00000471765; ENST00000476309; ENST00000476512; ENST00000491346; ENST00000494437; ENST00000510878; ENST00000513739; ENST00000514733; BC017328; OTTHUMT00000006335; OTTHUMT00000006336; OTTHUMT00000006337; OTTHUMT00000006338; OTTH…	chr1	+	Multiple_Complex	10	1p36.22
		alanine-glyoxylate aminotransferase	TC0200011376.hg.1	AGXT		7.56976	7.55639	7.13585	7.92928	7.58619	7.54266	0.230372	6.73525	7.62482	7.09528	17.5129	17.7038	17.4975	17.5238	7.13007	7.59128	7.69814	7.30275	8.17255	7.61755	7.62877	7.63306	8.44483	8.55921	7.80142	7.62191	7.56531	7.5628	0.21177	0.246749	T	T	1.00174	0.276559	0.636032	3.17e-23	6.13e-21	T	NM_000030; ENST00000307503; ENST00000470255; ENST00000472436; ENST00000476698; BC132819; OTTHUMT00000257186; OTTHUMT00000324431; OTTHUMT00000324432; OTTHUMT00000324433	chr2	+	Multiple_Complex	10	2q37.3
		alanine--glyoxylate aminotransferase 2	TC0500010478.hg.1	AGXT2		4.57886	3.93876	4.38522	4.25744	3.95391	4.16782	0.452236	6.79066	5.452	4.64593	10.4159	10.4399	10.2384	9.99898	4.01927	3.9329	4.11147	4.06813	5.63405	5.65004	4.95574	4.87808	4.60364	4.29639	4.3577	4.353	4.14996	4.34652	0.155948	0.328266	T	F	-1.14596	0.42891	0.756279	4.23e-19	1.19e-17	F	NM_001306173; NM_031900; ENST00000231420; ENST00000505349; ENST00000505542; ENST00000510428; ENST00000512135; ENST00000618015; BC144268; BC150603; OTTHUMT00000207574; OTTHUMT00000366813; OTTHUMT00000366815; OTTHUMT00000366816; OTTHUMT00000366817	chr5	-	Multiple_Complex	10	5p13
		AT hook containing transcription factor 1	TC0100018080.hg.1	AHCTF1		10.3373	9.55184	10.2306	8.98321	9.54645	9.38942	0.0694276	8.95399	9.95745	10.0783	8.82178	8.90063	8.59502	9.29391	13.3918	13.5638	13.4726	13.3182	10.3887	10.1708	10.2792	10.2733	10.1016	10.0069	10.0118	10.1386	9.35965	10.2818	0.290661	0.42603	T	T	-1.89488	0.00180455	0.0510016	9.74e-16	8.28e-15	T	NM_015446; ENST00000326225; ENST00000366508; ENST00000470300; ENST00000477526; ENST00000478568; ENST00000483900; ENST00000498601; OTTHUMT00000097817; OTTHUMT00000097818; OTTHUMT00000097819; OTTHUMT00000097820; OTTHUMT00000357437; OTTHUMT00000357438; OTTHUMT00000357439	chr1	-	Multiple_Complex	10	1q44
		adenosylhomocysteinase	TC2000008915.hg.1	AHCY		10.5111	10.0738	10.7383	9.70453	9.86047	9.75385	0.0289746	7.02926	6.96192	6.41539	10.631	10.395	10.6897	10.6508	10.6542	10.5914	10.8318	10.5028	10.3118	10.5481	10.5935	10.3116	9.39352	9.36482	9.35238	9.24716	9.76355	10.4703	0.0797053	0.337743	T	T	-1.63217	0.000866446	0.0351961	1.2e-15	9.94e-15	T	NM_000687; NM_001161766; ENST00000217426; ENST00000468908; ENST00000473516; ENST00000480653; ENST00000538132; ENST00000606061; BC010018; BC011606; BC114924; OTTHUMT00000078772; OTTHUMT00000078773; OTTHUMT00000078775; OTTHUMT00000078776; OTTHUMT00000470304; OTTHUMT00000470305	chr20	-	Multiple_Complex	10	20q11.22
		adenosylhomocysteinase like 1	TC0100009365.hg.1	AHCYL1		12.914	13.4533	13.1396	12.9151	13.3559	13.6054	0.654715	12.104	12.0094	11.8538	12.5157	12.6406	12.8112	12.5526	11.4199	11.4622	11.8813	11.6178	12.0679	12.4867	12.5084	12.3318	12.117	12.2404	12.0178	11.9542	13.3159	13.161	0.349542	0.270821	T	T	1.11335	0.541949	0.821059	9.62e-08	1.71e-07	T	NM_001242673; NM_001242674; NM_001242675; NM_001242676; NM_006621; ENST00000359172; ENST00000369799; ENST00000393614; ENST00000469401; ENST00000475081; ENST00000481423; BC007576; BC010681; BC016942; BC065254; BC095476; BC110896; OTTHUMT00000032243; OTTHUMT00000032244; OTTHUMT00000032245; OTTHUMT00000032246; OTTHUMT00000092920	chr1	+	Multiple_Complex	10	1p13.2
		adenosylhomocysteinase-like 2	TC0700009083.hg.1	AHCYL2		8.10213	7.71438	7.62584	8.0172	7.98082	7.65238	0.729121	8.14907	6.81348	6.20044	7.39547	7.70337	7.1929	7.69224	7.30295	7.90748	7.9172	7.79081	8.23297	8.37946	8.27106	8.3874	6.88902	6.68754	6.63223	6.86573	7.99827	7.68375	0.200952	0.253325	T	T	1.24359	0.727362	0.913713	5.66e-08	1.04e-07	T	NM_001130720; NM_001130722; NM_001130723; NM_015328; ENST00000325006; ENST00000446544; ENST00000460109; ENST00000461161; ENST00000466924; ENST00000466993; ENST00000472554; ENST00000474594; ENST00000477028; ENST00000490911; ENST00000491079; ENST00000492628; BC008349; BC024325; OTTHUMT00000349380; OTTHUMT00000349381; OTTHUMT00000349382; OTTHUMT00000349383; OTTHUMT00000349384; OTTHUMT00000349411; OT…	chr7	+	Multiple_Complex	10	7q32.1
		AT hook, DNA binding motif, containing 1	TC0100013437.hg.1	AHDC1		7.94532	8.07257	8.62498	7.52911	8.05154	7.91323	0.215663	6.9898	7.74347	8.93431	5.57858	5.20216	5.57777	5.14123	6.30306	6.62001	6.44582	6.28651	5.65263	6.53373	6.35781	5.97214	7.17162	7.43662	7.00504	7.20302	7.8898	8.03033	0.270682	0.361314	T	T	-1.10231	0.111604	0.422687	1.9e-11	5.95e-11	T	NM_001029882; ENST00000247087; ENST00000374011; ENST00000480033; ENST00000487743; ENST00000490295; OTTHUMT00000009523; OTTHUMT00000009766; OTTHUMT00000009767; OTTHUMT00000009769	chr1	-	Multiple_Complex	10	1p36.13
		Abelson helper integration site 1	TC0600013258.hg.1	AHI1		9.00917	8.67964	8.5315	9.88725	9.05278	8.79003	0.234276	7.53241	10.0377	10.0588	5.94078	6.49122	6.51938	6.2786	10.2185	10.0827	9.82805	10.124	8.19138	7.91388	7.93738	7.35913	7.37588	6.9945	7.25502	7.44321	9.07687	8.70907	0.572898	0.244508	T	T	1.29038	0.058978	0.308376	5.27e-13	2.26e-12	T	NM_001134830; NM_001134831; NM_001134832; NM_017651; ENST00000265602; ENST00000327035; ENST00000367799; ENST00000367800; ENST00000457866; ENST00000475846; ENST00000487135; ENST00000488690; ENST00000498558; ENST00000524469; ENST00000527681; ENST00000528103; ENST00000529865; ENST00000531527; ENST00000531788; ENST00000533029; ENST00000534469; BC094800; OTTHUMT00000042353; OTTHUMT00000042354; OTTHUMT…	chr6	-	Multiple_Complex	10	6q23.3
		AHNAK nucleoprotein	TC1100011083.hg.1	AHNAK		8.90468	9.60001	7.84264	10.0033	10.1616	9.73435	0.0875476	6.10757	6.18074	6.12066	9.91957	10.2598	9.96686	10.0428	9.58458	8.99943	9.24426	8.87045	12.7777	13.4705	13.6988	13.427	10.5653	10.2425	10.3913	10.2127	9.97943	8.82002	0.216	0.885039	T	T	2.23365	0.000838118	0.0346974	6.52e-15	4.35e-14	T	NM_001620; NM_024060; ENST00000257247; ENST00000378024; ENST00000525875; ENST00000528508; ENST00000530124; ENST00000530285; ENST00000531324; ENST00000533365; OTTHUMT00000395014; OTTHUMT00000395570; OTTHUMT00000395571; OTTHUMT00000395572; OTTHUMT00000395574; OTTHUMT00000395575; OTTHUMT00000395576; OTTHUMT00000395686	chr11	-	Multiple_Complex	10	11q12.2
		AHNAK nucleoprotein 2	TC1400010390.hg.1	AHNAK2		5.20542	4.35903	4.93798	5.57817	5.06086	4.98489	0.296541	4.46893	5.05793	4.19918	7.63246	7.8362	7.67211	7.73947	7.7654	7.45233	7.2952	7.74817	7.01432	6.80131	7.20177	6.95862	4.54885	5.34439	4.89761	4.59309	5.02442	4.88539	0.322842	0.432644	T	F	1.10117	0.12405	0.443661	1.07e-13	5.37e-13	F	NM_138420; ENST00000333244; ENST00000555122; ENST00000555544; ENST00000557457; OTTHUMT00000410298; OTTHUMT00000410299; OTTHUMT00000410300; OTTHUMT00000410301; uc021seo.1	chr14	-	Multiple_Complex	10	14q32.33
		aryl hydrocarbon receptor	TC0700006795.hg.1	AHR		13.258	13.4262	12.9839	13.2253	13.2872	13.6125	0.43615	11.14	11.1042	11.7464	12.1349	12.302	12.1757	12.1848	11.196	10.8825	11.0326	10.8606	10.7906	10.718	10.8738	10.7808	14.0723	13.9085	14.0347	14.0479	13.2575	13.2345	0.208	0.223269	T	T	1.01606	0.35804	0.704776	2.37e-16	2.38e-15	T	NM_001621; ENST00000242057; ENST00000463496; ENST00000475440; ENST00000481944; ENST00000492120; BC069390; BC070080; OTTHUMT00000250200; OTTHUMT00000314620; OTTHUMT00000314624; OTTHUMT00000314625; OTTHUMT00000314626	chr7	+	Multiple_Complex	10	7p15
		aryl-hydrocarbon receptor repressor; programmed cell death 6	TC0500013140.hg.1	AHRR; PDCD6		8.10554	7.02716	8.2225	7.94475	7.65102	7.15474	0.673967	5.99811	5.90198	4.96698	7.77481	7.6203	7.30844	7.65205	8.70811	9.21892	9.1998	8.92966	8.78018	7.70127	7.5644	8.02485	8.41507	7.83675	8.54208	8.12204	7.60715	8.16164	0.399309	0.658966	T	T	-1.46864	0.524302	0.812093	3.05e-08	5.79e-08	T	NM_001242412; NM_020731; ENST00000316418; ENST00000504625; ENST00000505113; ENST00000506456; ENST00000507048; ENST00000510400; ENST00000510910; ENST00000511482; ENST00000511487; ENST00000512466; ENST00000512529; ENST00000514523; ENST00000515206; BC151852; BC152406; OTTHUMT00000367647; OTTHUMT00000367692; OTTHUMT00000367719; OTTHUMT00000367720; OTTHUMT00000367721; OTTHUMT00000367722; OTTHUMT000003…	chr5	+	Multiple_Complex	10	5p15.3; 5p15.33
		AHA1, activator of heat shock 90kDa protein ATPase homolog 1 (yeast)	TC1400007761.hg.1	AHSA1		13.7841	14.0547	14.2092	13.4848	13.5782	14.0122	0.188131	10.0765	11.3124	12.6915	12.9483	13.0586	12.9758	13.0433	14.3155	14.0614	13.7931	14.0936	13.7898	13.7776	14.2176	14.107	12.0894	12.1092	12.0838	12.4139	13.5381	14.0302	0.281479	0.215188	T	T	-1.40656	0.101034	0.404182	2.6e-13	1.19e-12	T	NM_012111; ENST00000216479; ENST00000535854; ENST00000553374; ENST00000554156; ENST00000555133; ENST00000555457; ENST00000555473; ENST00000555517; ENST00000555729; ENST00000556369; ENST00000556866; ENST00000556963; ENST00000557476; BC000321; OTTHUMT00000414016; OTTHUMT00000414017; OTTHUMT00000414018; OTTHUMT00000414019; OTTHUMT00000414020; OTTHUMT00000414021; OTTHUMT00000414022; OTTHUMT0000041402…	chr14	+	Multiple_Complex	10	14q24
		AHA1, activator of heat shock 90kDa protein ATPase homolog 2 (yeast)	TC0200007717.hg.1	AHSA2		9.35435	8.2351	7.1333	9.35053	9.2533	8.84073	0.241184	7.48249	10.3955	10.109	6.6887	6.31487	6.17341	6.56636	8.07818	8.52874	8.56283	8.29189	8.86661	7.8872	8.33933	8.20691	9.08695	8.59835	8.71902	8.82751	9.28192	8.2398	0.270667	1.11054	T	T	2.05926	0.017034	0.16457	7.55e-08	1.36e-07	T	NM_152392; ENST00000357022; ENST00000394457; ENST00000410073; ENST00000463681; ENST00000471542; ENST00000484217; ENST00000487904; ENST00000489653; ENST00000491217; ENST00000493310; ENST00000493628; BC113671; BC117278; OTTHUMT00000251598; OTTHUMT00000251599; OTTHUMT00000325689; OTTHUMT00000325691; OTTHUMT00000325707; OTTHUMT00000325736; OTTHUMT00000325737; OTTHUMT00000325738; OTTHUMT00000325739; O…	chr2	+	Multiple_Complex	10	2p15
		alpha-2-HS-glycoprotein	TC0300009772.hg.1	AHSG		4.38529	4.90631	4.41879	4.3653	4.43455	4.21055	0.266676	4.14488	4.94688	4.38409	17.8494	17.9233	17.909	17.9538	5.37305	5.00418	4.92153	4.59403	5.53213	4.47366	4.88499	3.96734	4.56658	4.99567	4.46081	4.0251	4.35152	4.40272	0.114687	0.291622	F	F	-1.03613	0.434836	0.758683	5.61e-24	1.52e-21	F	NM_001622; ENST00000273784; ENST00000411641; ENST00000478441; BC048198; BC052590; OTTHUMT00000344761; OTTHUMT00000344762; OTTHUMT00000344763	chr3	+	Multiple_Complex	10	3q27
		alpha hemoglobin stabilizing protein	TC1600007541.hg.1	AHSP		3.20117	2.90125	2.79601	3.36927	2.99278	2.65805	0.873282	3.35659	3.44454	2.91154	3.34022	3.14117	3.57649	2.99721	2.8442	2.61487	2.88788	2.56379	3.02573	2.98301	2.81434	2.85539	2.80164	2.76813	2.66894	2.61617	3.00371	2.91797	0.355814	0.210231	F	F	1.06123	0.83515	0.954222	0.0273185	0.029015	F	NM_016633; ENST00000302312; ENST00000564707; ENST00000569954; BC035842; OTTHUMT00000255624; OTTHUMT00000432895; OTTHUMT00000432896	chr16	+	Multiple_Complex	10	16p11.2
		activation-induced cytidine deaminase	TC1200009831.hg.1	AICDA		3.68824	4.36006	3.2172	3.77445	3.60326	3.82162	0.951127	5.65267	6.6987	4.50114	3.73887	4.82138	4.05524	3.71576	3.26157	3.82195	3.49448	3.46116	3.77624	3.71285	4.1073	3.92364	4.31497	3.88671	3.91133	3.48968	3.77682	3.73627	0.1149	0.574362	F	F	1.0285	0.938348	0.985258	1.46e-06	2.27e-06	F	NM_020661; ENST00000229335; ENST00000537228; ENST00000543081; ENST00000544516; ENST00000545512; ENST00000545576; BC006296; OTTHUMT00000400575; OTTHUMT00000400576; OTTHUMT00000400577; OTTHUMT00000400578; OTTHUMT00000400579; OTTHUMT00000400580	chr12	-	Multiple_Complex	10	12p13
		axin interactor, dorsalization associated	TC0100018562.hg.1	AIDA		10.627	10.9099	10.9685	11.1119	11.0002	11.0348	0.124968	7.92688	9.18245	8.68361	10.0747	10.5704	10.148	10.1567	11.3159	11.0149	11.0262	11.0346	10.2944	10.3922	10.7466	10.0455	11.2246	11.1411	10.989	11.1866	11.0417	10.9372	0.0571422	0.182608	T	T	1.07515	0.261429	0.620669	2.21e-11	6.84e-11	T	NM_022831; ENST00000340020; ENST00000355727; ENST00000470437; ENST00000474863; ENST00000495670; ENST00000497112; BC015535; OTTHUMT00000091818; OTTHUMT00000091819; OTTHUMT00000091820; OTTHUMT00000091821; OTTHUMT00000091822; OTTHUMT00000091823; uc001hno.3	chr1	-	Multiple_Complex	10	1q41
		allograft inflammatory factor 1	TC0600007598.hg.1	AIF1		11.7433	12.5369	11.364	12.3797	12.5477	12.9363	0.12545	9.1148	11.0505	11.4552	12.8374	12.8669	12.7456	13.0233	8.8361	8.8559	8.94092	9.04375	11.4271	11.2892	11.9446	11.7294	17.7818	17.592	17.5052	17.92	12.5813	11.8165	0.285499	0.598527	T	T	1.69918	0.00503825	0.0866993	3.16e-20	1.41e-18	T	NM_004847; NM_032955; ENST00000337917; ENST00000376049; ENST00000376059; ENST00000466820; ENST00000497362; BC009474; OTTHUMT00000076512; OTTHUMT00000076514; OTTHUMT00000076515; OTTHUMT00000076517; OTTHUMT00000259316	chr6	+	Multiple_Complex	10	6p21.3
		allograft inflammatory factor 1-like	TC0900008982.hg.1	AIF1L		6.79657	6.1829	7.2158	6.77777	6.59402	6.32419	0.638146	7.31629	6.91682	7.12989	6.81862	6.34222	5.97905	6.55145	6.22776	5.76234	6.14024	5.4184	6.20504	6.74924	7.49934	6.88467	9.01668	8.60677	8.43219	9.01408	6.57372	6.75065	0.228147	0.519491	T	T	-1.13047	0.591478	0.851036	6.19e-08	1.13e-07	T	NM_001185095; NM_001185096; NM_031426; NR_033701; ENST00000247291; ENST00000372297; ENST00000372298; ENST00000372300; ENST00000372301; ENST00000372302; ENST00000372309; ENST00000372314; ENST00000472942; ENST00000478257; BC021253; OTTHUMT00000054703; OTTHUMT00000054704; OTTHUMT00000054705; OTTHUMT00000054706; OTTHUMT00000054707; OTTHUMT00000054708; OTTHUMT00000054709; OTTHUMT00000054711; OTTHUMT00…	chr9	+	Multiple_Complex	10	9q34.13-q34.3
		apoptosis-inducing factor, mitochondrion-associated, 1	TC0X00010803.hg.1	AIFM1		8.92519	9.15956	9.39568	8.18946	8.76411	8.87756	0.0951329	5.7163	7.90281	7.74735	9.84306	10.0204	9.79532	9.69086	7.31759	7.12373	7.30314	7.54362	7.47106	7.77182	7.96835	8.28555	6.70397	6.18685	6.91768	6.93101	8.81852	9.16003	0.368912	0.235246	T	T	-1.26708	0.0276699	0.210802	1.89e-12	7.17e-12	T	NM_001130846; NM_001130847; NM_004208; NM_145812; ENST00000287295; ENST00000319908; ENST00000346424; ENST00000416073; ENST00000460436; ENST00000527892; ENST00000529877; ENST00000533719; ENST00000535724; BC111065; BC139738; OTTHUMT00000058247; OTTHUMT00000058248; OTTHUMT00000058249; OTTHUMT00000058250; OTTHUMT00000378485; OTTHUMT00000385802; OTTHUMT00000385804; OTTHUMT00000385805	chrX	-	Multiple_Complex	10	Xq26.1
		Memczak2013 ANTISENSE, coding, INTERNAL, intronic best transcript NM_001198696	TC1000007914.hg.1	AIFM2		4.66448	4.84546	5.21125	5.7782	5.20969	4.50667	0.555654	5.55611	5.18696	5.87923	4.8374	5.5374	5.09388	5.04518	3.72401	4.58572	4.64091	4.41304	6.56562	5.7411	5.41829	6.40581	5.01244	4.50865	4.77887	4.84362	5.17554	4.8795	0.63695	0.278542	T	T	1.22777	0.424568	0.752822	0.00041304	0.000503289	T	hsa_circ_0000243	chr10	+	NonCoding	6
		apoptosis-inducing factor, mitochondrion-associated, 2	TC1000010909.hg.1	AIFM2		4.98882	5.60613	4.92184	5.3024	5.22575	5.6949	0.419391	5.08018	5.19692	4.73665	7.18961	7.91331	7.0291	7.39577	3.80042	3.47382	3.20214	3.65418	6.81544	6.8431	6.61534	7.21091	5.17067	4.21953	4.74233	4.57265	5.26564	4.9567	0.251672	0.377229	T	T	1.2388	0.377503	0.719412	1.87e-12	7.12e-12	T	NM_001198696; NM_032797; ENST00000307864; ENST00000373248; ENST00000482166; ENST00000613322; BC006121; BC023601; OTTHUMT00000048487; OTTHUMT00000048488; OTTHUMT00000048489	chr10	-	Multiple_Complex	10	10q22.1
		apoptosis-inducing factor, mitochondrion-associated, 3	TC2200009195.hg.1	AIFM3		6.11217	5.49462	5.29029	5.6724	5.79514	5.69197	0.744023	9.88038	9.02151	8.98907	5.54071	5.27102	5.0244	5.54894	5.67855	5.45752	4.87192	5.35573	5.69629	5.93805	5.33114	5.6813	5.25097	5.44905	5.75295	5.22335	5.68258	5.52063	0.0659445	0.427903	T	T	1.1188	0.713848	0.908639	3.62e-13	1.6e-12	T	NM_001018060; NM_001146288; NM_144704; NR_027464; ENST00000399163; ENST00000399167; ENST00000405089; ENST00000417515; ENST00000426113; ENST00000434714; ENST00000440238; ENST00000441376; ENST00000465606; ENST00000467926; ENST00000468124; ENST00000472575; ENST00000479523; ENST00000483107; ENST00000484206; ENST00000486003; ENST00000495869; ENST00000496097; BC032485; OTTHUMT00000320149; OTTHUMT000003…	chr22	+	Multiple_Complex	10	22q11.21
		androgen-induced 1	TC0600009683.hg.1	AIG1		11.0527	11.3869	11.2122	10.8736	11.1432	10.9818	0.154661	7.48593	9.18774	9.56751	13.4853	13.3325	13.2028	13.3406	9.44194	9.0928	9.75837	9.46655	9.03561	7.91369	8.33621	8.62595	10.6903	10.5072	10.7338	10.586	10.9942	11.2162	0.135629	0.167177	T	T	-1.16635	0.335471	0.689165	2.92e-16	2.87e-15	T	NM_001286587; NM_001286588; NM_001286589; NM_016108; ENST00000275235; ENST00000344492; ENST00000357847; ENST00000367596; ENST00000367601; ENST00000447498; ENST00000458219; ENST00000470265; ENST00000494282; ENST00000629020; BC025278; OTTHUMT00000042506; OTTHUMT00000042507; OTTHUMT00000042508; OTTHUMT00000042509; OTTHUMT00000042510; OTTHUMT00000042511; OTTHUMT00000042512; OTTHUMT00000042513; OTTHUM…	chr6	+	Multiple_Complex	10	6q24.2
		absent in melanoma 1	TC0600008981.hg.1	AIM1		5.19032	5.17187	5.02165	4.76429	4.43862	5.33064	0.346726	4.36449	5.38436	5.79498	7.34589	7.29891	7.21783	7.35943	6.92558	7.23612	7.45749	7.19841	5.993	6.67981	6.24314	6.48882	9.41061	9.38206	9.6299	9.77798	4.81532	5.18072	0.451389	0.0925168	T	T	-1.28824	0.198669	0.551433	3.77e-16	3.59e-15	T	NM_001624; ENST00000369066; ENST00000457437; ENST00000487681; ENST00000633556; OTTHUMT00000041669; OTTHUMT00000041670; OTTHUMT00000041671	chr6	+	Multiple_Complex	10	6q21
		absent in melanoma 1-like	TC0100013382.hg.1	AIM1L		5.05004	5.37726	4.90341	4.59198	5.19415	4.6042	0.266785	6.2607	5.78242	6.65677	4.8145	4.5094	5.0463	4.96728	4.66837	4.71586	4.73498	4.65653	4.81353	4.37648	4.62767	4.96521	5.02593	4.52718	5.34756	4.76075	4.59834	5.0792	0.34419	0.242593	F	T	-1.39557	0.174758	0.524667	8.27e-06	1.18e-05	F	NM_001039775; ENST00000308182; ENST00000374207; ENST00000374208; ENST00000374211; ENST00000429942; ENST00000475866; ENST00000520372; ENST00000522923; ENST00000522993; ENST00000527815; BC136870; OTTHUMT00000009703; OTTHUMT00000009790; OTTHUMT00000009791; OTTHUMT00000009792; OTTHUMT00000096878; OTTHUMT00000381701; OTTHUMT00000381702; OTTHUMT00000381703; OTTHUMT00000381704; uc001bmd.4	chr1	-	Multiple_Complex	10	1p36.11
		absent in melanoma 2	TC0100016086.hg.1	AIM2		4.6142	5.36806	5.04105	5.18995	5.69905	5.26398	0.235465	6.30569	6.24211	5.57719	6.83539	6.23125	5.87396	6.13179	5.58312	5.85381	5.41102	5.38545	5.55096	5.58997	5.33961	5.92	10.9435	10.9846	10.6842	11.6516	5.22847	5.01622	0.27506	0.37803	T	T	1.1585	0.168022	0.514748	1.49e-16	1.61e-15	T	NM_004833; ENST00000368129; ENST00000368130; ENST00000411768; ENST00000481829; ENST00000612470; BC010940; OTTHUMT00000090341; OTTHUMT00000090342; OTTHUMT00000090343; OTTHUMT00000090344	chr1	-	Multiple_Complex	10	1q22
		aminoacyl tRNA synthetase complex-interacting multifunctional protein 1	TC0400008335.hg.1	AIMP1		11.0452	10.4664	10.9955	10.2888	10.5951	10.9483	0.44493	8.14045	9.76531	9.60031	10.6432	10.3426	10.3567	10.7819	9.54809	9.37321	9.67972	9.93562	10.8236	11.0998	11.1017	11.0885	9.67822	9.75214	9.58729	9.49297	10.6073	11.0193	0.330026	0.320806	T	T	-1.33056	0.284226	0.644234	2.69e-09	5.89e-09	T	NM_001142415; NM_001142416; NM_004757; ENST00000358008; ENST00000394701; ENST00000442366; ENST00000510207; BC014051; OTTHUMT00000253960; OTTHUMT00000253961; OTTHUMT00000363661	chr4	+	Multiple_Complex	10	4q24
		aminoacyl tRNA synthetase complex-interacting multifunctional protein 2	TC0700006634.hg.1	AIMP2		8.75101	8.2158	9.51383	7.04549	7.77987	8.18132	0.0825041	8.12401	7.84811	8.1554	8.84449	9.33168	8.96602	8.91699	9.80487	9.61457	10.0232	9.87065	9.35139	9.59178	9.95766	9.61558	6.96293	7.18501	7.37115	7.01993	7.71214	8.80548	0.57599	0.652332	T	T	-2.13368	0.000412768	0.0235984	2.22e-09	4.91e-09	T	NM_006303; ENST00000223029; ENST00000395236; ENST00000400479; ENST00000415999; BC002853; BC010156; BC013630; OTTHUMT00000242834; OTTHUMT00000325472; OTTHUMT00000325473; OTTHUMT00000325474	chr7	+	Multiple_Complex	10	7p22
		aryl hydrocarbon receptor interacting protein	TC1100008139.hg.1	AIP		9.85244	9.38204	10.0117	9.992	9.57854	9.88653	0.771332	9.47898	10.6854	11.256	8.06876	8.24717	8.46546	8.3358	8.09365	8.064	8.23136	8.19218	9.18968	8.97469	9.12188	9.33634	9.19228	8.99523	8.95429	9.16164	9.87101	9.83002	0.214837	0.327375	T	T	1.02882	0.701485	0.904137	1.23e-11	3.98e-11	T	NM_001302959; NM_001302960; NM_003977; ENST00000279146; ENST00000525341; ENST00000528641; ENST00000529797; BC104797; BC104827; OTTHUMT00000395515; OTTHUMT00000395516; OTTHUMT00000395517; OTTHUMT00000395519	chr11	+	Multiple_Complex	10	11q13.3
		aryl hydrocarbon receptor interacting protein-like 1	TC1700009586.hg.1	AIPL1		3.10002	3.34996	3.54699	3.29486	3.31285	3.55443	0.738847	4.34396	4.58491	3.97739	3.42638	3.46543	3.49159	3.36836	2.64784	2.78223	3.17616	3.24253	3.43761	2.81854	3.27063	3.38037	3.09644	3.42939	3.15041	3.13547	3.30422	3.33665	0.144949	0.224006	F	F	-1.02273	0.781904	0.933638	5.02e-05	6.65e-05	F	NM_001033054; NM_001033055; NM_001285399; NM_001285400; NM_001285401; NM_001285402; NM_001285403; NM_014336; ENST00000250087; ENST00000381128; ENST00000381129; ENST00000570466; ENST00000570584; ENST00000571740; ENST00000574506; ENST00000574913; ENST00000575265; ENST00000576307; ENST00000576776; ENST00000621374; BC012055; OTTHUMT00000219828; OTTHUMT00000439077; OTTHUMT00000439078; OTTHUMT000004390…	chr17	-	Multiple_Complex	10	17p13.1
		autoimmune regulator	TC2100007354.hg.1	AIRE		7.81234	6.66218	7.11093	7.58525	7.33812	7.39884	0.513386	8.12826	8.16289	7.58812	7.65969	7.70082	7.47095	7.75358	6.93494	7.23043	7.13896	7.11425	7.31632	6.92673	7.03759	7.31104	7.17779	7.19912	7.29971	7.09273	7.40596	7.16849	0.128782	0.579687	T	T	1.17893	0.260393	0.61917	0.00353236	0.00398832	T	NM_000383; ENST00000291582; ENST00000337909; ENST00000397994; ENST00000527919; ENST00000530812; BC137268; BC137270; OTTHUMT00000195842; OTTHUMT00000390494; OTTHUMT00000390495; OTTHUMT00000467237; OTTHUMT00000467238	chr21	+	Multiple_Complex	10	21q22.3
		adherens junctions associated protein 1	TC0100006650.hg.1	AJAP1		6.61641	4.57893	7.27394	6.90513	4.80922	4.77272	0.571918	4.96941	5.44981	4.80983	4.56597	4.70418	4.50855	5.15131	5.38089	5.41791	6.07887	5.05327	4.49707	4.59513	4.39527	5.01333	6.13373	6.49187	6.82187	6.73138	4.79171	6.54382	1.22075	1.40515	F	T	-3.36851	0.211536	0.567411	0.00687776	0.00760265	F	NM_001042478; NM_018836; ENST00000378190; ENST00000378191; ENST00000466761; OTTHUMT00000001542; OTTHUMT00000001543; OTTHUMT00000001645	chr1	+	Multiple_Complex	10	1p36.32
		ajuba LIM protein	TC1400010715.hg.1	AJUBA		5.32721	5.21743	4.47428	4.6311	5.91091	5.57118	0.478579	8.42944	7.20185	8.3621	7.2173	7.9137	7.74263	7.74353	4.72746	4.98393	5.04632	4.72804	4.20231	4.55909	3.93799	4.30743	3.94088	4.7637	4.47306	4.44492	5.51319	5.27008	0.662958	0.464007	T	T	1.18354	0.220152	0.578296	1.46e-12	5.69e-12	T	NM_001289097; NM_032876; NM_198086; ENST00000262713; ENST00000361265; ENST00000397388; ENST00000553592; ENST00000553736; ENST00000553911; ENST00000555479; ENST00000556731; BC007580; BC034968; OTTHUMT00000071685; OTTHUMT00000257240; OTTHUMT00000413452; OTTHUMT00000413453; OTTHUMT00000413454; OTTHUMT00000413455; OTTHUMT00000413456	chr14	-	Multiple_Complex	10	14q11.2
		adenylate kinase 1	TC0900012277.hg.1	AK1		9.02895	7.93035	9.5345	8.53983	8.1126	8.16977	0.320769	9.75128	9.80614	11.2301	8.97334	9.26915	9.28915	8.93985	8.40398	7.78005	8.3454	8.36328	12.5916	12.6656	12.7004	12.5304	7.83217	7.84068	7.53943	7.625	8.14235	8.92937	0.231926	0.820142	T	T	-1.7255	0.0529644	0.291876	2.58e-14	1.48e-13	T	NM_000476; ENST00000223836; ENST00000373156; ENST00000373176; ENST00000413016; ENST00000550143; ENST00000550992; BC001116; BC100022; OTTHUMT00000054307; OTTHUMT00000054309; OTTHUMT00000054310; OTTHUMT00000054311; OTTHUMT00000404003; OTTHUMT00000404004; uc004bsm.4	chr9	-	Coding	10	9q34.1
		adenylate kinase 2	TC0100013641.hg.1	AK2		9.52423	9.51964	9.40333	9.26022	9.49581	9.50346	0.521232	10.0903	10.8242	11.648	11.0329	10.7579	10.7123	10.8574	8.81792	8.95362	8.57917	8.74863	9.40989	9.55846	9.46432	9.62267	9.57431	9.21292	9.28854	9.05625	9.49948	9.52184	0.138279	0.0685152	T	T	-1.01562	0.71062	0.907657	5.37e-12	1.86e-11	T	NM_001199199; NM_001625; NM_013411; NR_037591; NR_037592; ENST00000354858; ENST00000373449; ENST00000466029; ENST00000467905; ENST00000469238; ENST00000480134; ENST00000482191; ENST00000487289; ENST00000491241; ENST00000548033; ENST00000548559; ENST00000550338; ENST00000551979; ENST00000626911; ENST00000629371; BC009405; BC070127; BC090040; OTTHUMT00000011883; OTTHUMT00000011884; OTTHUMT000000118…	chr1	-	Multiple_Complex	10	1p34
		adenylate kinase 3	TC0900009437.hg.1	AK3		12.0594	12.2558	12.5289	11.7422	12.2646	12.4903	0.679578	11.149	11.543	11.9906	13.5233	13.7109	13.6134	13.7189	8.19906	8.67801	8.37615	8.18826	12.7763	13.0545	13.2846	13.1719	11.3974	11.3027	11.101	11.1254	12.2195	12.2744	0.383742	0.235798	T	T	-1.03877	0.573525	0.83945	2.58e-17	3.68e-16	T	NM_001199852; NM_001199853; NM_001199855; NM_001199856; NM_016282; ENST00000359883; ENST00000381809; ENST00000447596; ENST00000611749; BC013771; OTTHUMT00000051584; OTTHUMT00000051585; OTTHUMT00000470758	chr9	-	Multiple_Complex	10	9p24.1
		adenylate kinase 4	TC0100008618.hg.1	AK4		5.90458	4.77139	5.07444	5.91201	4.76986	5.50115	0.776895	6.01876	5.23083	4.79921	11.1943	11.4463	11.0591	10.9966	7.94753	8.5421	8.59351	8.05342	6.08992	7.31947	7.22499	6.9334	5.79084	5.7368	5.4081	5.79761	5.43444	5.12725	0.578518	0.58667	T	T	1.2373	0.656709	0.884206	4.38e-15	3.07e-14	T	NM_001005353; NM_013410; NM_203464; ENST00000327299; ENST00000395334; ENST00000470888; ENST00000474968; ENST00000479060; ENST00000497030; ENST00000545314; ENST00000546702; BC016180; BC040224; BC066944; BC136886; BC136887; BC146653; BC148270; OTTHUMT00000025040; OTTHUMT00000025041; OTTHUMT00000025042; OTTHUMT00000025043; OTTHUMT00000025044; OTTHUMT00000404161; uc001dby.3; uc001dbz.3	chr1	+	Multiple_Complex	10	1p31.3
		adenylate kinase 5	TC0100008797.hg.1	AK5		5.24616	4.3628	5.44587	5.4017	4.84118	3.68648	0.568616	6.66187	7.03922	4.0781	4.68385	4.13045	4.7017	4.15087	5.96102	5.97076	6.08973	6.10492	5.17325	4.78742	5.15723	4.55381	5.49197	5.15998	5.46658	5.34388	4.73417	5.3184	0.874595	0.576375	T	F	-1.49924	0.254267	0.613168	3.99e-06	5.91e-06	F	NM_012093; NM_174858; ENST00000317704; ENST00000344720; ENST00000354567; ENST00000465146; ENST00000466114; ENST00000466393; ENST00000469394; ENST00000478255; ENST00000478407; ENST00000524494; ENST00000527263; ENST00000530826; ENST00000531672; BC033896; BC036666; OTTHUMT00000026992; OTTHUMT00000026993; OTTHUMT00000026994; OTTHUMT00000092213; OTTHUMT00000092214; OTTHUMT00000092215; OTTHUMT000000922…	chr1	+	Multiple_Complex	10	1p31
		adenylate kinase 7	TC1400008118.hg.1	AK7		6.73809	6.73399	7.08135	7.42817	7.44811	7.0138	0.071059	5.54706	7.6144	6.3415	9.20639	8.77301	9.02525	9.13611	8.74519	8.86779	8.6527	8.77512	6.06766	4.85084	5.92733	6.45888	7.53262	8.07009	8.42823	8.1582	7.43773	6.73612	0.245196	0.199375	T	T	1.62632	0.134558	0.461708	7.12e-11	2.01e-10	T	NM_152327; ENST00000267584; ENST00000554313; ENST00000554706; ENST00000555570; ENST00000556643; OTTHUMT00000413340; OTTHUMT00000413341; OTTHUMT00000413342; OTTHUMT00000413343; OTTHUMT00000413344	chr14	+	Multiple_Complex	10	14q32.2
		adenylate kinase 8	TC0900011815.hg.1	AK8		7.40549	7.2544	7.73418	7.23939	7.02136	7.43899	0.281353	8.07868	8.05568	8.4147	6.47105	5.70409	5.93834	6.63769	9.28618	9.46431	10.1431	9.95444	7.36149	6.73284	6.71502	6.91265	6.02726	6.15049	5.87752	5.55294	7.23452	7.43527	0.208883	0.245307	T	T	-1.14929	0.389306	0.727908	3.72e-12	1.34e-11	T	NM_152572; ENST00000298545; ENST00000467161; ENST00000476719; ENST00000477396; ENST00000482422; BC034776; BC050576; OTTHUMT00000055413; OTTHUMT00000055414; OTTHUMT00000055415; OTTHUMT00000055416; OTTHUMT00000055417	chr9	-	Multiple_Complex	10	9q34.13
		adenylate kinase 9	TC0600012817.hg.1	AK9		6.74009	6.05914	6.96108	6.1559	6.41985	6.2025	0.312273	5.92971	7.48269	5.30065	5.82754	5.46426	6.35213	6.25812	8.24747	8.49275	8.7712	8.06955	6.02845	7.07784	6.16052	6.36964	6.36964	6.62016	6.27849	5.88101	6.18226	6.7148	0.140879	0.470111	T	T	-1.44648	0.268476	0.627938	4.15e-08	7.74e-08	T	NM_001145128; NM_145025; ENST00000285397; ENST00000355283; ENST00000368948; ENST00000424296; ENST00000448084; ENST00000466992; ENST00000470564; ENST00000490722; ENST00000491875; ENST00000524674; ENST00000532976; ENST00000605986; BC101714; BC111948; BC143533; uc003ptn.2	chr6	-	Multiple_Complex	10	6q21
		A kinase (PRKA) anchor protein 1	TC1700008376.hg.1	AKAP1		9.16786	8.88545	9.43949	9.51715	8.43512	9.03374	0.655862	13.2988	12.9291	13.3851	10.711	10.6807	10.4899	10.365	11.9984	12.2522	12.2239	11.8784	10.8628	11.2086	11.6436	11.3152	8.80632	8.78387	8.64859	8.68516	9.00451	9.16498	0.542037	0.277037	T	T	-1.11765	0.477118	0.786989	3.76e-15	2.67e-14	T	NM_001242902; NM_001242903; NM_003488; ENST00000314126; ENST00000337714; ENST00000481416; ENST00000539273; ENST00000570423; ENST00000571629; ENST00000572156; ENST00000572557; ENST00000572560; ENST00000572814; ENST00000573085; ENST00000573326; ENST00000574683; ENST00000575032; ENST00000575186; ENST00000575322; ENST00000576295; ENST00000576591; ENST00000621116; BC000729; OTTHUMT00000277069; OTTHUMT…	chr17	+	Multiple_Complex	10	17q22
		A kinase (PRKA) anchor protein 10	TC1700010041.hg.1	AKAP10		7.21523	7.81302	7.28733	7.03813	7.75468	7.48201	0.963785	6.14399	6.3232	6.57908	7.04126	6.31731	6.51502	6.06824	7.45032	7.17677	7.82848	7.32739	6.26551	6.574	6.95708	6.70648	8.1586	8.34774	8.27422	8.21218	7.44398	7.25275	0.361668	0.326318	T	T	1.14173	0.9569	0.989889	4.09e-07	6.74e-07	T	NM_007202; ENST00000225737; ENST00000395536; ENST00000460046; ENST00000474245; ENST00000571858; ENST00000572155; ENST00000572341; ENST00000576896; ENST00000578898; ENST00000582611; ENST00000583951; BC017055; OTTHUMT00000132380; OTTHUMT00000132382; OTTHUMT00000441144; OTTHUMT00000441145; OTTHUMT00000441146; OTTHUMT00000441147; OTTHUMT00000441148; OTTHUMT00000442202; OTTHUMT00000442204; OTTHUMT0000…	chr17	-	Multiple_Complex	10	17p11.1
		A kinase (PRKA) anchor protein 11	TC1300006989.hg.1	AKAP11		10.006	10.8413	9.93202	12.4807	11.2588	11.1619	0.0558817	10.096	9.68422	9.33312	8.77319	9.26612	9.08693	8.88756	11.5733	11.8161	11.3897	11.894	9.14701	9.10783	9.38517	9.44944	9.70319	10.2356	10.4647	10.2324	11.2123	9.97052	0.735027	0.504959	T	T	2.36491	0.000108592	0.0113313	2.78e-09	6.06e-09	T	NM_016248; ENST00000025301; OTTHUMT00000044700; uc001uys.2	chr13	+	Multiple_Complex	10	13q14.11
		A kinase (PRKA) anchor protein 12	TC0600009862.hg.1	AKAP12		8.00307	8.1261	6.63717	10.0562	8.27093	8.13161	0.190635	8.39348	7.51369	9.39887	7.4996	8.08424	8.26652	8.60326	15.1299	15.0031	14.9315	15.0449	9.10479	9.14005	9.35124	9.1175	11.6728	11.5622	11.7857	11.745	8.20411	8.06208	1.0732	0.826411	T	T	1.10346	0.0041902	0.0798858	3.91e-15	2.77e-14	T	NM_005100; NM_144497; ENST00000253332; ENST00000354675; ENST00000359755; ENST00000402676; ENST00000490177; OTTHUMT00000042712; OTTHUMT00000042713; OTTHUMT00000042714	chr6	+	Multiple_Complex	10	6q24-q25
		A kinase (PRKA) anchor protein 13; microRNA 7706	TC1500008187.hg.1	AKAP13; MIR7706		10.7131	10.5427	10.3045	11.3129	10.6247	10.5491	0.317035	10.6108	10.7591	10.6423	11.1341	10.9033	11.3092	11.3043	10.9685	11.2986	11.3437	11.4774	11.3525	11.5598	11.6783	11.7244	13.216	13.2834	13.1426	13.1823	10.5885	10.5263	0.420835	0.205216	T	T	1.04401	0.1397	0.469889	3.49e-11	1.04e-10	T	NM_001270546; NM_006738; NM_007200; NR_106993; ENST00000361243; ENST00000394510; ENST00000394518; ENST00000557852; ENST00000558009; ENST00000558092; ENST00000558166; ENST00000558644; ENST00000558811; ENST00000559278; ENST00000559362; ENST00000559391; ENST00000559486; ENST00000559820; ENST00000560185; ENST00000560256; ENST00000560302; ENST00000560340; ENST00000560482; ENST00000560571; ENST00000560…	chr15	+	Multiple_Complex	10	15q24-q25
		A kinase (PRKA) anchor protein 14	TC0X00008264.hg.1	AKAP14		4.1703	4.03425	4.5433	3.33562	3.81279	3.77853	0.0484789	4.99184	4.05262	4.11182	4.09165	4.41938	4.36318	4.37457	8.48515	8.7672	8.75807	8.88593	4.10806	4.05399	4.19448	4.64064	3.7305	3.9321	3.87682	4.16778	3.79496	4.19398	0.266156	0.263556	F	F	-1.31861	0.00582254	0.093318	1.22e-17	1.94e-16	F	NM_001008534; NM_001008535; NM_178813; ENST00000334356; ENST00000371422; ENST00000371425; ENST00000371431; ENST00000491105; BC066357; OTTHUMT00000058075; OTTHUMT00000058076; OTTHUMT00000058077; OTTHUMT00000058078	chrX	+	Multiple_Complex	10	Xq24
		Homo sapiens A kinase (PRKA) anchor protein 17A (AKAP17A), transcript variant 1, mRNA.; Homo sapiens A kinase (PRKA) anchor protein 17A (AKAP17A), transcript variant 2, non-coding RNA.; A kinase (PRKA) anchor protein 17A [Source:HGNC Symbol;Acc:HGNC:18783]; Homo sapiens splicing factor, arginine/serine-rich 17A, mRNA (cDNA clone MGC:39904 IMAGE:5217247), complete cds.; Homo sapiens splicing facto…	TC0Y00007319.hg.1	AKAP17A; SFRS17A		7.56982	6.86566	6.88451	6.87506	6.8132	7.50314	0.899831	5.1892	5.23734	6.27407	7.69348	8.26019	8.13062	7.52419	8.49357	8.41057	8.21238	7.63438	7.48061	8.18502	7.67502	8.01994	8.2297	7.3636	7.42544	7.84604	6.84539	6.87547	0.381735	0.401216	T	T	-1.02107	0.883695	0.970073	1.44e-07	2.51e-07	T	NM_005088_2; NR_027383_2; ENSTR0000313871; ENSTR0000381261; ENSTR0000474361; BC028151_2; BC110496_2; BC110497_2; CCDS14116.1_2; hsa_circ_0002575; uc004fpn.4; uc010nvx.2; uc065coc.1	chrY	+	Multiple_Complex	10
		A kinase (PRKA) anchor protein 2	TC0900012157.hg.1	AKAP2		9.03112	8.42276	8.2359	9.17795	8.31817	8.79333	0.594041	9.27492	8.68776	8.76354	10.4184	10.6244	10.1191	10.2663	7.82694	7.07643	7.47946	7.52848	9.80932	10.2773	10.1233	9.87539	11.94	11.6687	11.8203	11.8428	8.77034	8.43594	0.430684	0.415811	T	T	1.26085	0.410673	0.742204	5.93e-14	3.14e-13	T	NM_001004065; NM_001136562; NM_001198656; ENST00000259318; ENST00000374525; ENST00000434623; ENST00000471798; ENST00000480388; ENST00000482335; ENST00000485762; ENST00000495980; BC146863; BC171800; OTTHUMT00000053607; OTTHUMT00000053609; OTTHUMT00000053610; OTTHUMT00000053613; OTTHUMT00000346067; OTTHUMT00000356276; OTTHUMT00000356277; OTTHUMT00000356278	chr9	+	Multiple_Complex	10	9q31.3
		A kinase (PRKA) anchor protein 3	TC1200009676.hg.1	AKAP3		5.53396	4.65237	5.68924	4.65594	5.19493	4.93669	0.368846	4.46077	4.68938	5.14588	3.90139	3.49168	3.52466	2.96918	13.4684	13.5162	13.7491	13.6723	3.97769	3.35955	3.67137	3.74449	3.42672	3.83535	3.35878	3.86955	4.93074	5.60843	0.269573	0.559227	T	T	-1.59958	0.1759	0.526633	5.31e-22	5.29e-20	T	NM_001278309; NM_006422; ENST00000228850; ENST00000536414; ENST00000540967; ENST00000541484; ENST00000544636; ENST00000545990; BC047535; OTTHUMT00000398911; OTTHUMT00000398912; OTTHUMT00000398913; OTTHUMT00000398914; OTTHUMT00000398915	chr12	-	Multiple_Complex	10	12p13.3
		A kinase (PRKA) anchor protein 4	TC0X00009677.hg.1	AKAP4		5.71866	5.47788	5.12351	4.80856	5.92135	5.01555	0.643217	7.9317	7.24516	5.98181	5.56473	5.05809	5.61746	4.83822	17.0868	16.7324	17.0502	17.0895	5.05031	4.8027	4.57184	5.06214	4.8454	4.47386	5.33688	4.58696	4.94416	5.45113	0.591836	0.299376	T	T	-1.42106	0.498493	0.797947	2.64e-23	5.33e-21	T	NM_003886; NM_139289; ENST00000358526; ENST00000376064; ENST00000437370; ENST00000448865; ENST00000480926; ENST00000481402; BC126250; BC126252; OTTHUMT00000056551; OTTHUMT00000056552; OTTHUMT00000056553; OTTHUMT00000056554; OTTHUMT00000056555; OTTHUMT00000056556; uc004dow.1	chrX	-	Multiple_Complex	10	Xp11.2
		A kinase (PRKA) anchor protein 5	TC1400007441.hg.1	AKAP5		3.12587	3.04085	3.27168	3.73755	2.88862	3.62861	0.378514	7.44678	4.9625	4.51418	3.34448	3.12302	4.29199	3.51383	3.23971	3.53568	3.50578	3.63022	3.17421	3.3494	3.40617	3.66803	5.05413	3.74255	5.20289	3.64475	3.68086	3.1389	0.461905	0.116742	F	F	1.45595	0.444811	0.76592	7.1e-07	1.14e-06	F	NM_004857; ENST00000320636; ENST00000394718; BC131516; OTTHUMT00000073901; OTTHUMT00000268070; uc001xhd.4	chr14	+	Coding	10	14q23.3
		A kinase (PRKA) anchor protein 6	TC1400006853.hg.1	AKAP6		6.00464	5.95531	5.64116	9.40483	5.97077	6.12995	0.311661	5.47455	5.91848	6.18875	3.74641	3.40772	5.12758	4.7752	8.06344	8.21442	8.12702	8.06374	11.6317	11.838	11.7271	11.7294	4.45903	5.15848	4.5674	4.63361	6.05361	5.97897	1.93834	0.197164	T	T	1.0531	0.0297777	0.219024	1.6e-11	5.07e-11	T	NM_004274; ENST00000280979; ENST00000553547; ENST00000554410; ENST00000554449; ENST00000554740; ENST00000555207; ENST00000555950; ENST00000556037; ENST00000556540; ENST00000556638; ENST00000557102; ENST00000557272; ENST00000557354; ENST00000557396; ENST00000557708; BC137232; BC137233; BC150288; OTTHUMT00000276617; OTTHUMT00000409744; OTTHUMT00000409745; OTTHUMT00000409746; OTTHUMT00000409747; OTT…	chr14	+	Multiple_Complex	10	14q12
		A kinase (PRKA) anchor protein 7	TC0600009446.hg.1	AKAP7		9.05989	9.47232	9.14954	9.48544	9.57704	9.4861	0.0884309	7.58601	5.47543	7.10715	8.10801	8.10598	8.3893	8.4276	6.19694	6.18952	6.14129	5.82921	6.38898	6.19678	6.40837	6.75967	6.404	5.8852	6.34426	5.95401	9.48578	9.14595	0.0526955	0.216919	T	T	1.26561	0.147024	0.481665	6.47e-16	5.75e-15	T	NM_004842; NM_016377; NM_138633; ENST00000263050; ENST00000342266; ENST00000366358; ENST00000431975; ENST00000474850; ENST00000479599; ENST00000535150; ENST00000537868; ENST00000541650; ENST00000543815; OTTHUMT00000042209; OTTHUMT00000042210; OTTHUMT00000042211; OTTHUMT00000042212; OTTHUMT00000402017; OTTHUMT00000402018; OTTHUMT00000402019; OTTHUMT00000402036; OTTHUMT00000402037; OTTHUMT000004020…	chr6	+	Multiple_Complex	10	6q23
		A kinase (PRKA) anchor protein 8	TC1900009866.hg.1	AKAP8		8.25411	7.67789	7.99124	7.94977	7.6422	7.81265	0.411712	6.51197	6.75584	7.44796	7.90229	7.84737	7.58719	7.69898	7.22104	7.52707	7.07615	7.38542	9.32088	9.67365	9.75838	9.53563	8.62436	7.8339	8.24509	7.99283	7.8042	7.97826	0.154086	0.288479	T	T	-1.12823	0.412741	0.743343	1.95e-10	5.11e-10	T	NM_005858; ENST00000269701; ENST00000537303; ENST00000595416; ENST00000598597; ENST00000599883; BC037270; OTTHUMT00000461292; OTTHUMT00000461293; OTTHUMT00000461295; OTTHUMT00000461296; OTTHUMT00000461298	chr19	-	Multiple_Complex	10	19p13.1
		A kinase (PRKA) anchor protein 8-like	TC1900009867.hg.1	AKAP8L		11.0751	10.02	10.453	11.2638	10.3635	10.9157	0.456874	10.8711	10.8575	12.1581	10.4704	10.7166	10.8544	10.7472	12.277	12.2925	12.1791	12.3275	11.6902	11.7912	11.8621	11.8706	10.5644	10.3131	10.135	10.2477	10.8696	10.4981	0.453961	0.530386	T	T	1.2937	0.162701	0.505911	1.41e-08	2.79e-08	T	NM_001291478; NM_014371; NR_111971; ENST00000397410; ENST00000593845; ENST00000594594; ENST00000594893; ENST00000595067; ENST00000595087; ENST00000595136; ENST00000595465; ENST00000595879; ENST00000596195; ENST00000596213; ENST00000596750; ENST00000597994; ENST00000598292; ENST00000599137; ENST00000599488; ENST00000600065; ENST00000600247; ENST00000601147; ENST00000609519; BC000713; OTTHUMT000004…	chr19	-	Multiple_Complex	10	19p13.12
		A kinase (PRKA) anchor protein 9	TC0700008318.hg.1	AKAP9		10.2271	10.6227	10.3781	10.6401	10.6256	10.723	0.100511	8.34716	8.72799	9.42937	8.17456	8.51903	8.64859	8.67206	8.76037	9.09856	8.48023	8.9479	10.0171	10.2997	10.1139	9.48591	10.1098	9.79326	9.9051	10.1136	10.6331	10.399	0.0525826	0.199672	T	T	1.17623	0.239883	0.59782	3.11e-10	7.88e-10	T	NM_005751; NM_147185; ENST00000356239; ENST00000358100; ENST00000359028; ENST00000394534; ENST00000394564; ENST00000435423; ENST00000438114; ENST00000463118; ENST00000484815; ENST00000486313; ENST00000487258; ENST00000487692; ENST00000491695; ENST00000493453; ENST00000493976; ENST00000619023; OTTHUMT00000253808; OTTHUMT00000258932; OTTHUMT00000258933; OTTHUMT00000258934; OTTHUMT00000258935; OTTHU…	chr7	+	Multiple_Complex	10	7q21-q22
		A kinase (PRKA) interacting protein 1	TC1100006796.hg.1	AKIP1		6.77385	6.21632	5.63793	5.79671	6.22184	6.05645	0.626691	6.38113	6.9278	7.01252	5.26698	5.27013	5.32163	4.92775	6.53575	6.07878	6.15326	6.0747	5.83475	5.39529	6.67497	5.48377	5.98734	6.10634	5.36186	5.98406	6.03502	6.21074	0.214303	0.567992	T	T	-1.12953	0.539081	0.819796	0.00146687	0.00170569	T	NM_001206646; NM_001206647; NM_001206648; NM_020642; NR_045417; NR_045418; ENST00000299576; ENST00000309357; ENST00000309377; ENST00000396648; ENST00000524577; ENST00000525005; ENST00000529876; ENST00000529942; ENST00000530281; ENST00000534147; ENST00000534506; BC030996; OTTHUMT00000385614; OTTHUMT00000385615; OTTHUMT00000385616; OTTHUMT00000385617; OTTHUMT00000385618; OTTHUMT00000385619; OTTHUMT…	chr11	+	Multiple_Complex	10	11p15.3
		akirin 1	TC0100007884.hg.1	AKIRIN1		8.42538	8.24833	8.8789	8.40001	7.88067	8.05617	0.169203	6.60582	8.05378	6.65732	9.32236	9.61738	9.32792	9.36618	10.8539	10.8515	10.5788	10.586	8.85861	9.32978	9.02172	9.33738	8.86455	9.29777	8.33315	9.31556	8.08825	8.45927	0.264178	0.325229	T	T	-1.29327	0.100646	0.403639	1.39e-11	4.44e-11	T	NM_001136275; NM_024595; ENST00000372984; ENST00000432648; ENST00000446189; ENST00000531822; BC119745; OTTHUMT00000019687; OTTHUMT00000388642; OTTHUMT00000388643; OTTHUMT00000388645	chr1	+	Multiple_Complex	10	1p34.3
		akirin 2	TC0600012514.hg.1	AKIRIN2		9.73966	9.59078	10.3075	8.52526	9.28308	9.151	0.0492395	6.59644	7.10819	6.13726	8.0767	8.0938	8.32607	7.9307	8.09013	7.73748	8.06605	7.2606	11.5732	11.7532	11.8621	11.3424	9.93154	10.2517	9.80112	10.4747	9.2106	9.7216	0.404822	0.378213	T	T	-1.42504	0.00192145	0.052495	1.43e-14	8.75e-14	T	NM_018064; ENST00000257787; ENST00000420494; BC000764; BC003042; BC005051; OTTHUMT00000041455; OTTHUMT00000472518	chr6	-	Multiple_Complex	10	6q15
		AT-hook transcription factor	TC0900011284.hg.1	AKNA		6.40075	6.55996	6.43869	6.32143	6.54931	6.13986	0.367932	7.61638	7.75314	7.39847	7.50991	7.19356	7.22159	6.90266	6.96726	6.29132	6.71378	6.86555	6.36283	6.40021	6.26339	6.49758	9.65719	9.43098	9.39544	10.2314	6.33312	6.44199	0.205161	0.08316	T	T	-1.07838	0.559757	0.830497	5.16e-13	2.22e-12	T	NM_030767; ENST00000223791; ENST00000307564; ENST00000312033; ENST00000374075; ENST00000374079; ENST00000374088; ENST00000490767; ENST00000491133; ENST00000492875; BC055285; OTTHUMT00000053767; OTTHUMT00000053768; OTTHUMT00000053769; OTTHUMT00000053770; OTTHUMT00000053771; OTTHUMT00000053772; OTTHUMT00000215121	chr9	-	Multiple_Complex	10	9q32
		AKNA domain containing 1	TC0100018461.hg.1	AKNAD1		3.92449	3.77077	3.82581	3.84188	4.15074	3.5903	0.908352	5.9342	4.89569	5.81289	3.82047	3.99445	3.63219	4.00418	7.90482	7.32048	7.51353	7.13378	3.72834	3.91743	4.40965	3.16034	3.00059	3.69848	3.2545	3.42526	3.85646	3.83485	0.280707	0.0778855	F	F	1.01509	0.937003	0.984898	1.58e-13	7.63e-13	F	NM_152763; NR_049760; ENST00000369994; ENST00000369995; ENST00000370001; ENST00000461774; ENST00000466413; ENST00000472781; ENST00000474186; ENST00000477908; ENST00000603450; BC150642; OTTHUMT00000030922; OTTHUMT00000030923; OTTHUMT00000030924; OTTHUMT00000030925; OTTHUMT00000031108; OTTHUMT00000031109; OTTHUMT00000032361; OTTHUMT00000032362; OTTHUMT00000468998	chr1	-	Multiple_Complex	10	1p13.3
		aldo-keto reductase family 1, member A1 (aldehyde reductase)	TC0100008126.hg.1	AKR1A1		9.9523	9.2778	9.94921	9.16222	9.16949	9.39858	0.111592	11.7195	11.8786	12.1467	11.7028	12.0146	12.0966	11.7929	6.88311	6.84991	6.41179	6.84346	8.75623	8.40055	8.77747	8.75367	9.69369	9.68977	9.49361	9.43729	9.166	9.95069	0.134413	0.388534	T	T	-1.72272	0.0235523	0.192731	9.94e-18	1.64e-16	T	NM_001202413; NM_001202414; NM_006066; NM_153326; ENST00000351829; ENST00000372070; ENST00000434299; ENST00000471651; ENST00000473038; ENST00000475919; ENST00000475985; ENST00000476957; ENST00000481885; ENST00000487654; ENST00000495913; ENST00000496999; ENST00000497973; ENST00000621846; BC000670; BC005394; OTTHUMT00000020851; OTTHUMT00000020852; OTTHUMT00000020853; OTTHUMT00000020854; OTTHUMT0000…	chr1	+	Multiple_Complex	10	1p33-p32
		aldo-keto reductase family 1, member B1 (aldose reductase)	TC0700012684.hg.1	AKR1B1		16.1453	18.2064	15.9293	16.9597	17.8036	17.7913	0.384906	16.7433	16.6926	17.2837	9.14271	9.2889	9.22018	9.27863	10.6225	10.6183	10.5285	10.6342	13.2727	13.5472	13.2281	13.3323	11.2116	10.945	10.7007	10.9105	17.7972	16.0417	0.483715	1.25698	T	T	3.37652	0.048755	0.280799	1.05e-17	1.7e-16	T	NM_001628; ENST00000285930; ENST00000426422; ENST00000434222; ENST00000462784; ENST00000465351; ENST00000467251; ENST00000467829; ENST00000484592; ENST00000487438; ENST00000489022; ENST00000491741; ENST00000497983; ENST00000498373; ENST00000498771; BC000260; BC005387; BC010391; OTTHUMT00000339448; OTTHUMT00000339449; OTTHUMT00000339450; OTTHUMT00000339451; OTTHUMT00000339452; OTTHUMT00000339453; …	chr7	-	Multiple_Complex	10	7q35
		aldo-keto reductase family 1, member B10 (aldose reductase)	TC0700009230.hg.1	AKR1B10		6.0615	5.87464	4.49363	4.20976	5.20663	5.31148	0.402479	7.12052	5.38225	4.32943	6.39798	6.81468	7.26655	6.91325	3.698	3.35916	3.65829	3.36733	6.4985	6.41018	7.82677	6.78502	3.77402	3.79848	3.69776	3.99218	5.25692	5.96426	0.608075	0.85638	T	T	-1.63279	0.139681	0.469889	7.21e-10	1.72e-09	T	NM_020299; ENST00000359579; ENST00000475559; ENST00000496435; ENST00000498818; BC008837; OTTHUMT00000339615; OTTHUMT00000339616; OTTHUMT00000339617; OTTHUMT00000339725	chr7	+	Multiple_Complex	10	7q33
		aldo-keto reductase family 1, member B15	TC0700009231.hg.1	AKR1B15		6.97497	6.54496	5.9298	5.77792	5.74515	6.40987	0.246247	5.10803	5.71952	4.77923	8.5698	8.80701	7.16064	8.64824	4.19831	4.68641	4.73037	5.06511	10.0847	9.92017	10.4255	10.4841	4.72543	4.64179	3.98078	4.6042	5.7622	6.50073	0.374675	0.525311	T	T	-1.66847	0.163368	0.507288	4.94e-14	2.66e-13	T	NM_001080538; ENST00000423958; ENST00000457545; ENST00000467156; OTTHUMT00000339726; OTTHUMT00000339727	chr7	+	Multiple_Complex	10	7q33
		aldo-keto reductase family 1, member C1	TC1000012427.hg.1	AKR1C1		7.0764	7.83264	7.05218	10.8032	8.07511	7.67584	0.206155	7.36633	5.6996	6.3934	14.1931	14.4009	14.3364	14.5528	6.9185	6.717	6.91658	6.82244	15.2189	15.2545	15.5844	15.3298	4.99564	4.92702	4.69817	4.97403	7.88362	7.06478	1.70209	0.443773	T	T	1.76398	0.0028871	0.0662123	1.08e-17	1.76e-16	T	NM_001353; ENST00000380859; ENST00000380872; ENST00000442997; ENST00000476100; ENST00000477661; BC015490; BC020216; BC040210; OTTHUMT00000046523; OTTHUMT00000046524; OTTHUMT00000046525; OTTHUMT00000046526; OTTHUMT00000046527	chr10	+	Multiple_Complex	10	10p15-p14
		aldo-keto reductase family 1, member C2	TC1000012516.hg.1	AKR1C2		7.49667	7.78614	7.41458	11.6638	7.92763	7.64408	0.309299	6.98098	7.78272	5.95093	14.3904	14.6907	14.5265	14.6047	6.14749	5.9967	5.89844	6.44535	15.5979	15.5021	15.7051	15.728	4.41921	4.90499	4.86217	5.26182	7.79164	7.49554	2.24342	0.195187	T	T	1.22782	0.016308	0.160638	9.07e-16	7.77e-15	T	NM_001135241; NM_001354; NM_205845; ENST00000380753; ENST00000421196; ENST00000455190; ENST00000460124; ENST00000603073; ENST00000604184; ENST00000604428; ENST00000604439; ENST00000604507; ENST00000604711; BC007024; BC063574; OTTHUMT00000046531; OTTHUMT00000046532; OTTHUMT00000468442; OTTHUMT00000468443; OTTHUMT00000468444; OTTHUMT00000468445; OTTHUMT00000468446; OTTHUMT00000468447; OTTHUMT000004…	chr10	-	Multiple_Complex	10	10p15-p14
		aldo-keto reductase family 1, member C3	TC1000012428.hg.1	AKR1C3		8.58657	10.0095	6.64322	10.4087	8.63174	9.08411	0.435815	8.19894	7.52593	8.14039	14.9546	15.0929	14.7923	15.0189	7.00481	6.70702	6.92907	6.61525	14.4827	14.6372	14.6777	14.5526	4.83403	5.33284	4.63358	4.83659	9.14997	8.45956	0.923457	1.68983	T	T	1.61374	0.0684493	0.331989	2.84e-16	2.8e-15	T	NM_001253908; NM_001253909; NM_003739; ENST00000380554; ENST00000439082; ENST00000470862; ENST00000480697; ENST00000480822; ENST00000602997; ENST00000603312; ENST00000603484; ENST00000605149; ENST00000605322; ENST00000605781; BC001479; BC019230; OTTHUMT00000046533; OTTHUMT00000046534; OTTHUMT00000046535; OTTHUMT00000046536; OTTHUMT00000468450; OTTHUMT00000468451; OTTHUMT00000468452; OTTHUMT000004…	chr10	+	Multiple_Complex	10	10p15-p14
		aldo-keto reductase family 1, member C4	TC1000006611.hg.1	AKR1C4		4.19393	4.58595	3.85503	4.39522	4.11975	4.36667	0.737184	5.82286	4.63233	5.02874	11.9164	11.9724	12.0491	12.2846	4.26506	3.94444	4.63066	3.91991	6.3305	5.42373	5.32387	6.4657	3.61151	4.00161	3.97698	3.80019	4.38036	4.20772	0.151475	0.365781	F	F	1.12712	0.764784	0.926521	1.84e-19	5.91e-18	F	NM_001818; ENST00000263126; ENST00000380448; ENST00000469875; BC020744; OTTHUMT00000046543; OTTHUMT00000046544; uc001ihw.2	chr10	+	Multiple_Complex	10	10p15.1
		aldo-keto reductase family 1, member C8, pseudogene	TC1000009659.hg.1	AKR1C8P		4.66094	4.56035	4.46418	4.59123	4.31596	3.7446	0.249115	5.37635	6.8055	4.91428	5.59982	5.55813	6.63966	6.73858	3.6091	3.909	3.87797	4.05603	5.18884	3.98065	3.56316	4.84577	4.07657	4.27487	4.3861	4.05313	4.26312	4.56153	0.431858	0.0983884	F	T	-1.22979	0.334959	0.688723	1.4e-06	2.18e-06	F	NR_027916; ENST00000578467; ENST00000584929; BC101204; BC101205	chr10	-	Multiple_Complex	10	10p15.1
		aldo-keto reductase family 1, member D1	TC0700013466.hg.1	AKR1D1		3.65059	3.12287	3.11439	3.80863	3.39958	2.91857	0.811355	7.28341	5.43138	3.70233	7.56861	7.30188	7.65641	7.74793	4.58849	4.25764	4.00487	4.45238	3.27956	3.27697	3.05661	3.38713	2.93581	3.28069	3.23721	3.02964	3.381	3.1188	0.445514	0.307156	F	F	1.1993	0.719783	0.910147	1.83e-16	1.92e-15	F	NM_001190906; NM_001190907; NM_005989; ENST00000242375; ENST00000411726; ENST00000432161; ENST00000438242; ENST00000470851; BC130625; BC130627; OTTHUMT00000341636; OTTHUMT00000341637; OTTHUMT00000341643; OTTHUMT00000341644; OTTHUMT00000342271	chr7	+	Multiple_Complex	10	7q32-q33
		aldo-keto reductase family 1, member E2	TC1000006604.hg.1	AKR1E2		6.13208	5.98032	6.3899	5.60672	4.95157	5.08685	0.0149504	5.18051	3.79263	3.96837	5.08729	4.22669	4.81269	4.07854	10.477	9.76912	10.5747	10.0568	6.22454	5.27066	5.84907	6.01853	5.57851	4.83761	3.97397	5.71818	5.06889	6.15496	0.345877	0.207066	T	T	-2.12295	0.0157713	0.158494	2.96e-13	1.34e-12	T	NM_001040177; NM_001271021; NM_001271025; NR_073125; NR_073126; NR_073127; ENST00000298375; ENST00000334019; ENST00000345253; ENST00000441590; ENST00000462718; ENST00000463345; ENST00000474119; ENST00000487985; ENST00000525281; ENST00000525572; ENST00000525627; ENST00000532248; ENST00000533295; BC002862; OTTHUMT00000046515; OTTHUMT00000046516; OTTHUMT00000046517; OTTHUMT00000046518; OTTHUMT000000…	chr10	+	Multiple_Complex	10	10p15.1
		aldo-keto reductase family 7, member A2	TC0100013131.hg.1	AKR7A2		9.07858	9.1065	9.23158	8.27583	9.3779	9.26529	0.663106	6.75982	5.76825	7.57482	9.18054	9.56386	9.12755	9.53109	8.34645	8.29139	8.11249	8.25383	8.3554	7.76141	8.02144	7.77349	7.30662	6.96445	7.25495	6.81011	9.3193	9.09589	0.606392	0.0814796	T	T	1.16749	0.495326	0.796467	1.01e-10	2.78e-10	T	NM_003689; ENST00000235835; ENST00000330072; ENST00000481966; ENST00000489286; ENST00000492217; BC004111; BC010852; BC011586; BC012171; BC013996; OTTHUMT00000007165; OTTHUMT00000355679; OTTHUMT00000355680; OTTHUMT00000355683; OTTHUMT00000355684	chr1	-	Multiple_Complex	10	1p36.13
		aldo-keto reductase family 7, member A3 (aflatoxin aldehyde reductase)	TC0100013129.hg.1	AKR7A3		6.8491	5.58869	5.93759	5.65075	5.78354	5.6938	0.33286	5.01056	4.44952	6.28212	9.48516	9.69271	8.64244	8.9111	4.49867	4.7318	4.61393	3.94028	4.83452	4.78959	4.83655	5.24822	4.96286	4.71492	5.04751	4.77113	5.70209	6.00299	0.0677491	0.650796	T	T	-1.23191	0.159806	0.501815	1.46e-13	7.08e-13	T	NM_012067; ENST00000361640; BC025709; BC031562; BC042420; OTTHUMT00000007166	chr1	-	Coding	10	1p36.13
		aldo-keto reductase family 7-like (gene/pseudogene)	TC0100013128.hg.1	AKR7L		6.67019	5.90536	5.9728	6.34342	6.21716	6.82735	0.413782	5.87315	6.33384	7.56956	7.80484	7.64273	6.58469	8.03187	5.59572	5.43191	5.63148	5.68067	5.95266	6.0004	5.55964	5.94068	5.39412	5.4342	5.03948	6.35637	6.32717	5.94046	0.322093	0.423451	T	T	1.30741	0.395309	0.732391	7.05e-06	1.02e-05	T	NR_040288; NR_040289; OTTHUMT00000007163; OTTHUMT00000127796; OTTHUMT00000346740	chr1	-	Multiple_Complex	10	1p36.13|1p35-p36.1
		v-akt murine thymoma viral oncogene homolog 1	TC1400010377.hg.1	AKT1		11.857	11.9988	11.4322	11.7564	11.7977	11.6158	0.83679	13.864	13.5757	13.3386	11.525	11.7309	11.5819	11.6305	9.30993	9.52687	9.56248	9.4505	9.8208	10.1402	9.93552	10.1874	10.6359	10.825	10.618	10.6662	11.7553	11.8382	0.0953621	0.294865	T	T	-1.05909	0.817295	0.947178	3.24e-16	3.15e-15	T	NM_001014431; NM_001014432; NM_005163; ENST00000349310; ENST00000402615; ENST00000407796; ENST00000544168; ENST00000553506; ENST00000553797; ENST00000554192; ENST00000554581; ENST00000554585; ENST00000554826; ENST00000554848; ENST00000555380; ENST00000555458; ENST00000555528; ENST00000555926; ENST00000556836; ENST00000557494; ENST00000557552; ENST00000610370; BC000479; BC084538; OTTHUMT0000041037…	chr14	-	Multiple_Complex	10	14q32.32
		AKT1 substrate 1 (proline rich)	TC1900012006.hg.1	AKT1S1		8.70076	9.42827	9.40527	8.25187	9.03835	9.06148	0.332072	9.45529	8.84691	9.26656	8.84297	8.92086	9.54704	9.41351	8.05687	8.39586	7.77692	7.36019	9.31451	9.69397	9.32356	9.43233	8.04608	8.78443	8.12925	8.3644	9.04944	9.4163	0.460896	0.413549	T	T	-1.28954	0.180217	0.531847	6.86e-05	8.98e-05	T	NM_001098632; NM_001098633; NM_001278159; NM_001278160; NM_032375; ENST00000344175; ENST00000391830; ENST00000391831; ENST00000391832; ENST00000391833; ENST00000391834; ENST00000391835; ENST00000482622; ENST00000599525; BC007416; BC016043; BC051844; OTTHUMT00000317069; OTTHUMT00000317070; OTTHUMT00000317071; OTTHUMT00000317072; OTTHUMT00000317073; OTTHUMT00000317074; OTTHUMT00000317075; OTTHUMT00…	chr19	-	Multiple_Complex	10	19q13.33
		Memczak2013 ANTISENSE, coding, INTERNAL, intronic best transcript NM_001098633	TC1900008561.hg.1	AKT1S1		6.65857	7.5811	7.03276	7.40832	7.21104	6.68436	0.977276	7.36461	7.7312	7.17325	7.35115	7.18324	7.1402	7.53603	6.68783	6.42107	6.45405	6.56834	8.07668	7.40344	6.97819	7.47926	6.79126	7.51971	7.48973	6.76491	7.17511	7.07387	0.374261	0.463997	T	T	1.0727	0.970341	0.993795	0.0320204	0.0338746	T	hsa_circ_0000950	chr19	+	NonCoding	6
		v-akt murine thymoma viral oncogene homolog 2	TC1900010696.hg.1	AKT2		9.76608	10.4732	9.89472	9.17609	10.2577	10.5927	0.943996	7.50846	6.05823	8.12082	11.9301	12.1127	11.689	11.8882	9.07769	9.23117	9.16331	8.75524	10.512	10.627	10.9344	10.662	10.2208	9.93079	9.96438	10.2641	10.2316	9.84499	0.740357	0.376659	T	T	1.30734	0.894005	0.97135	9.82e-13	3.96e-12	T	NM_001243027; NM_001243028; NM_001626; ENST00000311278; ENST00000358335; ENST00000391844; ENST00000391845; ENST00000392037; ENST00000392038; ENST00000416362; ENST00000416994; ENST00000423127; ENST00000424901; ENST00000427375; ENST00000441941; ENST00000452077; ENST00000456441; ENST00000476247; ENST00000476266; ENST00000480878; ENST00000483166; ENST00000486368; ENST00000486647; ENST00000487537; ENS…	chr19	-	Multiple_Complex	10	19q13.1-q13.2
		v-akt murine thymoma viral oncogene homolog 3	TC0100017984.hg.1	AKT3		9.85548	9.87386	9.54769	10.6727	9.8052	10.1136	0.186386	7.91485	8.50022	8.24085	5.86706	6.86658	5.73151	6.28368	11.288	10.9545	11.2008	10.7078	8.55852	8.53596	8.89676	8.48407	9.5624	9.20908	8.89012	9.88701	10.165	9.8643	0.439724	0.183239	T	T	1.23171	0.136049	0.464386	2.96e-13	1.34e-12	T	NM_001206729; NM_005465; NM_181690; ENST00000263826; ENST00000336199; ENST00000366539; ENST00000366540; ENST00000463991; ENST00000490018; ENST00000491219; ENST00000492957; ENST00000550388; ENST00000552631; BC121154; OTTHUMT00000096479; OTTHUMT00000096480; OTTHUMT00000096481; OTTHUMT00000096482; OTTHUMT00000096483; OTTHUMT00000096507; OTTHUMT00000404568; OTTHUMT00000404569; OTTHUMT00000404570; uc0…	chr1	-	Multiple_Complex	10	1q44
[truncated: 20,829 more rows]
[truncated: 39 more columns]
