# Supplementary material for: Familial Hyperaldosteronism Type 3 with a Rapidly Growing Adrenal Tumor: An In Situ Aldosterone Imaging Study
Source: Curr Issues Mol Biol. 2021 Dec 28;44(1):128–38. doi: 10.3390/cimb44010010 (PMC8929039; doi:10.3390/cimb44010010)
Supplement: Supplementary file 1 [file cimb-44-00010-s001.zip › Table_S3, clinical course.xlsx]

## Sheet: clinical course
Age (yrs old)	events	systolic BP (mmHg)	diastric BP (mmHg)	Cr (mg/dl)	Spironolactone (mg)	Doxazosin Mesilate (mg)	Nifedipine (mg)	Imidapril hydrochloride (mg)	Losartan Potassium (mg)	Carvedilol (mg)	Amlodipine Besilate (mg)	Atenolol (mg)	Telmisartan/ Amlodipine Besilate (mg)
15	bilatral adrenal swelling (left > right) on CT imaging	175	96	3.2	150	2	40	10	50	-	-	-	-
16	after the laparoscopic left adrenalectomy	144	90	3.43	150	-	50	-	-	-	-	-	-
17	peritoneal dialysis is started	179	123	6.86	150	2	50	-	-	-	-	-	-
20	hospitalization for heart failure/ maintenance dialysis is started	160	102	12.7	150	-	50	-	-	-	-	-	-
27	after laparoscopic right adrenalectomy	154	91		100	-	-	-	-	20	5	50	40/5
