# Supplementary figures and images for: Familial Hyperaldosteronism Type 3 with a Rapidly Growing Adrenal Tumor: An In Situ Aldosterone Imaging Study
Source: MDPI journal article supplement (doi:10.3390/cimb44010010), 2021-12-28

**Figure S5**

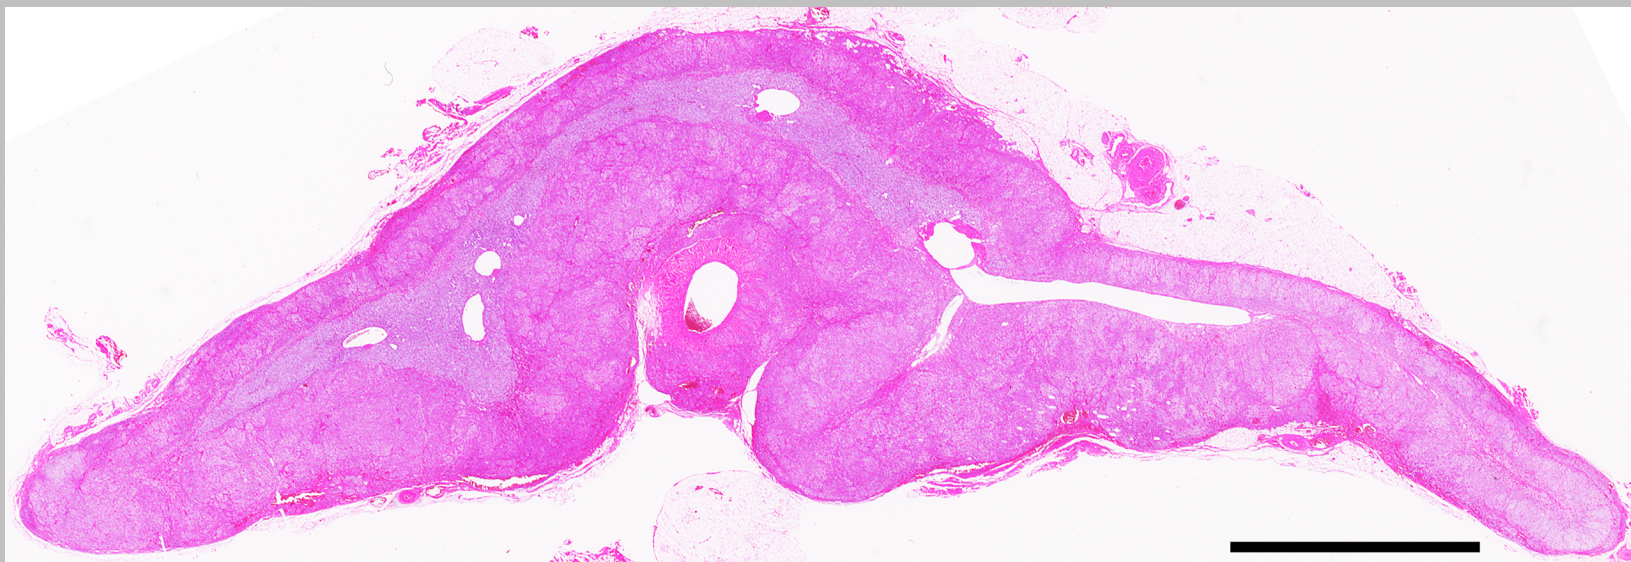

Left adrenal, H&E

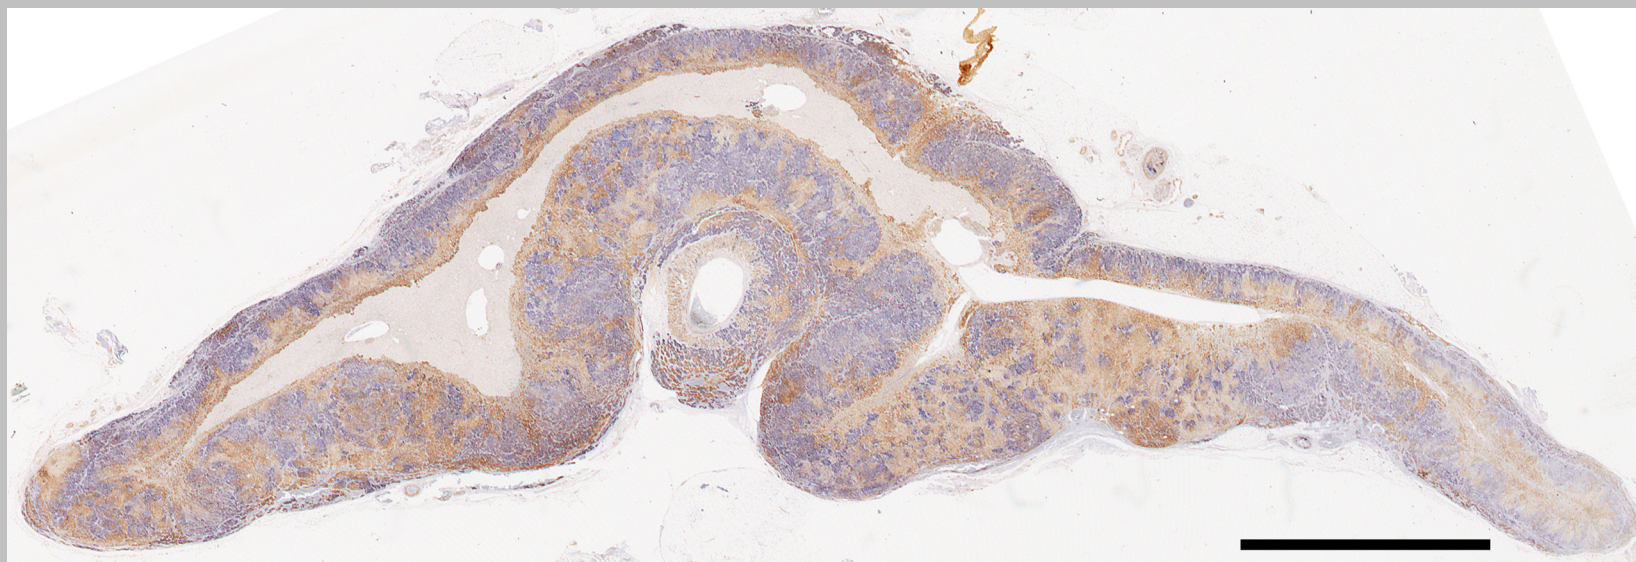

Left adrenal, CYP11B2 & CYP11B1

bars: 5 mm

Supplement: s1 [file s1]

Figure S3

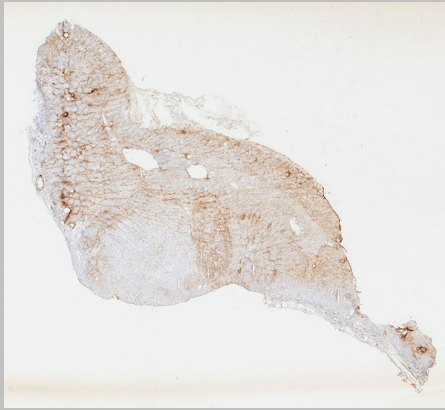

FB5, B1, 42764

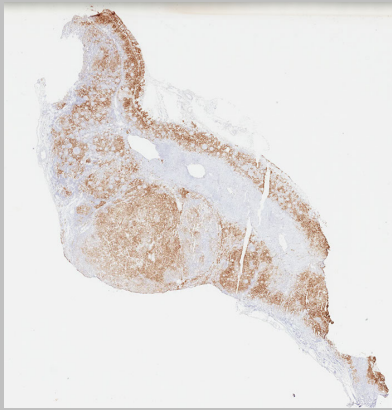

FB5, B2, 42763

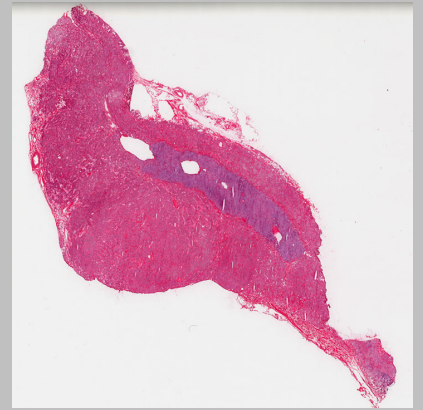

FB5, HE, 42765

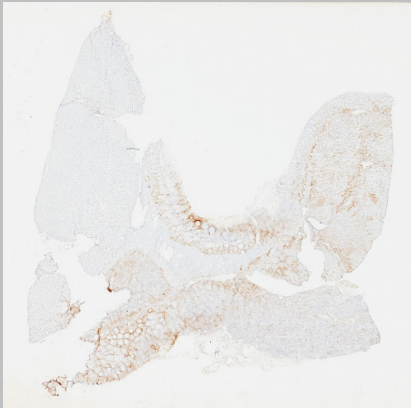

FB10, B1, 42721

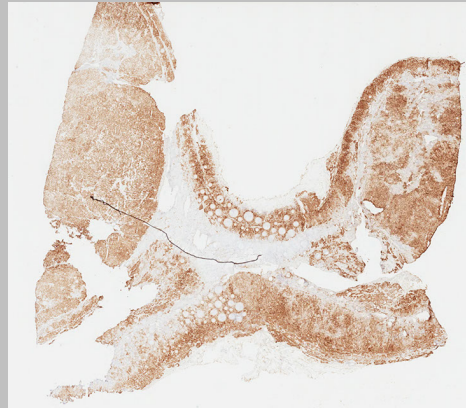

FB10, B2, 42722

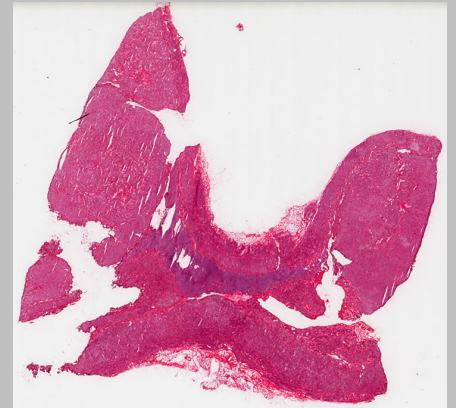

FB10, HE, 42723

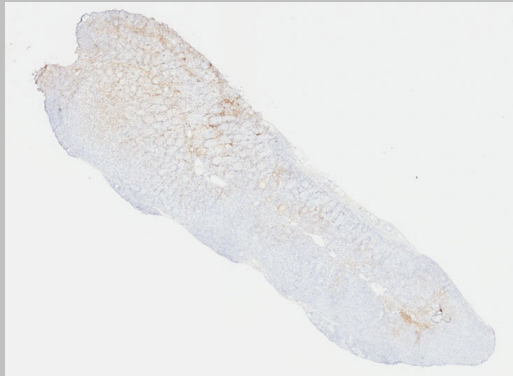

FB15-1, B1, 42784

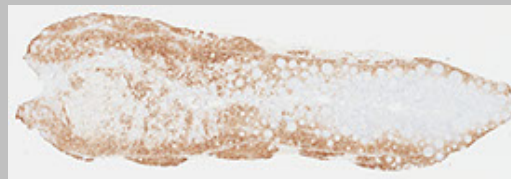

FB15-1, B2, 42719

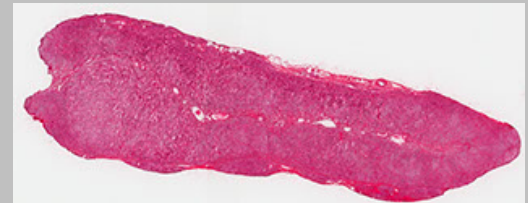

FB15-1, HE, 43221

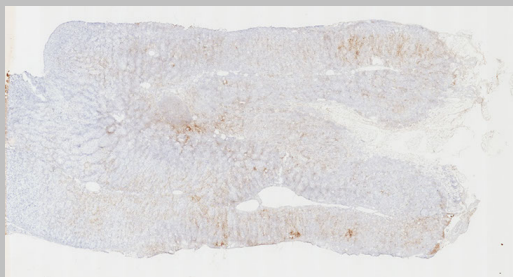

FB15-2, B1, 42715

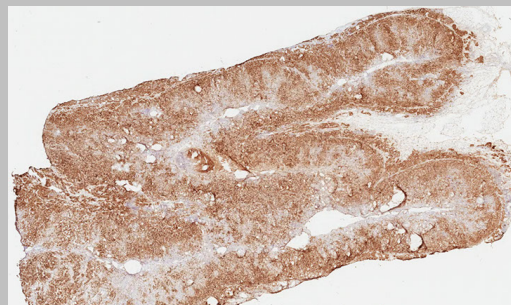

FB15-2, B2, 42716

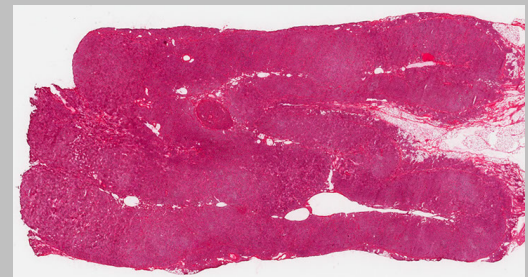

FB15-2, HE, 42717

Supplement: s1 [file s1]

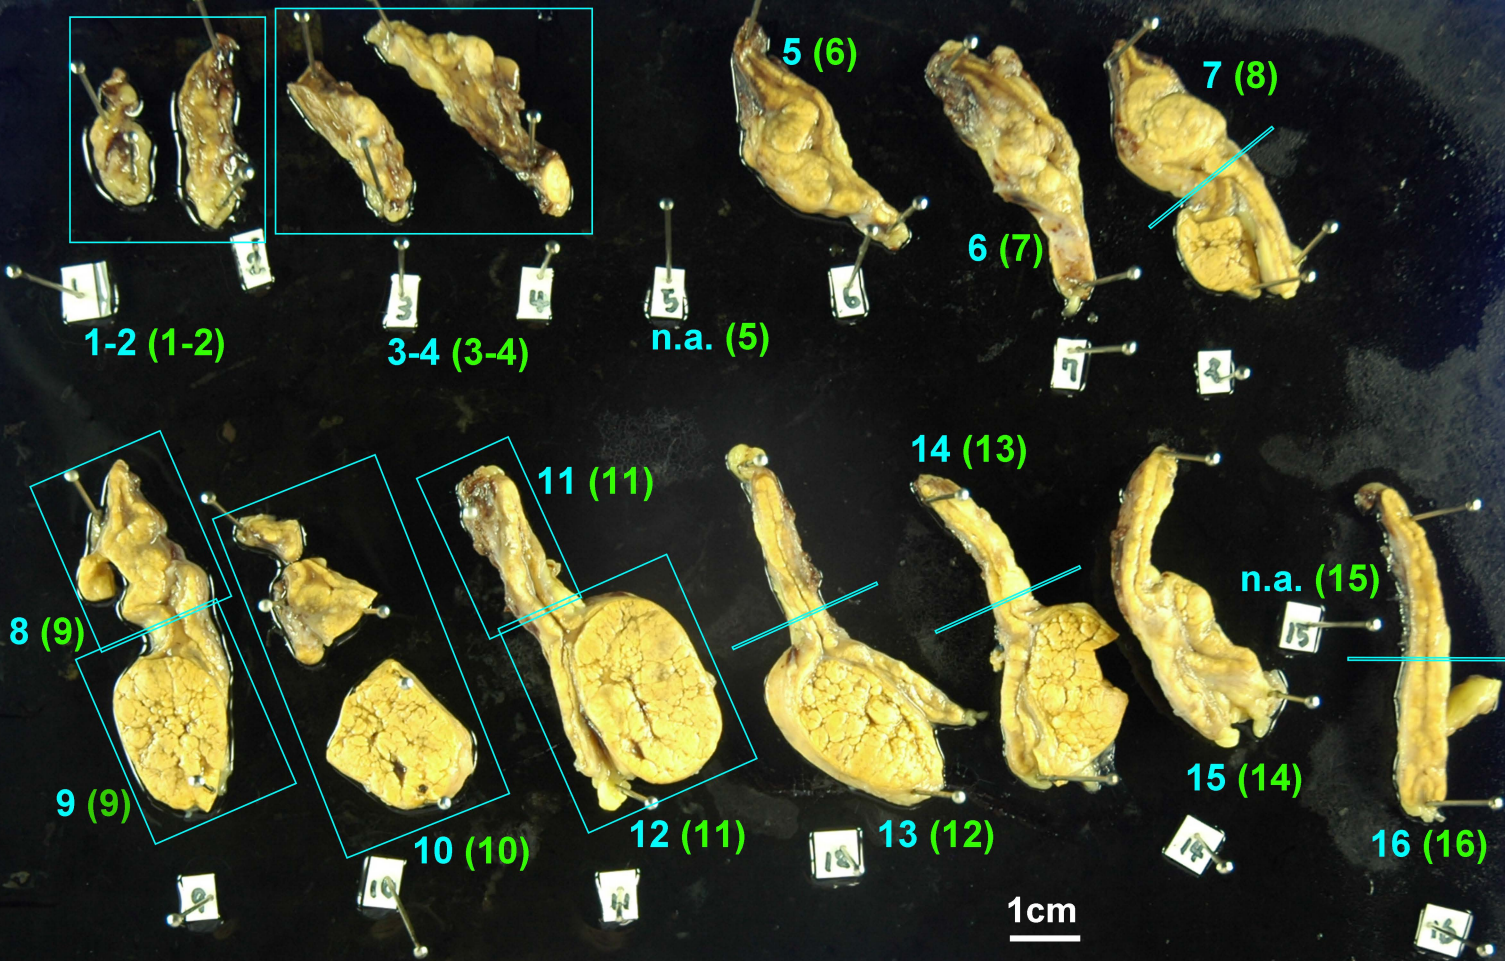

Supplement: s1 [file s1]
